# Supplementary material for: Harmonization of an incompatible aqueous aldol condensation/oxa-Michael addition/reduction cascade process over a core–shell-structured thermoresponsive catalyst
Source: Royal Society of Chemistry journal article supplement (doi:10.1039/d3gc01670f), 2023-01-01

Supporting Information

**Harmonization of an incompatible aqueous Aldol  
condensation/oxa-Michael addition/reduction cascade process  
over a core-shell-structured thermoresponsive catalyst**

Yu Su, Chengyi Wang, Qipeng Chen, Yuanli Zhu, Shaomin Deng, Shoujin Yang,  
Ronghua Jin, and Guohua Liu\*

*Key Laboratory of Resource Chemistry of Ministry of Education, Shanghai Key  
Laboratory of Rare Earth Functional Materials, Shanghai Normal University,  
Shanghai 200234, P. R. China. E-mail: ghliu@shnu.edu.cn*

**CONTENTS**

|                                                                                                       |      |
|-------------------------------------------------------------------------------------------------------|------|
| <b>Experimental.</b> .....                                                                            | S2   |
| <b>Figure S1.</b> DLS traces of <b>1-2</b> and catalyst <b>3</b> .....                                | S13  |
| <b>Figure S2.</b> Temperature-dependent transmittance using a turbidity measurement...S14             |      |
| <b>Figure S3.</b> The SEM images and dispersive situations of catalyst <b>3</b> . .....               | S15  |
| <b>Figure S4.</b> The NMR spectra .....                                                               | S16  |
| <b>Figure S5.</b> Average hydrodynamic diameters distribution measurement of <b>3</b> .....S19        |      |
| <b>Table S1.</b> Optimizing reaction conditions for the Aldol/addition reaction. ....S25              |      |
| <b>Table S2.</b> Optimizing reaction conditions for the DKR-ATH reaction. ....S25                     |      |
| <b>Figure S6.</b> HPLC analyses of chiral products .....                                              | S26  |
| <b>Figure S7.</b> Characterizations of chiral products .....                                          | S62  |
| <b>Table S3.</b> The single-crystal structure data of ( <i>S,S</i> )- <b>7ah</b> .....S98             |      |
| <b>Table S4.</b> Reusability of catalyst <b>3</b> .....S99                                            |      |
| <b>Figure S8.</b> Reusability of catalyst <b>3</b> . .....                                            | S100 |
| <b>Figure S9.</b> Contrastive <sup>1</sup> H-NMR spectra for deuterium labeling experiments. ....S103 |      |

## Experimental

**1. General:** All reactions involving air- or moisture-sensitive reagents or intermediates were carried out in oven-dried glassware using standard Schlenk techniques. All commercially available reagents were purchased from Sigma-Aldrich, Alfa Aesar, TCI Chemicals, Acros Organics, or ABCR in the highest purity grade and used without further purification.

**2. Characterization:** Ru loading amounts in the catalysts were analyzed using an inductively coupled plasma optical emission spectrometer (ICP-OES, Varian VISTA-MPX). Molecular weights and molecular weight distributions were determined by gel permeation chromatography (GPC) equipped with Waters 1515 pump and Waters 2414 differential refractive index detector (set at 30 °C), employing a series of three linear Styragel columns (HR1, HR2, and HR4) at an oven temperature of 45 °C. The eluent was DMF at a flow rate of 1.0 mL/min. A series of low polydispersity polystyrene standards were employed for calibration. Solid-state NMR experiments were explored on a Bruker AVANCE spectrometer at a magnetic field strength of 9.4 T with <sup>1</sup>H frequency of 400.1 MHz, and <sup>13</sup>C frequency of 100.5 MHz with 4 mm rotor at two spinning frequencies of 5.5 kHz and 8.0 kHz, TPPM decoupling is applied in the during the acquisition period. <sup>1</sup>H cross-polarization in the solid-state NMR experiments was employed using a contact time of 2 ms and pulse lengths of 4 μs. Liquid-state NMR (<sup>1</sup>H NMR and <sup>13</sup>C NMR) spectra were performed on a Bruker AVANCE spectrometer at a magnetic field strength of 9.4 T with a <sup>1</sup>H frequency of 400 MHz and a <sup>13</sup>C frequency of 100 MHz. Data are reported as follows: chemical shift, multiplicity (s = single, d = doublet, t = triplet, q = quartet, brs = broad single, m = multiplet), coupling constants (Hz), and integration. Mass spectra were recorded on a Finnigan MAT 4200S, a Bruker Daltonics Micro Tof, and a Waters-Micromass Quatro LCZ (ESI); peaks are given in m/z (% of basis peak).

**3. General procedure for the Aldol condensation/oxa-Michael addition process.** A typical procedure was as follows: The base (0.12 mmol of DBU salt-loadings based on ICP analysis), **4aa** (0.10 mmol), **5aa** (0.12 mmol), HCO<sub>2</sub>Na (1.0 mmol), and/or 2.50 mol% of additive in 4.0 mL of H<sub>2</sub>O/<sup>i</sup>PrOH (v/v = 1:3) were added sequentially to a 10.0 mL round-bottom flask purged with nitrogen in turn. The mixture was stirred at 70 °C for 12 h. After completion of the reaction, the aqueous solution was extracted by Et<sub>2</sub>O (3 × 3.0 mL). The combined Et<sub>2</sub>O was washed with brine twice and dehydrated with Na<sub>2</sub>SO<sub>4</sub>. After the evaporation of Et<sub>2</sub>O, the residue was purified by silica gel flash column chromatography to afford **6aa** as a white solid.

**4. General procedure for the DKR-ATH process.** A typical procedure was as follows: The catalyst (2.50 mol% of Ru-loading), **6aa** (0.10 mmol), HCO<sub>2</sub>Na (1.0 mmol), and/or additive (0.12 mmol) in 4.0 mL of H<sub>2</sub>O/<sup>i</sup>PrOH (v/v = 1:3) were added sequentially to a

10.0 mL round-bottom flask purged with nitrogen in turn at room temperature. The resulting mixture was stirred at 40 °C for 18 h. After completion of the reaction, the aqueous solution was extracted by Et<sub>2</sub>O (3 × 3.0 mL). The combined Et<sub>2</sub>O was washed with brine twice and dehydrated with Na<sub>2</sub>SO<sub>4</sub>. After the evaporation of Et<sub>2</sub>O, the residue was purified by silica gel flash column chromatography to afford (*S,S*)-**7aa** as a white solid.

**5. Reusability of catalyst 3 in the Aldol/addition/DKR-ATH cascade process of 4aa and 5aa.** A typical procedure was as follows: The catalyst **3** (0.12 mmol of DBU salt-loadings and 2.50 mol% of Ru-loadings based on ICP analyses), 1.0 equivalent of **4aa**, 1.20 equivalent of **5aa**, and 10.0 equivalent of HCOONa in 4.0 mL of H<sub>2</sub>O/*i*PrOH (v/v = 1:3), and the mixture stirred at 70 °C for the first 12 h followed at 40 °C for 10 h. After completion of the reaction, the heterogeneous catalyst was separated for the recycling experiment. The aqueous solution was extracted by Et<sub>2</sub>O (3 × 3.0 mL). The combined Et<sub>2</sub>O was washed with brine twice and dehydrated with Na<sub>2</sub>SO<sub>4</sub>. After the evaporation of Et<sub>2</sub>O, the residue was purified by silica gel flash column chromatography to afford (*S,S*)-**7aa**.

## 6. Deuterium experiments

**6.1** A typical procedure for the aldol/addition reaction of **4aa** and **5aa-*d*<sub>1</sub>** in deuterated D<sub>2</sub>O/CD<sub>3</sub>OD is as follows: The catalyst **3** (0.12 mmol of DBU salt-loadings based on ICP analysis), **4aa** (0.10 mmol), **5aa** (0.12 mmol), and HCO<sub>2</sub>Na (1.0 mmol) in 4.0 mL of D<sub>2</sub>O/CD<sub>3</sub>OD (v/v = 1:3) were added sequentially to a 10.0 mL round-bottom flask purged with nitrogen in turn. The mixture was stirred at 70 °C for 12 h. After completion of the reaction, the aqueous solution was extracted by Et<sub>2</sub>O (3 × 3.0 mL). The combined Et<sub>2</sub>O was washed with brine twice and dehydrated with Na<sub>2</sub>SO<sub>4</sub>. After the evaporation of Et<sub>2</sub>O, the residue was purified by silica gel flash column chromatography to afford the desired product **6aa** in a 95% isolated yield.

**6.2** A typical procedure for the DKR-ATH reaction of **6aa** in deuterated D<sub>2</sub>O/CD<sub>3</sub>OD is as follows: The catalyst **3** (0.12 mmol of DBU salt-loadings and 2.50 mol% of Ru based on ICP analyses), **6aa** (0.10 mmol), and HCO<sub>2</sub>Na (1.0 mmol) in 4.0 mL of D<sub>2</sub>O/CD<sub>3</sub>OD (v/v = 1:3) were added sequentially to a 10.0 mL round-bottom flask purged with nitrogen in turn. The resulting mixture was stirred at 40 °C for 18 h. After completion of the reaction, the aqueous solution was extracted by Et<sub>2</sub>O (3 × 3.0 mL). The combined Et<sub>2</sub>O was washed with brine twice and dehydrated with Na<sub>2</sub>SO<sub>4</sub>. After the evaporation of Et<sub>2</sub>O, the residue was purified by silica gel flash column chromatography to afford (*S,S*)-**7aa-*d*<sub>3</sub>** in a 93% isolated yield.

## 9. Data of chiral products.

**7aa: (2S,4S)-2-(4-bromophenyl)chroman-4-ol.** White solid, 91% yield, 99% *ee*, 37/1

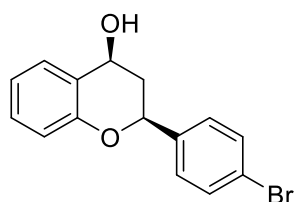

*dr.* <sup>1</sup>H NMR (400 MHz, Methanol-*d*<sub>4</sub>) δ 7.56 – 6.80 (m, 8H), 5.17 (dd, *J* = 12.0, 1.8 Hz, 1H), 5.09 – 5.04 (m, 1H), 2.44 – 1.94 (m, 2H). <sup>13</sup>C NMR (100 MHz, Methanol-*d*<sub>4</sub>) δ 155.77, 141.95, 132.66, 129.69, 128.22, 127.62, 122.65, 121.87, 117.34, 77.61, 66.12, 41.05. HRMS (APCI): *m/z* [M-OH<sup>+</sup>]

calcd. for C<sub>15</sub>H<sub>12</sub>OBr<sup>+</sup> 287.00660; found 287.00698. HPLC (Chiralpak AD-H, elute: Hexanes/*i*-PrOH = 95/5, detector: 210 nm, flow rate: 1.0 mL/min, 25 °C).

**7ab: (2S,4S)-2-(4-fluorophenyl)chroman-4-ol.** White solid, 86% yield, 99% *ee*, 39/1

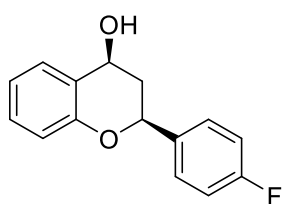

*dr.* <sup>1</sup>H NMR (400 MHz, Methanol-*d*<sub>4</sub>) δ 7.51 – 6.79 (m, 8H), 5.16 (dd, *J* = 12.1, 1.8 Hz, 1H), 5.06 – 5.04 (m, 1H), 2.39 – 2.00 (m, 2H). <sup>13</sup>C NMR (100 MHz, Methanol-*d*<sub>4</sub>) δ 165.08, 162.64, 155.86, 138.63 (d, *J* = 3.2 Hz), 129.67, 129.18, 129.10, 128.21, 127.60, 121.80, 117.33, 116.30, 116.08, 77.65, 66.19,

41.10. HRMS (APCI): *m/z* [M-OH<sup>+</sup>] calcd. for C<sub>15</sub>H<sub>12</sub>OF<sup>+</sup> 227.08667; found 227.08615. HPLC (Chiralpak AD-H, elute: Hexanes/*i*-PrOH = 95/5, detector: 210 nm, flow rate: 1.0 mL/min, 25 °C).

**7ac: (2S,4S)-2-(4-chlorophenyl)chroman-4-ol.** White solid, 92% yield, 99% *ee*, 17/1

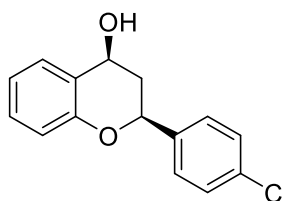

*dr.* <sup>1</sup>H NMR (400 MHz, Methanol-*d*<sub>4</sub>) δ 7.66 – 6.84 (m, 8H), 5.20 (dd, *J* = 12.0, 1.9 Hz, 1H), 5.08 (dd, *J* = 10.8, 6.2 Hz, 1H), 2.47 – 1.93 (m, 2H). <sup>13</sup>C NMR (100 MHz, Methanol-*d*<sub>4</sub>) δ 154.36, 140.02, 133.26, 128.28, 128.23, 127.36, 126.81, 126.20, 120.45, 115.92, 76.16, 64.71, 39.65. HRMS (APCI):

*m/z* [M-OH<sup>+</sup>] calcd. for C<sub>15</sub>H<sub>12</sub>OCl<sup>+</sup> 243.05712; found 243.05752. HPLC (Chiralpak AD-H, elute: Hexanes/*i*-PrOH = 95/5, detector: 210 nm, flow rate: 1.0 mL/min, 25 °C).

**7ad: (2S,4S)-2-(3-chlorophenyl)chroman-4-ol.** White solid, 87% yield, 99% *ee*,

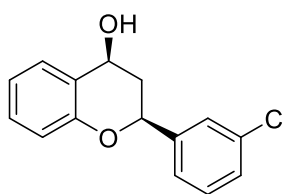

14/1*dr.* <sup>1</sup>H NMR (400 MHz, Methanol-*d*<sub>4</sub>) δ 7.53 – 6.84 (m, 8H), 5.20 (dd, *J* = 12.0, 1.8 Hz, 1H), 5.09 (ddt, *J* = 10.8, 6.2, 0.9 Hz, 1H), 2.47 – 1.95 (m, 2H). <sup>13</sup>C NMR (100 MHz, Methanol-*d*<sub>4</sub>) δ 154.27, 143.58, 134.02, 129.72, 128.31, 127.60, 126.81, 126.20, 125.71, 124.04, 120.50, 115.94,

76.08, 64.66, 39.70. HRMS (APCI): *m/z* [M-OH<sup>+</sup>] calcd. for C<sub>15</sub>H<sub>12</sub>OCl<sup>+</sup> 243.05712; found 243.05627. HPLC (Chiralpak AD-H, elute: Hexanes/*i*-PrOH = 95/5, detector: 210 nm, flow rate: 1.0 mL/min, 25 °C).

**7ae: (2S,4S)-2-(2-chlorophenyl)chroman-4-ol.** White solid, 82% yield, 99% *ee*, 37/1 *dr*. <sup>1</sup>H NMR (400 MHz, Methanol-*d*<sub>4</sub>) δ 7.52 – 7.40 (m, 5H), 7.17 – 7.16 (m, 1H), 6.83 (dd, *J* = 8.2, 1.2 Hz, 1H), 5.19 (dd, *J* = 12.0, 1.9 Hz, 1H), 5.08 (ddt, *J* = 10.8, 6.2, 0.9 Hz, 1H), 2.45 – 1.92 (m, 2H). <sup>13</sup>C NMR (100 MHz, Methanol-*d*<sub>4</sub>) δ 154.10, 142.05, 132.02, 131.20, 130.30, 128.35, 127.77, 126.85, 126.16, 125.51, 120.62, 115.94, 75.45, 64.55, 39.50. HRMS (APCI): *m/z* [M-OH<sup>+</sup>] calcd. for C<sub>15</sub>H<sub>12</sub>OCl<sup>+</sup> 243.05712; found 243.05739. HPLC (Chiralpak AD-H, elute: Hexanes/*i*-PrOH = 97/3, detector: 210 nm, flow rate: 1.0 mL/min, 25 °C).

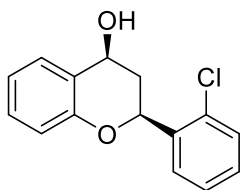

**7af: (2S,4S)-2-phenylchroman-4-ol.** White solid, 86% yield, 99% *ee*, 23/1 *dr*. <sup>1</sup>H NMR (400 MHz, Methanol-*d*<sub>4</sub>) δ 7.53 – 6.82 (m, 9H), 5.18 (dd, *J* = 12.0, 1.8 Hz, 1H), 5.20 – 5.06 (m, 1H), 2.45 – 2.01 (m, 2H). <sup>13</sup>C NMR (100 MHz, Methanol-*d*<sub>4</sub>) δ 154.58, 141.18, 128.24, 128.13, 127.64, 126.78, 126.25, 125.73, 120.31, 115.93, 76.96, 64.87, 39.80. HRMS (APCI): *m/z* [M-OH<sup>+</sup>] calcd. for C<sub>15</sub>H<sub>13</sub>O<sup>+</sup> 209.09609; found 209.09560. HPLC (Chiralpak AD-H, elute: Hexanes/*i*-PrOH = 95/5, detector: 210 nm, flow rate: 1.0 mL/min, 25 °C).

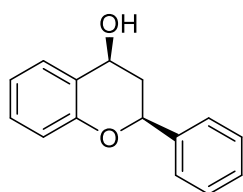

**7ag: (2S,4S)-2-(*p*-tolyl)chroman-4-ol.** White solid, 90% yield, 99% *ee*, 21/1 *dr*. <sup>1</sup>H NMR (400 MHz, Methanol-*d*<sub>4</sub>) δ 7.52 – 6.80 (m, 8H), 5.14 (dd, *J* = 12.0, 1.8 Hz, 1H), 5.08 (dd, *J* = 10.9, 6.2 Hz, 1H), 2.42 – 2.37 (m, 4H), 2.05 (ddd, *J* = 13.0, 12.0, 10.9 Hz, 1H). <sup>13</sup>C NMR (100 MHz, Methanol-*d*<sub>4</sub>) δ 154.65, 138.16, 137.48, 128.69, 128.20, 126.77, 126.24, 125.74, 120.23, 115.90, 76.88, 64.91, 39.71, 19.81. HRMS (APCI): *m/z* [M-OH<sup>+</sup>] calcd. for C<sub>16</sub>H<sub>15</sub>O<sup>+</sup> 223.11174; found 223.11207. HPLC (Chiralpak AD-H, elute: Hexanes/*i*-PrOH = 95/5, detector: 210 nm, flow rate: 1.0 mL/min, 25 °C).

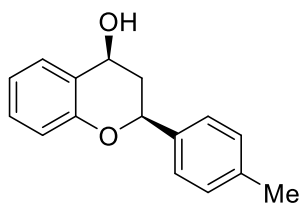

**7ah: (2S,4S)-2-(*m*-tolyl)chroman-4-ol.** White solid, 83% yield, 99% *ee*, 20/1 *dr*. <sup>1</sup>H NMR (400 MHz, Methanol-*d*<sub>4</sub>) δ 7.51 – 6.79 (m, 8H), 5.03 (ddd, *J* = 12.7, 10.1, 4.0 Hz, 2H), 2.38 – 2.33 (m, 4H), 2.02 (ddd, *J* = 13.0, 12.1, 10.9 Hz, 1H). <sup>13</sup>C NMR (100 MHz, Methanol-*d*<sub>4</sub>) δ 158.56, 144.99, 141.83, 132.27 (d, *J* = 8.0 Hz), 132.04, 130.79, 130.37, 130.20, 126.83, 124.28, 119.95, 80.95, 68.86, 43.70, 24.20. HRMS (APCI) calcd. for [M-OH<sup>+</sup>]: C<sub>16</sub>H<sub>15</sub>O<sup>+</sup> 223.11174 found 223.11210. HPLC (Chiralpak AD-H, elute: Hexanes/*i*-PrOH = 95/5, detector: 210 nm, flow rate: 1.0 mL/min, 25 °C).

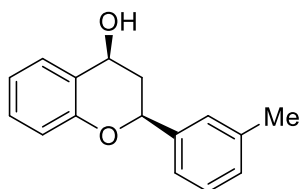

**7ai: (2*S*,4*S*)-2-(*o*-tolyl)chroman-4-ol.** White solid, 80% yield, 99% *ee*, 25/1 *dr*. <sup>1</sup>H NMR (400 MHz, Methanol-*d*<sub>4</sub>) δ 7.54 – 6.16 (m, 6H), 6.98 – 6.81 (m, 2H), 5.38 (d, *J* = 10.2 Hz, 1H), 5.09 (dd, *J* = 10.9, 6.2 Hz, 1H), 2.41 – 2.37 (m, 4H), 2.05 (ddd, *J* = 13.0, 11.9, 10.9 Hz, 1H). <sup>13</sup>C NMR (100 MHz, Methanol-*d*<sub>4</sub>) δ 154.73, 138.79, 134.75, 130.13, 128.24, 127.50, 126.86, 126.33, 125.87, 125.32, 120.31, 115.95, 74.01, 65.00, 38.14, 17.68. HRMS (APCI): *m/z* [M-OH<sup>+</sup>] calcd. for C<sub>16</sub>H<sub>15</sub>O<sup>+</sup> 223.11174; found 223.11112. HPLC (Chiralpak AD-H, elute: Hexanes/*i*-PrOH = 97/3, detector: 210 nm, flow rate: 1.0 mL/min, 25 °C).

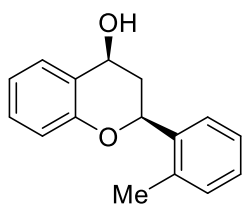

**7aj: (2*S*,4*S*)-2-(4-methoxyphenyl)chroman-4-ol.** White solid, 85% yield, 99% *ee*, 35/1 *dr*. <sup>1</sup>H NMR (400 MHz, Methanol-*d*<sub>4</sub>) δ 7.28 – 6.78 (m, 8H), 5.14 – 5.05 (m, 2H), 3.82 (s, 3H), 2.41 – 2.03 (m, 2H). <sup>13</sup>C NMR (100 MHz, Methanol-*d*<sub>4</sub>) δ 159.61, 154.68, 133.14, 128.19, 127.17, 126.78, 126.22, 120.22, 115.89, 113.45, 76.71, 64.95, 54.32, 39.56. HRMS(APCI) calcd. for [M-OH<sup>+</sup>]: C<sub>16</sub>H<sub>15</sub>O<sub>2</sub><sup>+</sup> 239.10666 found 239.10698. HPLC (Chiralpak AD-H, elute: Hexanes/*i*-PrOH = 97/3, detector: 210 nm, flow rate: 1.0 mL/min, 25 °C).

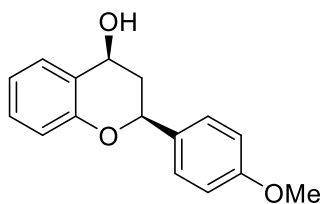

**7ak: (2*S*,4*S*)-2-(3-methoxyphenyl)chroman-4-ol.** White solid, 83% yield, 99% *ee*, 21/1 *dr*. <sup>1</sup>H NMR (400 MHz, Methanol-*d*<sub>4</sub>) δ 7.47 – 6.76 (m, 8H), 5.12– 5.03 (m, 2H), 3.80 (d, *J* = 1.4 Hz, 3H), 2.40 – 2.00(m, 2H). <sup>13</sup>C NMR (101 MHz, Methanol-*d*<sub>4</sub>) δ 160.58, 155.65, 134.11, 129.16, 128.13, 127.74, 127.19, 121.18, 116.86, 114.41, 77.67, 65.92, 55.29, 40.53. HRMS (APCI): *m/z* [M-OH<sup>+</sup>] calcd. for C<sub>16</sub>H<sub>15</sub>O<sub>2</sub><sup>+</sup> 239.10666; found 239.10522. HPLC (Chiralpak AD-H, elute: Hexanes/*i*-PrOH = 95/5, detector: 210 nm, flow rate: 1.0 mL/min, 25 °C).

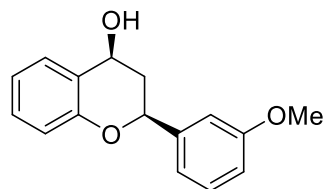

**7al: (2*S*,4*S*)-2-(2-methoxyphenyl)chroman-4-ol.** White solid, 79% yield, 99% *ee*, >50/1 *dr*. <sup>1</sup>H NMR (400 MHz, Methanol-*d*<sub>4</sub>) δ 7.54 – 7.47 (m, 2H), 7.22 (dtd, *J* = 62.1, 7.8, 1.7 Hz, 2H), 7.00 – 7.00 (m, 4H), 5.49 (dd, *J* = 11.7, 1.7 Hz, 1H), 5.03 (dd, *J* = 11.0, 6.2 Hz, 1H), 3.86 (s, 3H), 2.46 (ddd, *J* = 12.8, 6.2, 1.8 Hz, 1H), 1.88 (dt, *J* = 12.8, 11.3 Hz, 1H). <sup>13</sup>C NMR (100 MHz, Methanol-*d*<sub>4</sub>) δ 155.93, 154.77, 129.23, 128.49, 128.17, 126.79, 126.36, 125.80, 120.33, 120.19, 115.95, 110.21, 71.56, 64.93, 54.55, 38.34. HRMS (APCI): *m/z* [M-OH<sup>+</sup>] calcd. for C<sub>16</sub>H<sub>15</sub>O<sub>2</sub><sup>+</sup> 239.10666; found 239.10588. HPLC (Chiralpak AD-H, elute: Hexanes/*i*-PrOH = 95/5, detector: 210 nm, flow rate: 1.0 mL/min, 25 °C).

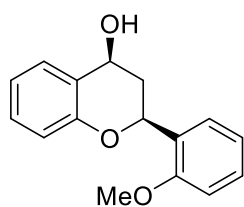

**7am: (2*S*,4*S*)-2-(furan-2-yl)chroman-4-ol.** White solid, 86% yield, 99% *ee*, >50/1 *dr*. <sup>1</sup>H NMR (400 MHz, Methanol-*d*<sub>4</sub>) δ 7.52 – 6.42 (m, 7H), 5.19 (dd, *J* = 12.1, 1.9 Hz, 1H), 5.01 (dd, *J* = 10.9, 6.3 Hz, 1H), 2.30 – 2.21 (m, 2H). <sup>13</sup>C NMR (100 MHz, Methanol-*d*<sub>4</sub>) δ 155.79, 154.98, 144.28, 130.07, 128.62, 127.84, 122.22, 117.66, 111.75, 109.09, 71.82, 66.18, 37.24. HRMS (APCI): *m/z* [M-OH<sup>+</sup>] calcd. for C<sub>13</sub>H<sub>11</sub>O<sub>2</sub><sup>+</sup> 199.07536; found 199.07475. HPLC (Chiralpak AD-H, elute: Hexanes/*i*-PrOH = 97/3, detector: 210 nm, flow rate: 1.0 mL/min, 25 °C).

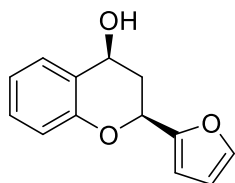

**7an: (2*S*,4*S*)-2-(thiophen-2-yl)chroman-4-ol.** White solid, 85% yield, 99% *ee*, >50/1 *dr*. <sup>1</sup>H NMR (400 MHz, Methanol-*d*<sub>4</sub>) δ 7.52 – 6.80 (m, 8H), 5.16 – 5.05 (m, 2H), 2.42 – 2.37 (m, 4H), 2.05 (ddd, *J* = 13.0, 12.0, 10.9 Hz, 1H). <sup>13</sup>C NMR (100 MHz, Methanol-*d*<sub>4</sub>) δ 154.15, 143.94, 128.26, 126.82, 126.15, 126.10, 124.82, 124.43, 120.50, 115.89, 72.78, 64.51, 39.79. HRMS (APCI): *m/z* [M-OH<sup>+</sup>] calcd. for C<sub>13</sub>H<sub>11</sub>OS<sup>+</sup> 215.05251; found 215.05165. HPLC (Chiralpak AD-H, elute: Hexanes/*i*-PrOH = 95/5, detector: 210 nm, flow rate: 1.0 mL/min, 25 °C).

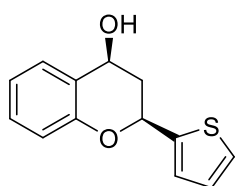

**7ao: (2*S*,4*S*)-6-fluoro-2-phenylchroman-4-ol.** White solid, 88% yield, 99% *ee*, >50/1 *dr*. <sup>1</sup>H NMR (400 MHz, Methanol-*d*<sub>4</sub>) δ 7.46 – 6.78 (m, 8H), 5.17 – 5.01 (m, 2H), 2.39 – 1.96 (m, 2H). <sup>13</sup>C NMR (100 MHz, Methanol-*d*<sub>4</sub>) δ 162.33, 159.98, 154.60 (d, *J* = 2.1 Hz), 144.90, 132.09, 131.67 (d, *J* = 4.7 Hz), 129.65, 121.07 (d, *J* = 7.9 Hz), 118.75 (d, *J* = 23.6 Hz), 116.57 (d, *J* = 23.7 Hz), 81.07, 68.68, 43.30. HRMS (APCI): *m/z* [M-OH<sup>+</sup>] calcd. for C<sub>15</sub>H<sub>12</sub>OF<sup>+</sup> 227.08667; found 227.08701. HPLC (Chiralpak AD-H, elute: Hexanes/*i*-PrOH = 95/5, detector: 210 nm, flow rate: 1.0 mL/min, 25 °C).

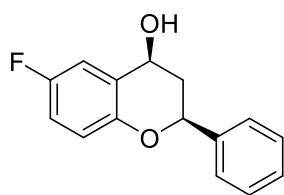

**7ap: (2*S*,4*S*)-6-chloro-2-phenylchroman-4-ol.** White solid, 85% yield, 99% *ee*, 37/1 *dr*. <sup>1</sup>H NMR (400 MHz, Methanol-*d*<sub>4</sub>) δ 7.47 – 6.78 (m, 8H), 5.18 (dd, *J* = 12.0, 1.8 Hz, 1H), 5.03 (ddt, *J* = 11.0, 6.2, 1.0 Hz, 1H), 2.42 – 1.96 (m, 2H). <sup>13</sup>C NMR (100 MHz, Methanol-*d*<sub>4</sub>) δ 157.22, 144.71, 132.18, 132.11, 132.05, 131.71, 130.45, 129.66, 129.07, 121.51, 81.18, 68.49, 43.18. HRMS (APCI): *m/z* [M-OH<sup>+</sup>] calcd. for C<sub>15</sub>H<sub>12</sub>OCl<sup>+</sup> 243.05712; found 243.05721. HPLC (Chiralpak AD-H, elute: Hexanes/*i*-PrOH = 95/5, detector: 210 nm, flow rate: 1.0 mL/min, 25 °C).

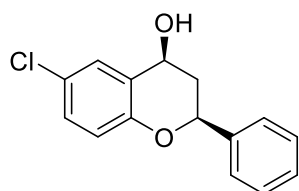

**7aq: (2S,4S)-6-bromo-2-phenylchroman-4-ol.** White solid, 83% yield, 99% *ee*, 28/1 *dr*. <sup>1</sup>H NMR (400 MHz, Methanol-*d*<sub>4</sub>) δ 7.61 (d, *J* = 2.4 Hz, 1H), 7.42 – 6.72 (m, 8H), 5.15 (dd, *J* = 12.1, 1.8 Hz, 1H), 5.01 (dd, *J* = 11.0, 6.2 Hz, 1H), 2.00 (dd, *J* = 12.2, 1.5 Hz, 2H). <sup>13</sup>C NMR (101 MHz, Methanol-*d*<sub>4</sub>) δ 153.76, 140.70, 131.08, 129.55, 128.74, 128.20, 127.80, 125.75, 118.04, 112.31, 77.24, 64.51, 39.17. HRMS (APCI): *m/z* [M-OH<sup>+</sup>] calcd. for C<sub>15</sub>H<sub>12</sub>OBr<sup>+</sup> 287.00660; found 287.00711. HPLC (Chiralpak AD-H, elute: Hexanes/*i*-PrOH = 95/5, detector: 210 nm, flow rate: 1.0 mL/min, 25 °C).

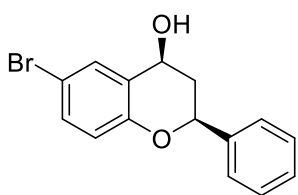

**7ar: (2S,4S)-6-methyl-2-phenylchroman-4-ol.** White solid, 73% yield, 99% *ee*, 46/1 *dr*. <sup>1</sup>H NMR (400 MHz, Methanol-*d*<sub>4</sub>) δ 7.48 – 6.71 (m, 8H), 5.12 – 5.02 (m, 2H), 2.39 (ddd, *J* = 12.9, 6.3, 1.8 Hz, 1H), 2.29 (s, 3H), 2.03 (ddd, *J* = 13.0, 12.0, 10.8 Hz, 1H). <sup>13</sup>C NMR (100 MHz, Methanol-*d*<sub>4</sub>) δ 152.40, 141.28, 129.51, 128.84, 128.12, 127.60, 127.02, 125.80, 125.74, 115.75, 76.87, 64.93, 39.91, 19.40. HRMS (APCI): *m/z* [M-OH<sup>+</sup>] calcd. for C<sub>16</sub>H<sub>15</sub>O<sup>+</sup> 223.11174; found 223.11115. HPLC (Chiralpak AD-H, elute: Hexanes/*i*-PrOH = 97/3, detector: 210 nm, flow rate: 1.0 mL/min, 25 °C).

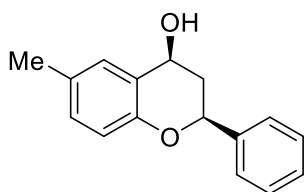

**7as: (2S,4S)-6-fluoro-2-(4-fluorophenyl)chroman-4-ol.** White solid, 89% yield, 99% *ee*, 23/1 *dr*. <sup>1</sup>H NMR (400 MHz, Methanol-*d*<sub>4</sub>) δ 7.49 – 6.78 (m, 7H), 5.16 – 5.02 (m, 2H), 2.42 – 1.96 (m, 2H). <sup>13</sup>C NMR (100 MHz, Methanol-*d*<sub>4</sub>) δ 165.08, 162.64, 159.81, 157.45, 151.91 (d, *J* = 2.1 Hz), 138.35 (d, *J* = 3.2 Hz), 129.08, 118.53 (d, *J* = 7.9 Hz), 116.23 (dd, *J* = 22.7, 4.2 Hz), 114.07 (d, *J* = 23.8 Hz), 77.80, 66.04, 40.62. HRMS (APCI): *m/z* [M-OH<sup>+</sup>] calcd. for C<sub>15</sub>H<sub>11</sub>OF<sub>2</sub><sup>+</sup> 245.07725; found 245.07672. HPLC (Chiralpak AD-H, elute: Hexanes/*i*-PrOH = 95/5, detector: 210 nm, flow rate: 1.0 mL/min, 25 °C).

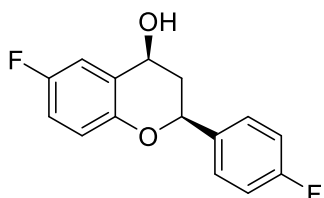

**7at: (2S,4S)-6-fluoro-2-(p-tolyl)chroman-4-ol.** White solid, 95% yield, 99% *ee*, >50/1 *dr*. <sup>1</sup>H NMR (400 MHz, Methanol-*d*<sub>4</sub>) δ 7.35 – 7.19 (m, 5H), 6.92 – 6.76 (m, 2H), 5.12 (dd, *J* = 12.0, 1.8 Hz, 1H), 5.08 – 4.99 (m, 1H), 2.41 – 2.36 (m, 4H), 2.02 (ddd, *J* = 13.0, 12.0, 10.9 Hz, 1H). <sup>13</sup>C NMR (100 MHz, Methanol-*d*<sub>4</sub>) δ 158.36, 156.00, 150.73 (d, *J* = 2.0 Hz), 137.75 (d, *J* = 38.5 Hz), 128.72, 127.74, 125.73, 117.06, 114.78 (d, *J* = 23.7 Hz), 112.62 (d, *J* = 23.9 Hz), 77.05, 64.78, 39.26, 19.82. HRMS (APCI): *m/z* [M-OH<sup>+</sup>] calcd. for C<sub>16</sub>H<sub>14</sub>OF<sup>+</sup> 241.10232; found 241.10170. HPLC (Chiralpak AD-H, elute: Hexanes/*i*-PrOH = 95/5, detector: 210 nm, flow rate: 1.0 mL/min, 25 °C).

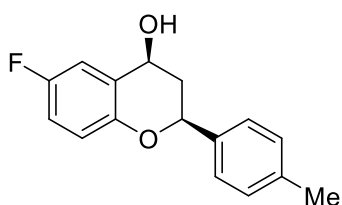



**7au: (2S,4S)-2-(3,4-difluorophenyl)-6-methylchroman-4-ol.** White solid, 76% yield,

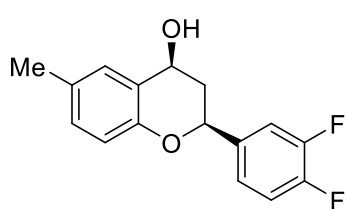

99% *ee*, 36/1 *dr*.  $^1\text{H}$  NMR (400 MHz, Methanol- $d_4$ )  $\delta$  7.41 – 6.70 (m, 6H), 5.14 – 5.00 (m, 2H), 2.40 (ddd,  $J$  = 13.0, 6.3, 1.9 Hz, 1H), 2.27 (s, 3H), 1.99 – 1.90 (m, 1H).

$^{13}\text{C}$  NMR (100 MHz, Methanol- $d_4$ )  $\delta$  155.95, 155.30 (d,  $J$  = 12.8 Hz), 154.81 (d,  $J$  = 12.7 Hz), 152.85 (d,  $J$  = 12.7

Hz), 152.36 (d,  $J$  = 12.7 Hz), 142.87 (dd,  $J$  = 5.6, 3.8 Hz), 133.72, 132.83, 130.97, 129.66, 126.08 (dd,  $J$  = 6.5, 3.6 Hz), 120.91, 79.45 (d,  $J$  = 1.5 Hz), 68.59, 43.67, 23.29. HRMS (APCI):  $m/z$  [M-OH $^+$ ] calcd. for  $\text{C}_{16}\text{H}_{13}\text{OF}_2^+$  259.09290; found 259.09218. HPLC (Chiralpak AD-H, elute: Hexanes/*i*-PrOH = 97/3, detector: 210 nm, flow rate: 1.0 mL/min, 25  $^\circ\text{C}$ ).

**7ba: (2R,4S)-2-methylchroman-4-ol.** White solid, 82% yield, 99% *ee*, >50/1 *dr*.  $^1\text{H}$

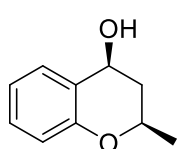

NMR (400 MHz, Methanol- $d_4$ )  $\delta$  7.46 – 6.71 (m, 4H), 4.88 (d,  $J$  = 7.4 Hz, 1H), 4.25 (dq,  $J$  = 12.6, 6.3, 1.7 Hz, 1H), 2.26 (ddd,  $J$  = 12.9, 6.4, 1.7 Hz, 1H), 1.71 (dt,  $J$  = 12.9, 11.2 Hz, 1H), 1.40 (d,  $J$  = 6.3 Hz, 3H).

$^{13}\text{C}$  NMR (100 MHz, Methanol- $d_4$ )  $\delta$  154.57, 128.05, 126.84, 126.04,

119.89, 115.71, 71.15, 64.48, 39.06, 20.44. HRMS (APCI):  $m/z$  [M-OH $^+$ ] calcd. for  $\text{C}_{10}\text{H}_{11}\text{O}^+$  147.08044; found 147.08010. HPLC (Chiralpak AD-H, elute: Hexanes/*i*-PrOH = 97/3, detector: 210 nm, flow rate: 1.0 mL/min, 25  $^\circ\text{C}$ ).

**7bb: (2R,4S)-2-ethylchroman-4-ol.** White solid, 81% yield, 99% *ee*, >50/1 *dr*.  $^1\text{H}$

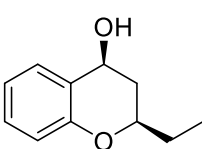

NMR (400 MHz, Methanol- $d_4$ )  $\delta$  7.45 – 6.72 (m, 4H), 4.88 (d,  $J$  = 6.5 Hz, 1H), 2.25 (ddd,  $J$  = 12.8, 6.3, 1.7 Hz, 1H), 2.25 (ddd,  $J$  = 12.8, 6.3, 1.7 Hz, 1H), 1.85 – 1.65 (m, 3H), 1.07 (t,  $J$  = 7.5 Hz, 3H).

$^{13}\text{C}$  NMR (100 MHz, Methanol- $d_4$ )  $\delta$  154.62, 128.06, 126.80, 126.30,

119.83, 115.73, 76.04, 64.64, 36.84, 28.24, 8.39. HRMS (APCI):  $m/z$  [M-OH $^+$ ] calcd. for  $\text{C}_{11}\text{H}_{13}\text{O}^+$  161.09609; found 161.09570. HPLC (Chiralpak AD-H, elute: Hexanes/*i*-PrOH = 99/1, detector: 210 nm, flow rate: 1.0 mL/min, 25  $^\circ\text{C}$ ).

**7bc: (2R,4S)-2-propylchroman-4-ol.** White solid, 85% yield, 99% *ee*, >50/1 *dr*.  $^1\text{H}$

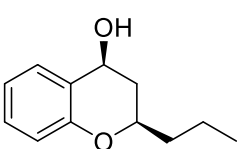

NMR (400 MHz, Methanol- $d_4$ )  $\delta$  7.45 – 6.71 (m, 4H), 4.88 (d,  $J$  = 6.5 Hz, 1H), 4.12 (dddd,  $J$  = 11.6, 7.6, 4.5, 1.7 Hz, 1H), 2.24 (ddd,  $J$  = 12.9, 6.3, 1.7 Hz, 1H), 1.80 – 1.45 (m, 5H), 1.01 (t,  $J$  = 7.1 Hz, 3H).  $^{13}\text{C}$  NMR (100 MHz, Methanol- $d_4$ )  $\delta$  154.60, 128.05,

126.82, 126.29, 119.83, 115.74, 74.57, 64.61, 37.57, 37.34, 17.99, 12.99. HRMS (APCI):  $m/z$  [M-OH $^+$ ] calcd. for  $\text{C}_{12}\text{H}_{15}\text{O}^+$  175.11174; Found 175.11104. HPLC (Chiralpak AD-H, elute: Hexanes/*i*-PrOH = 99/1, detector: 210 nm, flow rate: 1.0 mL/min, 25  $^\circ\text{C}$ ).

**7bd: (2S,4S)-2-isopropylchroman-4-ol.** White solid, 83% yield, 99% *ee*, 19/1 *dr*. <sup>1</sup>H

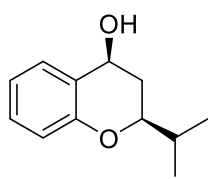

NMR (400 MHz, Methanol-*d*<sub>4</sub>) δ 7.45 – 6.72 (m, 4H), 3.89 (ddd, *J* = 11.7, 5.4, 1.6 Hz, 1H), 2.23 (ddd, *J* = 12.8, 6.3, 1.6 Hz, 1H), 1.94 (pd, *J* = 6.9, 5.4 Hz, 1H), 1.72 (dt, *J* = 12.6, 11.2 Hz, 1H), 1.06 (t, *J* = 6.7 Hz, 6H). <sup>13</sup>C NMR (100 MHz, Methanol-*d*<sub>4</sub>) δ 154.77, 128.04, 126.65, 126.40, 119.75, 115.70, 79.45, 65.01, 34.03, 32.31, 17.07, 16.66. HRMS (APCI): *m/z* [M-OH<sup>+</sup>] calcd. for C<sub>12</sub>H<sub>14</sub>O<sup>+</sup> 175.1117; found 175.1119. HPLC (Chiralpak AD-H, elute: Hexanes/*i*-PrOH = 95/5, detector: 210 nm, flow rate: 1.0 mL/min, 25 °C).

**7be: (2R,4S)-2-isobutylchroman-4-ol.** White solid, 88% yield, 99% *ee*, >50/1 *dr*. <sup>1</sup>H

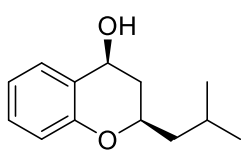

NMR (400 MHz, Methanol-*d*<sub>4</sub>) δ 7.45 – 6.71 (m, 4H), 4.91 (d, *J* = 6.7 Hz, 1H), 4.19 (dddd, *J* = 11.3, 8.7, 4.5, 1.7 Hz, 1H), 2.23 (ddd, *J* = 12.9, 6.4, 1.7 Hz, 1H), 2.04 – 1.91 (m, 1H), 1.76 – 1.66 (m, 2H), 1.46 – 1.39 (m, 1H), 1.00 (dd, *J* = 6.7, 3.7 Hz, 6H). <sup>13</sup>C NMR (100 MHz, Methanol-*d*<sub>4</sub>) δ 154.56, 128.05, 126.87, 126.30, 119.87, 115.77, 73.04, 64.54, 44.59, 37.88, 24.05, 22.26, 21.19. HRMS (APCI): *m/z* [M-OH<sup>+</sup>] calcd. for C<sub>13</sub>H<sub>17</sub>O<sup>+</sup> 189.12739; found 189.12656. HPLC (Chiralpak AD-H, elute: Hexanes/*i*-PrOH = 97/3, detector: 210 nm, flow rate: 1.0 mL/min, 25 °C).

**7bf: (2S,4S)-2-(tert-butyl)-chroman-4-ol.** White solid, 95% yield, 99% *ee*, >50/1

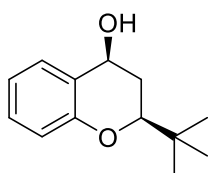

*dr*. <sup>1</sup>H NMR (400 MHz, Methanol-*d*<sub>4</sub>) δ 7.45 – 6.72 (m, 1H), 4.87 (s, 4H), 3.75 (dd, *J* = 12.0, 1.5 Hz, 1H), 2.27 (ddd, *J* = 12.6, 6.2, 1.5 Hz, 1H), 1.68 (td, *J* = 12.3, 11.0 Hz, 1H), 1.04 (s, 9H). <sup>13</sup>C NMR (100 MHz, Methanol-*d*<sub>4</sub>) δ 154.95, 128.05, 126.47, 126.44, 119.71, 115.67, 82.31, 65.43, 33.49, 32.23, 24.70. HRMS (APCI): *m/z* [M-OH<sup>+</sup>] calcd. for C<sub>13</sub>H<sub>17</sub>O<sup>+</sup> 189.12739; found 189.12626. HPLC (Chiralpak AD-H, elute: Hexanes/*i*-PrOH = 99/1, detector: 210 nm, flow rate: 1.0 mL/min, 25 °C).

**7bg: (2R,4S)-6-chloro-2-methylchroman-4-ol.** White solid, 91% yield, 99% *ee*, 35/1

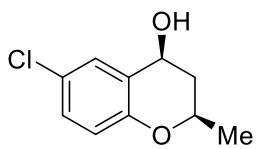

*dr*. <sup>1</sup>H NMR (400 MHz, Methanol-*d*<sub>4</sub>) δ 7.42 – 6.70 (m, 3H), 4.85 (dd, *J* = 11.2, 6.6 Hz, 1H), 4.26 (dd, *J* = 5.2, 1.7 Hz, 1H), 2.28 – 1.63 (m, 2H), 1.40 (d, *J* = 6.3 Hz, 3H). <sup>13</sup>C NMR (100 MHz, Methanol-*d*<sub>4</sub>) δ 153.30, 128.03, 127.93, 126.55, 124.68, 117.33, 71.54, 64.17, 38.54, 20.32. HRMS (APCI): *m/z* [M-OH<sup>+</sup>] calcd. for C<sub>10</sub>H<sub>9</sub>OCl<sup>+</sup> 181.0415; found 181.0418. HPLC (Chiralpak AD-H, elute: Hexanes/*i*-PrOH = 95/5, detector: 210 nm, flow rate: 1.0 mL/min, 25 °C).

**7bh: (2S,4S)-6-chloro-2-isopropylchroman-4-ol.** White solid, 87% yield, 99% *ee*,

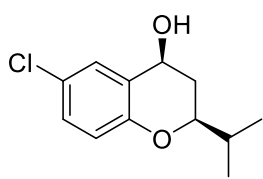

45/1 *dr*.  $^1\text{H}$  NMR (400 MHz, Methanol- $d_4$ )  $\delta$  7.41 – 6.71 (m, 3H), 4.84 (ddt,  $J$  = 11.0, 6.2, 1.0 Hz, 1H), 3.91 (ddd,  $J$  = 11.8, 5.4, 1.6 Hz, 1H), 2.22 (ddd,  $J$  = 12.8, 6.2, 1.7 Hz, 1H), 1.93 (heptd,  $J$  = 6.8, 5.2 Hz, 1H), 1.69 (ddd,  $J$  = 12.8, 11.8, 10.9 Hz, 1H), 1.05 (dd,  $J$  = 6.9, 5.7 Hz, 6H).  $^{13}\text{C}$  NMR (100 MHz, Methanol- $d_4$ )  $\delta$  153.47, 128.38, 127.92, 126.38, 124.55, 117.30, 79.78, 64.67, 33.57, 32.25, 17.05, 16.57. HRMS (APCI):  $m/z$  [M-OH $^+$ ] calcd. for  $\text{C}_{12}\text{H}_{14}\text{OCl}^+$  209.07277; found 209.07227. HPLC (Chiralpak AD-H, elute: Hexanes/*i*-PrOH = 97/3, detector: 210 nm, flow rate: 1.0 mL/min, 25  $^\circ\text{C}$ ).

**7bi: (2R,4S)-6-chloro-2-isobutylchroman-4-ol.** White solid, 86% yield, 99% *ee*, 21/1

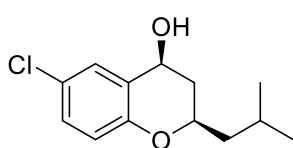

*dr*.  $^1\text{H}$  NMR (400 MHz, Methanol- $d_4$ )  $\delta$  7.42 – 6.70 (m, 3H), 4.87 – 4.84 (m, 1H), 4.21 (dddd,  $J$  = 11.3, 8.6, 4.4, 1.7 Hz, 1H), 2.25 – 2.20 (m, 2H), 1.75 – 1.43 (m, 3H), 0.99 (dd,  $J$  = 6.7, 3.4 Hz, 6H).  $^{13}\text{C}$  NMR (100 MHz, Methanol- $d_4$ )  $\delta$  153.26, 128.29, 127.92, 126.56, 124.65, 117.37, 73.44, 64.22, 44.45, 37.37, 24.03, 22.22, 21.14. HRMS (APCI):  $m/z$  [M-OH $^+$ ] calcd. for  $\text{C}_{13}\text{H}_{15}\text{OCl}^+$  223.0884; found 223.0885. HPLC (Chiralpak AD-H, elute: Hexanes/*i*-PrOH = 95/5, detector: 210 nm, flow rate: 1.0 mL/min, 25  $^\circ\text{C}$ ).

**7bj: (2S,4S)-2-(tert-butyl)-6-chlorochroman-4-ol.** White solid, 93% yield, 99% *ee*, 42/1 *dr*.  $^1\text{H}$  NMR (400 MHz, Methanol- $d_4$ )  $\delta$  7.41 – 6.71 (m, 3H), 4.82 (s, 1H), 3.79

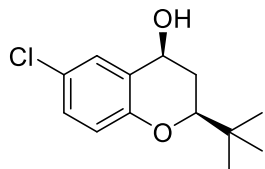

(dd,  $J$  = 12.0, 1.5 Hz, 1H), 2.30 – 1.64 (m, 2H), 1.04 (s, 9H).  $^{13}\text{C}$  NMR (100 MHz, Methanol- $d_4$ )  $\delta$  153.61, 128.42, 127.91, 126.22, 124.52, 117.24, 82.67, 65.04, 33.48, 31.76, 24.59. HRMS (APCI):  $m/z$  [M-OH $^+$ ] calcd. for  $\text{C}_{13}\text{H}_{15}\text{OCl}^+$  223.0884; found 223.0885. HPLC (Chiralpak AD-H, elute: Hexanes/*i*-PrOH = 97/3, detector: 210 nm, flow rate: 1.0 mL/min, 25  $^\circ\text{C}$ ).

**7bk: (2S,4S)-6-bromo-2-isopropylchroman-4-ol** White solid, 85% yield, 99%

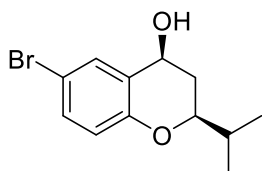

*ee*, 16/1 *dr*.  $^1\text{H}$  NMR (400 MHz, Methanol- $d_4$ )  $\delta$  7.55 – 6.66 (m, 3H), 4.85 (ddt,  $J$  = 11.0, 6.3, 1.0 Hz, 1H), 3.93 – 3.89 (m, 1H), 2.25 (s, 1H), 1.93 (pd,  $J$  = 6.9, 5.4 Hz, 1H), 1.69 (ddd,  $J$  = 12.8, 11.8, 11.0 Hz, 1H), 1.07 – 1.03 (m, 6H).  $^{13}\text{C}$  NMR (100 MHz, Methanol- $d_4$ )  $\delta$  153.96, 130.87, 129.41, 128.93, 117.77, 111.68, 79.79, 64.61, 33.54, 32.25, 17.05, 16.57. HRMS (APCI):  $m/z$  [M-OH $^+$ ] calcd. for  $\text{C}_{12}\text{H}_{14}\text{OBr}^+$  253.02225; found 253.02227. HPLC (Chiralpak AD-H, elute: Hexanes/*i*-PrOH = 97/3, detector: 210 nm, flow rate: 1.0 mL/min, 25  $^\circ\text{C}$ ).

**7bl: (2S,4S)-2-cyclobutylchroman-4-ol.** White solid, 76% yield, 99% *ee*, >50/1 *dr*. <sup>1</sup>H

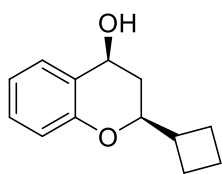

NMR (400 MHz, Methanol-*d*<sub>4</sub>) δ 7.43 – 6.71 (m, 4H), 4.86 – 4.84 (m, 1H), 4.01 (ddd, *J* = 11.5, 7.1, 1.7 Hz, 1H), 2.63 – 2.18 (m, 1H), 2.18 (s, 7H), 1.56 (dt, *J* = 12.8, 11.2 Hz, 1H). <sup>13</sup>C NMR (100 MHz, Methanol-*d*<sub>4</sub>) δ 154.62, 128.07, 126.75, 126.31, 119.79, 115.74, 77.90, 64.56, 39.69, 34.47, 23.77, 23.06, 17.66. HRMS (APCI): *m/z* [M-OH<sup>+</sup>] calcd. for C<sub>13</sub>H<sub>15</sub>O<sup>+</sup> 187.11174; found 187.11112. HPLC (Chiralpak AD-H, elute: Hexanes/*i*-PrOH = 99/1, detector: 210 nm, flow rate: 1.0 mL/min, 25 °C).

**7bm: (2S,4S)-2-cyclopentylchroman-4-ol.** White solid, 81% yield, 99% *ee*, 42/1 *dr*.

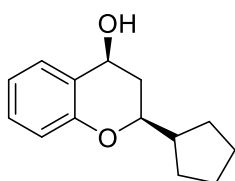

<sup>1</sup>H NMR (400 MHz, Methanol-*d*<sub>4</sub>) δ 7.45 – 6.71 (m, 4H), 4.90 (s, 1H), 3.92 (ddd, *J* = 11.5, 7.4, 1.7 Hz, 1H), 2.31 – 2.09 (m, 2H), 1.94 – 1.40 (m, 9H). <sup>13</sup>C NMR (100 MHz, Methanol-*d*<sub>4</sub>) δ 154.71, 128.05, 126.74, 126.35, 119.75, 115.75, 78.59, 64.69, 44.56, 36.31, 28.21, 25.19 (d, *J* = 3.2 Hz). HRMS (APCI): *m/z* [M-OH<sup>+</sup>] calcd. for C<sub>14</sub>H<sub>17</sub>O<sup>+</sup> 201.12739; found 201.12656. HPLC (Chiralpak AD-H, elute: Hexanes/*i*-PrOH = 97/3, detector: 210 nm, flow rate: 1.0 mL/min, 25 °C).

**7bn: (2S,4S)-2-cyclohexylchroman-4-ol.** White solid, 88% yield, 99% *ee*, 16/1 *dr*. <sup>1</sup>H

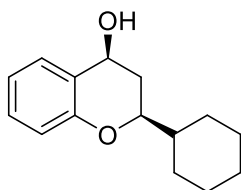

NMR (400 MHz, Methanol-*d*<sub>4</sub>) δ 7.44 – 6.71 (m, 4H), 4.88 – 4.85 (m, 1H), 3.89 (ddd, *J* = 11.7, 5.6, 1.6 Hz, 1H), 2.23 (ddd, *J* = 12.7, 6.2, 1.7 Hz, 1H), 1.98 (dtt, *J* = 13.4, 4.5, 2.3 Hz, 1H), 1.85 – 1.62 (m, 6H), 1.37 – 1.12 (m, 5H). <sup>13</sup>C NMR (100 MHz, Methanol-*d*<sub>4</sub>) δ 154.77, 128.03, 126.67, 126.43, 119.73, 115.71, 78.94, 65.05, 42.32, 34.22, 28.23, 27.91, 26.29, 25.96, 25.89. HRMS (APCI): *m/z* [M-OH<sup>+</sup>] calcd. for C<sub>15</sub>H<sub>19</sub>O<sup>+</sup> 215.14304; found 215.14213. HPLC (Chiralpak AD-H, elute: Hexanes/*i*-PrOH = 97/3, detector: 210 nm, flow rate: 1.0 mL/min, 25 °C).

**7bo: tert-butyl 4-((2S,4S)-7-bromo-4-hydroxychroman-2-yl)piperidine-1-carboxylate.** White solid, 78% yield, 99% *ee*, >50/1 *dr*. <sup>1</sup>H

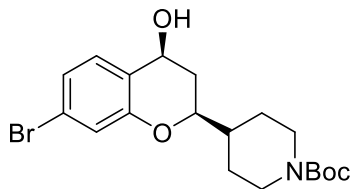

NMR (400 MHz, Methanol-*d*<sub>4</sub>) δ 7.34 (dt, *J* = 8.3, 1.1 Hz, 1H), 7.05 – 6.92 (m, 2H), 4.83 (dd, *J* = 10.7, 6.1 Hz, 1H), 4.17 (d, *J* = 13.3 Hz, 2H), 3.99 (dd, *J* = 11.6, 5.9 Hz, 1H), 2.79 (s, 2H), 2.26 (ddd, *J* = 13.0, 6.1, 1.8 Hz, 1H), 1.95 (d, *J* = 13.1 Hz, 1H), 1.78 – 1.72 (m, 3H), 1.49 (d, *J* = 1.1 Hz, 9H), 1.44 – 1.26 (m, 2H). <sup>13</sup>C NMR (100 MHz, Methanol-*d*<sub>4</sub>) δ 155.33, 155.13, 128.44, 125.92, 123.01, 120.83, 118.65, 79.65, 78.61, 64.33, 40.37, 33.79, 27.35, 27.00. HRMS (APCI): *m/z* [M-OH<sup>+</sup>] calcd. for C<sub>19</sub>H<sub>25</sub>O<sub>3</sub>NBr<sup>+</sup> 394.10123; found 394.10060. HPLC (Chiralpak AD-H, elute: Hexanes/*i*-PrOH = 95/5, detector: 210 nm, flow rate: 1.0 mL/min, 25 °C).

**Figure 1.** DLS traces of **1** (green) and **2** (red) and catalyst **3** (blue) indicated at 25, 45, and 70 °.

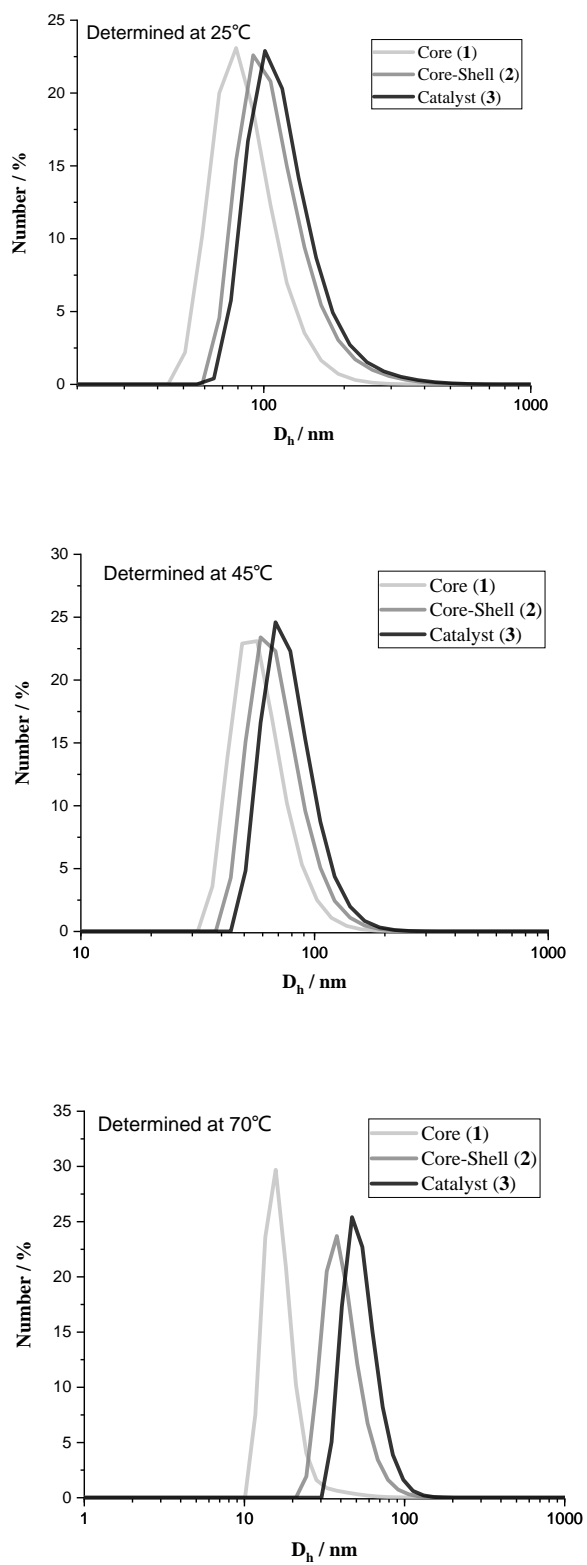

**Figure S2.** Temperature-dependent transmittance of **3** using a turbidity measurement (a) This turbidity measurement was performed on a custom-modified Tepper turbidity photometer TP1-D at a wavelength of 670 nm, a cell path length of 10 mm, and magnetic stirring. The heating program started at a high temperature, and it was cooled to 10 °C at a constant cooling rate of 1.0 °C/min. (b) Temperature-dependent transmittance for the determination of the the volume phase transition temperature (VPTT) as the temperature corresponding to the transmittance decrease at the wavelength of 680 nm).

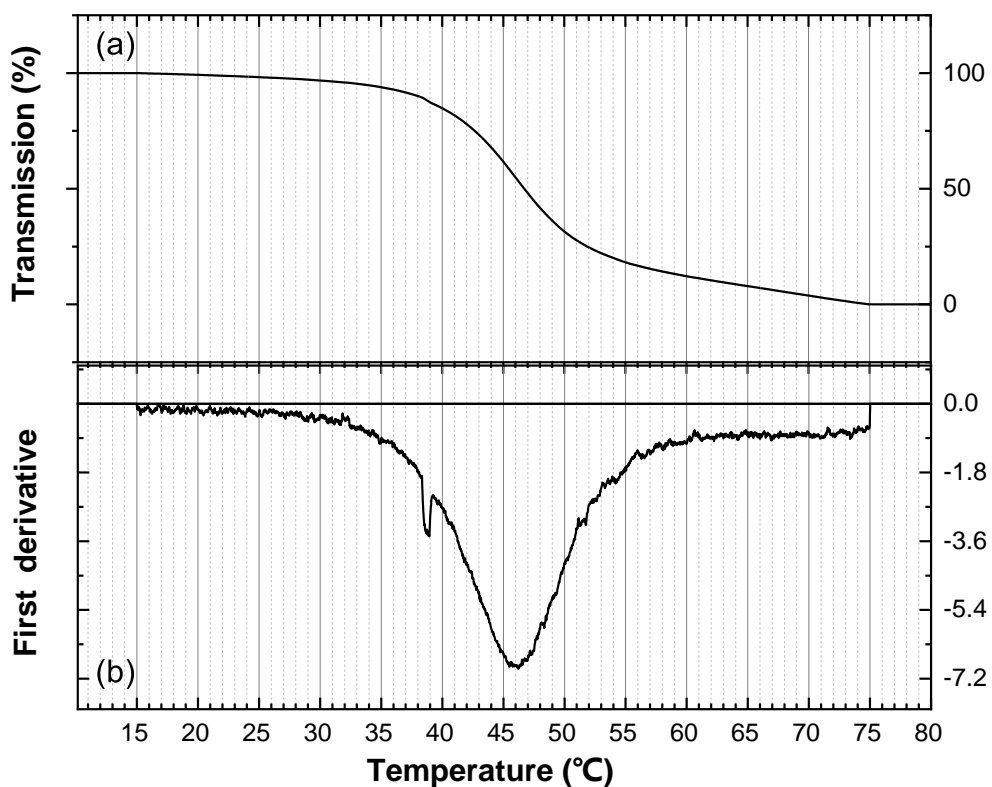

**Figure S3.** The SEM images and dispersive situations of catalyst **3**. (a) The scanning electron microscopy (SEM) images of catalyst **3**. (b) The dispersive situations of catalyst **3** at indicated 25, 40, and 80 °C in H<sub>2</sub>O/PrOH (v/v = 1:3) system.

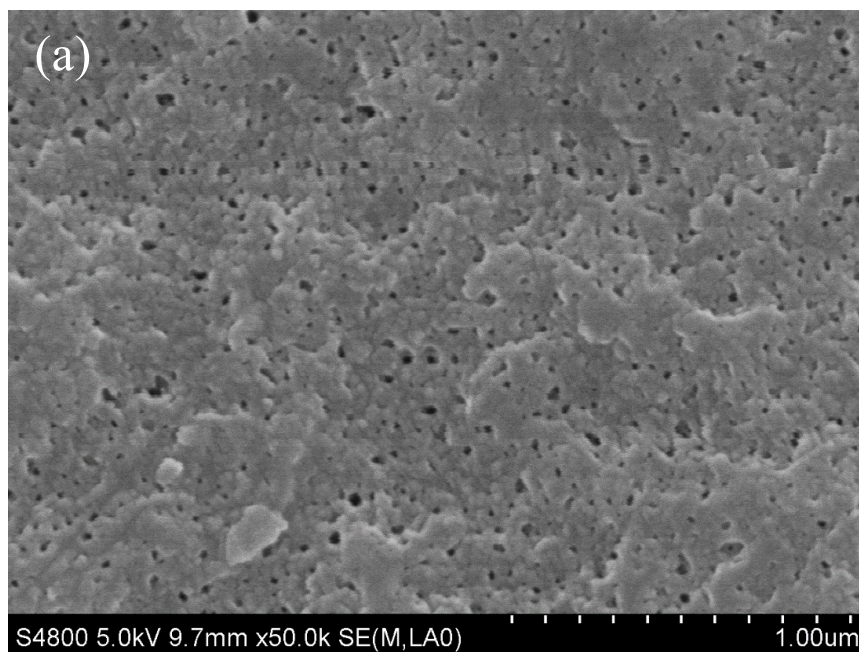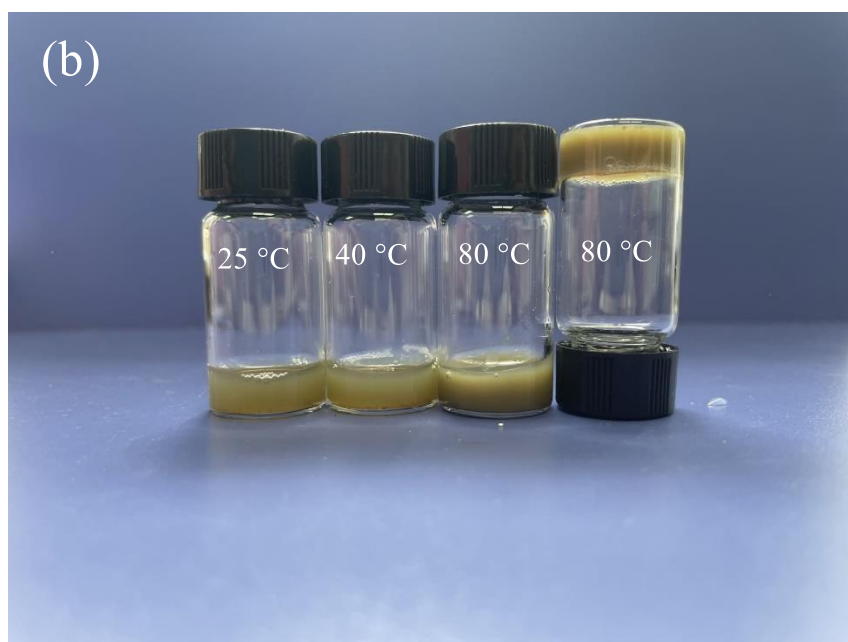

**Figure S4.** The NMR spectra. (a) The liquid-state  $^1\text{H}$ -NMR of **1-2**, catalysts **3** and **3'**.

(b) The solid-state  $^{13}\text{C}$  MAS NMR spectra of **1-2**, and catalysts **3** and **3'**.

(a) The liquid-state  $^1\text{H}$ -NMR of the core (**1**), catalyst **3'**, core-shell (**2**), and catalyst **3**.

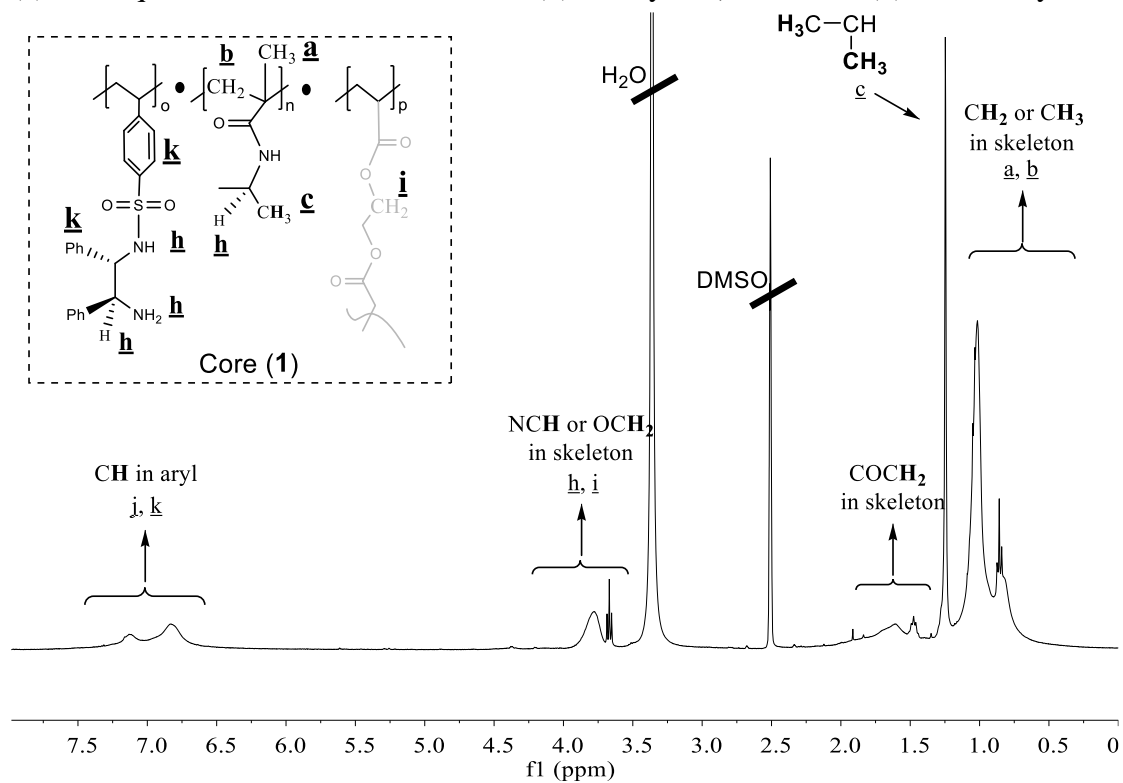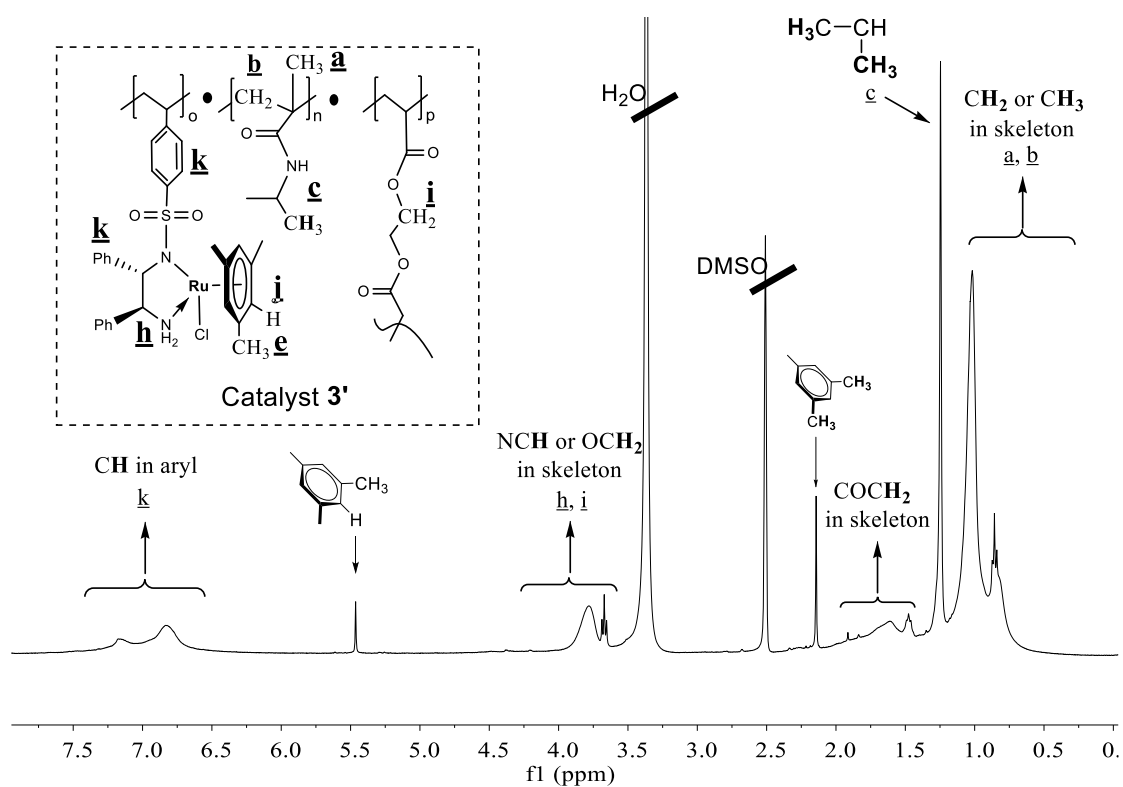



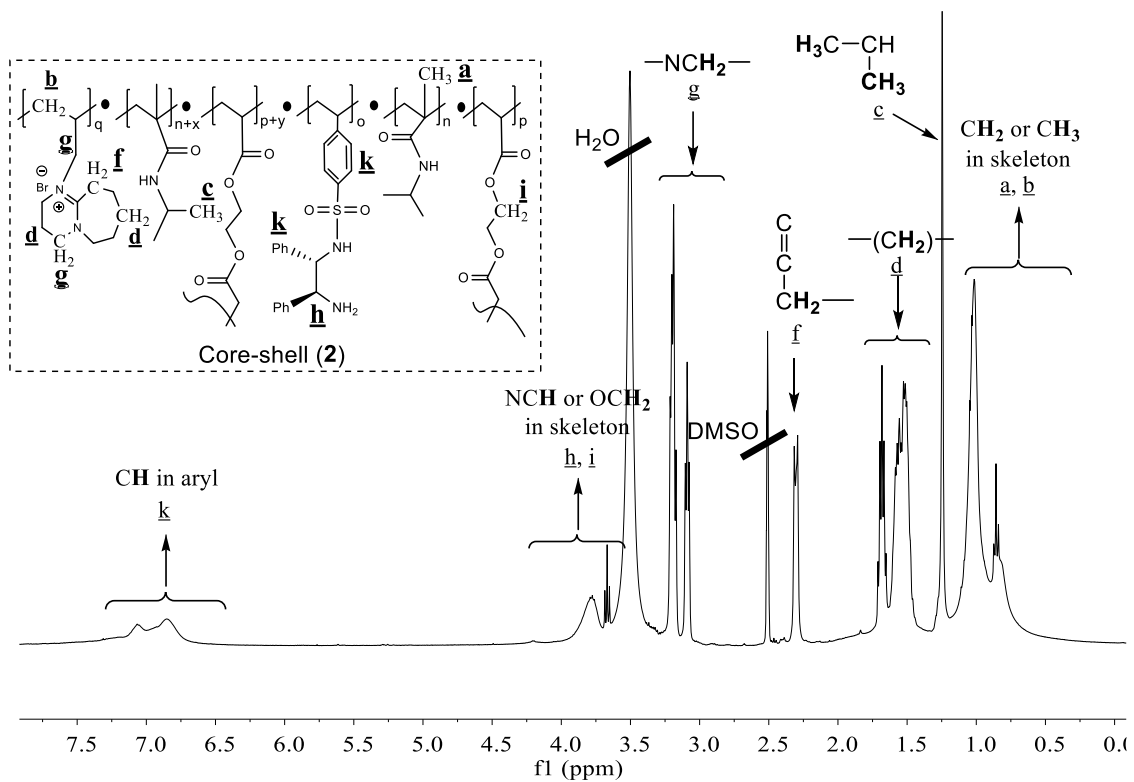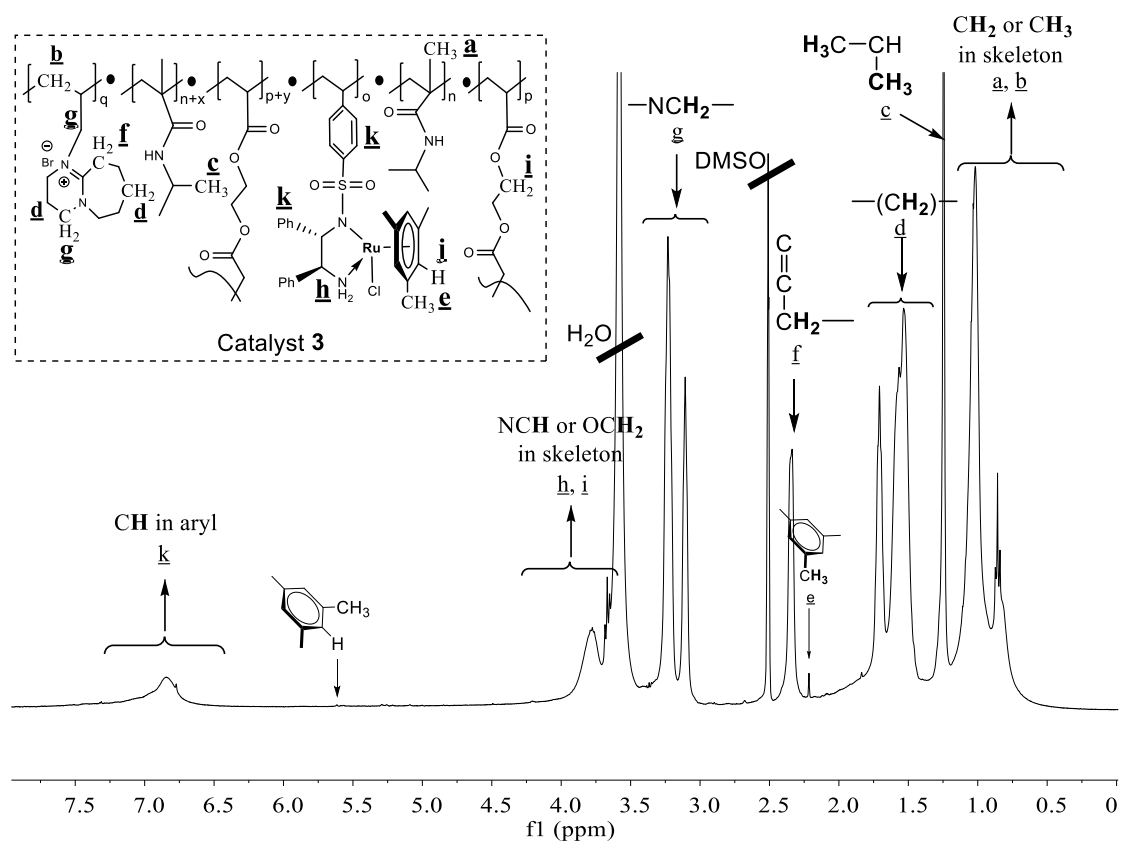

(b) Solid-state  $^{13}\text{C}$  MAS NMR spectra of **1**, **2**, and catalysts **3** and **3'**.

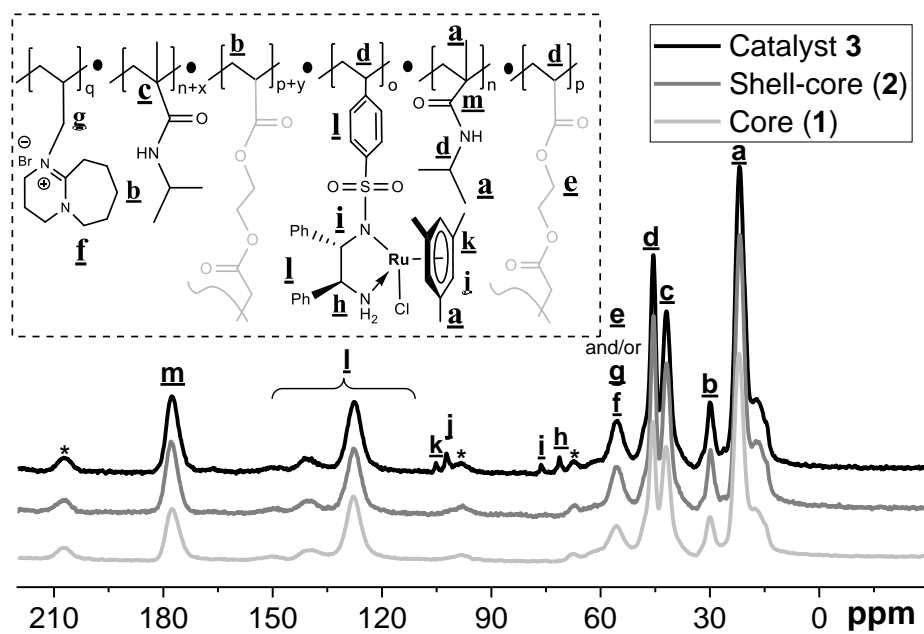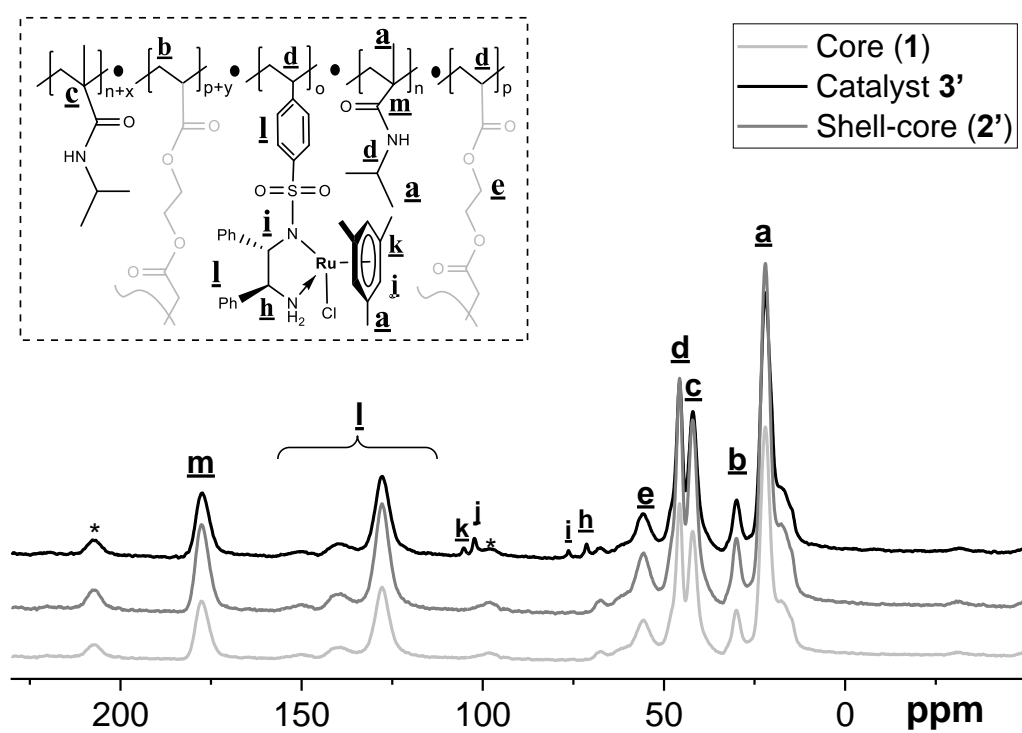

**Figure S5. Average hydrodynamic diameters distribution measurement of 3. Run 1.**

**Results (25 °C for the first run)**

|                                |                      |                           |                             |
|--------------------------------|----------------------|---------------------------|-----------------------------|
| <b>Z-Average (d.nm):</b> 181.4 | <b>Peak 1:</b> 216.0 | <b>% Intensity:</b> 100.0 | <b>St Dev (d.nm):</b> 88.49 |
| <b>Pdl:</b> 0.159              | <b>Peak 2:</b> 0.000 | <b>% Intensity:</b> 0.0   | <b>St Dev (d.nm):</b> 0.000 |
| <b>Intercept:</b> 0.921        | <b>Peak 3:</b> 0.000 | <b>% Intensity:</b> 0.0   | <b>St Dev (d.nm):</b> 0.000 |
| <b>Result quality :</b> Good   |                      |                           |                             |

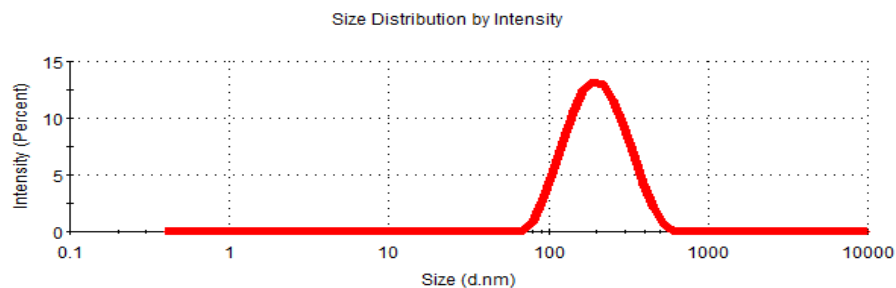

**Results (45 °C for the first run)**

|                                |                      |                           |                             |
|--------------------------------|----------------------|---------------------------|-----------------------------|
| <b>Z-Average (d.nm):</b> 116.7 | <b>Peak 1:</b> 127.8 | <b>% Intensity:</b> 100.0 | <b>St Dev (d.nm):</b> 40.16 |
| <b>Pdl:</b> 0.074              | <b>Peak 2:</b> 0.000 | <b>% Intensity:</b> 0.0   | <b>St Dev (d.nm):</b> 0.000 |
| <b>Intercept:</b> 0.920        | <b>Peak 3:</b> 0.000 | <b>% Intensity:</b> 0.0   | <b>St Dev (d.nm):</b> 0.000 |
| <b>Result quality :</b> Good   |                      |                           |                             |

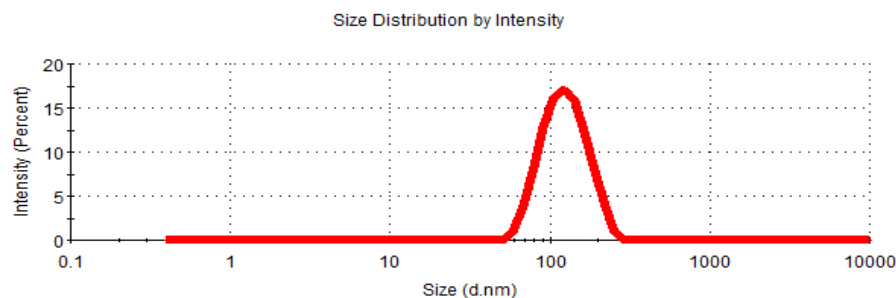

**Results (70 °C for the first run)**

|                                |                      |                           |                             |
|--------------------------------|----------------------|---------------------------|-----------------------------|
| <b>Z-Average (d.nm):</b> 86.24 | <b>Peak 1:</b> 90.51 | <b>% Intensity:</b> 100.0 | <b>St Dev (d.nm):</b> 21.14 |
| <b>Pdl:</b> 0.025              | <b>Peak 2:</b> 0.000 | <b>% Intensity:</b> 0.0   | <b>St Dev (d.nm):</b> 0.000 |
| <b>Intercept:</b> 0.944        | <b>Peak 3:</b> 0.000 | <b>% Intensity:</b> 0.0   | <b>St Dev (d.nm):</b> 0.000 |
| <b>Result quality :</b> Good   |                      |                           |                             |

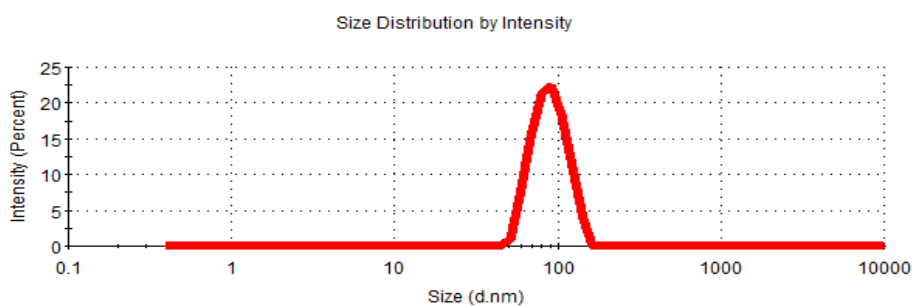

## Run 2.

### Results (25 °C for the second run)

|                                | Size (d.nm):         | % Intensity: | St Dev (d.nm): |
|--------------------------------|----------------------|--------------|----------------|
| <b>Z-Average (d.nm):</b> 182.6 | <b>Peak 1:</b> 217.4 | 100.0        | 83.98          |
| <b>Pdl:</b> 0.168              | <b>Peak 2:</b> 0.000 | 0.0          | 0.000          |
| <b>Intercept:</b> 0.919        | <b>Peak 3:</b> 0.000 | 0.0          | 0.000          |
| <b>Result quality :</b> Good   |                      |              |                |

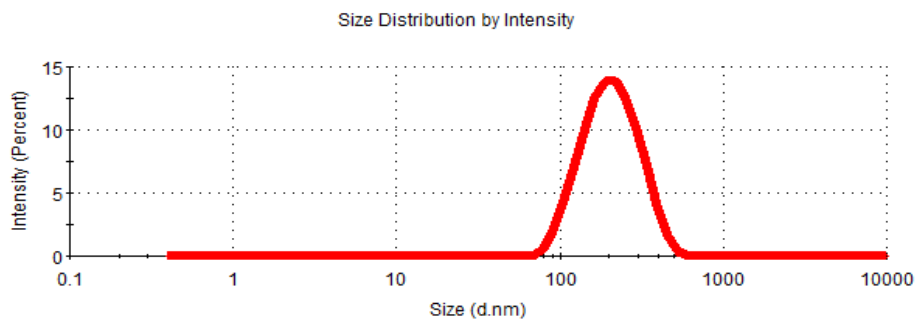

### Results (45 °C for the second run)

|                                | Size (d.nm):         | % Intensity: | St Dev (d.nm): |
|--------------------------------|----------------------|--------------|----------------|
| <b>Z-Average (d.nm):</b> 111.9 | <b>Peak 1:</b> 121.8 | 100.0        | 37.32          |
| <b>Pdl:</b> 0.062              | <b>Peak 2:</b> 0.000 | 0.0          | 0.000          |
| <b>Intercept:</b> 0.883        | <b>Peak 3:</b> 0.000 | 0.0          | 0.000          |
| <b>Result quality :</b> Good   |                      |              |                |

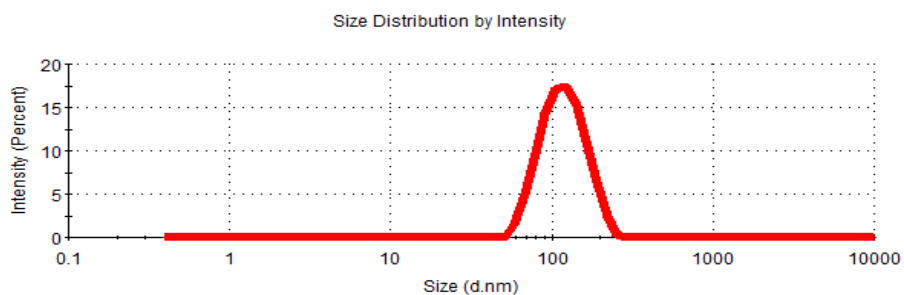

### Results (70 °C for the second run)

|                                | Size (d.nm):         | % Intensity: | St Dev (d.nm): |
|--------------------------------|----------------------|--------------|----------------|
| <b>Z-Average (d.nm):</b> 84.65 | <b>Peak 1:</b> 91.45 | 100.0        | 25.47          |
| <b>Pdl:</b> 0.076              | <b>Peak 2:</b> 0.000 | 0.0          | 0.000          |
| <b>Intercept:</b> 0.939        | <b>Peak 3:</b> 0.000 | 0.0          | 0.000          |
| <b>Result quality :</b> Good   |                      |              |                |

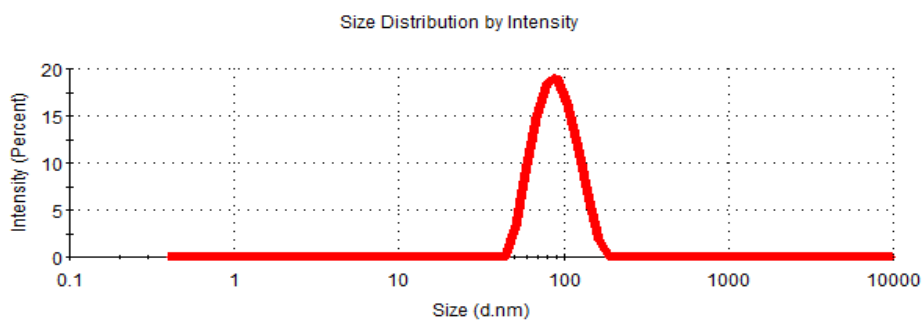

### Run 3. Results (25 °C for the third run)

|                                | Size (d.nm):         | % Intensity: | St Dev (d.nm): |
|--------------------------------|----------------------|--------------|----------------|
| <b>Z-Average (d.nm):</b> 183.7 | <b>Peak 1:</b> 218.7 | 100.0        | 88.33          |
| <b>Pdl:</b> 0.163              | <b>Peak 2:</b> 0.000 | 0.0          | 0.000          |
| <b>Intercept:</b> 0.919        | <b>Peak 3:</b> 0.000 | 0.0          | 0.000          |
| <b>Result quality :</b> Good   |                      |              |                |

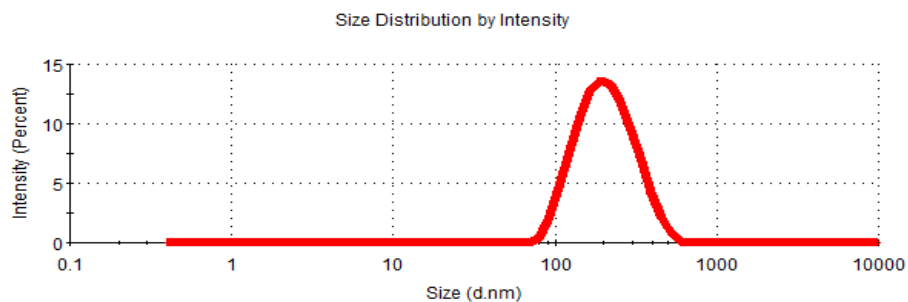

### Results (45 °C for the third run)

|                                | Size (d.nm):         | % Intensity: | St Dev (d.nm): |
|--------------------------------|----------------------|--------------|----------------|
| <b>Z-Average (d.nm):</b> 114.6 | <b>Peak 1:</b> 128.9 | 100.0        | 45.90          |
| <b>Pdl:</b> 0.104              | <b>Peak 2:</b> 0.000 | 0.0          | 0.000          |
| <b>Intercept:</b> 0.880        | <b>Peak 3:</b> 0.000 | 0.0          | 0.000          |
| <b>Result quality :</b> Good   |                      |              |                |

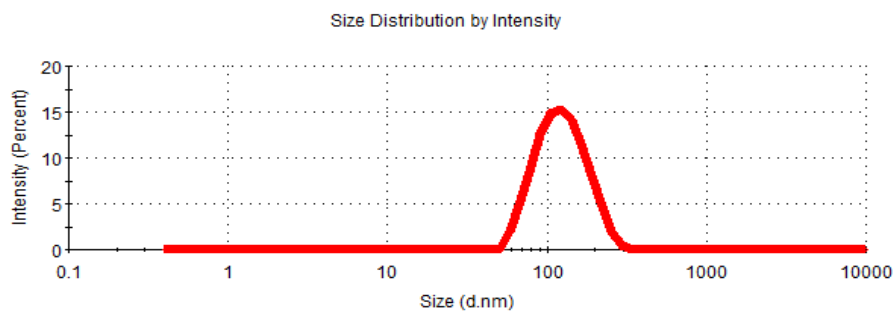

### Results (70 °C for the third run)

|                                | Size (d.nm):         | % Intensity: | St Dev (d.nm): |
|--------------------------------|----------------------|--------------|----------------|
| <b>Z-Average (d.nm):</b> 85.90 | <b>Peak 1:</b> 91.11 | 100.0        | 23.19          |
| <b>Pdl:</b> 0.040              | <b>Peak 2:</b> 0.000 | 0.0          | 0.000          |
| <b>Intercept:</b> 0.943        | <b>Peak 3:</b> 0.000 | 0.0          | 0.000          |
| <b>Result quality :</b> Good   |                      |              |                |

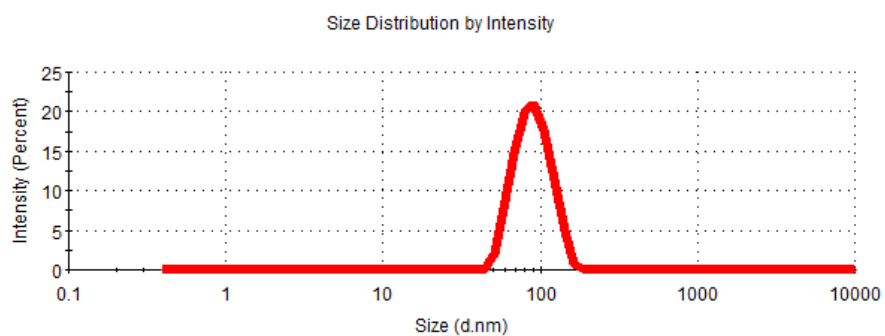

## Run 4.

### Results (25 °C for the fourth run)

|                         | Size (d.nm):  | % Intensity: | St Dev (d.nm): |
|-------------------------|---------------|--------------|----------------|
| Z-Average (d.nm): 183.1 | Peak 1: 225.7 | 100.0        | 103.1          |
| Pdl: 0.197              | Peak 2: 0.000 | 0.0          | 0.000          |
| Intercept: 0.922        | Peak 3: 0.000 | 0.0          | 0.000          |
| Result quality : Good   |               |              |                |

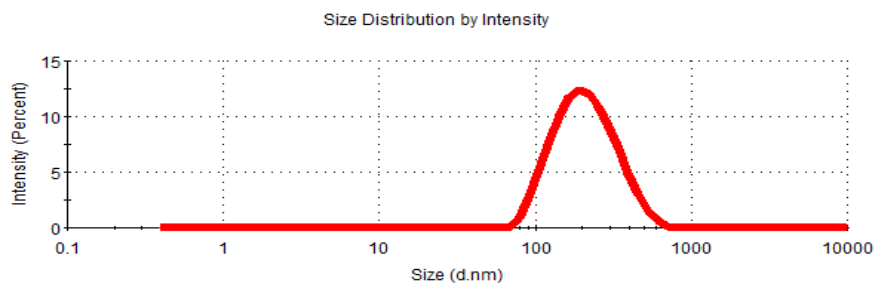

### Results (45 °C for the fourth run)

|                         | Size (d.nm):  | % Intensity: | St Dev (d.nm): |
|-------------------------|---------------|--------------|----------------|
| Z-Average (d.nm): 114.7 | Peak 1: 126.6 | 100.0        | 40.85          |
| Pdl: 0.087              | Peak 2: 0.000 | 0.0          | 0.000          |
| Intercept: 0.913        | Peak 3: 0.000 | 0.0          | 0.000          |
| Result quality : Good   |               |              |                |

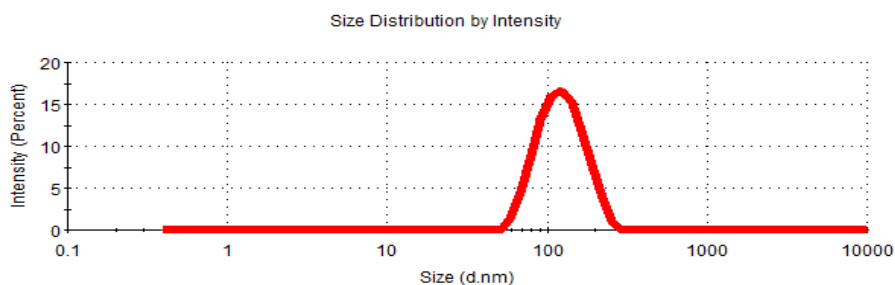

### Results (70 °C for the fourth run)

|                         | Size (d.nm):  | % Intensity: | St Dev (d.nm): |
|-------------------------|---------------|--------------|----------------|
| Z-Average (d.nm): 85.69 | Peak 1: 91.76 | 100.0        | 24.29          |
| Pdl: 0.064              | Peak 2: 0.000 | 0.0          | 0.000          |
| Intercept: 0.941        | Peak 3: 0.000 | 0.0          | 0.000          |
| Result quality : Good   |               |              |                |

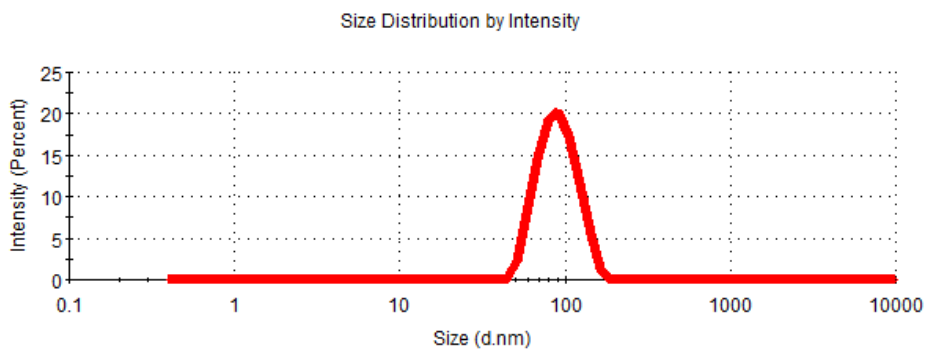

**Run 5.**  
**Results (25 °C for the fifth run)**

|                                | Size (d.nm):         | % Intensity: | St Dev (d.nm): |
|--------------------------------|----------------------|--------------|----------------|
| <b>Z-Average (d.nm):</b> 185.0 | <b>Peak 1:</b> 228.5 | 100.0        | 102.6          |
| <b>Pdl:</b> 0.185              | <b>Peak 2:</b> 0.000 | 0.0          | 0.000          |
| <b>Intercept:</b> 0.922        | <b>Peak 3:</b> 0.000 | 0.0          | 0.000          |
| <b>Result quality :</b> Good   |                      |              |                |

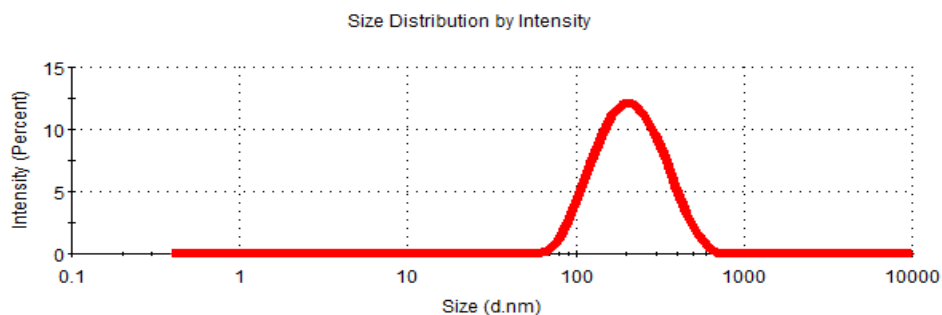

**Results (45 °C for the fifth run)**

|                                | Size (d.nm):         | % Intensity: | St Dev (d.nm): |
|--------------------------------|----------------------|--------------|----------------|
| <b>Z-Average (d.nm):</b> 116.0 | <b>Peak 1:</b> 134.1 | 100.0        | 52.52          |
| <b>Pdl:</b> 0.128              | <b>Peak 2:</b> 0.000 | 0.0          | 0.000          |
| <b>Intercept:</b> 0.915        | <b>Peak 3:</b> 0.000 | 0.0          | 0.000          |
| <b>Result quality :</b> Good   |                      |              |                |

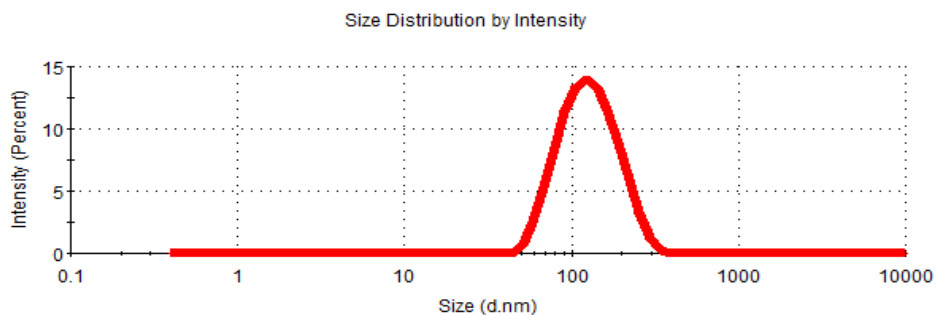

**Results (70 °C for the fifth run)**

|                                | Size (d.nm):         | % Intensity: | St Dev (d.nm): |
|--------------------------------|----------------------|--------------|----------------|
| <b>Z-Average (d.nm):</b> 87.13 | <b>Peak 1:</b> 91.63 | 100.0        | 21.58          |
| <b>Pdl:</b> 0.028              | <b>Peak 2:</b> 0.000 | 0.0          | 0.000          |
| <b>Intercept:</b> 0.946        | <b>Peak 3:</b> 0.000 | 0.0          | 0.000          |
| <b>Result quality :</b> Good   |                      |              |                |

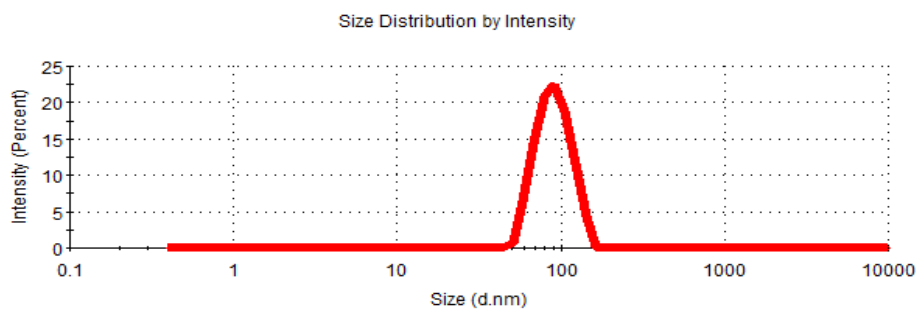

**Run 6.**  
**Results (25 °C for the sixth run)**

|                                | Size (d.nm):         | % Intensity: | St Dev (d.nm): |
|--------------------------------|----------------------|--------------|----------------|
| <b>Z-Average (d.nm):</b> 185.1 | <b>Peak 1:</b> 225.7 | 100.0        | 89.90          |
| <b>Pd:</b> 0.182               | <b>Peak 2:</b> 0.000 | 0.0          | 0.000          |
| <b>Intercept:</b> 0.921        | <b>Peak 3:</b> 0.000 | 0.0          | 0.000          |
| <b>Result quality :</b> Good   |                      |              |                |

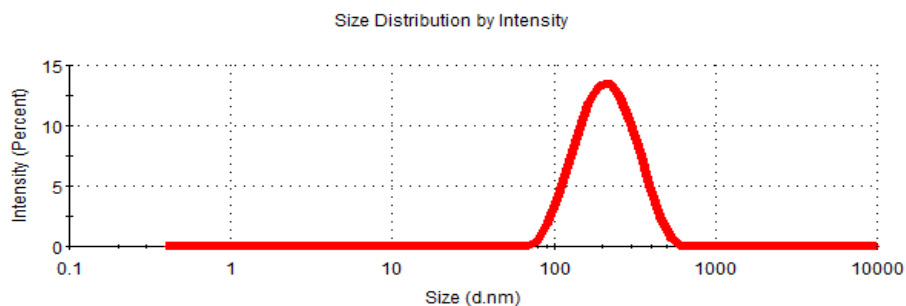

**Results (45 °C for the sixth run)**

|                                | Size (d.nm):         | % Intensity: | St Dev (d.nm): |
|--------------------------------|----------------------|--------------|----------------|
| <b>Z-Average (d.nm):</b> 120.0 | <b>Peak 1:</b> 134.3 | 100.0        | 46.48          |
| <b>Pd:</b> 0.099               | <b>Peak 2:</b> 0.000 | 0.0          | 0.000          |
| <b>Intercept:</b> 0.906        | <b>Peak 3:</b> 0.000 | 0.0          | 0.000          |
| <b>Result quality :</b> Good   |                      |              |                |

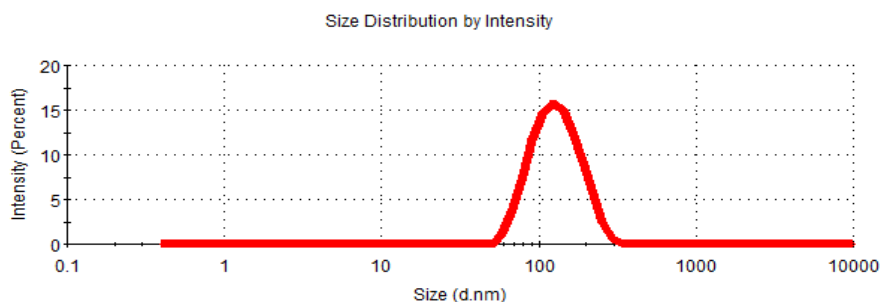

**Results (70 °C for the sixth run)**

|                                | Size (d.nm):         | % Intensity: | St Dev (d.nm): |
|--------------------------------|----------------------|--------------|----------------|
| <b>Z-Average (d.nm):</b> 86.91 | <b>Peak 1:</b> 93.14 | 100.0        | 25.35          |
| <b>Pd:</b> 0.053               | <b>Peak 2:</b> 0.000 | 0.0          | 0.000          |
| <b>Intercept:</b> 0.941        | <b>Peak 3:</b> 0.000 | 0.0          | 0.000          |
| <b>Result quality :</b> Good   |                      |              |                |

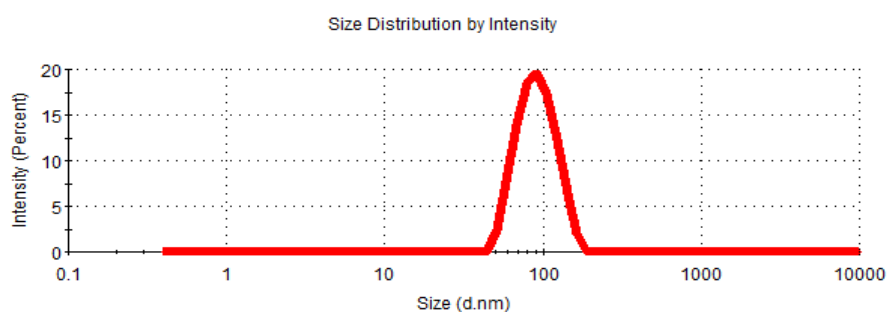



**Table S1.** Optimizing reaction conditions for the Aldol/addition reaction.<sup>a</sup>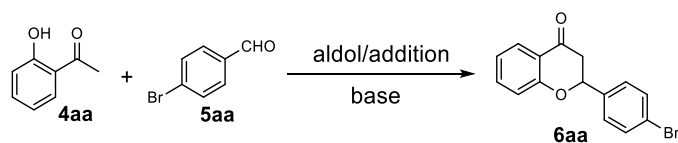

| Entry | Base             | Solvent(s)                           | °C | h  | Yield (%) of 6aa |
|-------|------------------|--------------------------------------|----|----|------------------|
| 1     | allylDBU         | <i>i</i> PrOH                        | 70 | 12 | 98               |
| 2     | allylDBU         | <i>i</i> PrOH-H <sub>2</sub> O (4:1) | 70 | 12 | 98               |
| 3     | allylDBU         | <i>i</i> PrOH-H <sub>2</sub> O (2:1) | 70 | 12 | 91               |
| 4     | allylDBU         | <i>i</i> PrOH/H <sub>2</sub> O (3:1) | 70 | 12 | 98               |
| 5     | allylDBU         | <i>i</i> PrOH/H <sub>2</sub> O (3:1) | 65 | 12 | 92               |
| 6     | allylDBU         | <i>i</i> PrOH/H <sub>2</sub> O (3:1) | 75 | 12 | 98               |
| 7     | DBU              | <i>i</i> PrOH/H <sub>2</sub> O (3:1) | 70 | 12 | 76               |
| 8     | DABCO            | <i>i</i> PrOH/H <sub>2</sub> O (3:1) | 70 | 12 | 45               |
| 9     | NEt <sub>3</sub> | <i>i</i> PrOH/H <sub>2</sub> O (3:1) | 70 | 12 | 52               |

<sup>a</sup> Reaction conditions: base (0.12 mmol of base), 4aa (0.10 mmol), 5aa (0.12 mmol), HCO<sub>2</sub>Na (1.0 mmol), and 4.0 mL of solvent. The <sup>1</sup>H-NMR yield.

**Table S2.** Optimizing reaction conditions for the DKR-ATH reaction.<sup>a</sup>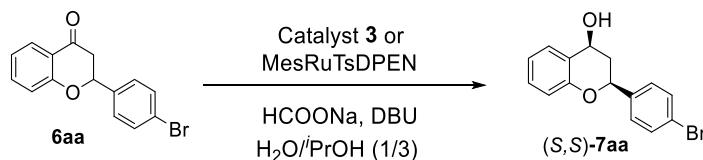

| Entry | Catalyst    | H-resource, Solvent, base                                                   | °C | h  | %Yield | % <i>ee</i> / <i>dr</i> |
|-------|-------------|-----------------------------------------------------------------------------|----|----|--------|-------------------------|
| 1     | MesRuTsDPEN | HCO <sub>2</sub> Na, <i>i</i> PrOH/H <sub>2</sub> O (3:1), NEt <sub>3</sub> | 40 | 18 | 98     | 99/1:1                  |
| 2     | MesRuTsDPEN | HCO <sub>2</sub> Na, <i>i</i> PrOH/H <sub>2</sub> O (3:1), DBU              | 40 | 18 | 98     | 99/16:1                 |
| 3     | MesRuTsDPEN | HCO <sub>2</sub> Na, <i>i</i> PrOH/H <sub>2</sub> O (3:1), DABCO            | 40 | 18 | 98     | 99/4:1                  |
| 4     | MesRuTsDPEN | HCO <sub>2</sub> Na, <i>i</i> PrOH/H <sub>2</sub> O (3:1), allylDBU         | 40 | 18 | 96     | 99/16:1                 |
| 5     | <b>3</b>    | HCO <sub>2</sub> Na, <i>i</i> PrOH/H <sub>2</sub> O (3:1), allylDBU         | 40 | 18 | 95     | 99/37:1                 |
| 6     | <b>3</b>    | HCO <sub>2</sub> Na, <i>i</i> PrOH/H <sub>2</sub> O (3:1), allylDBU         | 35 | 18 | 90     | 99/37:1                 |
| 7     | <b>3</b>    | HCO <sub>2</sub> Na, <i>i</i> PrOH/H <sub>2</sub> O (3:1), allylDBU         | 45 | 18 | 99     | 99/20:1                 |

<sup>a</sup> Reaction conditions: catalyst (2.50 mol% of Ru-loading), 6aa (0.10 mmol), base (0.12 mmol), HCO<sub>2</sub>Na (1.0 mmol), and 4.0 mL of the mixed H<sub>2</sub>O/*i*PrOH co-solvents. The <sup>1</sup>H-NMR yield, the %*ee*/*dr* values were determined by chiral HPLC analysis.

**Figure S6. HPLC analyses of chiral products**

**(S,S)-7aa: (2S,4S)-2-(4-bromophenyl)chroman-4-ol** (HPLC: Chiracel AD-H, detected at 210 nm, eluent: n-hexane/2-propanol = 95/5, flow rate = 1.0mL/min, 25 °C).

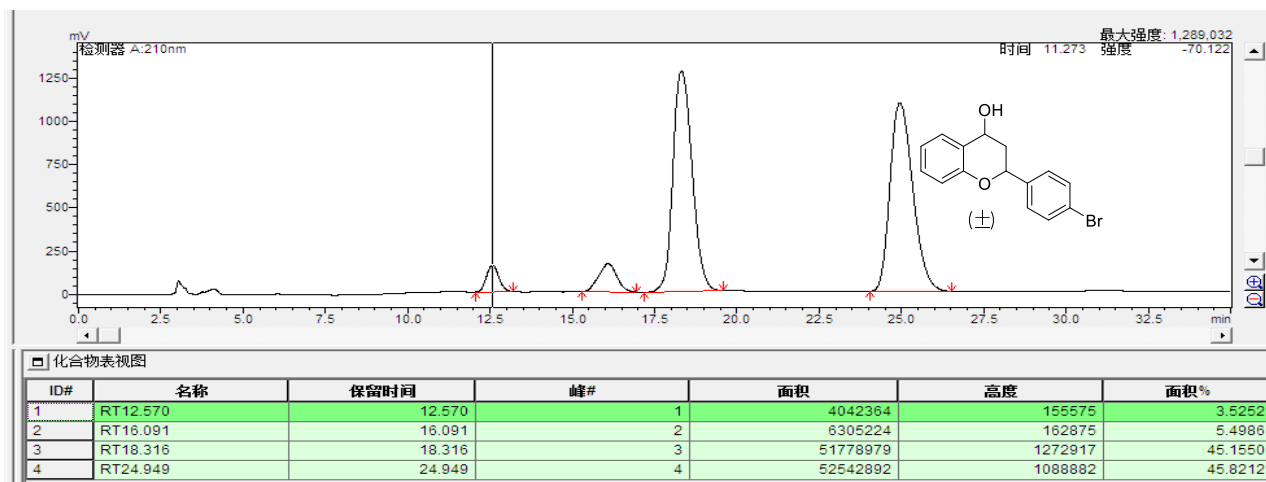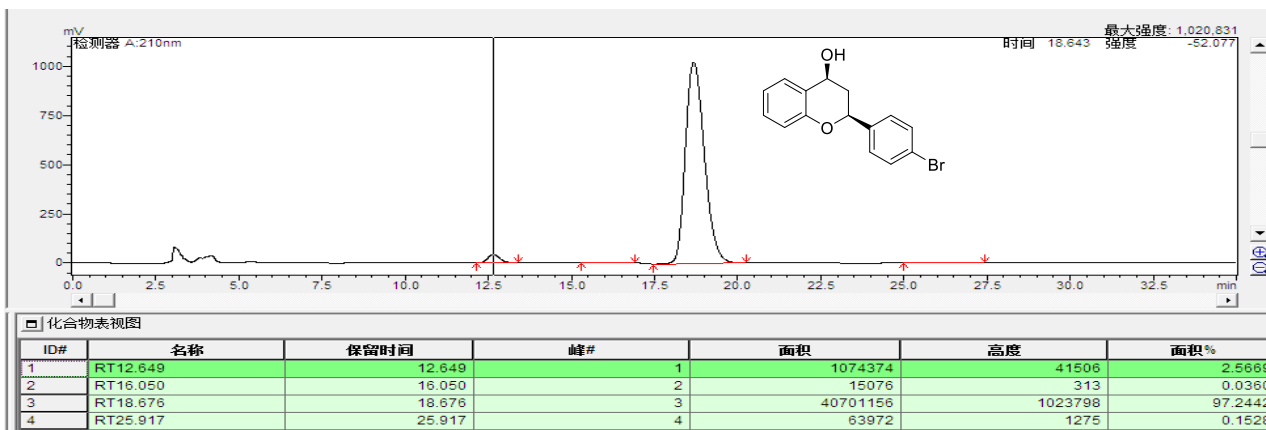

**Translation of all characters (Chinese) in the above two frameworks to English is as follows:**

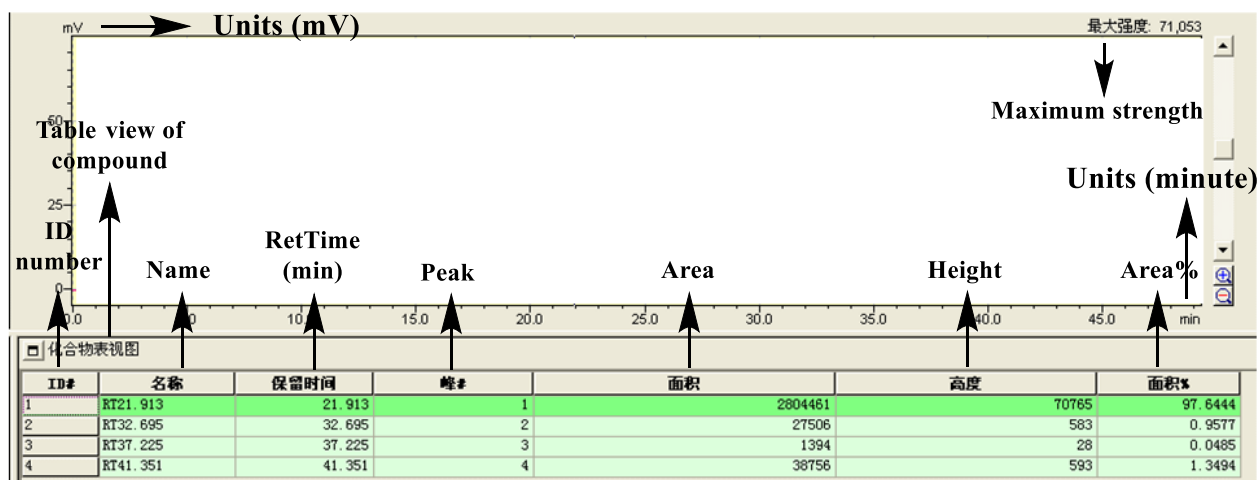

**(S,S)-7ab: (2S,4S)-2-(4-fluorophenyl)chroman-4-ol** (HPLC: Chiracel AD-H, detected at 210 nm, eluent: n-hexane/2-propanol = 95/5, flow rate = 1.0mL/min, 25 °C).

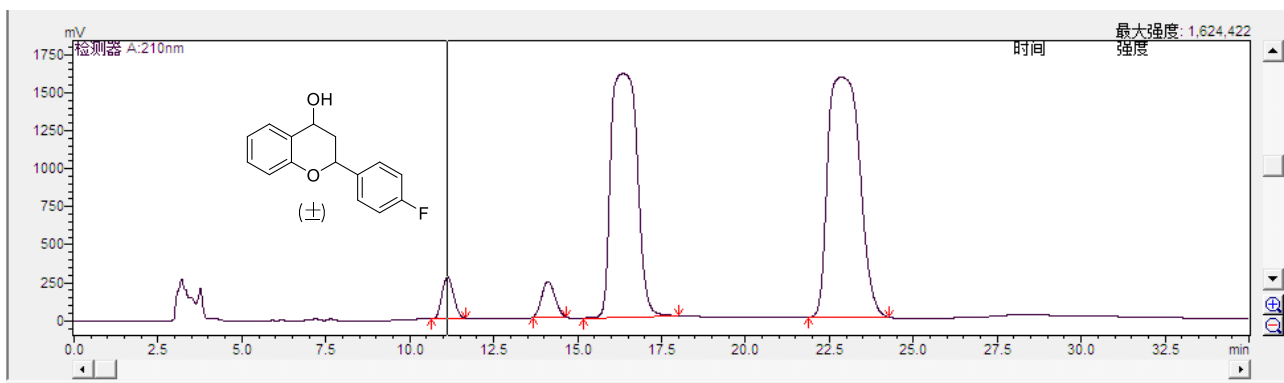

化合物表视图

| ID# | 名称       | 保留时间   | 峰# | 面积        | 高度      | 面积%     |
|-----|----------|--------|----|-----------|---------|---------|
| 1   | RT11.121 | 11.121 | 1  | 6604303   | 273980  | 3.2305  |
| 2   | RT14.115 | 14.115 | 2  | 6390378   | 233758  | 3.1259  |
| 3   | RT16.340 | 16.340 | 3  | 87270823  | 1600001 | 42.6886 |
| 4   | RT22.848 | 22.848 | 4  | 104170220 | 1578330 | 50.9550 |

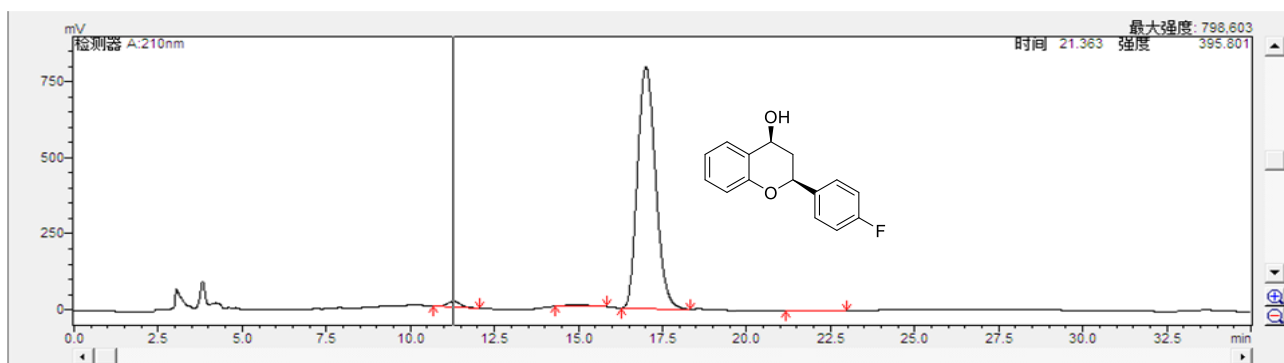

化合物表视图

| ID# | 名称       | 保留时间   | 峰# | 面积       | 高度     | 面积%     |
|-----|----------|--------|----|----------|--------|---------|
| 1   | RT11.279 | 11.279 | 1  | 481024   | 18257  | 1.5764  |
| 2   | RT14.930 | 14.930 | 2  | 259846   | 4276   | 0.8515  |
| 3   | RT17.006 | 17.006 | 3  | 29764469 | 795086 | 97.5414 |
| 4   | RT22.954 | 22.954 | 4  | 9361     | 7      | 0.0307  |

**Translation of all characters (Chinese) in the above two frameworks to English is as follows:**

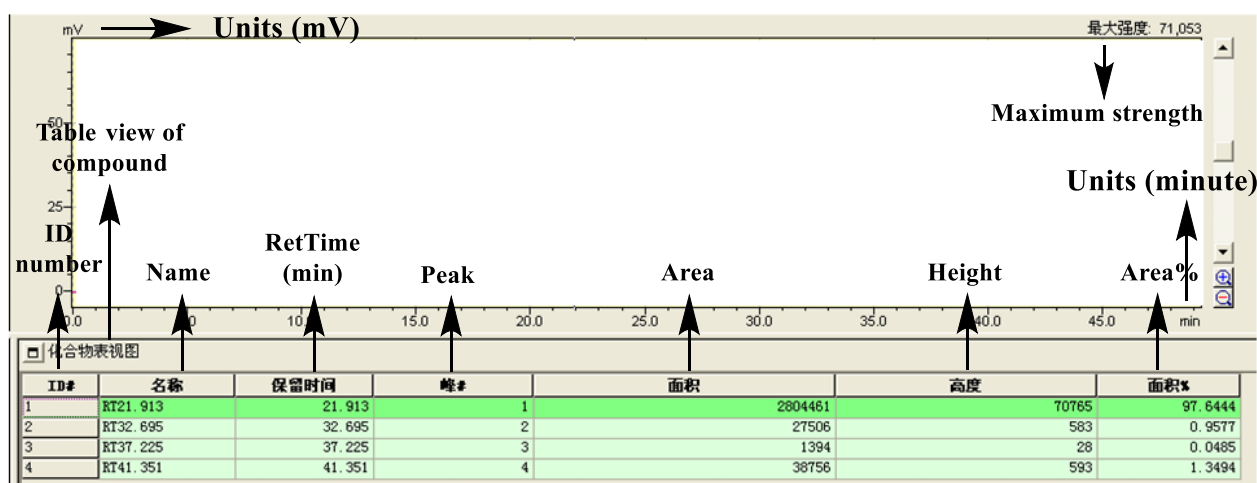

**(S,S)-7ac: (2S,4S)-2-(4-chlorophenyl)chroman-4-ol** (HPLC: Chiracel AD-H, detected at 210 nm, eluent: n-hexane/2-propanol = 95/5, flow rate = 1.0mL/min, 25 °C).

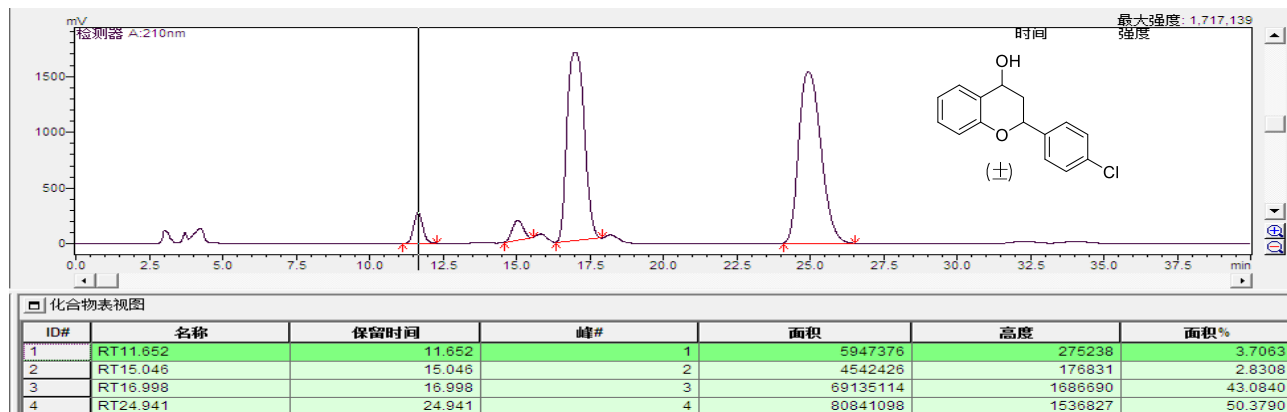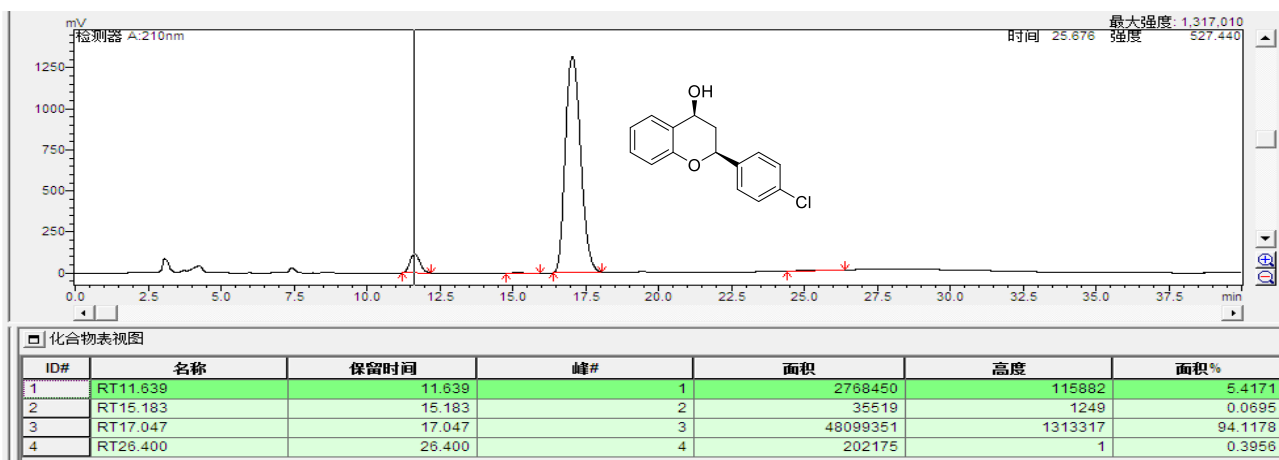

**Translation of all characters (Chinese) in the above two frameworks to English is as follows:**

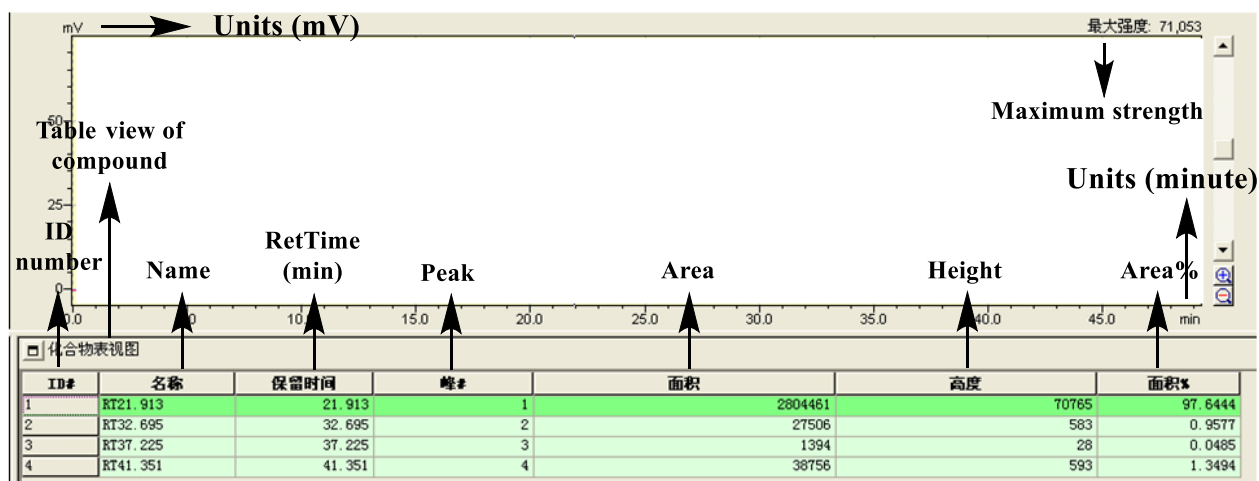

**(S,S)-7ad: (2S,4S)-2-(3-chlorophenyl)chroman-4-ol** (HPLC: Chiracel AD-H, detected at 210 nm, eluent: n-hexane/2-propanol = 95/5, flow rate = 1.0mL/min, 25 °C).

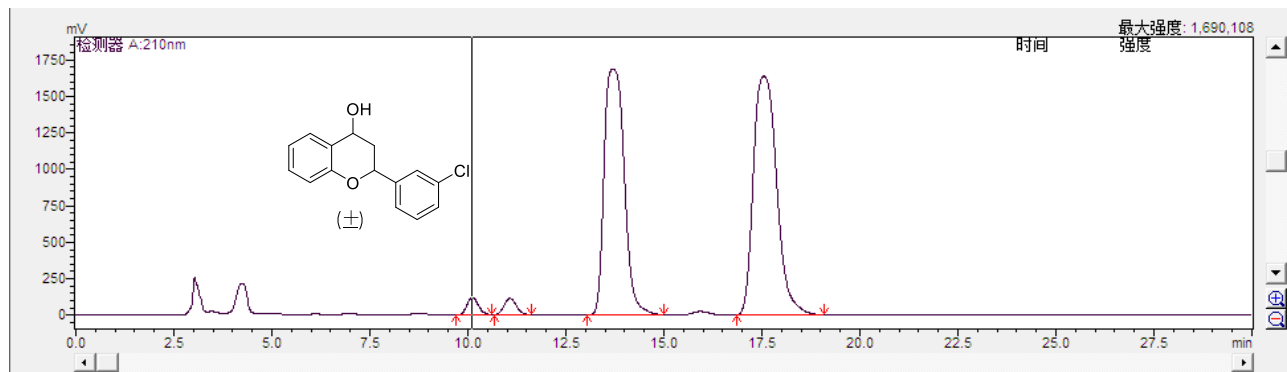

化合物表视图

| ID# | 名称       | 保留时间   | 峰# | 面积       | 高度      | 面积%     |
|-----|----------|--------|----|----------|---------|---------|
| 1   | RT10.111 | 10.111 | 1  | 2381586  | 118887  | 1.7942  |
| 2   | RT11.068 | 11.068 | 2  | 2427687  | 111471  | 1.8289  |
| 3   | RT13.703 | 13.703 | 3  | 60155020 | 1688136 | 45.3183 |
| 4   | RT17.541 | 17.541 | 4  | 67774720 | 1637115 | 51.0586 |

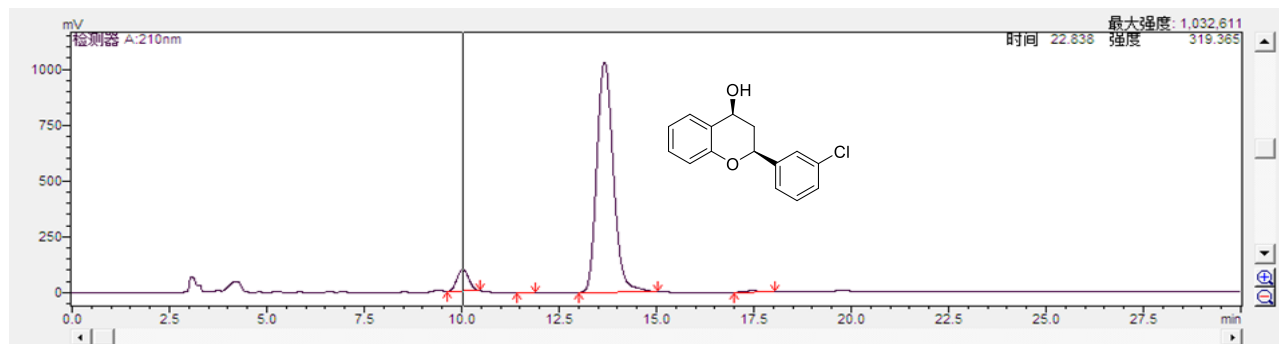

化合物表视图

| ID# | 名称       | 保留时间   | 峰# | 面积       | 高度      | 面积%     |
|-----|----------|--------|----|----------|---------|---------|
| 1   | RT10.027 | 10.027 | 1  | 2086985  | 98521   | 6.3917  |
| 2   | RT11.564 | 11.564 | 2  | 11337    | 668     | 0.0347  |
| 3   | RT13.665 | 13.665 | 3  | 30364894 | 1030493 | 92.9973 |
| 4   | RT17.457 | 17.457 | 4  | 188155   | 6033    | 0.5763  |

**Translation of all characters (Chinese) in the above two frameworks to English is as follows:**

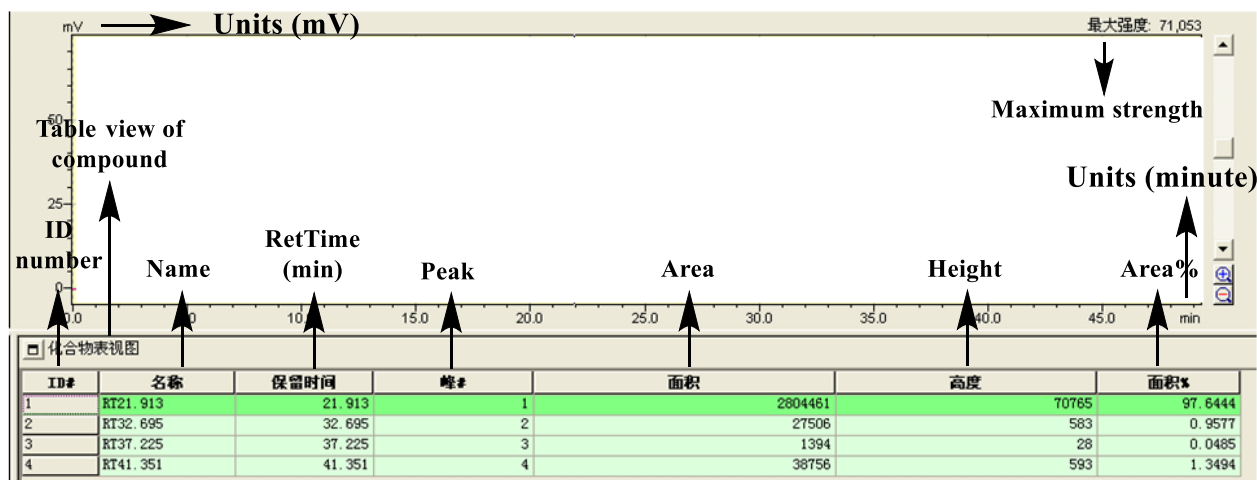

**(S,S)-7ae: (2S,4S)-2-(2-chlorophenyl)chroman-4-ol** (HPLC: Chiracel AD-H, detected at 210 nm, eluent: n-hexane/2-propanol = 97/3, flow rate = 1.0mL/min, 25 °C).

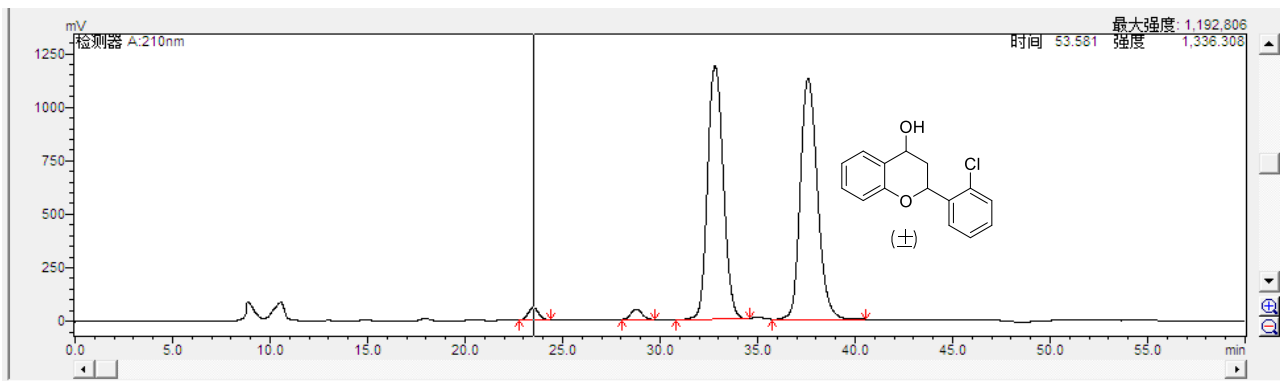

化合物表视图

| ID# | 名称       | 保留时间   | 峰# | 面积       | 高度      | 面积%     |
|-----|----------|--------|----|----------|---------|---------|
| 1   | RT23.497 | 23.497 | 1  | 2019522  | 56348   | 1.4492  |
| 2   | RT28.771 | 28.771 | 2  | 1964784  | 48934   | 1.4099  |
| 3   | RT32.811 | 32.811 | 3  | 66518825 | 1182702 | 47.7332 |
| 4   | RT37.584 | 37.584 | 4  | 68852420 | 1125002 | 49.4077 |

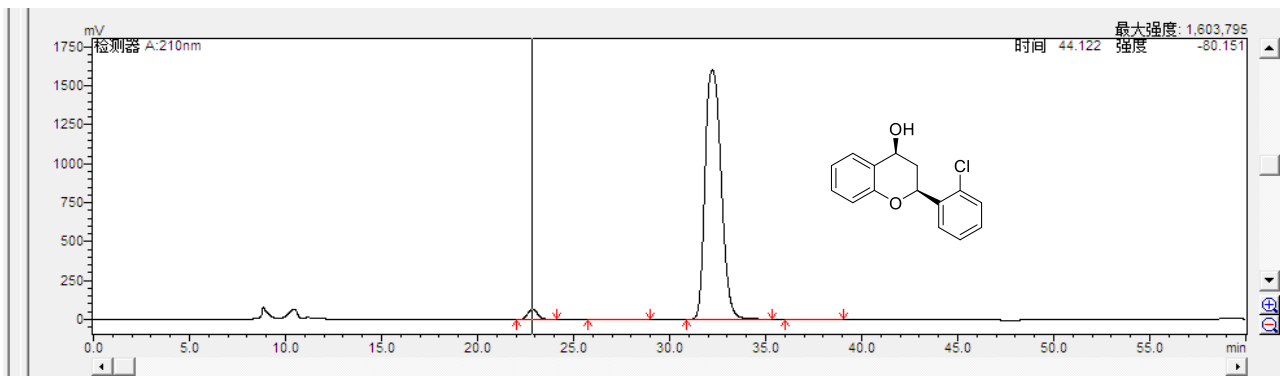

化合物表视图

| ID# | 名称       | 保留时间   | 峰# | 面积       | 高度      | 面积%     |
|-----|----------|--------|----|----------|---------|---------|
| 1   | RT22.861 | 22.861 | 1  | 2441840  | 66987   | 2.5334  |
| 2   | RT26.101 | 26.101 | 2  | 90386    | 1252    | 0.0938  |
| 3   | RT32.214 | 32.214 | 3  | 93854473 | 1604456 | 97.3721 |
| 4   | RT37.119 | 37.119 | 4  | 710      | 1926    | 0.0007  |

**Translation of all characters (Chinese) in the above two frameworks to English is as follows:**

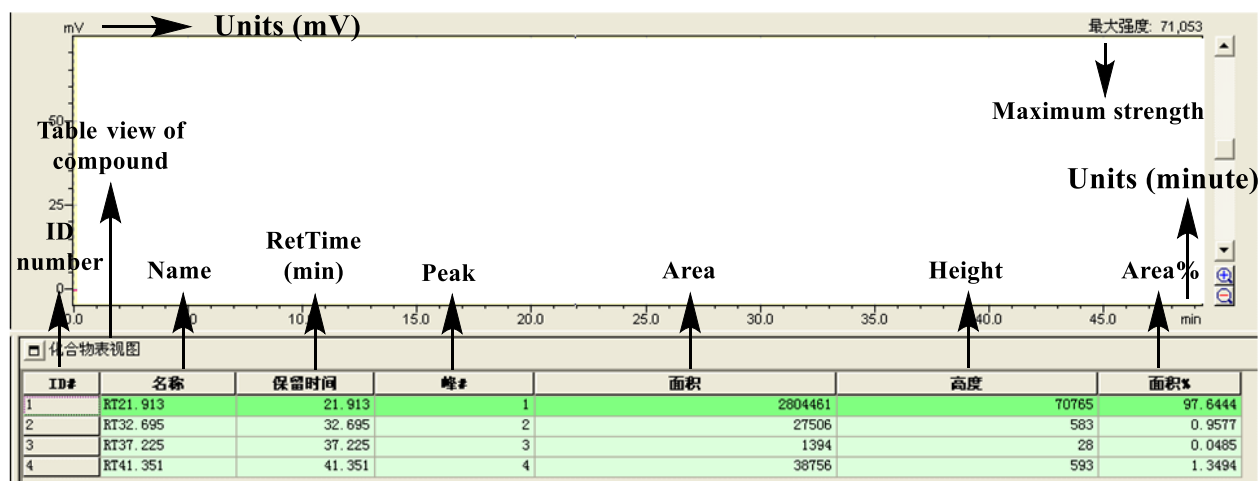

**(S,S)-7af: (2S,4S)-2-phenylchroman-4-ol** (HPLC: Chiracel AD-H, detected at 210 nm, eluent: n-hexane/2-propanol = 95/5, flow rate = 1.0mL/min, 25 °C).

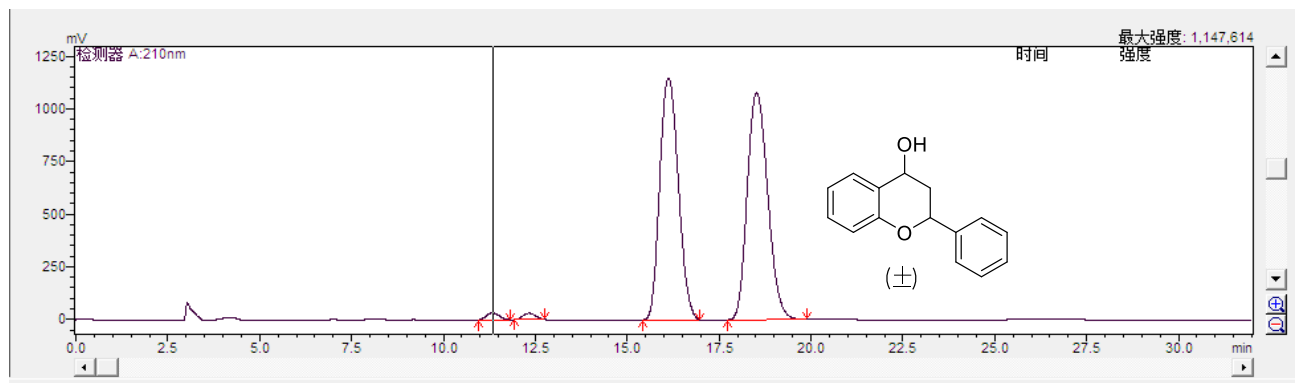

化合物表视图

| ID# | 名称       | 保留时间   | 峰# | 面积       | 高度      | 面积%     |
|-----|----------|--------|----|----------|---------|---------|
| 1   | RT11.339 | 11.339 | 1  | 767011   | 32255   | 0.9131  |
| 2   | RT12.328 | 12.328 | 2  | 733267   | 30129   | 0.8729  |
| 3   | RT16.121 | 16.121 | 3  | 40554873 | 1150421 | 48.2802 |
| 4   | RT18.521 | 18.521 | 4  | 41943825 | 1077800 | 49.9337 |

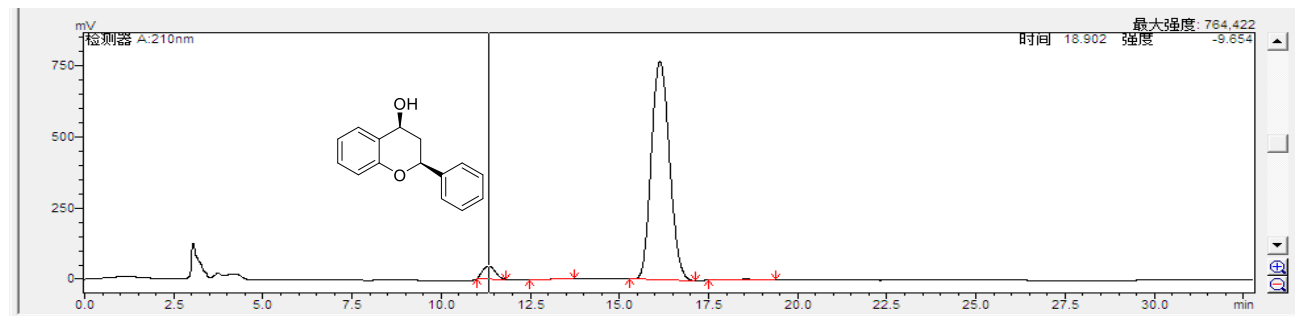

化合物表视图

| ID# | 名称       | 保留时间   | 峰# | 面积       | 高度     | 面积%     |
|-----|----------|--------|----|----------|--------|---------|
| 1   | RT11.324 | 11.324 | 1  | 1142748  | 46386  | 4.0139  |
| 2   | RT13.708 | 13.708 | 2  | 16614    | 15     | 0.0584  |
| 3   | RT16.133 | 16.133 | 3  | 27166087 | 766833 | 95.4198 |
| 4   | RT18.554 | 18.554 | 4  | 144619   | 3730   | 0.5080  |

**Translation of all characters (Chinese) in the above two frameworks to English is as follows:**

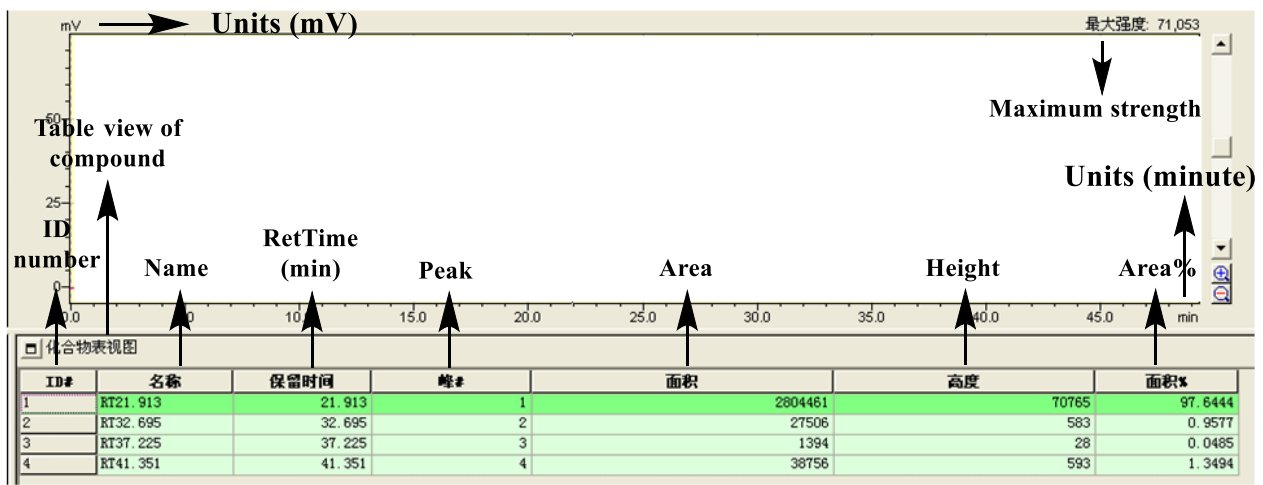

**(S,S)-7ag: (2S,4S)-2-(p-tolyl)chroman-4-ol** (HPLC: Chiralcel AD-H, detected at 210 nm, eluent: n-hexane/2-propanol = 95/5, flow rate = 1.0mL/min, 25 °C).

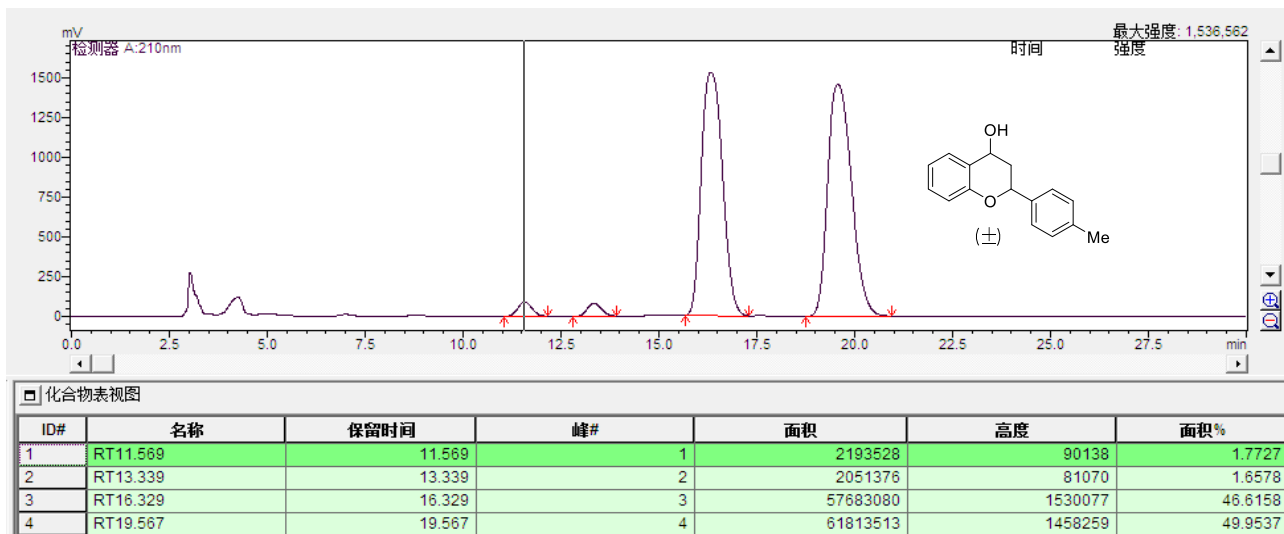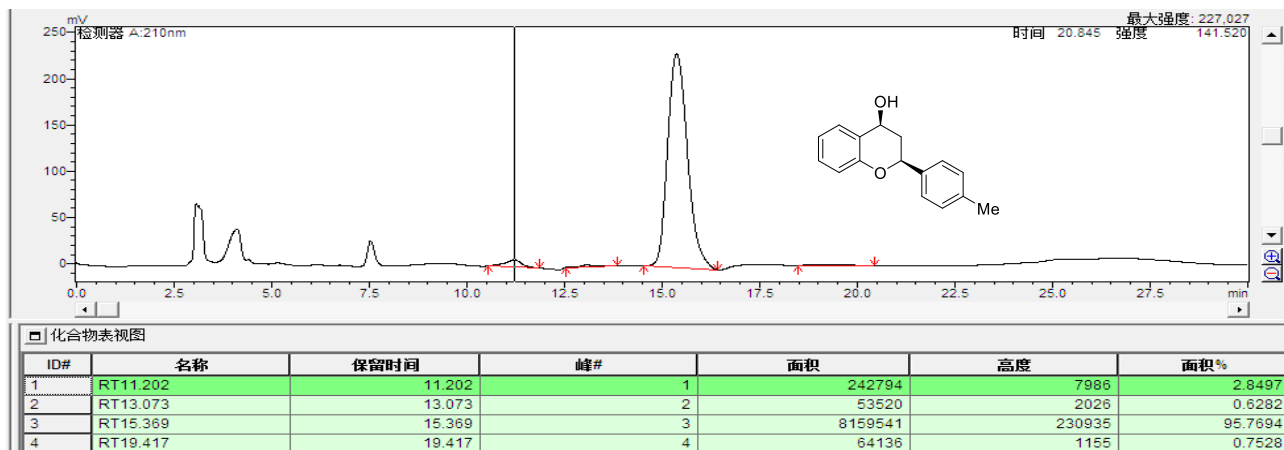

**Translation of all characters (Chinese) in the above two frameworks to English is as follows:**

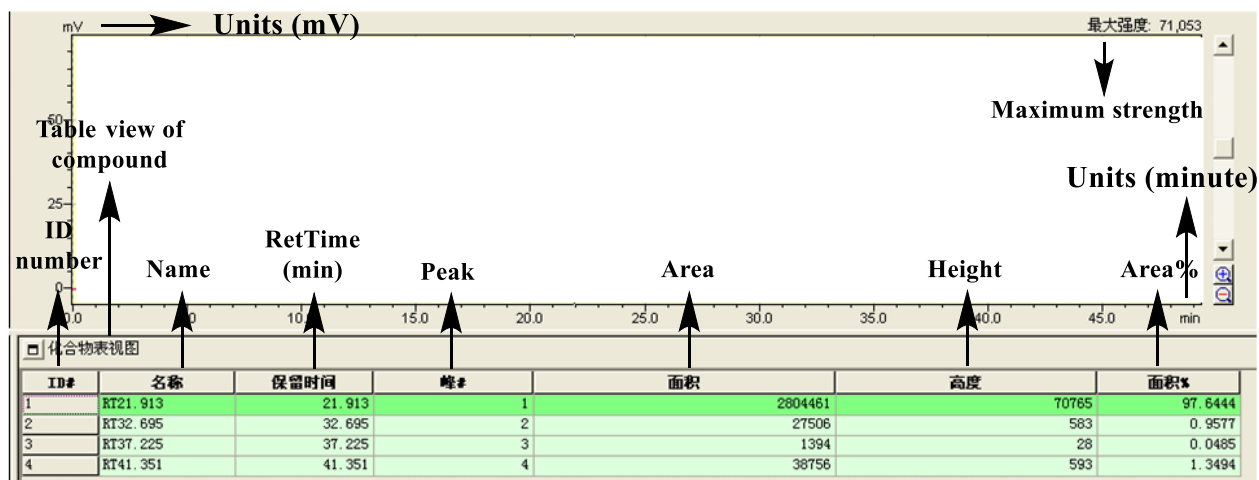



**(S,S)-7ah: (2S,4S)-2-(m-tolyl)chroman-4-ol** (HPLC: Chiracel AD-H, detected at 210 nm, eluent: n-hexane/2-propanol = 95/5, flow rate = 1.0mL/min, 25 °C).

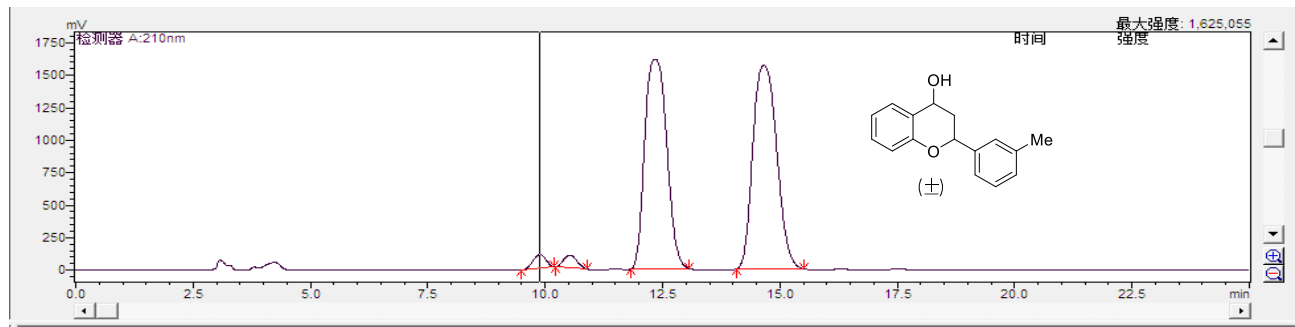

化合物表视图

| ID# | 名称       | 保留时间   | 峰# | 面积       | 高度      | 面积%     |
|-----|----------|--------|----|----------|---------|---------|
| 1   | RT9.883  | 9.883  | 1  | 2052243  | 105047  | 1.8344  |
| 2   | RT10.522 | 10.522 | 2  | 1935265  | 97631   | 1.7299  |
| 3   | RT12.339 | 12.339 | 3  | 52484736 | 1613398 | 46.9147 |
| 4   | RT14.657 | 14.657 | 4  | 55400508 | 1565426 | 49.5210 |

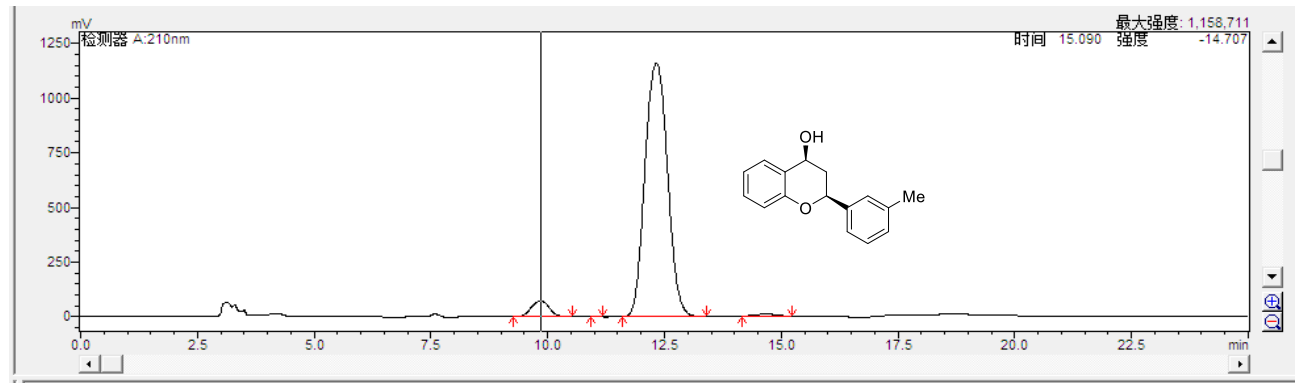

化合物表视图

| ID# | 名称       | 保留时间   | 峰# | 面积       | 高度      | 面积%     |
|-----|----------|--------|----|----------|---------|---------|
| 1   | RT9.845  | 9.845  | 1  | 1949852  | 72631   | 4.7346  |
| 2   | RT10.925 | 10.925 | 2  | 81       | -2      | 0.0002  |
| 3   | RT12.324 | 12.324 | 3  | 38922258 | 1157822 | 94.5112 |
| 4   | RT14.668 | 14.668 | 4  | 310522   | 9569    | 0.7540  |

**Translation of all characters (Chinese) in the above two frameworks to English is as follows:**

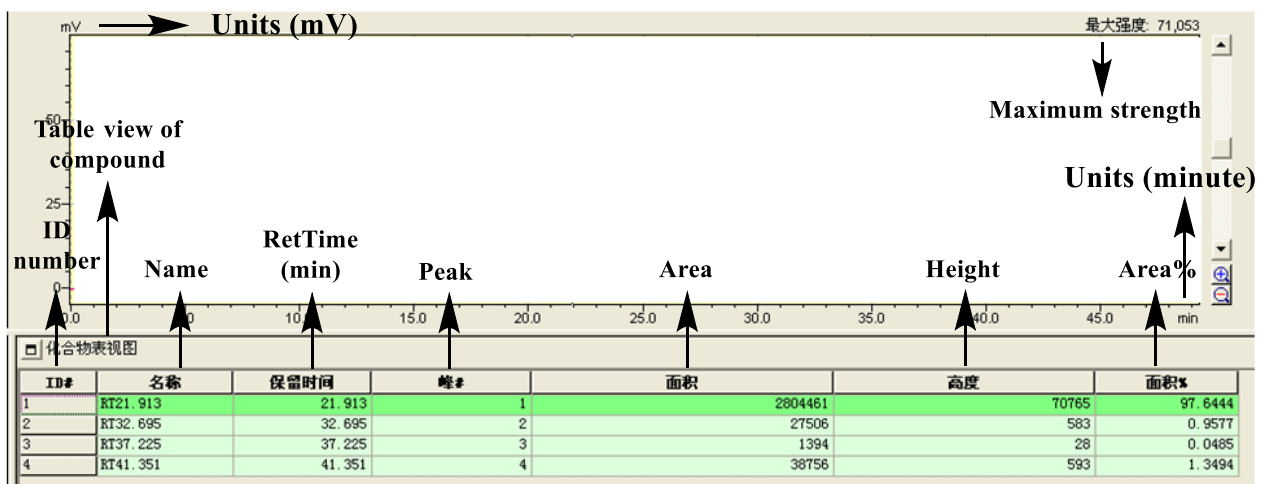

**(S,S)-7ai: (2S,4S)-2-(o-tolyl)chroman-4-ol** (HPLC: Chiracel AD-H, detected at 210 nm, eluent: n-hexane/2-propanol = 97/3, flow rate = 1.0mL/min, 25 °C).

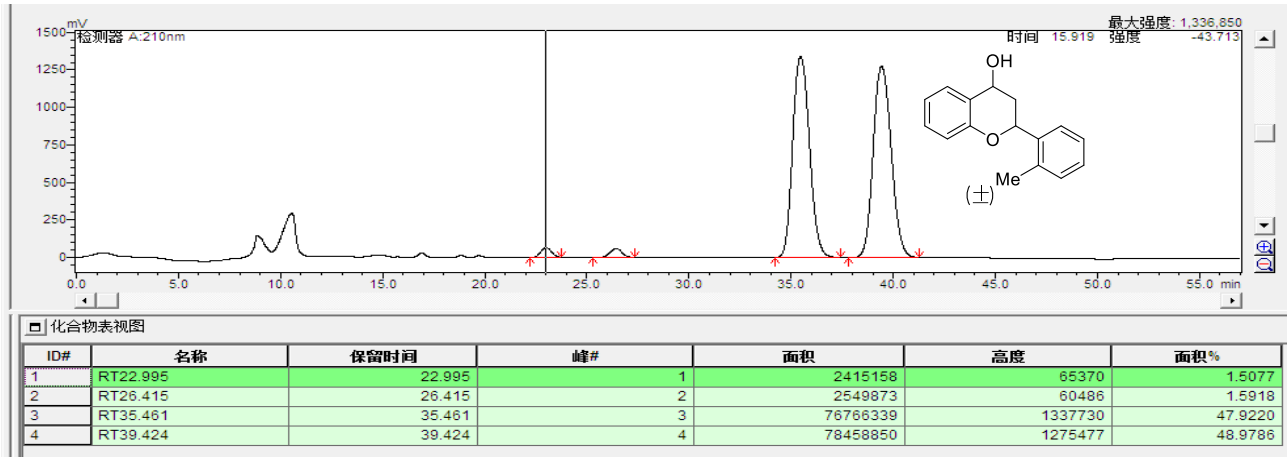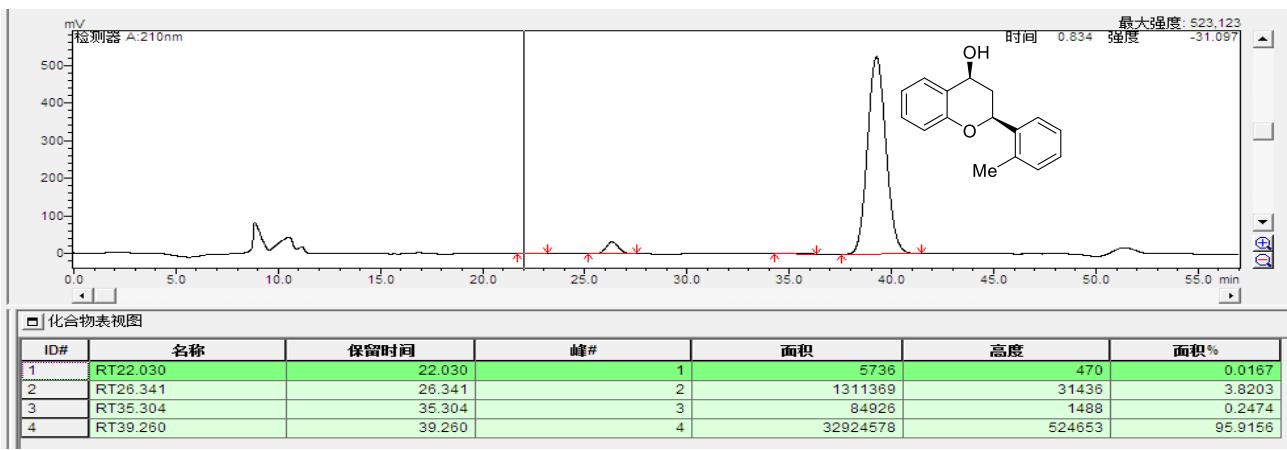

**Translation of all characters (Chinese) in the above two frameworks to English is as follows:**

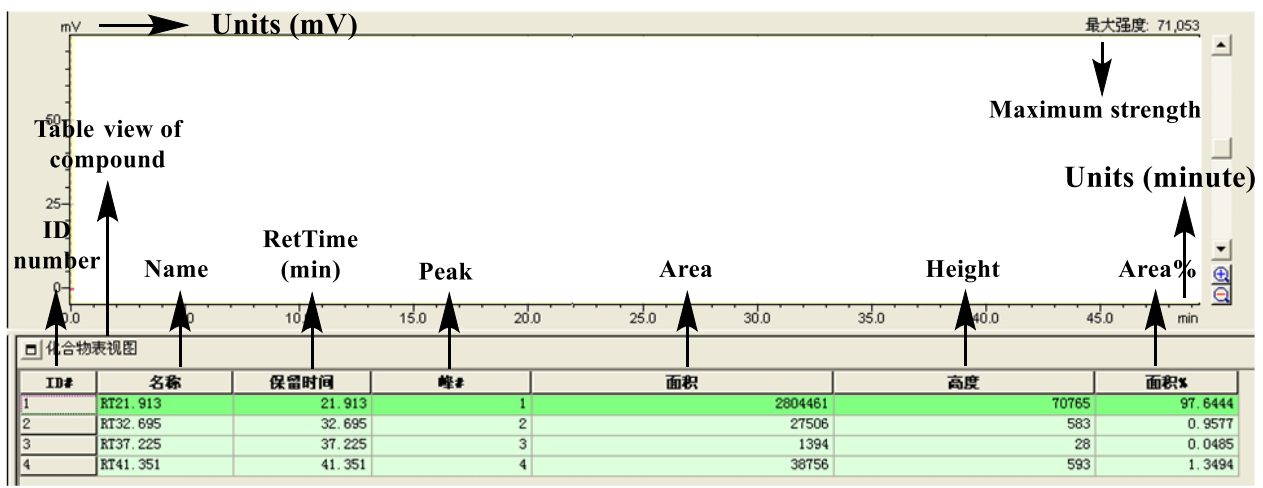

**(S,S)-7aj: (2S,4S)-2-(4-methoxyphenyl)chroman-4-ol** (HPLC: Chiracel AD-H, detected at 210 nm, eluent: n-hexane/2-propanol = 97/3, flow rate = 1.0mL/min, 25 °C).

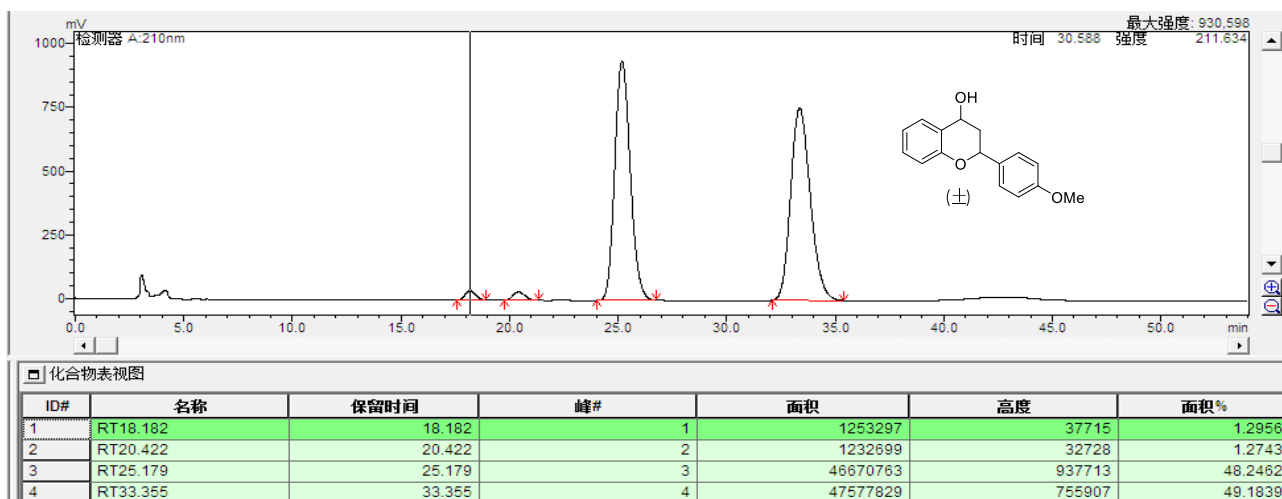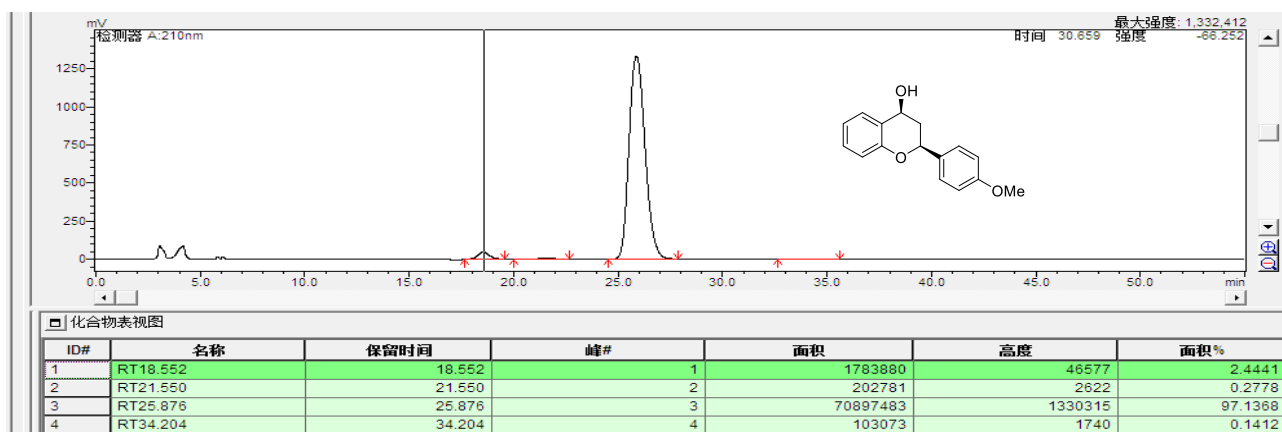

**Translation of all characters (Chinese) in the above two frameworks to English is as follows:**

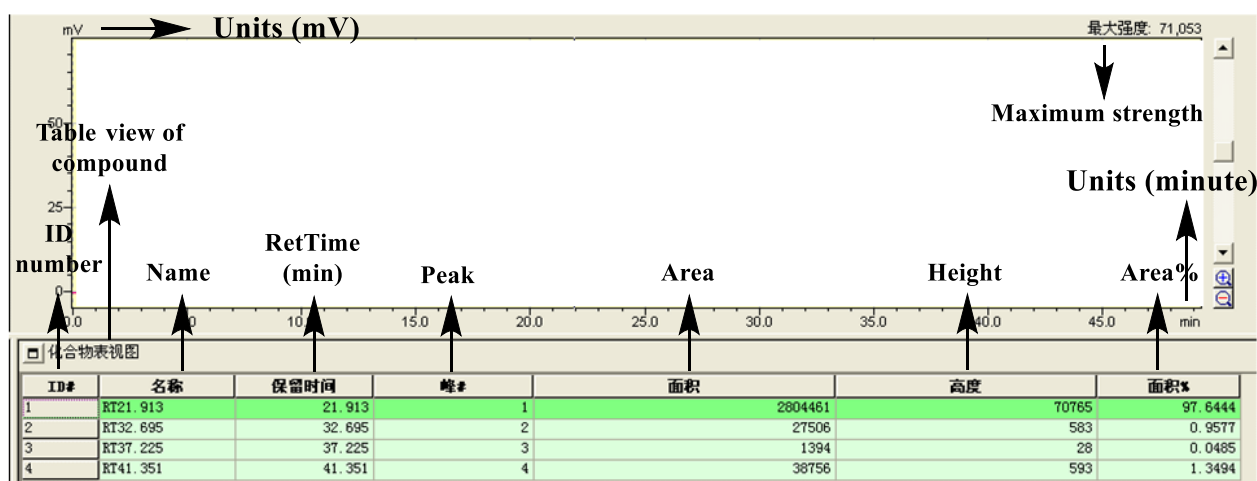

**(S,S)-7ak: (2S,4S)-2-(3-methoxyphenyl)chroman-4-ol** (HPLC: Chiracel AD-H, detected at 210 nm, eluent: n-hexane/2-propanol = 95/5, flow rate = 1.0mL/min, 25 °C).

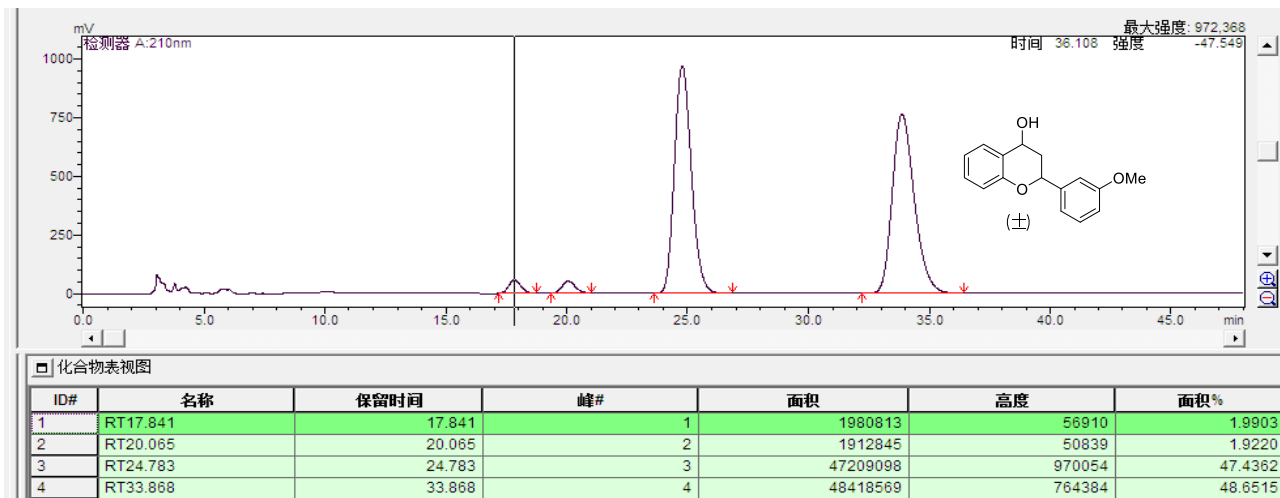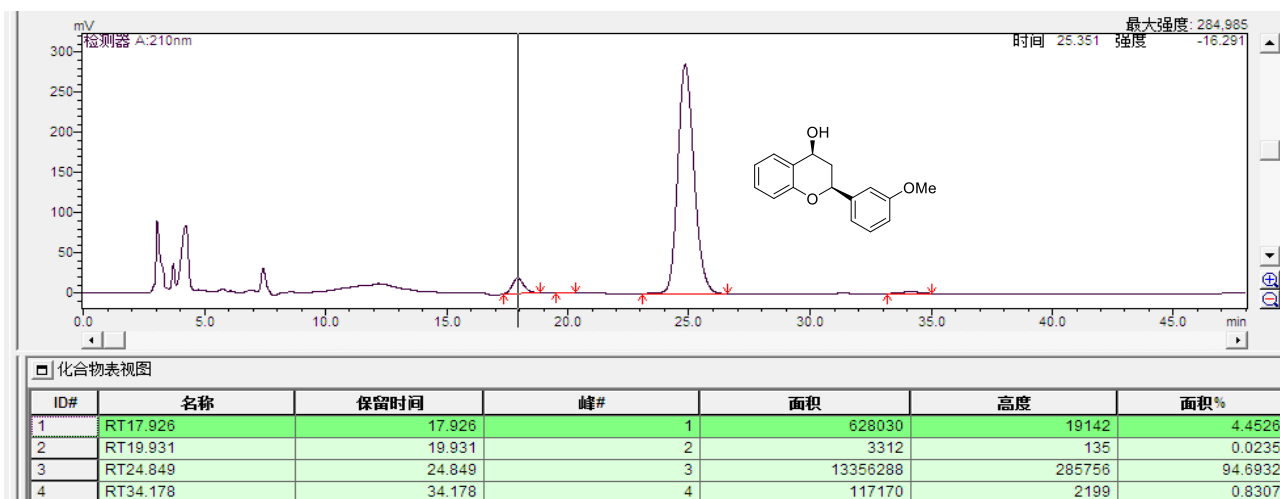

**Translation of all characters (Chinese) in the above two frameworks to English is as follows:**



**(S,S)-7al:** (2S,4S)-2-(2-methoxyphenyl)chroman-4-ol: (HPLC: Chiracel AD-H, detected at 210 nm, eluent: n-hexane/2-propanol = 95/5, flow rate = 1.0mL/min, 25 °C).

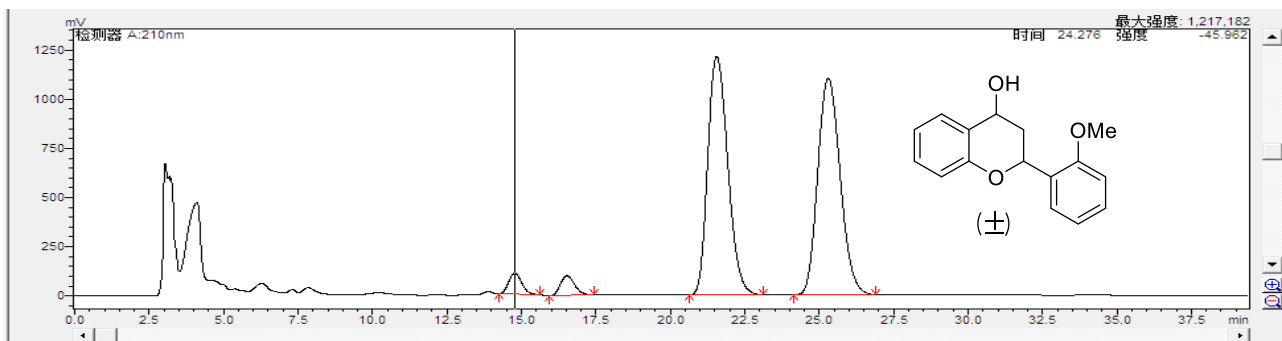

| ID# | 名称       | 保留时间   | 峰# | 面积       | 高度      | 面积%     |
|-----|----------|--------|----|----------|---------|---------|
| 1   | RT14.775 | 14.775 | 1  | 3335524  | 108601  | 2.7488  |
| 2   | RT16.527 | 16.527 | 2  | 3394267  | 101565  | 2.7972  |
| 3   | RT21.555 | 21.555 | 3  | 56853524 | 1212769 | 46.8530 |
| 4   | RT25.300 | 25.300 | 4  | 57761267 | 1101541 | 47.6010 |

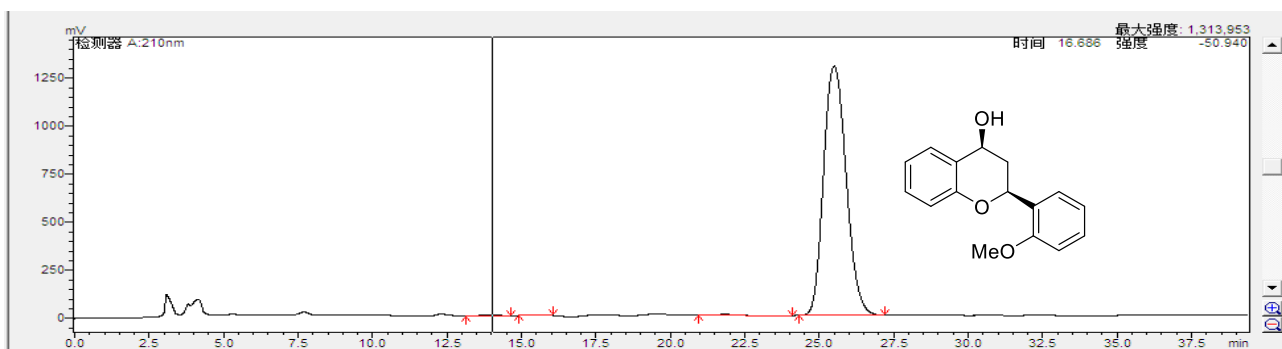

| ID# | 名称       | 保留时间   | 峰# | 面积       | 高度      | 面积%     |
|-----|----------|--------|----|----------|---------|---------|
| 1   | RT14.011 | 14.011 | 1  | 29974    | 669     | 0.0435  |
| 2   | RT15.857 | 15.857 | 2  | 10548    | 395     | 0.0153  |
| 3   | RT21.837 | 21.837 | 3  | 129780   | 5132    | 0.1884  |
| 4   | RT25.496 | 25.496 | 4  | 68705509 | 1297830 | 99.7527 |

**Translation of all characters (Chinese) in the above two frameworks to English is as follows:**

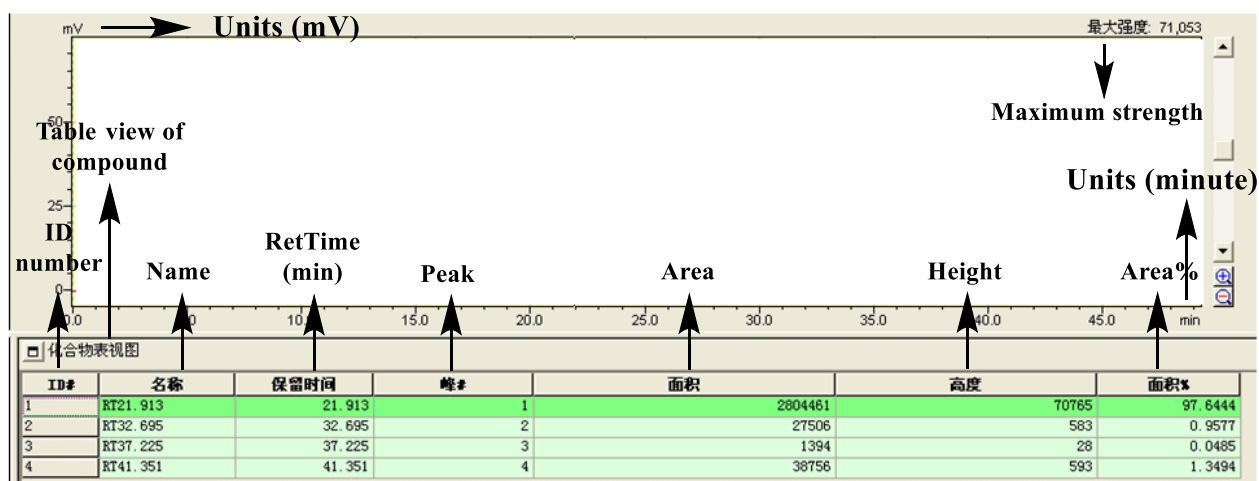

**(S,S)-7am: (2S,4S)-2-(furan-2-yl)chroman-4-ol:** (HPLC: Chiracel AD-H, detected at 210 nm, eluent: n-hexane/2-propanol = 97/3, flow rate = 1.0mL/min, 25 °C).

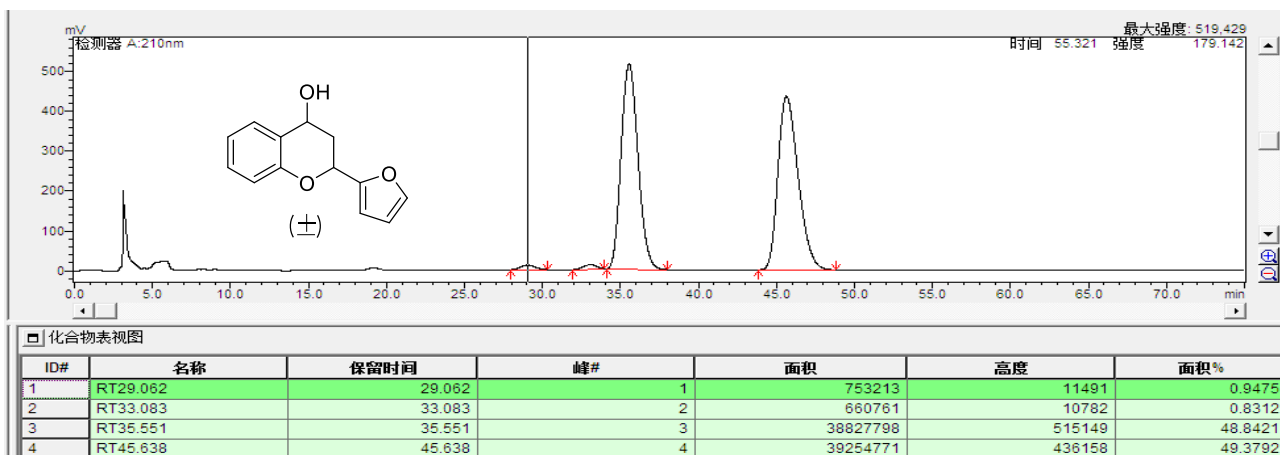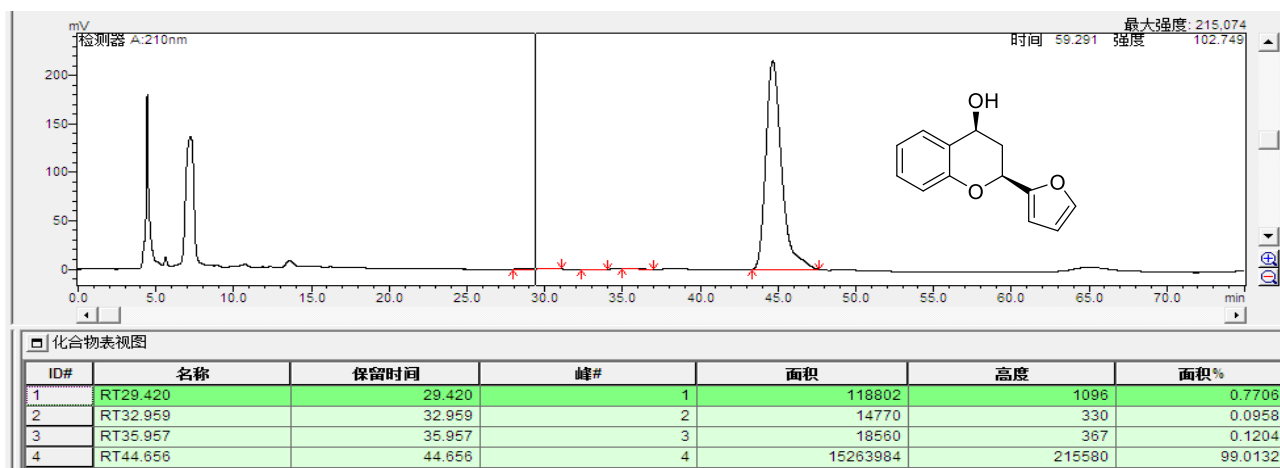

**Translation of all characters (Chinese) in the above two frameworks to English is as follows:**

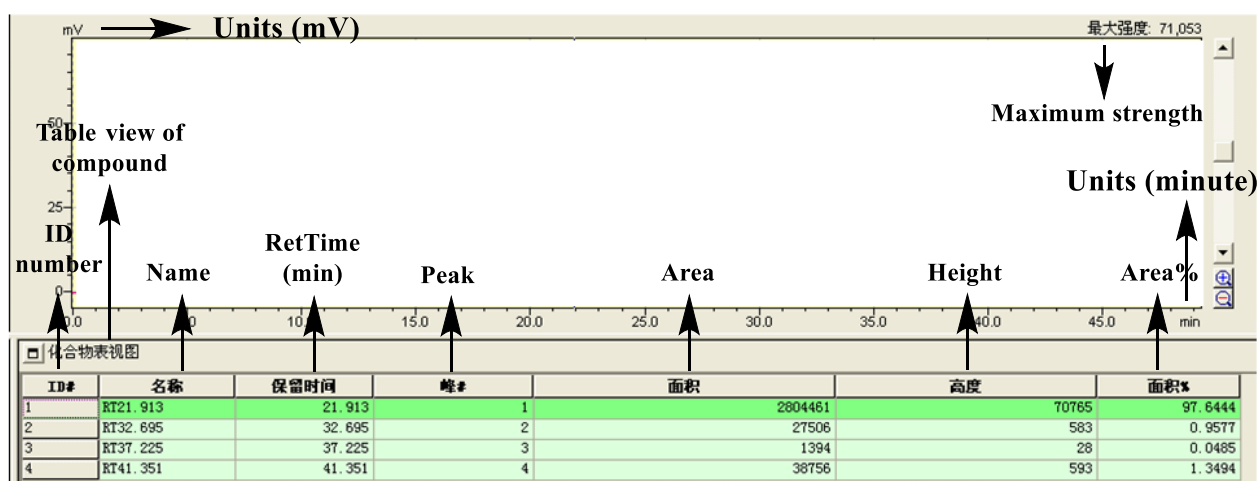

**(S,S)-7an: (2S,4S)-2-(thiophen-2-yl)chroman-4-ol:** (HPLC: Chiracel AD-H, detected at 210 nm, eluent: n-hexane/2-propanol = 95/5, flow rate = 1.0mL/min, 25 °C).

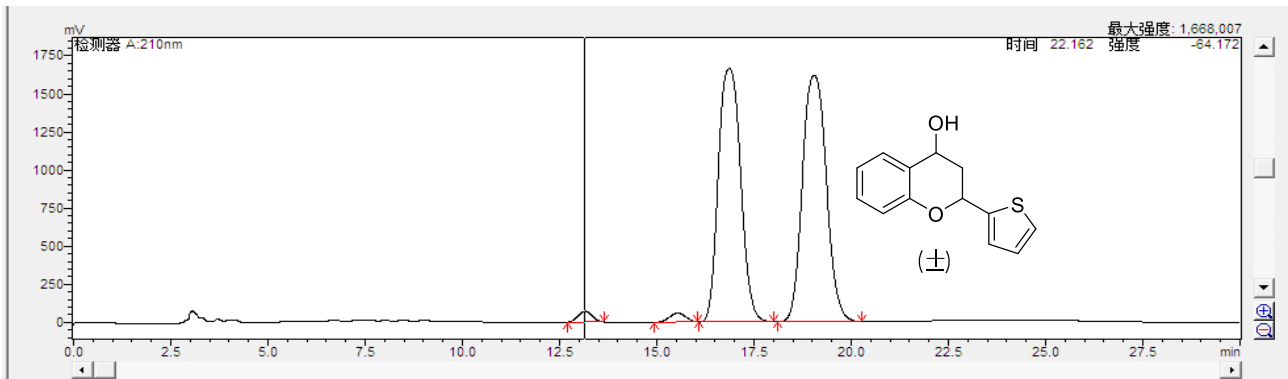

化合物表视图

| ID# | 名称       | 保留时间   | 峰# | 面积       | 高度      | 面积%     |
|-----|----------|--------|----|----------|---------|---------|
| 1   | RT13.147 | 13.147 | 1  | 1804667  | 71438   | 1.2958  |
| 2   | RT15.534 | 15.534 | 2  | 1741023  | 60097   | 1.2501  |
| 3   | RT16.856 | 16.856 | 3  | 66445531 | 1665216 | 47.7105 |
| 4   | RT19.047 | 19.047 | 4  | 69276969 | 1617591 | 49.7436 |

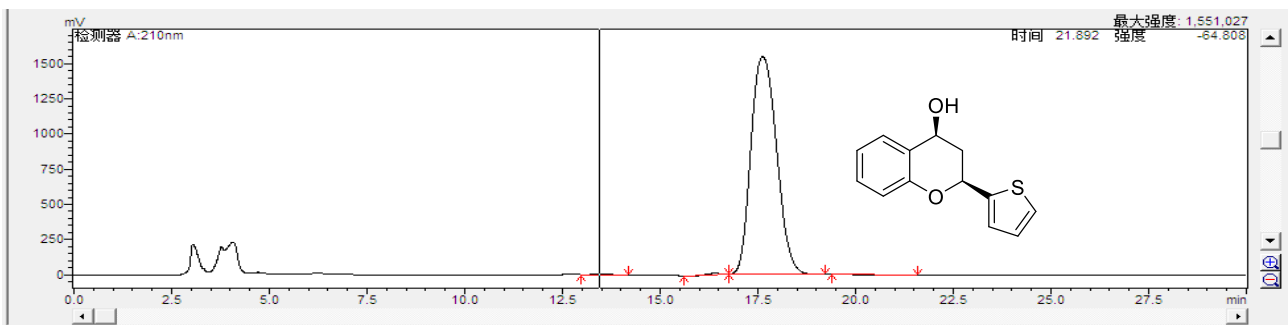

化合物表视图

| ID# | 名称       | 保留时间   | 峰# | 面积       | 高度      | 面积%     |
|-----|----------|--------|----|----------|---------|---------|
| 1   | RT13.454 | 13.454 | 1  | 70715    | 2651    | 0.0996  |
| 2   | RT16.401 | 16.401 | 2  | 168278   | 9585    | 0.2370  |
| 3   | RT17.623 | 17.623 | 3  | 70770769 | 1547843 | 99.6519 |
| 4   | RT19.408 | 19.408 | 4  | 8236     | -1      | 0.0116  |

**Translation of all characters (Chinese) in the above two frameworks to English is as follows:**

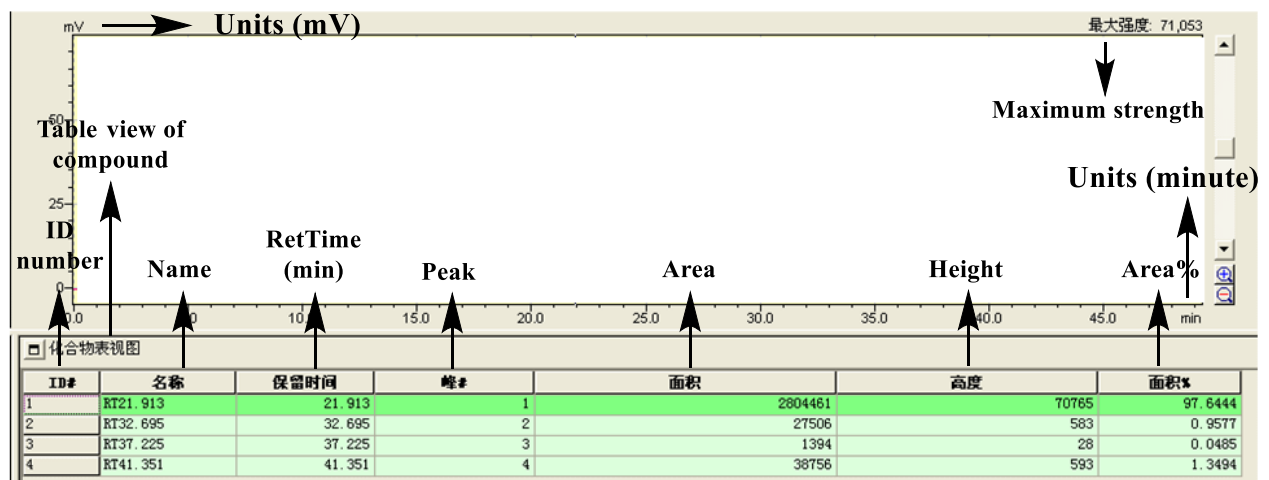

(S,S)-7ao: (2S,4S)-6-fluoro-2-phenylchroman-4-ol (HPLC: Chiracel AD-H, detected at 210 nm, eluent: n-hexane/2-propanol = 95/5, flow rate = 1.0mL/min, 25 °C).

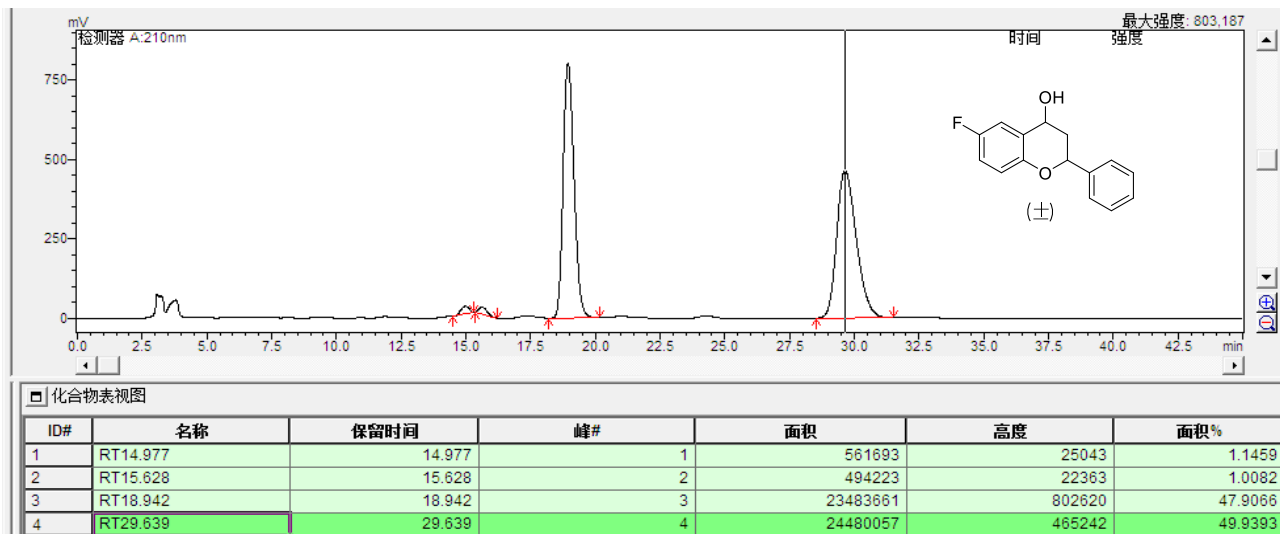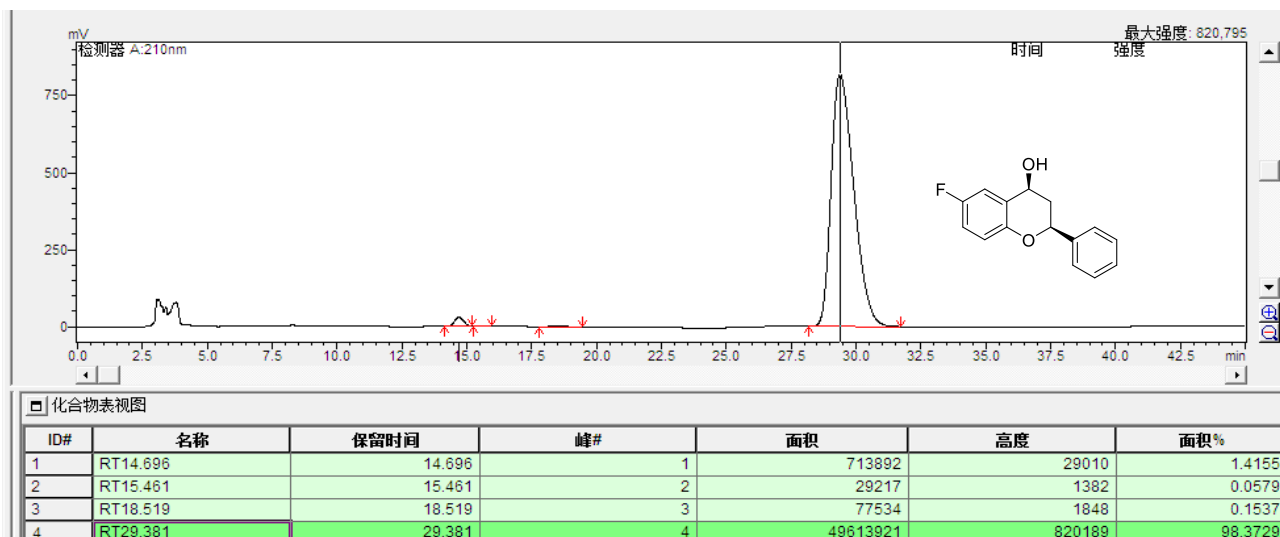

**Translation of all characters (Chinese) in the above two frameworks to English is as follows:**

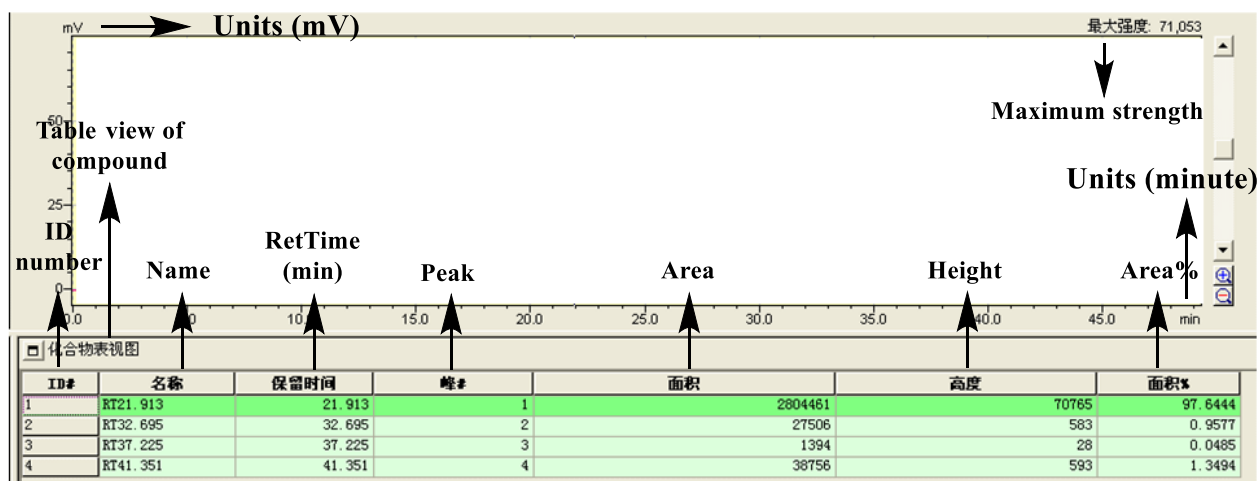



**(S,S)-7ap: (2S,4S)-6-chloro-2-phenylchroman-4-ol** (HPLC: Chiracel AD-H, detected at 210 nm, eluent: n-hexane/2-propanol = 95/5, flow rate = 1.0mL/min, 25 °C).

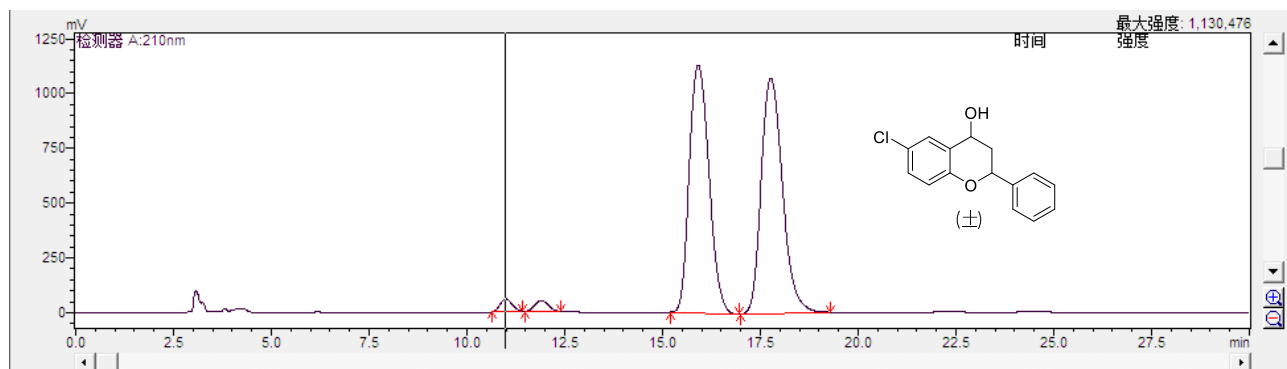

化合物表视图

| ID# | 名称       | 保留时间   | 峰# | 面积       | 高度      | 面积%     |
|-----|----------|--------|----|----------|---------|---------|
| 1   | RT10.990 | 10.990 | 1  | 1203343  | 57663   | 1.4506  |
| 2   | RT11.895 | 11.895 | 2  | 1176300  | 48948   | 1.4180  |
| 3   | RT15.909 | 15.909 | 3  | 39729393 | 1132246 | 47.8932 |
| 4   | RT17.765 | 17.765 | 4  | 40845122 | 1075474 | 49.2382 |

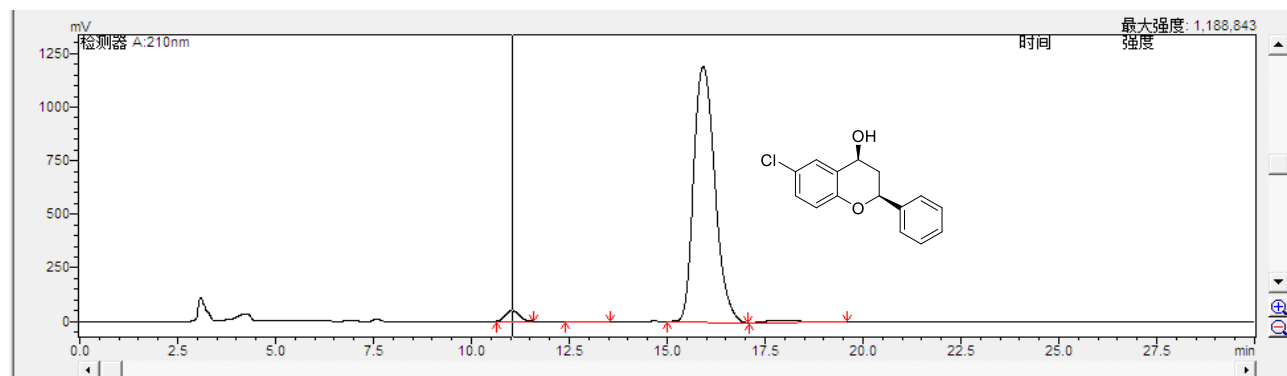

化合物表视图

| ID# | 名称       | 保留时间   | 峰# | 面积       | 高度      | 面积%     |
|-----|----------|--------|----|----------|---------|---------|
| 1   | RT11.032 | 11.032 | 1  | 1214796  | 50157   | 2.5904  |
| 2   | RT13.226 | 13.226 | 2  | 760      | 132     | 0.0016  |
| 3   | RT15.917 | 15.917 | 3  | 45028382 | 1191935 | 96.0173 |
| 4   | RT17.841 | 17.841 | 4  | 652151   | 10525   | 1.3906  |

**Translation of all characters (Chinese) in the above two frameworks to English is as follows:**



**(S,S)-7aq: (2S,4S)-6-bromo-2-phenylchroman-4-ol** (HPLC: Chiracel AD-H, detected at 210 nm, eluent: n-hexane/2-propanol = 95/5, flow rate = 1.0mL/min, 25 °C).

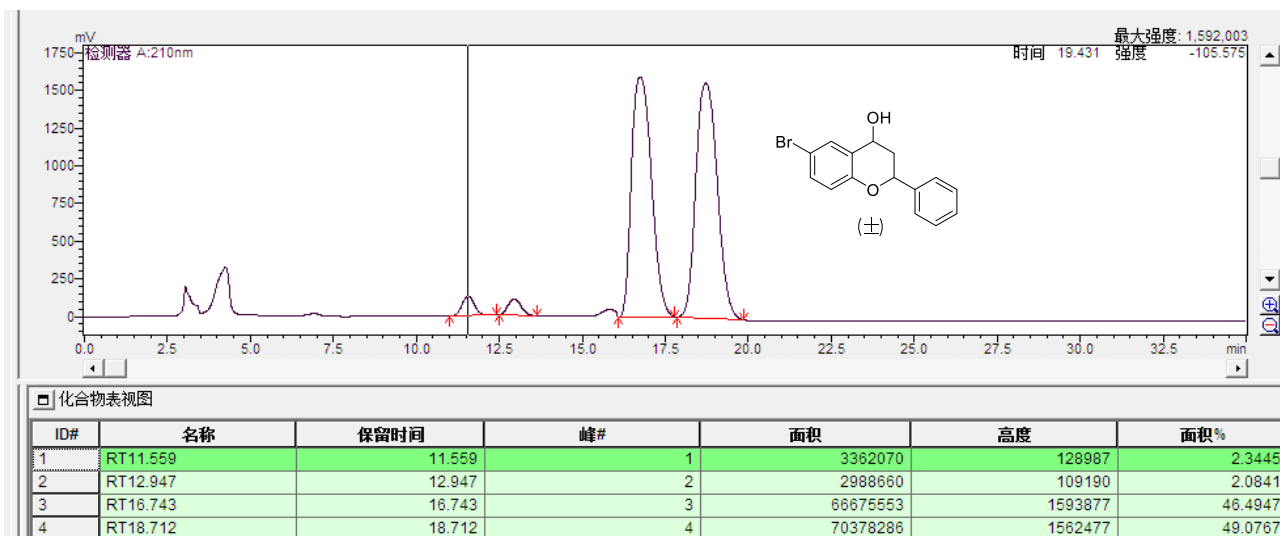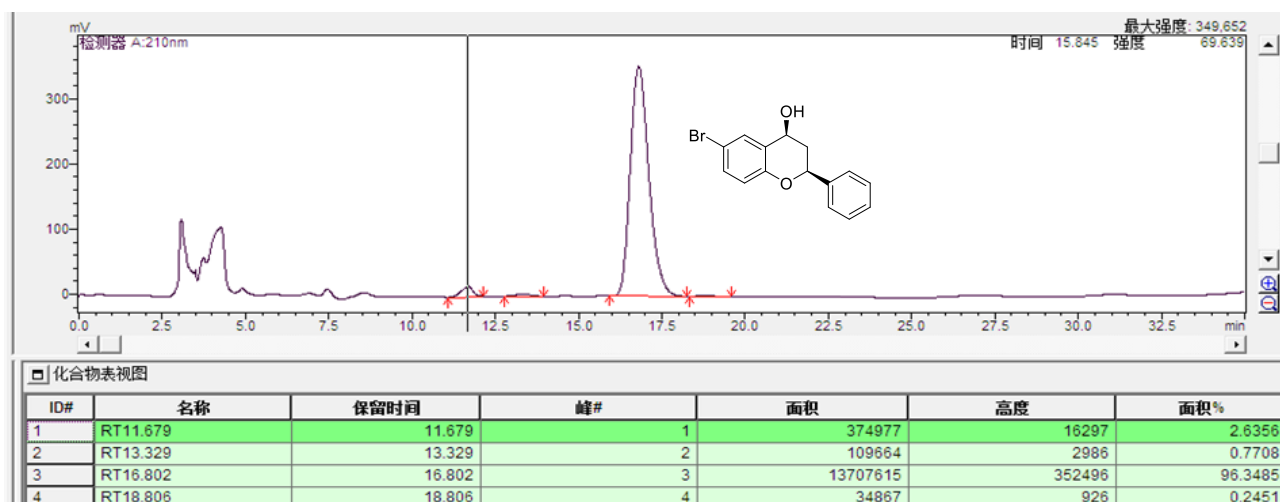

**Translation of all characters (Chinese) in the above two frameworks to English is as follows:**

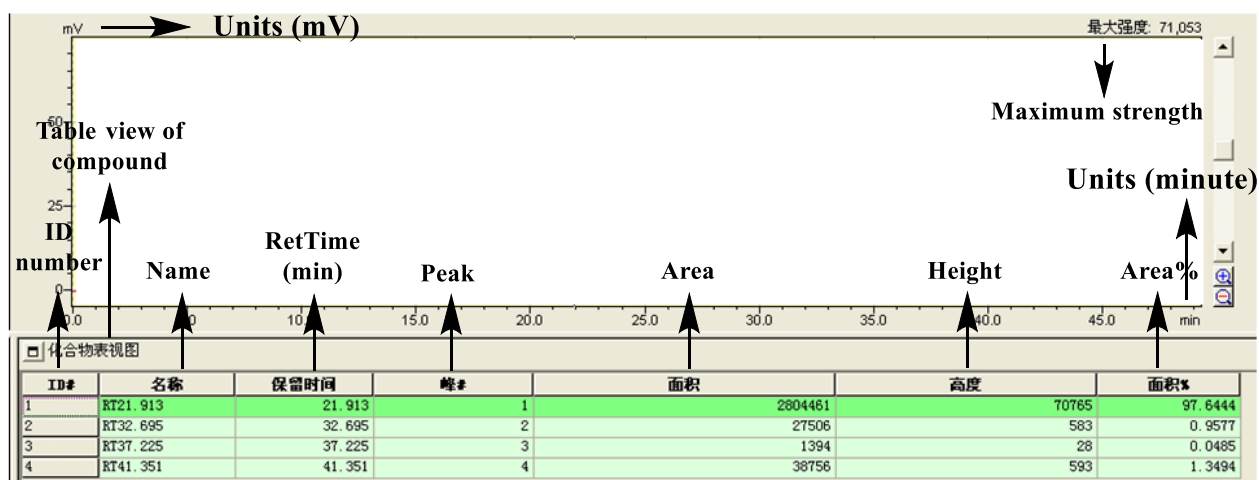

**(S,S)-7ar: (2S,4S)-6-methyl-2-phenylchroman-4-ol:** (HPLC: Chiracel AD-H, detected at 210 nm, eluent: n-hexane/2-propanol = 97/3, flow rate = 1.0mL/min, 25 °C).

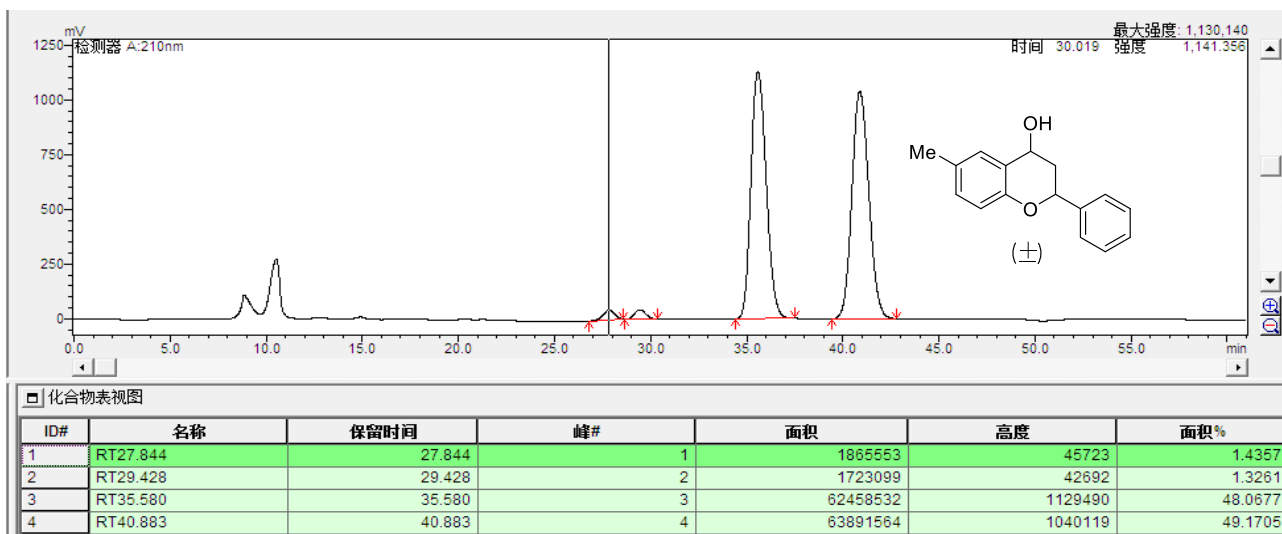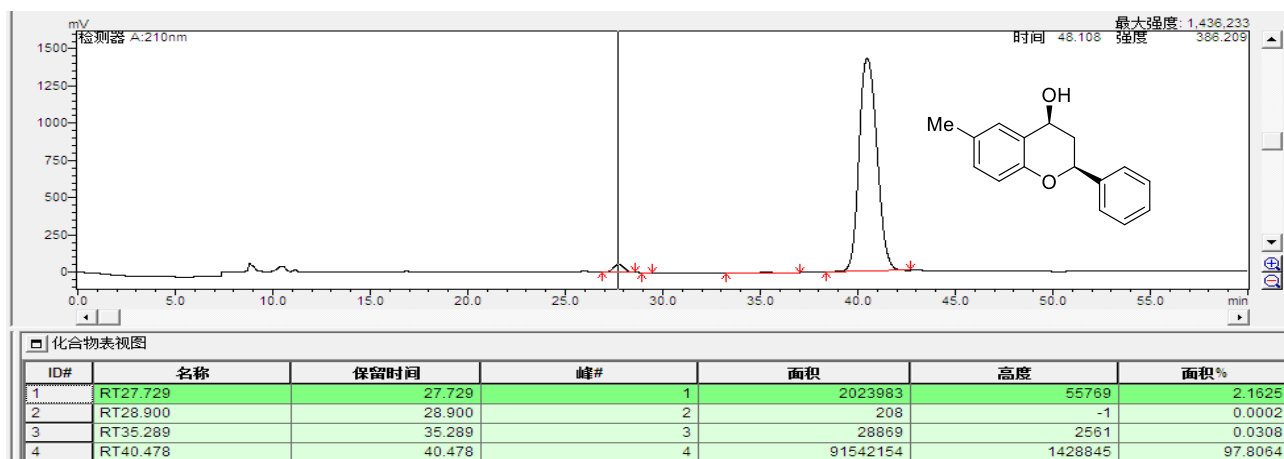

**Translation of all characters (Chinese) in the above two frameworks to English is as follows:**

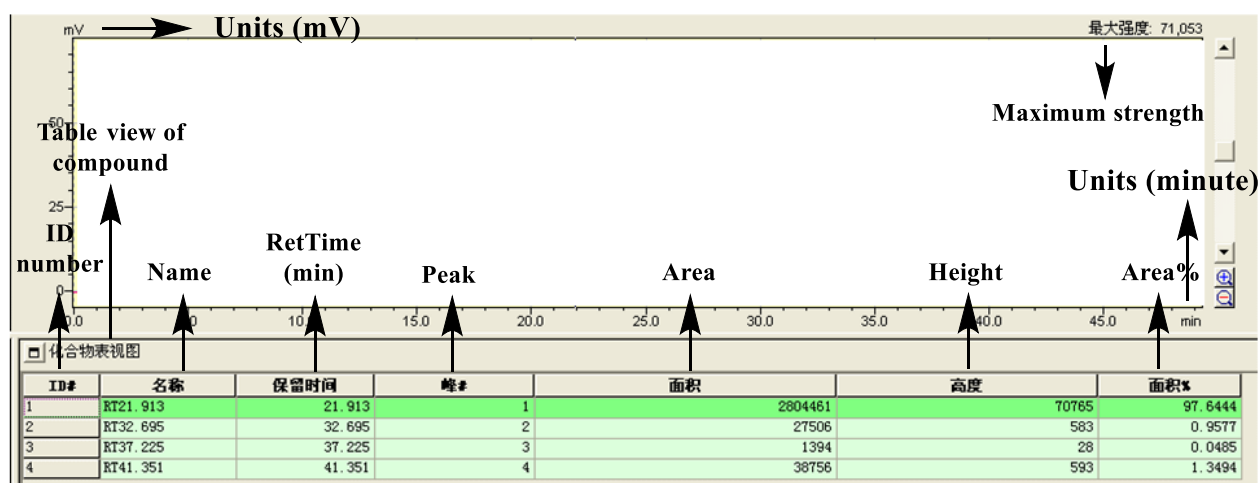

**(S,S)-7as: (2S,4S)-6-fluoro-2-(4-fluorophenyl)chroman-4-ol** (HPLC: Chiracel AD-H, detected at 210 nm, eluent: n-hexane/2-propanol = 95/5, flow rate = 1.0mL/min, 25 °C).

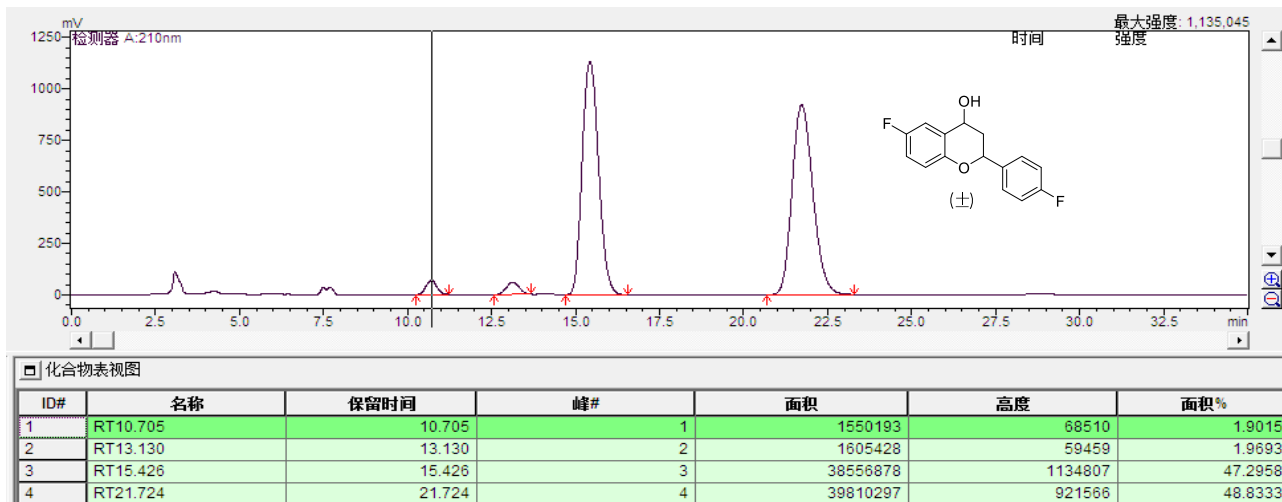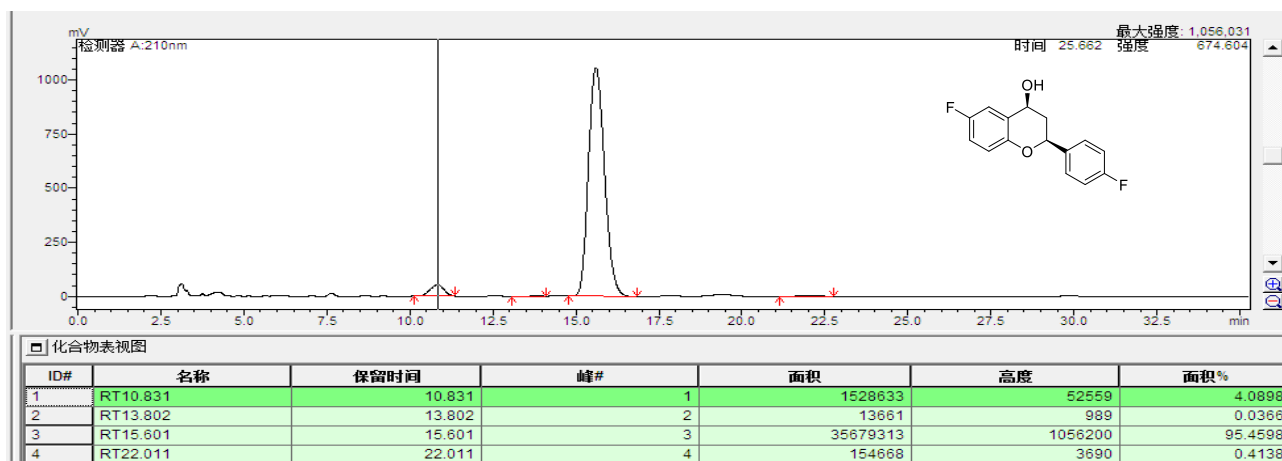

**Translation of all characters (Chinese) in the above two frameworks to English is as follows:**

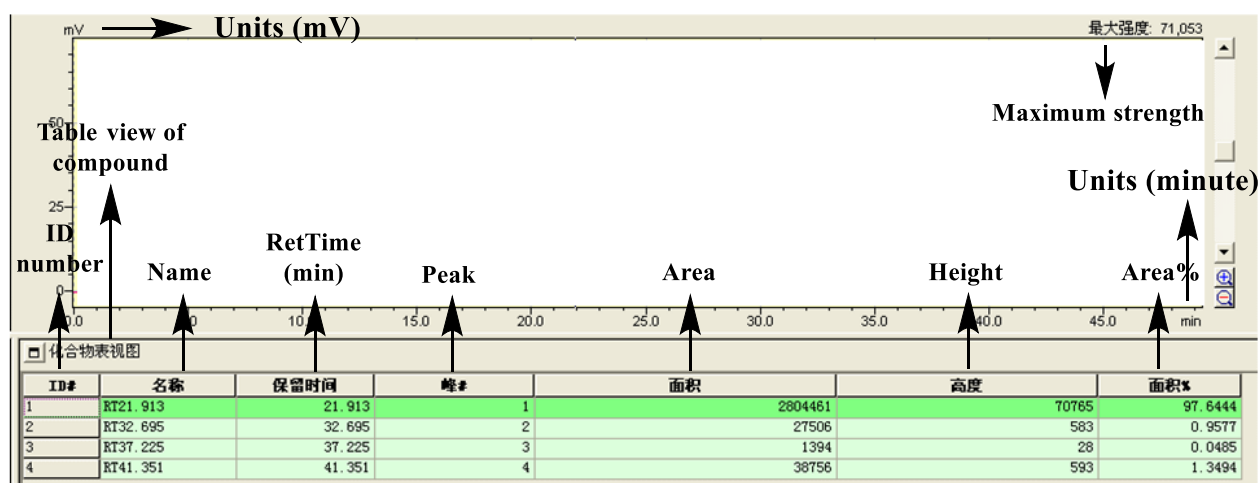

**(S,S)-7at: (2S,4S)-6-fluoro-2-(p-tolyl)chroman-4-ol:** (HPLC: Chiracel AD-H, detected at 210 nm, eluent: n-hexane/2-propanol = 95/5, flow rate = 1.0mL/min, 25 °C).

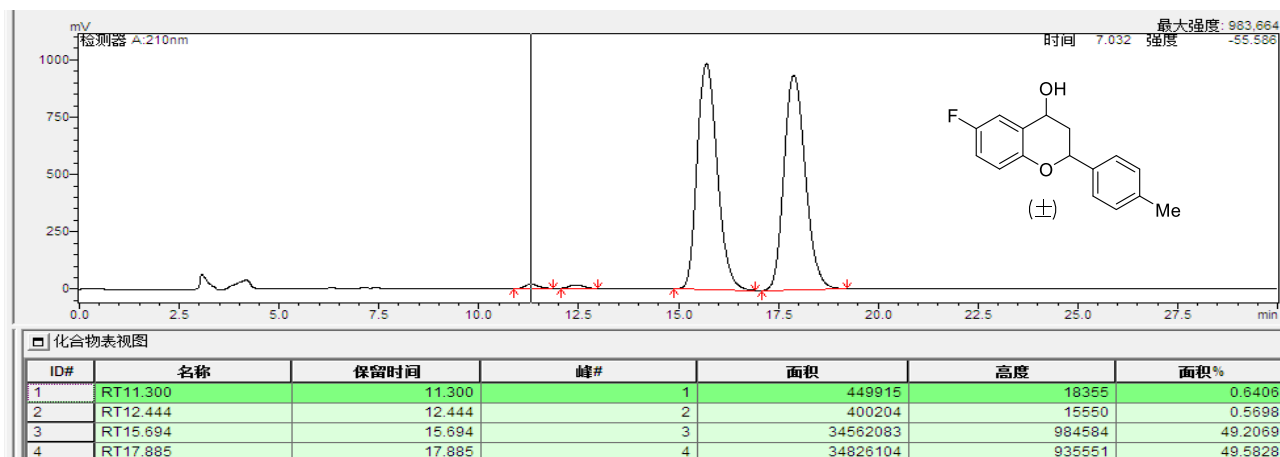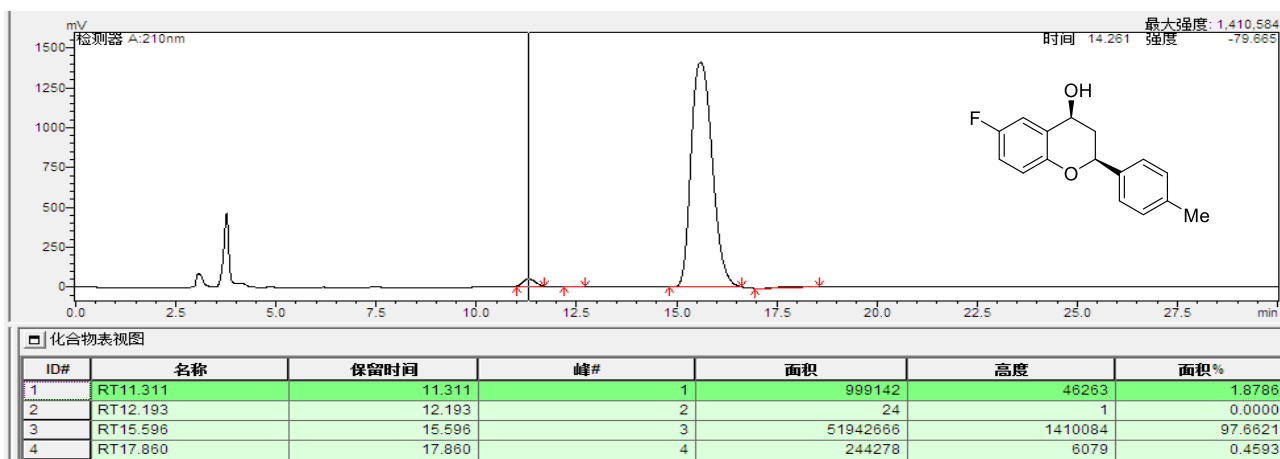

**Translation of all characters (Chinese) in the above two frameworks to English is as follows:**

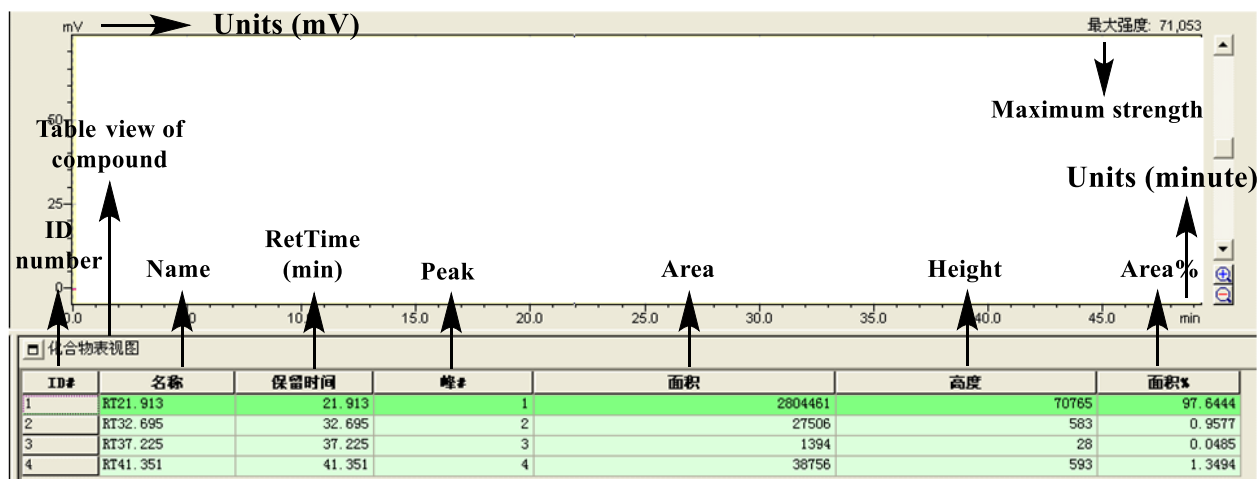

**(S,S)-7au: (2S,4S)-2-(3,4-difluorophenyl)-6-methylchroman-4-ol** (HPLC: Chiracel AD-H, detected at 210 nm, eluent: n-hexane/2-propanol = 97/3, flow rate = 1.0mL/min, 25 °C).

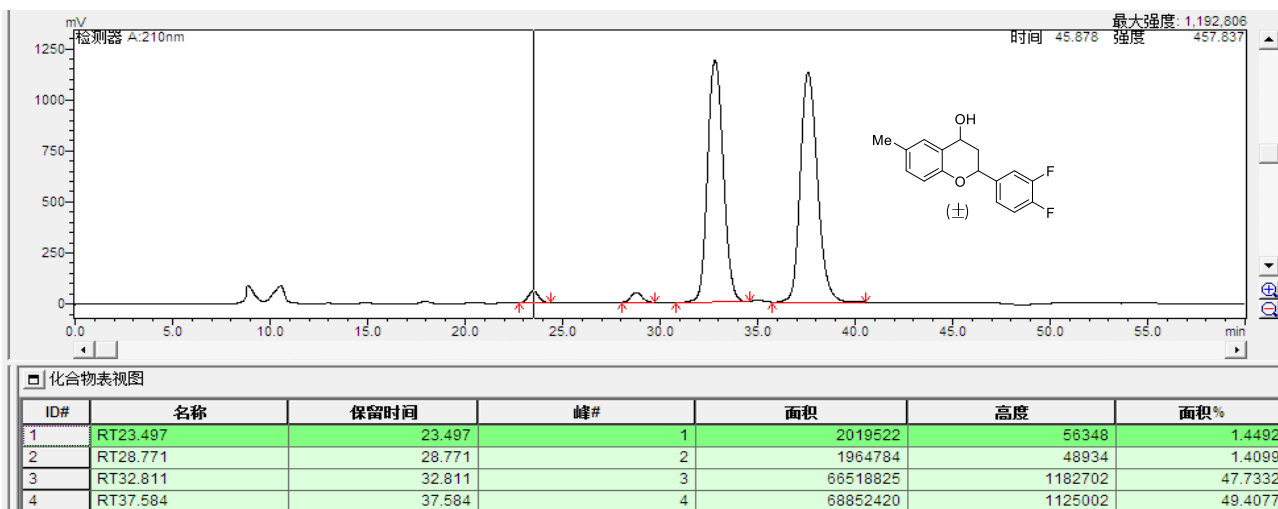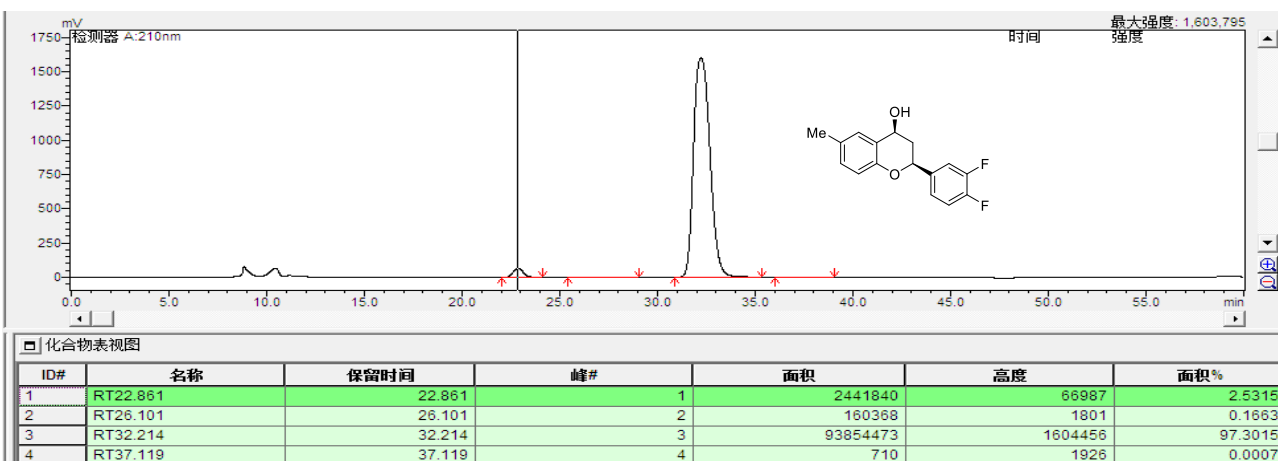

**Translation of all characters (Chinese) in the above two frameworks to English is as follows:**

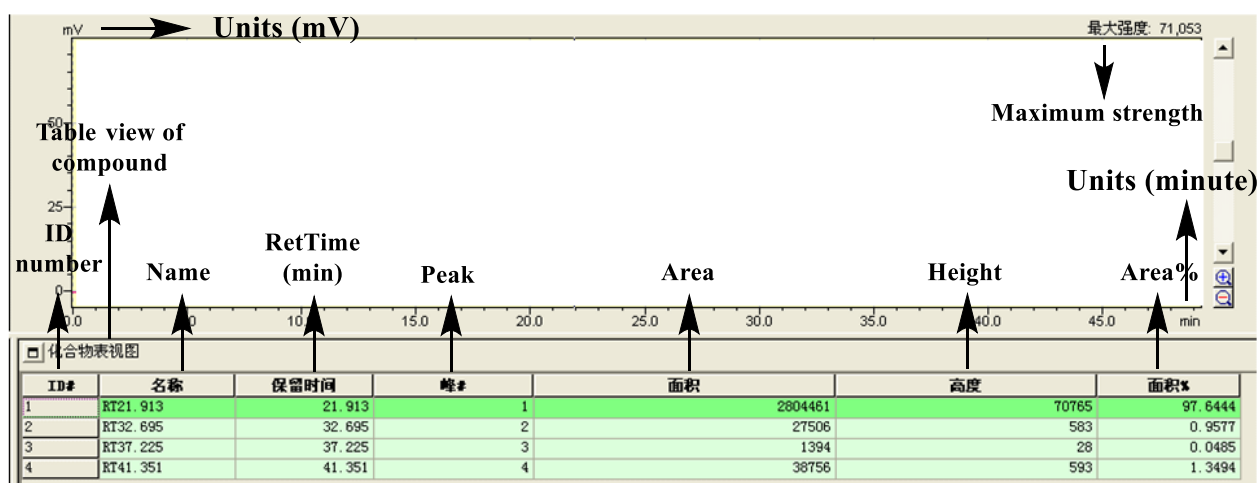

**(R,S)-7ba: (2R,4S)-2-methylchroman-4-ol** (HPLC: Chiracel AD-H, detected at 210 nm, eluent: n-hexane/2-propanol = 97/3, flow rate = 1.0mL/min, 25 °C).

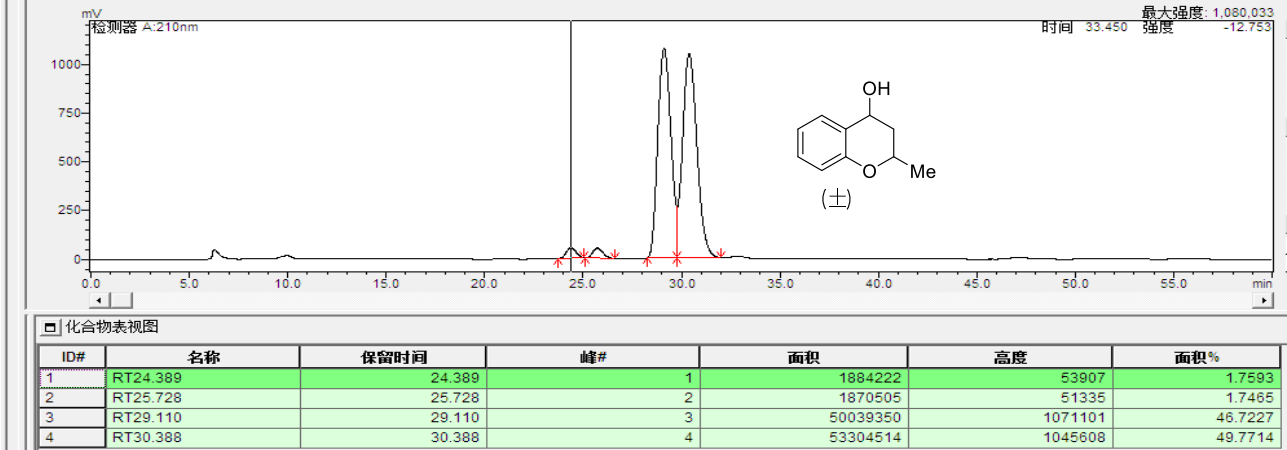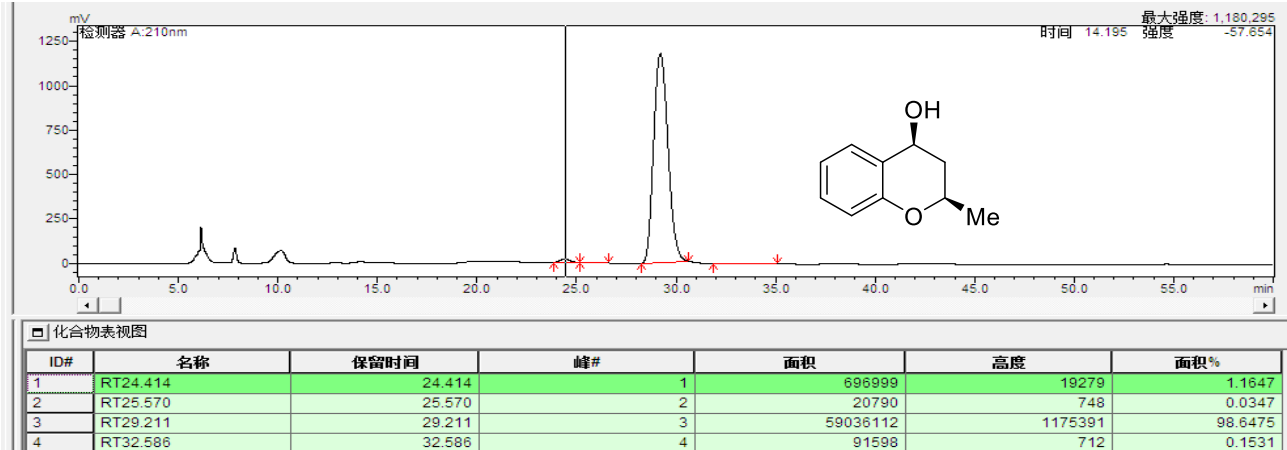

**Translation of all characters (Chinese) in the above two frameworks to English is as follows:**

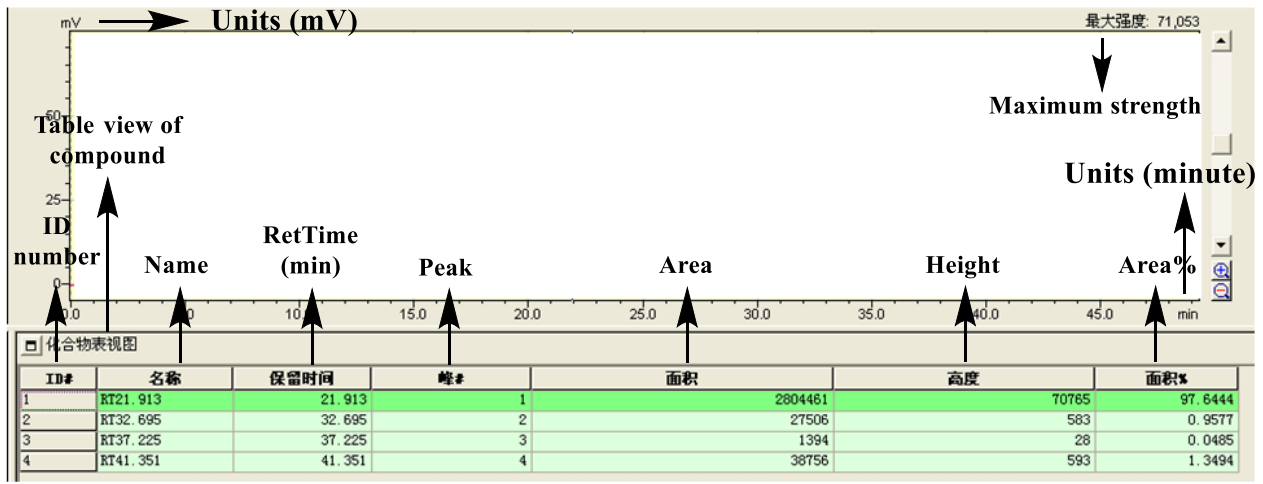

**(R,S)-7bb: (2R,4S)-2-ethylchroman-4-ol** (HPLC: Chiralcel AD-H, detected at 210 nm, eluent: n-hexane/2-propanol = 99/1, flow rate = 1.0 mL/min, 25 °C).

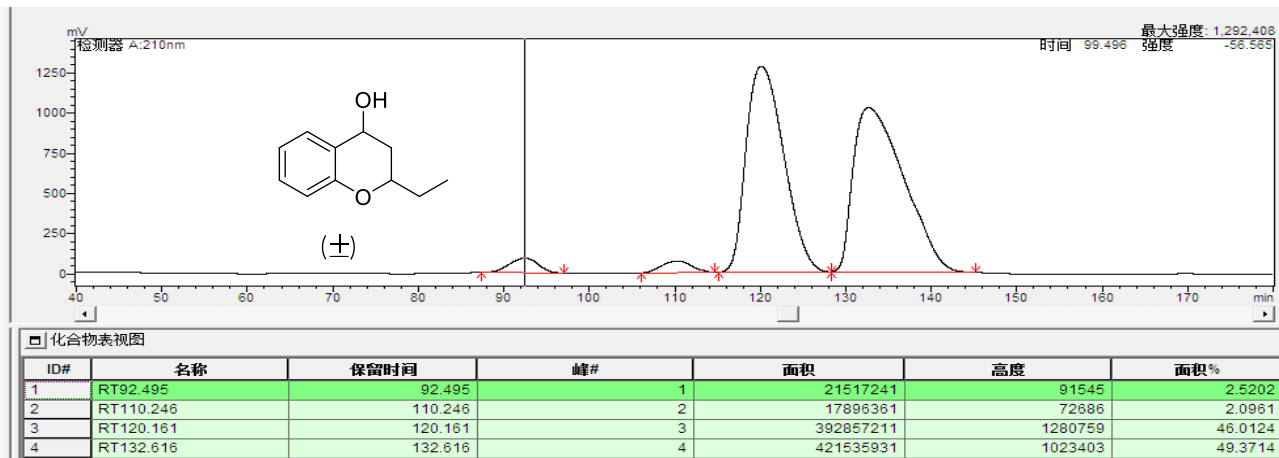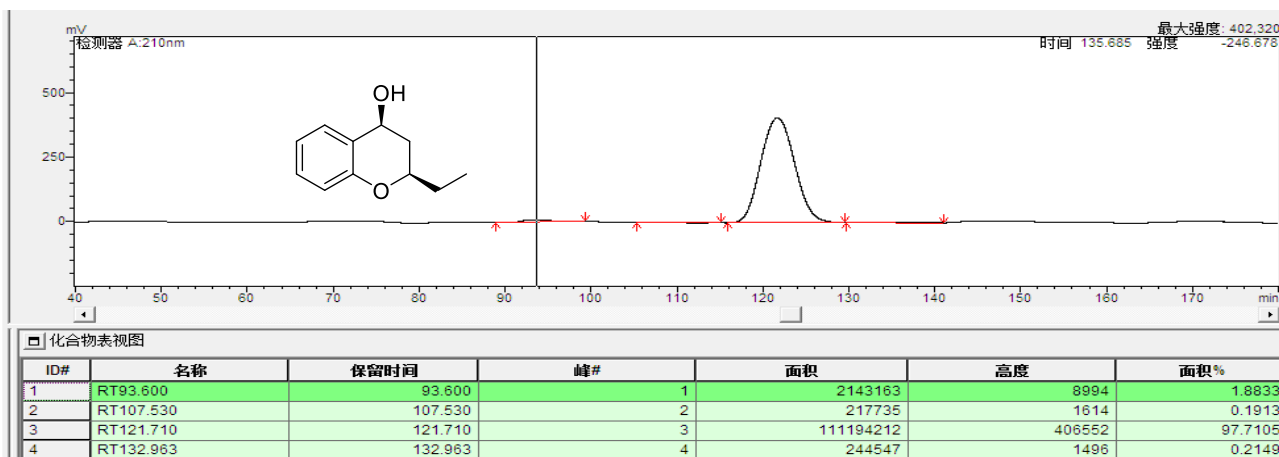

**Translation of all characters (Chinese) in the above two frameworks to English is as follows:**





**(R,S)-7bc: (2R,4S)-2-propylchroman-4-ol** (HPLC: Chiracel AD-H, detected at 210 nm, eluent: n-hexane/2-propanol = 99/1, flow rate = 1.0mL/min, 25 °C).

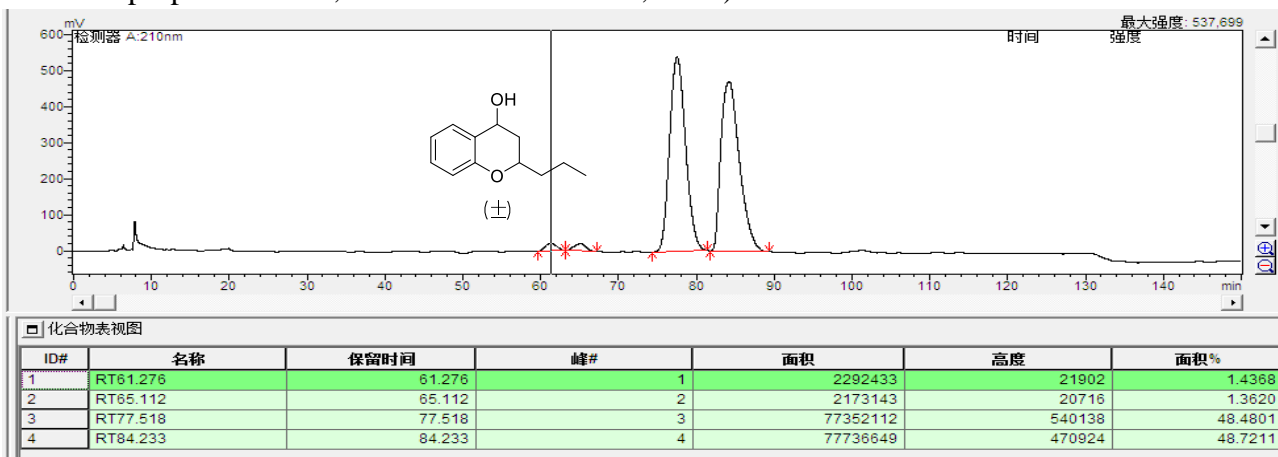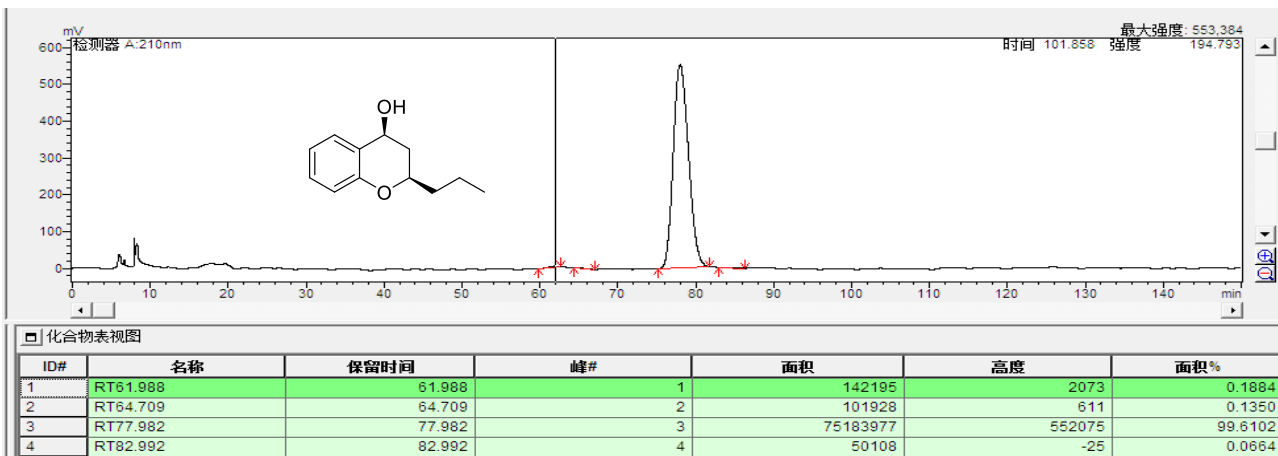

**Translation of all characters (Chinese) in the above two frameworks to English is as follows:**

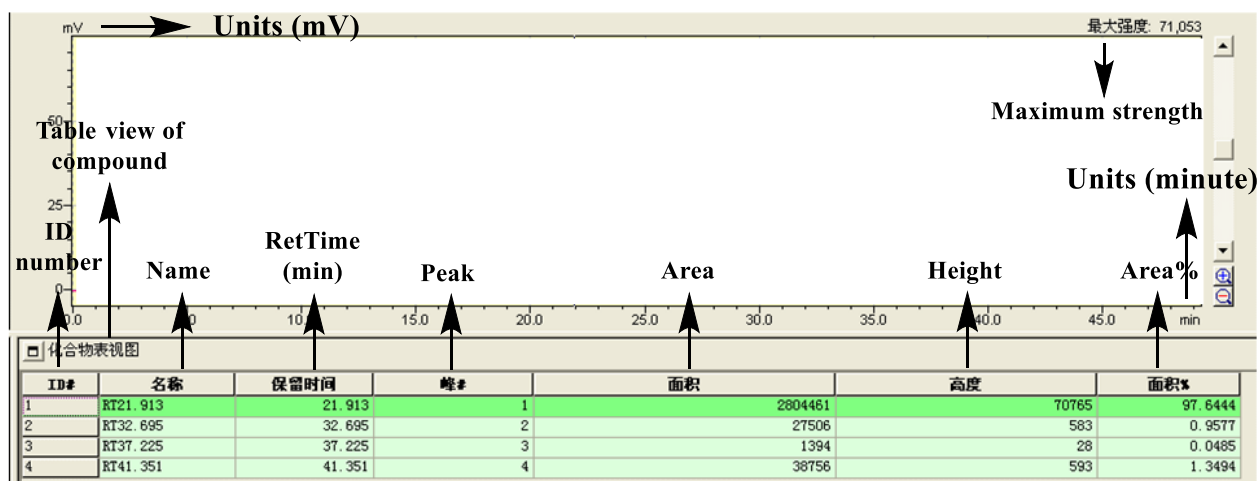

**(S,S)-7bd:** (2S,4S)-2-isopropylchroman-4-ol (HPLC: Chiracel AD-H, detected at 210 nm, eluent: n-hexane/2-propanol = 98/2, flow rate = 1.0mL/min, 25 °C).

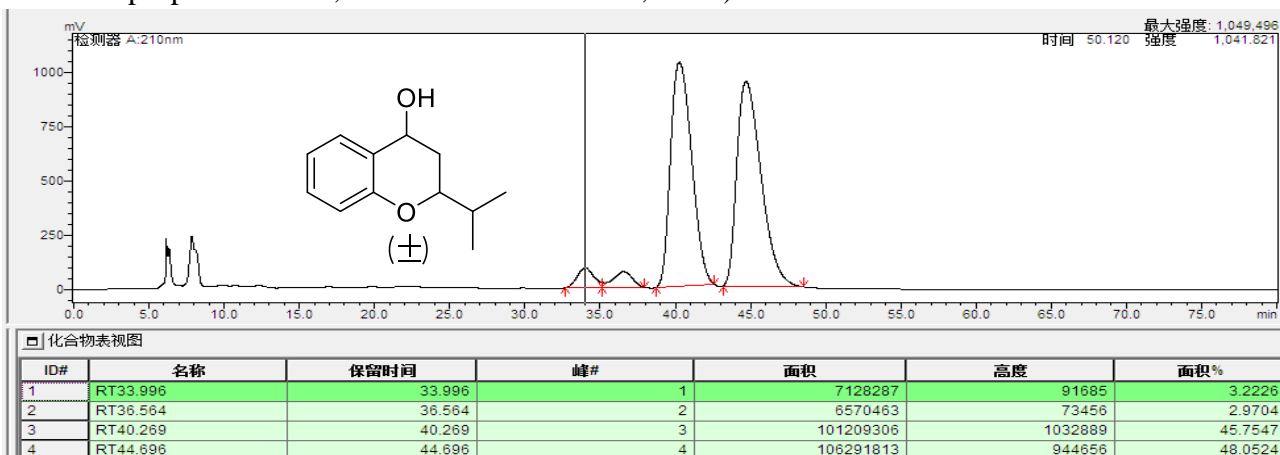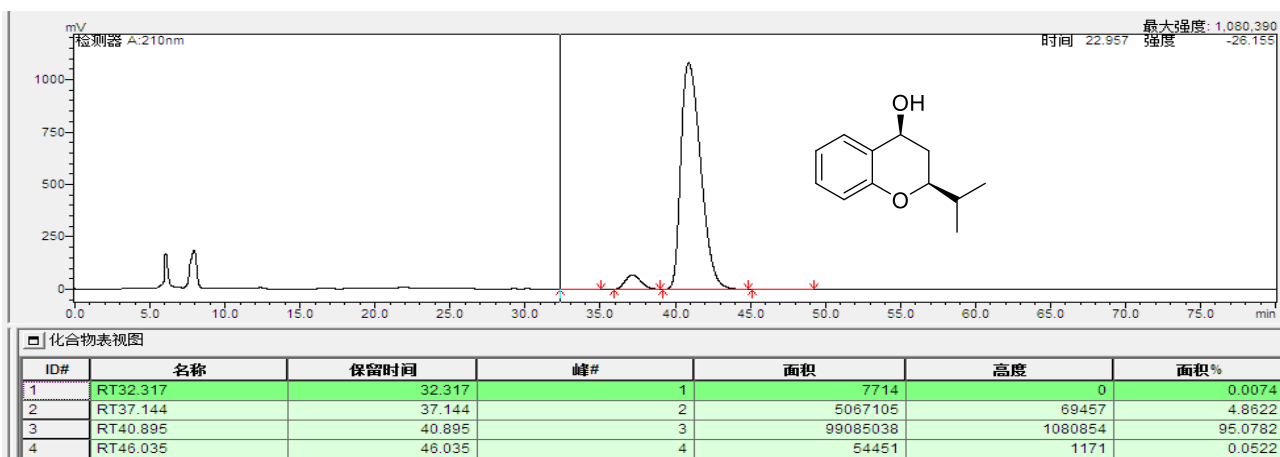

**Translation of all characters (Chinese) in the above two frameworks to English is as follows:**



**(R,S)-7be: (2R,4S)-2-isobutylchroman-4-ol** (HPLC: Chiracel AD-H, detected at 210 nm, eluent: n-hexane/2-propanol = 97/3, flow rate = 1.0mL/min, 25 °C).

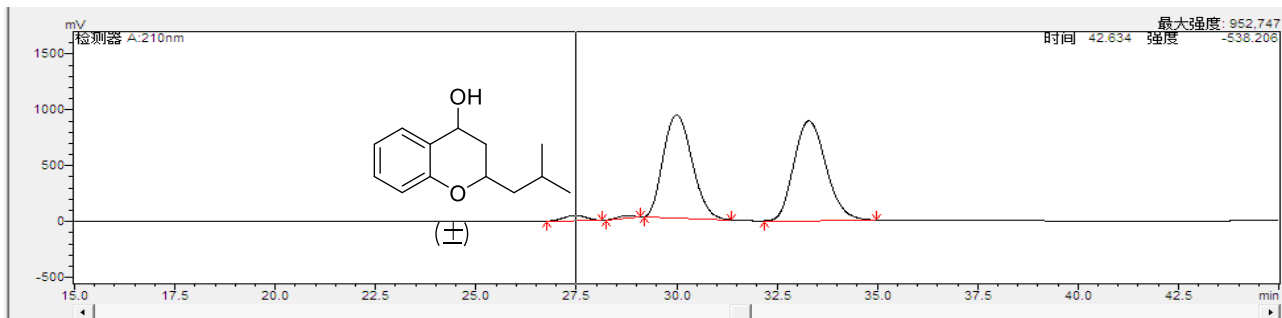

化合物表视图

| ID# | 名称       | 保留时间   | 峰# | 面积       | 高度     | 面积%     |
|-----|----------|--------|----|----------|--------|---------|
| 1   | RT27.473 | 27.473 | 1  | 1768821  | 46114  | 1.7929  |
| 2   | RT28.783 | 28.783 | 2  | 735798   | 25579  | 0.7458  |
| 3   | RT29.995 | 29.995 | 3  | 46338900 | 922460 | 46.9708 |
| 4   | RT33.291 | 33.291 | 4  | 49811086 | 893342 | 50.4904 |

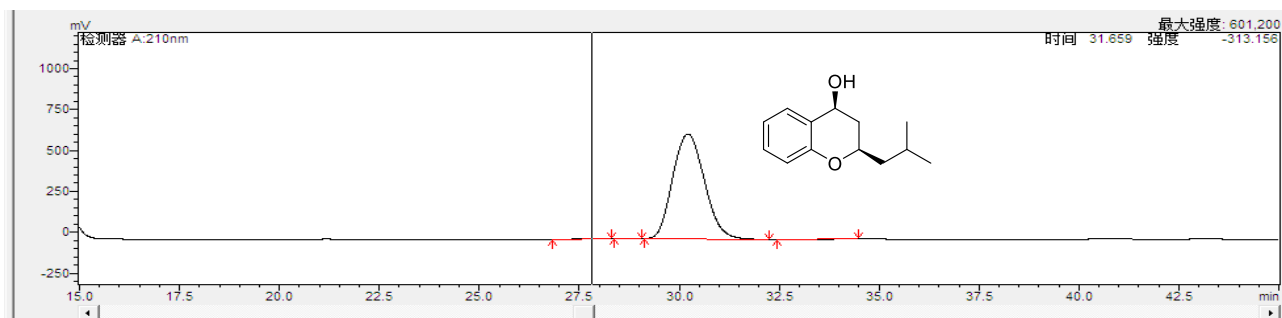

化合物表视图

| ID# | 名称       | 保留时间   | 峰# | 面积       | 高度     | 面积%     |
|-----|----------|--------|----|----------|--------|---------|
| 1   | RT27.807 | 27.807 | 1  | 216668   | 5192   | 0.6036  |
| 2   | RT28.863 | 28.863 | 2  | 18324    | 748    | 0.0510  |
| 3   | RT30.214 | 30.214 | 3  | 35581135 | 642150 | 99.1181 |
| 4   | RT34.229 | 34.229 | 4  | 81591    | 569    | 0.2273  |

**Translation of all characters (Chinese) in the above two frameworks to English is as follows:**

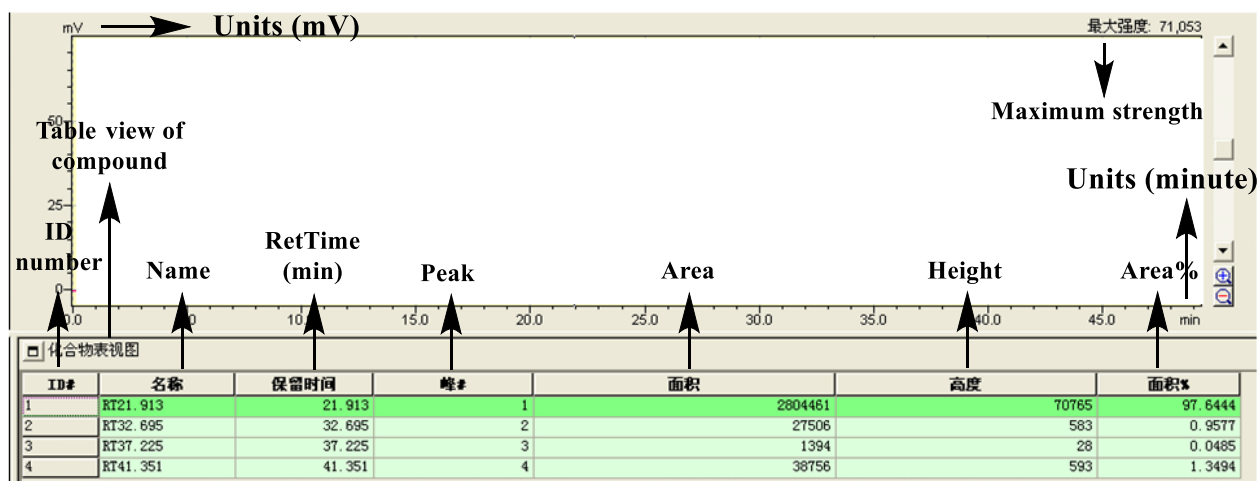

(*S,S*)-7bf: (2*S*,4*S*)-2-(*tert*-butyl)chroman-4-ol (HPLC: Chiracel AD-H, detected at 210 nm, eluent: n-hexane/2-propanol = 99/1, flow rate = 1.0mL/min, 25 °C).

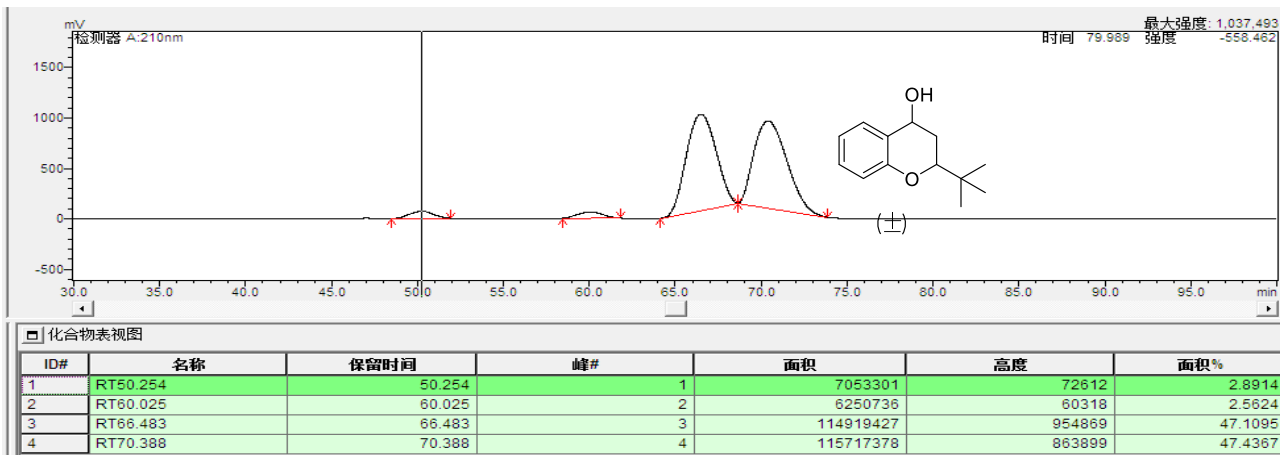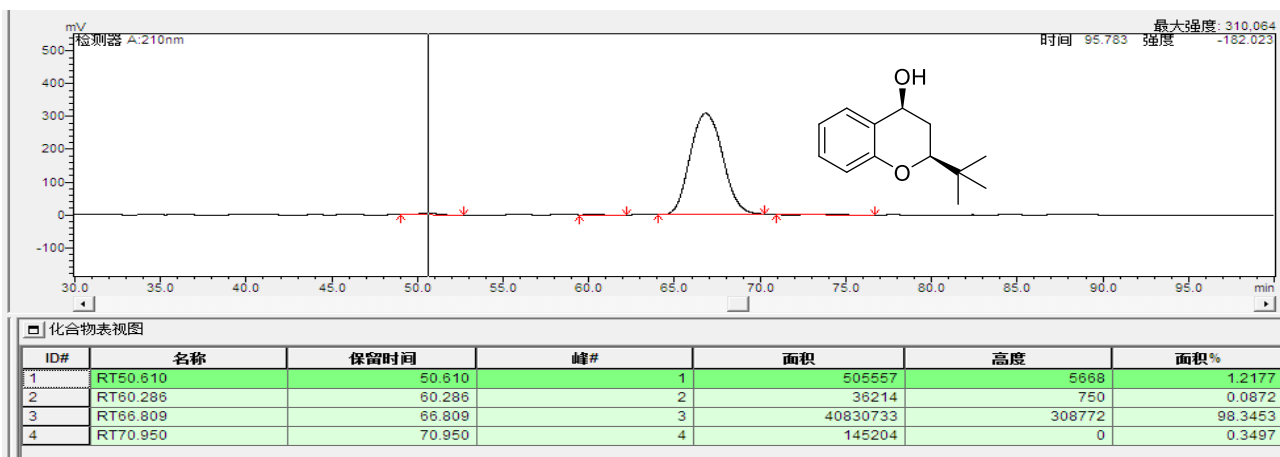

**Translation of all characters (Chinese) in the above two frameworks to English is as follows:**



**(R,S)-7bg:** (2R,4S)-6-chloro-2-methylchroman-4-ol (HPLC: Chiracel AD-H, detected at 210 nm, eluent: n-hexane/2-propanol = 95/5, flow rate = 1.0mL/min, 25 °C).

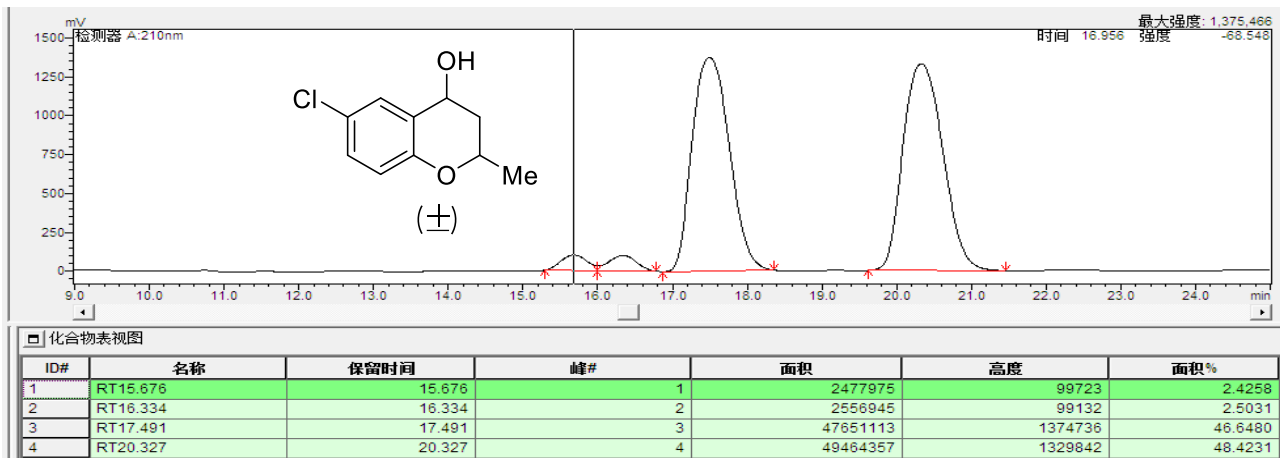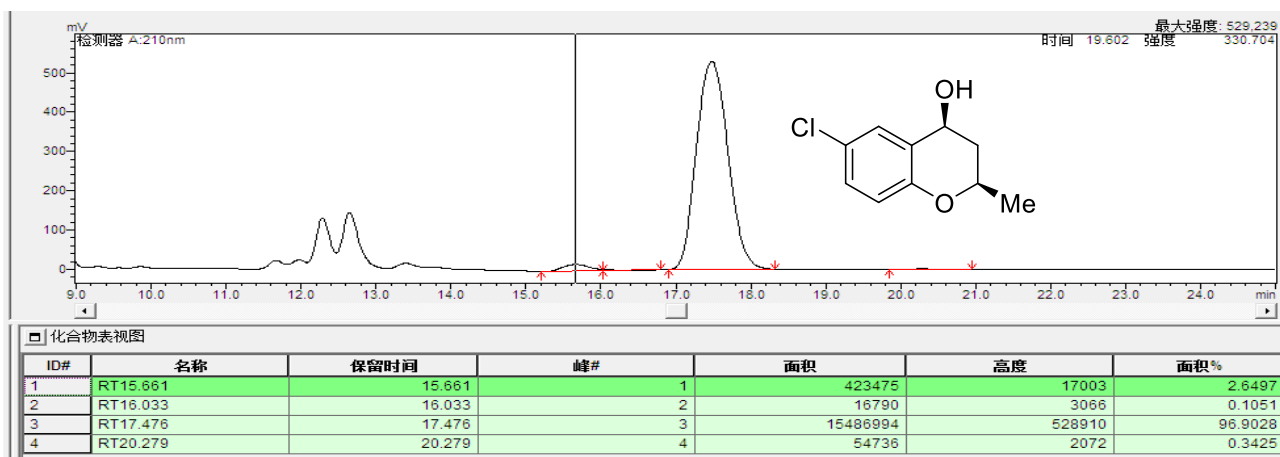

**Translation of all characters (Chinese) in the above two frameworks to English is as follows:**



**(S,S)-7bh: (2S,4S)-6-chloro-2-isopropylchroman-4-ol:** (HPLC: Chiracel AD-H, detected at 210 nm, eluent: n-hexane/2-propanol = 97/3, flow rate = 1.0mL/min, 25 °C).

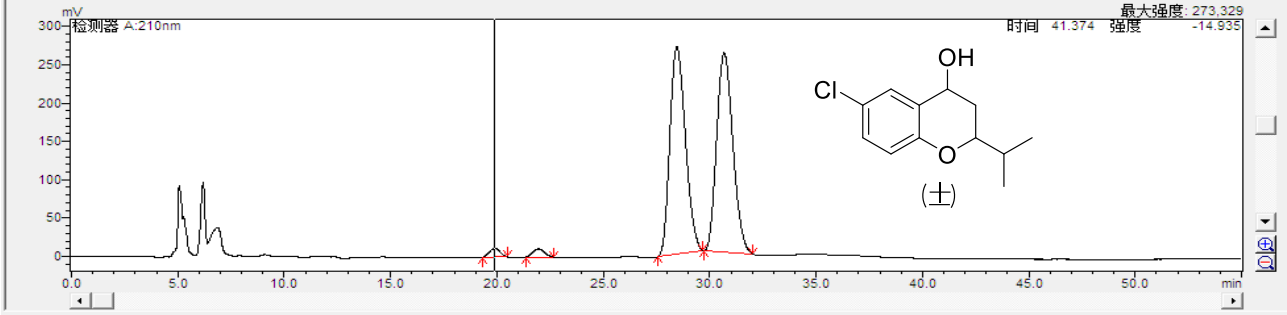

化合物表视图

| ID# | 名称       | 保留时间   | 峰# | 面积       | 高度     | 面积%     |
|-----|----------|--------|----|----------|--------|---------|
| 1   | RT19.891 | 19.891 | 1  | 391103   | 11226  | 1.3778  |
| 2   | RT21.941 | 21.941 | 2  | 412379   | 10733  | 1.4527  |
| 3   | RT28.454 | 28.454 | 3  | 13736704 | 270359 | 48.3912 |
| 4   | RT30.678 | 30.678 | 4  | 13846598 | 260429 | 48.7783 |

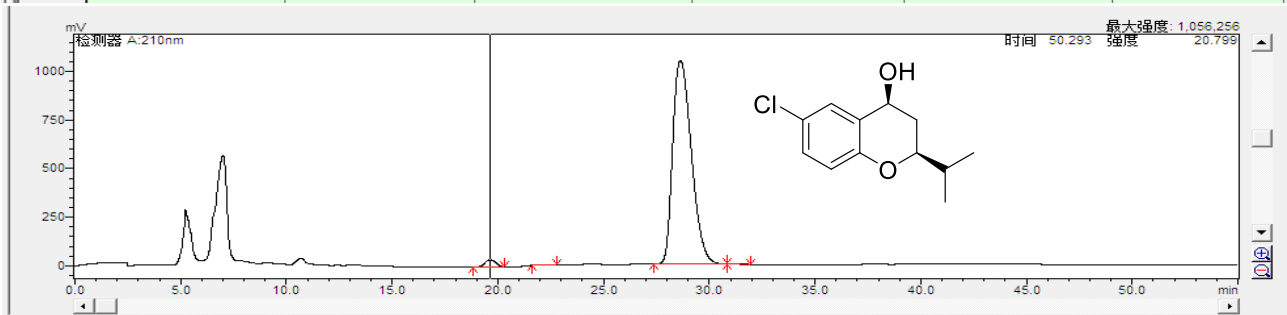

化合物表视图

| ID# | 名称       | 保留时间   | 峰# | 面积       | 高度      | 面积%     |
|-----|----------|--------|----|----------|---------|---------|
| 1   | RT19.632 | 19.632 | 1  | 1352507  | 38116   | 2.0563  |
| 2   | RT22.337 | 22.337 | 2  | 62596    | 1750    | 0.0800  |
| 3   | RT28.630 | 28.630 | 3  | 64365632 | 1047963 | 97.8583 |
| 4   | RT30.875 | 30.875 | 4  | 3598     | 8       | 0.0055  |

**Translation of all characters (Chinese) in the above two frameworks to English is as follows:**

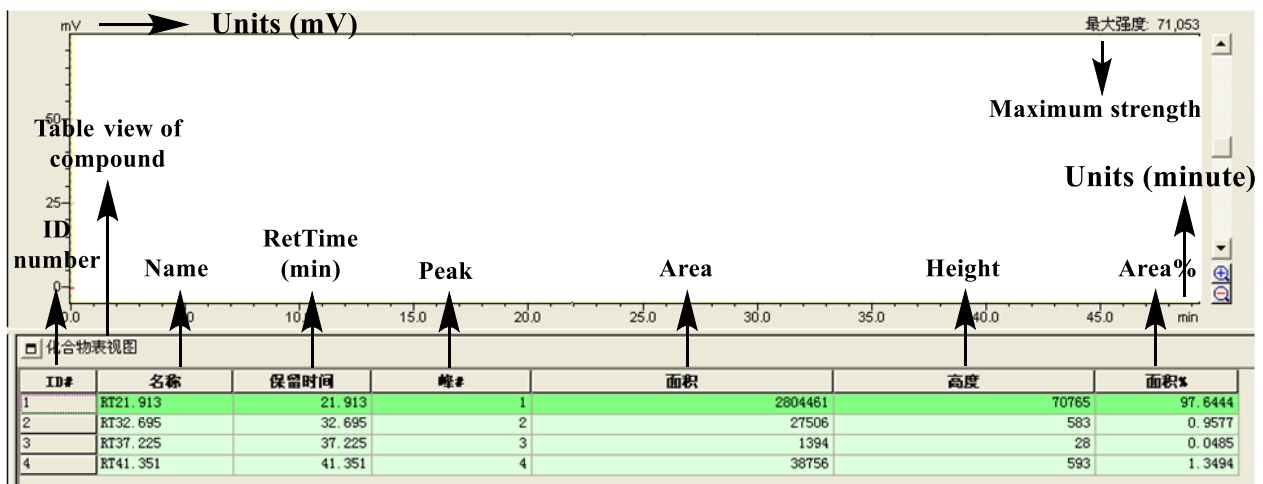

**(R,S)-7bi:** (2*R*,4*S*)-6-chloro-2-isobutylchroman-4-ol (HPLC: Chiracel AD-H, detected at 210 nm, eluent: n-hexane/2-propanol = 95/5, flow rate = 1.0mL/min, 25 °C).

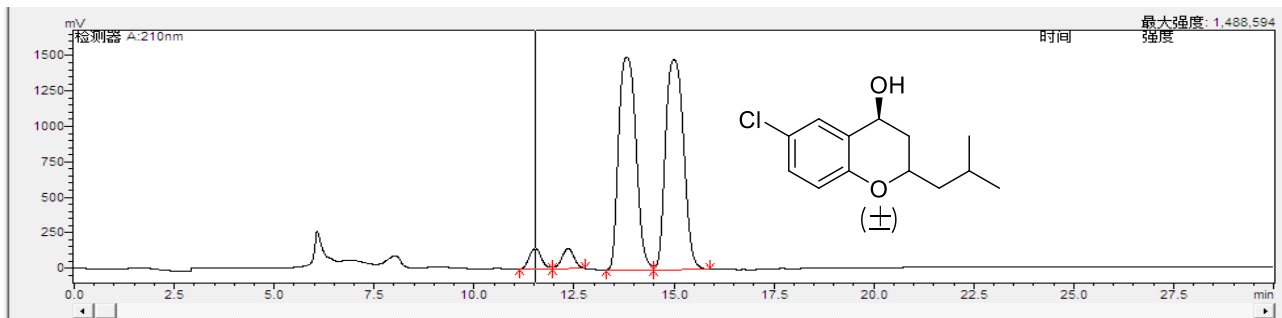

| ID# | 名称       | 保留时间   | 峰# | 面积       | 高度      | 面积%     |
|-----|----------|--------|----|----------|---------|---------|
| 1   | RT11.529 | 11.529 | 1  | 2988315  | 142669  | 3.0468  |
| 2   | RT12.351 | 12.351 | 2  | 3014040  | 139803  | 3.0730  |
| 3   | RT13.821 | 13.821 | 3  | 45370192 | 1501677 | 46.2583 |
| 4   | RT15.002 | 15.002 | 4  | 46707478 | 1482224 | 47.6218 |

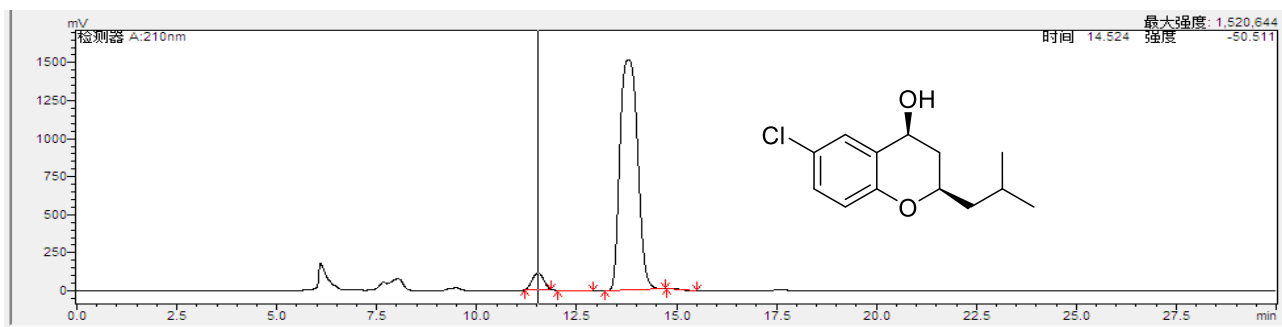

| ID# | 名称       | 保留时间   | 峰# | 面积       | 高度      | 面积%     |
|-----|----------|--------|----|----------|---------|---------|
| 1   | RT11.535 | 11.535 | 1  | 2139207  | 108518  | 4.3895  |
| 2   | RT12.412 | 12.412 | 2  | 2799     | 694     | 0.0057  |
| 3   | RT13.793 | 13.793 | 3  | 46584708 | 1518235 | 95.5877 |
| 4   | RT14.903 | 14.903 | 4  | 8348     | 3626    | 0.0171  |

**Translation of all characters (Chinese) in the above two frameworks to English is as follows:**

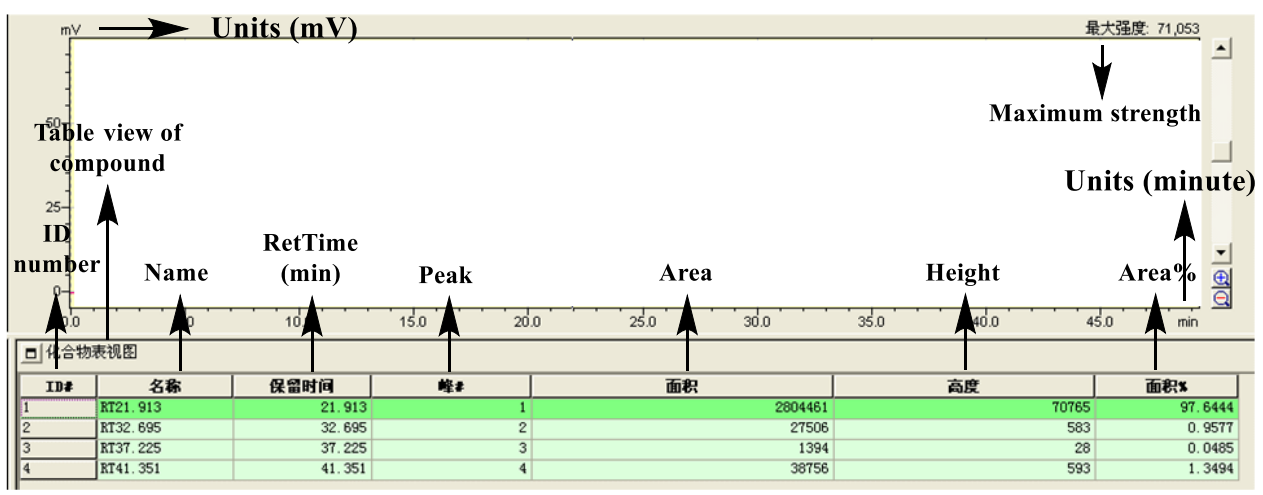

**(S,S)-7bj:** (2*S*,4*S*)-2-(*tert*-butyl)-6-chlorochroman-4-ol (HPLC: Chiracel AD-H, detected at 210 nm, eluent: n-hexane/2-propanol = 97/3, flow rate = 1.0mL/min, 25 °C).

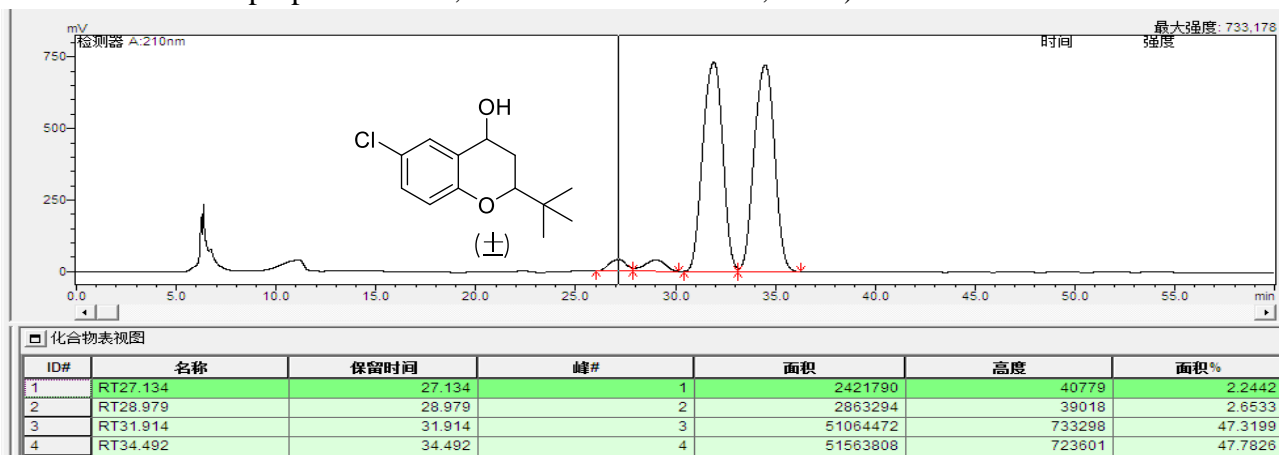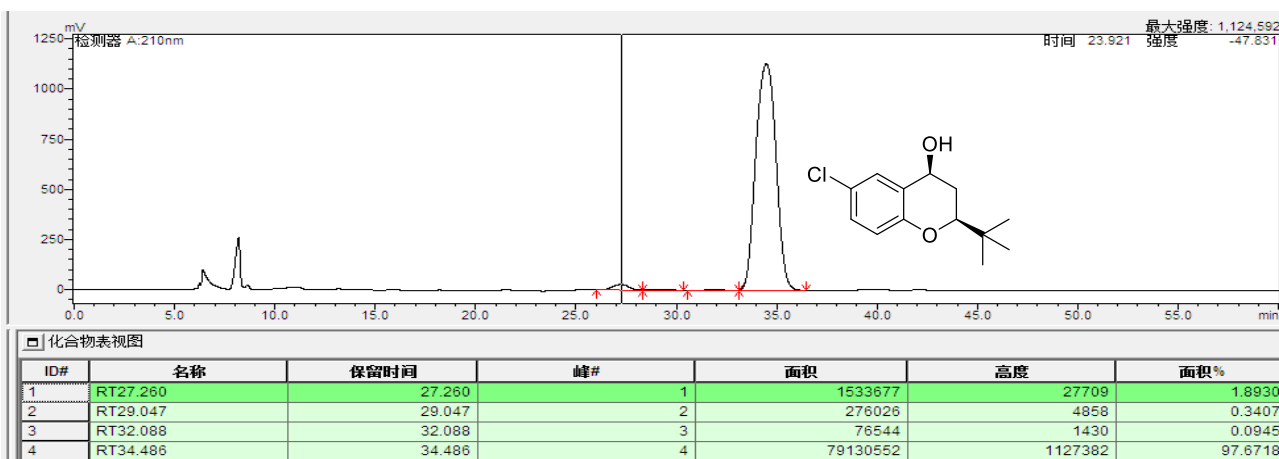

**Translation of all characters (Chinese) in the above two frameworks to English is as follows:**





**(S,S)-7bk: (2S,4S)-6-bromo-2-isopropylchroman-4-ol:** (HPLC: Chiracel AD-H, detected at 210 nm, eluent: n-hexane/2-propanol = 97/3, flow rate = 1.0mL/min, 25 °C).

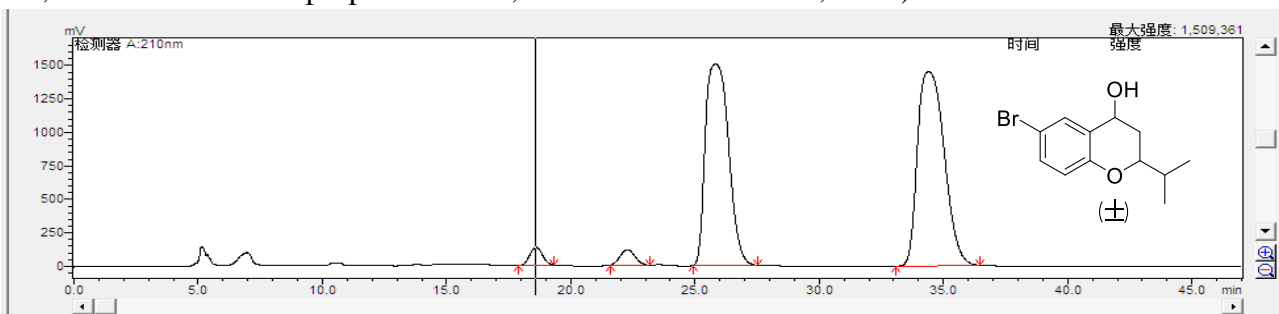

化合物表视图

| ID# | 名称       | 保留时间   | 峰# | 面积        | 高度      | 面积%     |
|-----|----------|--------|----|-----------|---------|---------|
| 1   | RT18.602 | 18.602 | 1  | 4696688   | 133876  | 2.1765  |
| 2   | RT22.278 | 22.278 | 2  | 4697310   | 114525  | 2.1768  |
| 3   | RT25.826 | 25.826 | 3  | 97790605  | 1501434 | 45.3180 |
| 4   | RT34.391 | 34.391 | 4  | 108602768 | 1451831 | 50.3286 |

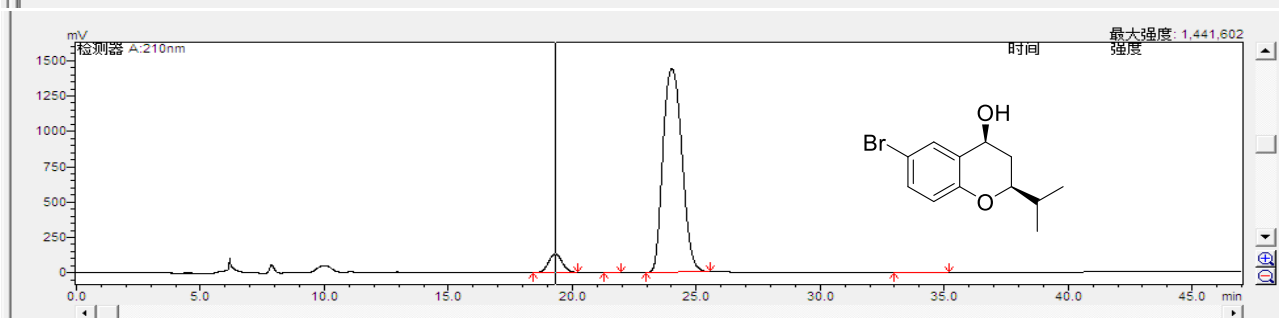

化合物表视图

| ID# | 名称       | 保留时间   | 峰# | 面积       | 高度      | 面积%     |
|-----|----------|--------|----|----------|---------|---------|
| 1   | RT19.312 | 19.312 | 1  | 4882692  | 130080  | 5.9767  |
| 2   | RT21.782 | 21.782 | 2  | 5873     | 242     | 0.0072  |
| 3   | RT24.017 | 24.017 | 3  | 76795717 | 1437084 | 94.0024 |
| 4   | RT34.397 | 34.397 | 4  | 11238    | 430     | 0.0138  |

**Translation of all characters (Chinese) in the above two frameworks to English is as follows:**

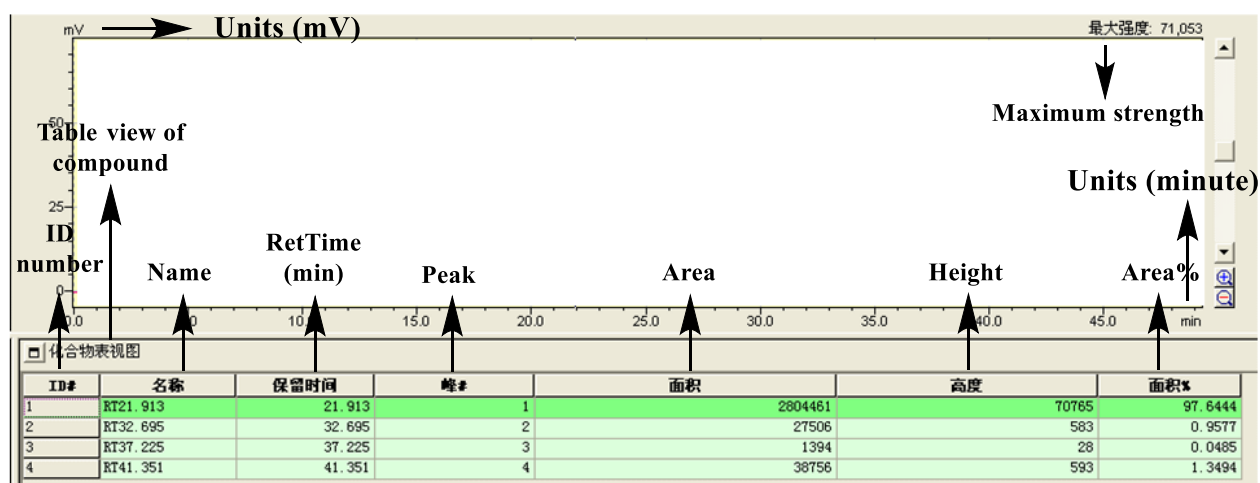

**(S,S)-7bl: (2S,4S)-2-cyclobutylchroman-4-ol** (HPLC: Chiracel AD-H, detected at 210 nm, eluent: n-hexane/2-propanol = 99/1, flow rate = 1.0mL/min, 25 °C).

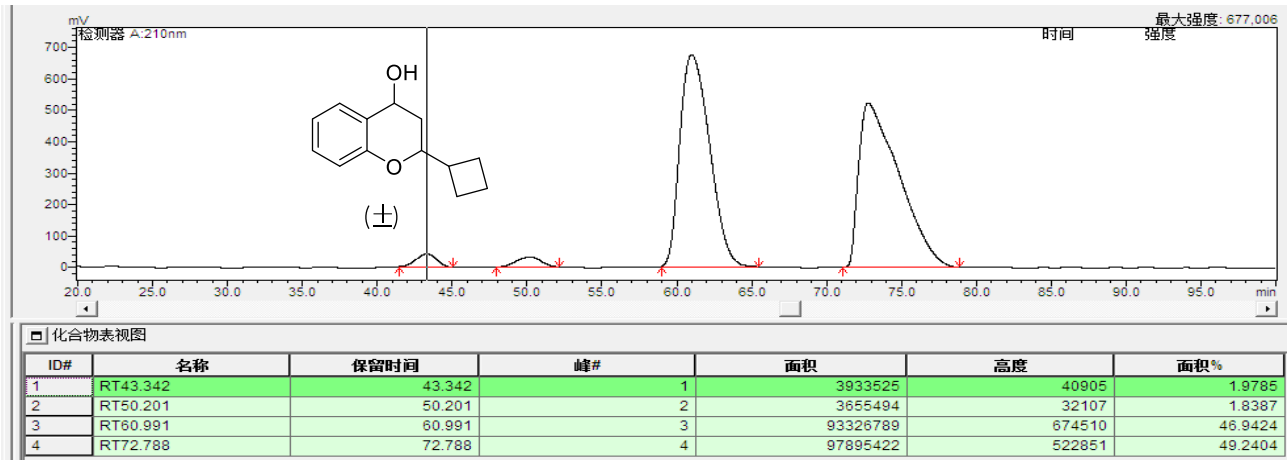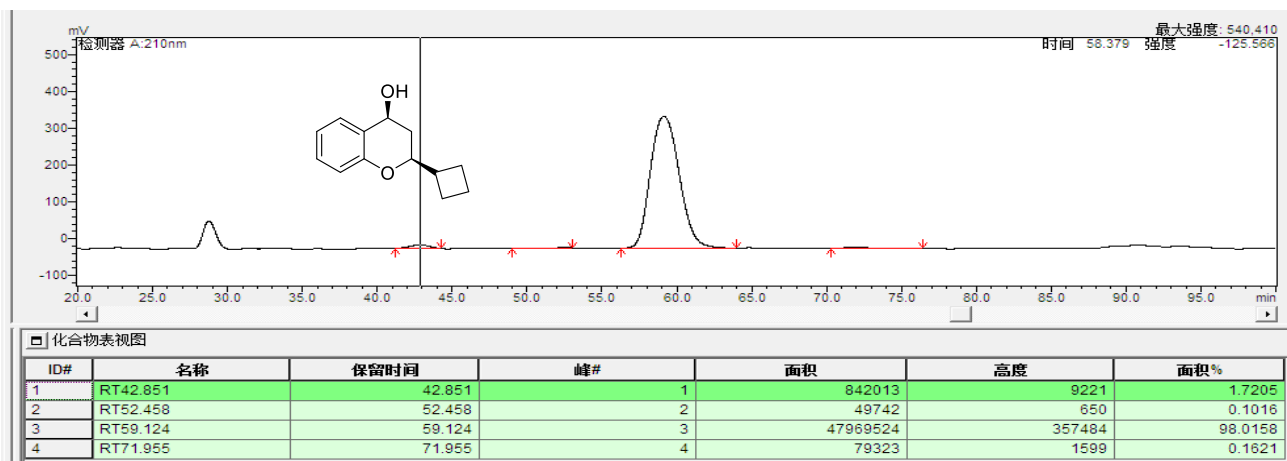

**Translation of all characters (Chinese) in the above two frameworks to English is as follows:**



(*S,S*)-7bm: (2*S*,4*S*)-2-cyclopentylchroman-4-ol (HPLC: Chiracel AD-H, detected at 210 nm, eluent: n-hexane/2-propanol = 97/3, flow rate = 1.0mL/min, 25 °C).

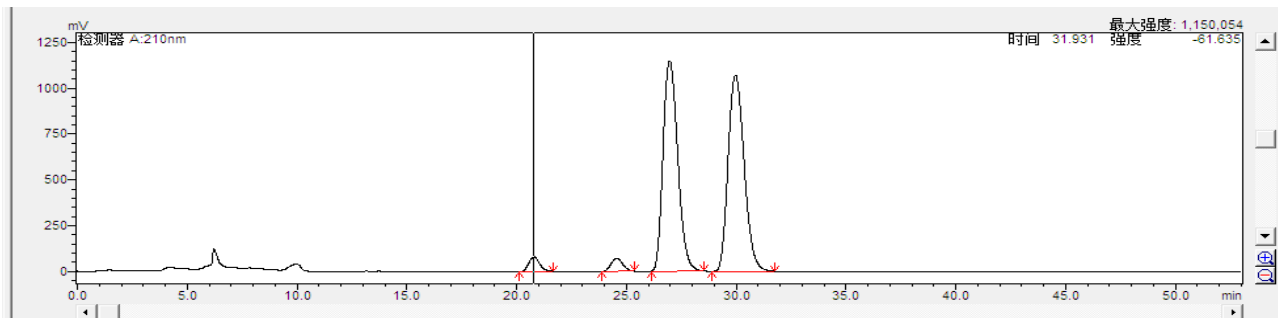

化合物表视图

| ID# | 名称       | 保留时间   | 峰# | 面积       | 高度      | 面积%     |
|-----|----------|--------|----|----------|---------|---------|
| 1   | RT20.780 | 20.780 | 1  | 2776674  | 82292   | 2.4493  |
| 2   | RT24.548 | 24.548 | 2  | 2633373  | 71353   | 2.3229  |
| 3   | RT26.965 | 26.965 | 3  | 53389214 | 1149148 | 47.0950 |
| 4   | RT29.960 | 29.960 | 4  | 54565680 | 1072049 | 48.1328 |

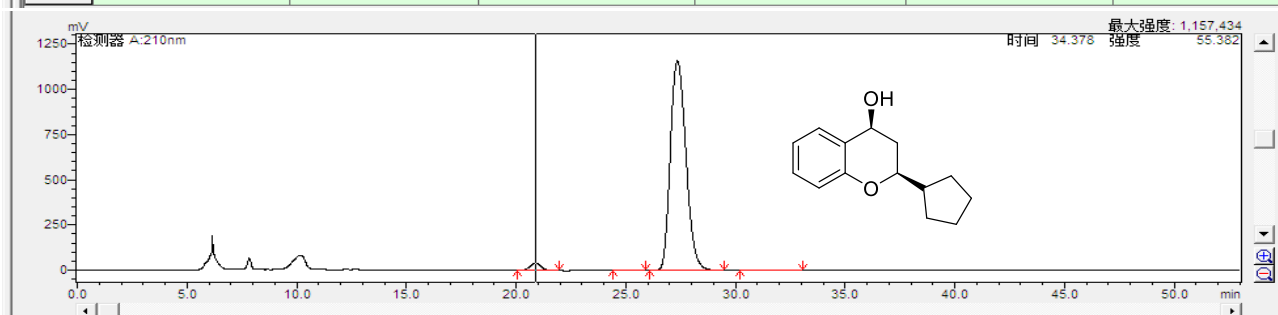

化合物表视图

| ID# | 名称       | 保留时间   | 峰# | 面积       | 高度      | 面积%     |
|-----|----------|--------|----|----------|---------|---------|
| 1   | RT20.864 | 20.864 | 1  | 1270840  | 38379   | 2.1646  |
| 2   | RT24.856 | 24.856 | 2  | 49028    | 982     | 0.0835  |
| 3   | RT27.348 | 27.348 | 3  | 57342524 | 1158838 | 97.6723 |
| 4   | RT31.045 | 31.045 | 4  | 46729    | 1888    | 0.0796  |

**Translation of all characters (Chinese) in the above two frameworks to English is as follows:**

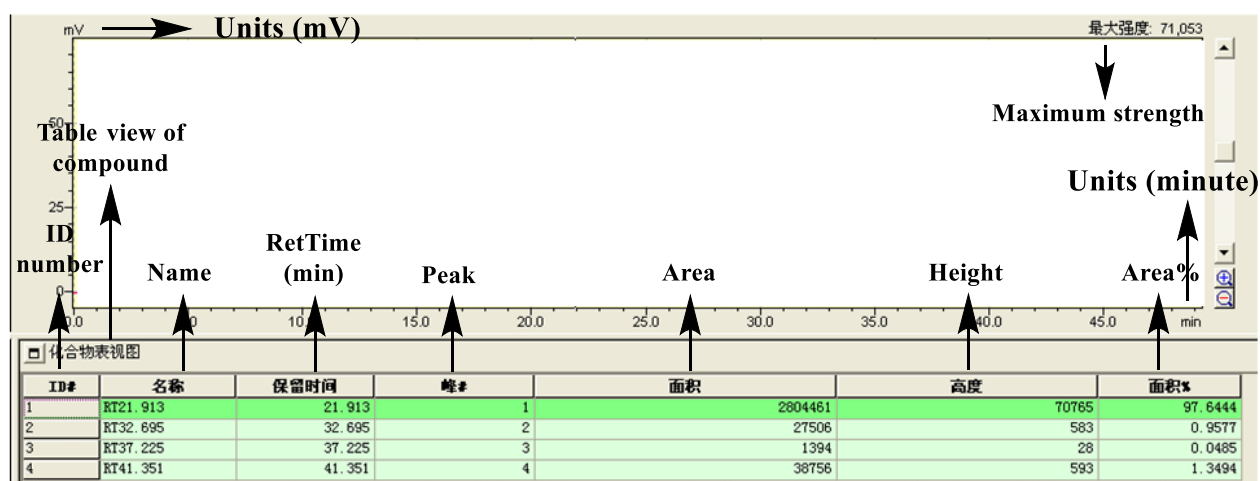

**(S,S)-7bn: (2S,4S)-2-cyclohexylchroman-4-ol** (HPLC: Chiracel AD-H, detected at 210 nm, eluent: n-hexane/2-propanol = 97/3, flow rate = 1.0mL/min, 25 °C).

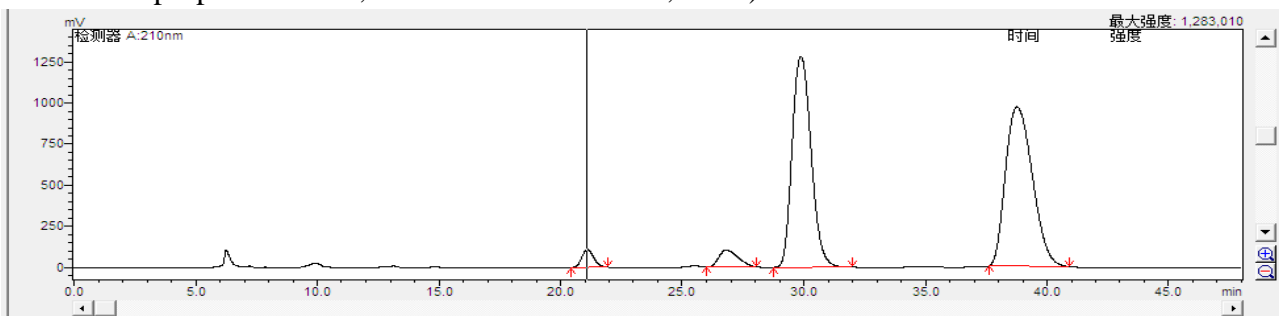

化合物表视图

| ID# | 名称       | 保留时间   | 峰# | 面积       | 高度      | 面积%     |
|-----|----------|--------|----|----------|---------|---------|
| 1   | RT21.108 | 21.108 | 1  | 3735447  | 109747  | 2.4361  |
| 2   | RT26.820 | 26.820 | 2  | 5536572  | 103782  | 3.6108  |
| 3   | RT29.881 | 29.881 | 3  | 69721256 | 1280913 | 45.4699 |
| 4   | RT38.770 | 38.770 | 4  | 74341824 | 968159  | 48.4832 |

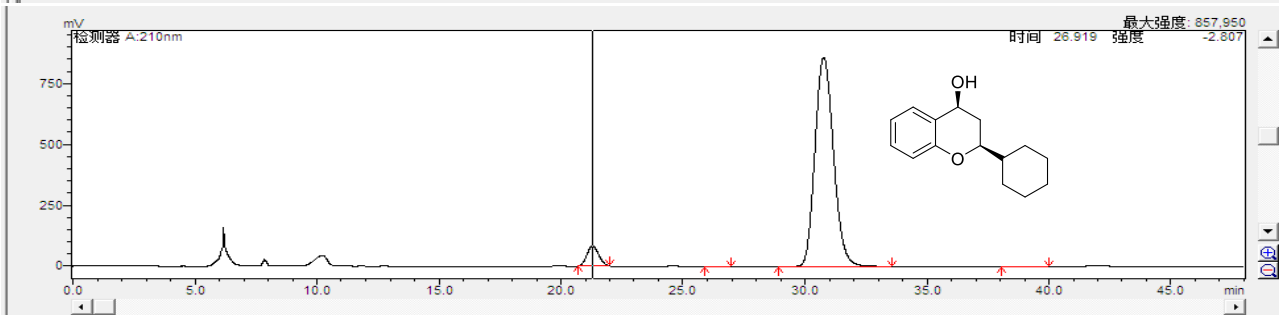

化合物表视图

| ID# | 名称       | 保留时间   | 峰# | 面积       | 高度     | 面积%     |
|-----|----------|--------|----|----------|--------|---------|
| 1   | RT21.295 | 21.295 | 1  | 2789332  | 82482  | 5.7858  |
| 2   | RT26.502 | 26.502 | 2  | 9385     | 316    | 0.0195  |
| 3   | RT30.770 | 30.770 | 3  | 45405177 | 860040 | 94.1817 |
| 4   | RT38.863 | 38.863 | 4  | 6298     | 376    | 0.0131  |

**Translation of all characters (Chinese) in the above two frameworks to English is as follows:**

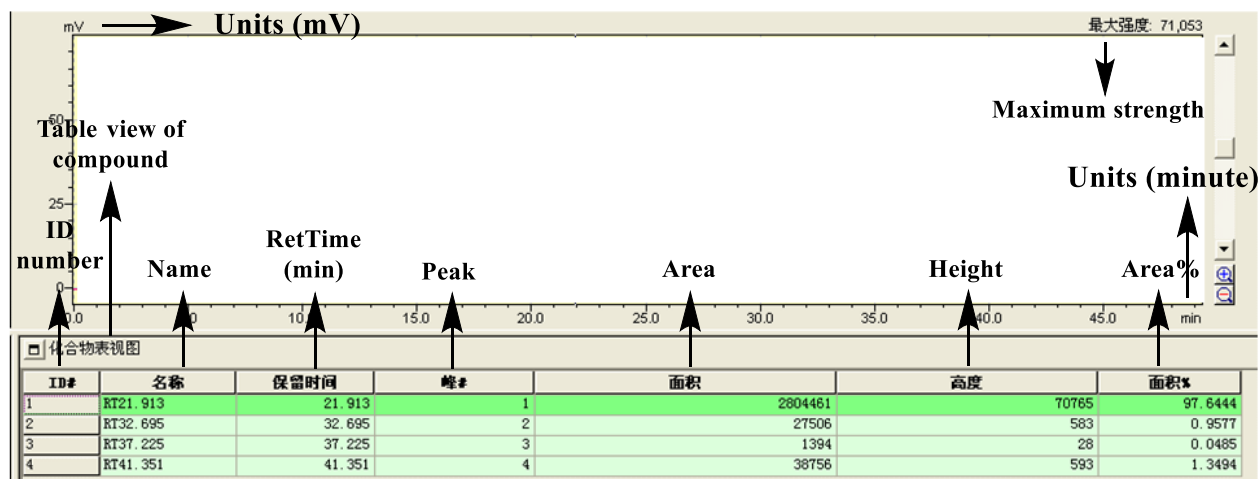

**(S,S)-7bo:** tert-butyl 4-((2S,4S)-7-bromo-4-hydroxychroman-2-yl)piperidine-1-carboxylate  
 (HPLC: Chiracel AD-H, detected at 210 nm, eluent: n-hexane/2-propanol = 97/3, flow rate = 1.0mL/min, 25 °C).

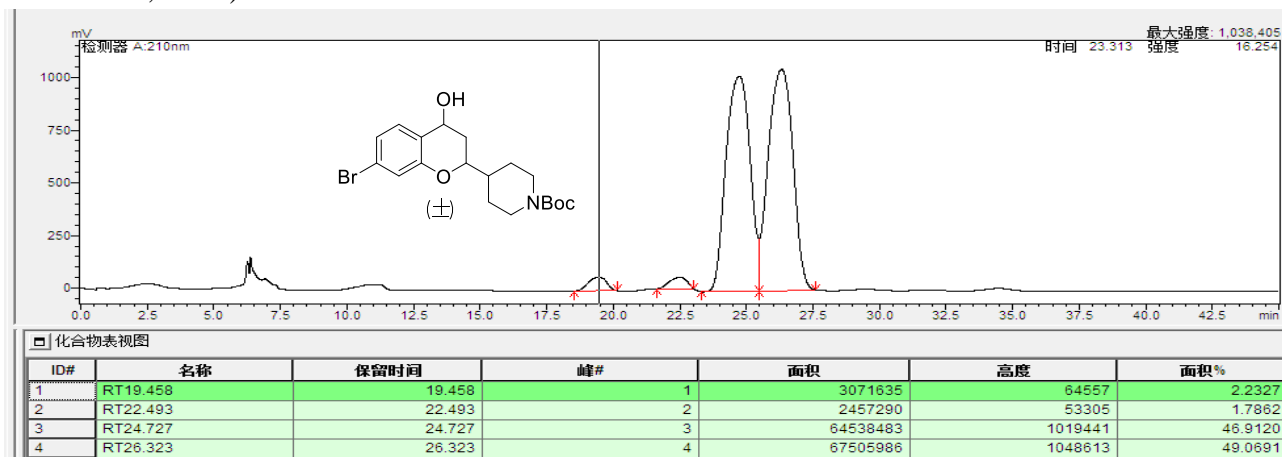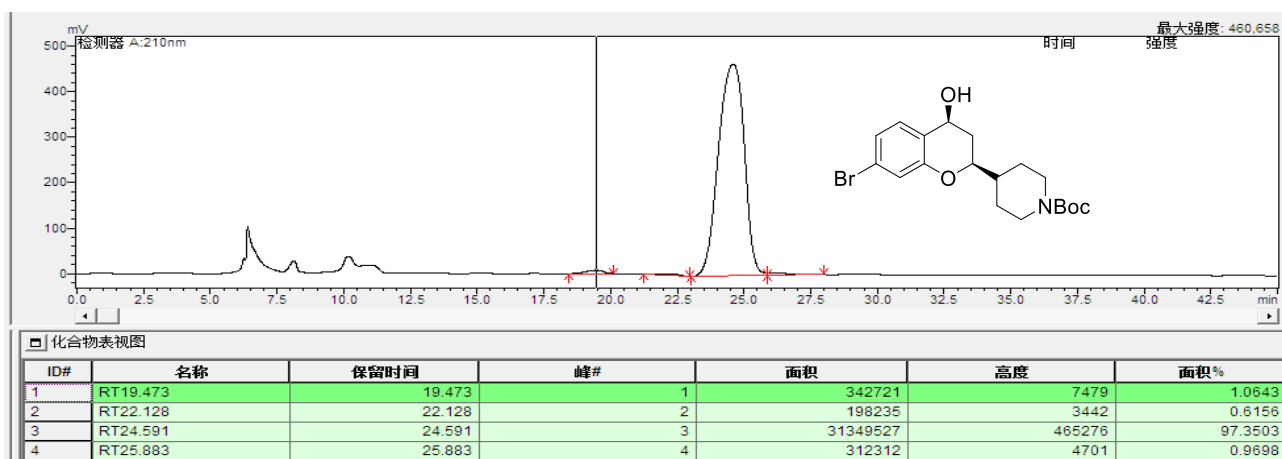

**Translation of all characters (Chinese) in the above two frameworks to English is as follows:**



Figure S7. Characterizations of chiral products (<sup>1</sup>H NMR, <sup>13</sup>C NMR, and LC/MS spectra).

**(*S,S*)-7aa: (2*S*,4*S*)-2-(4-bromophenyl)chroman-4-ol.**

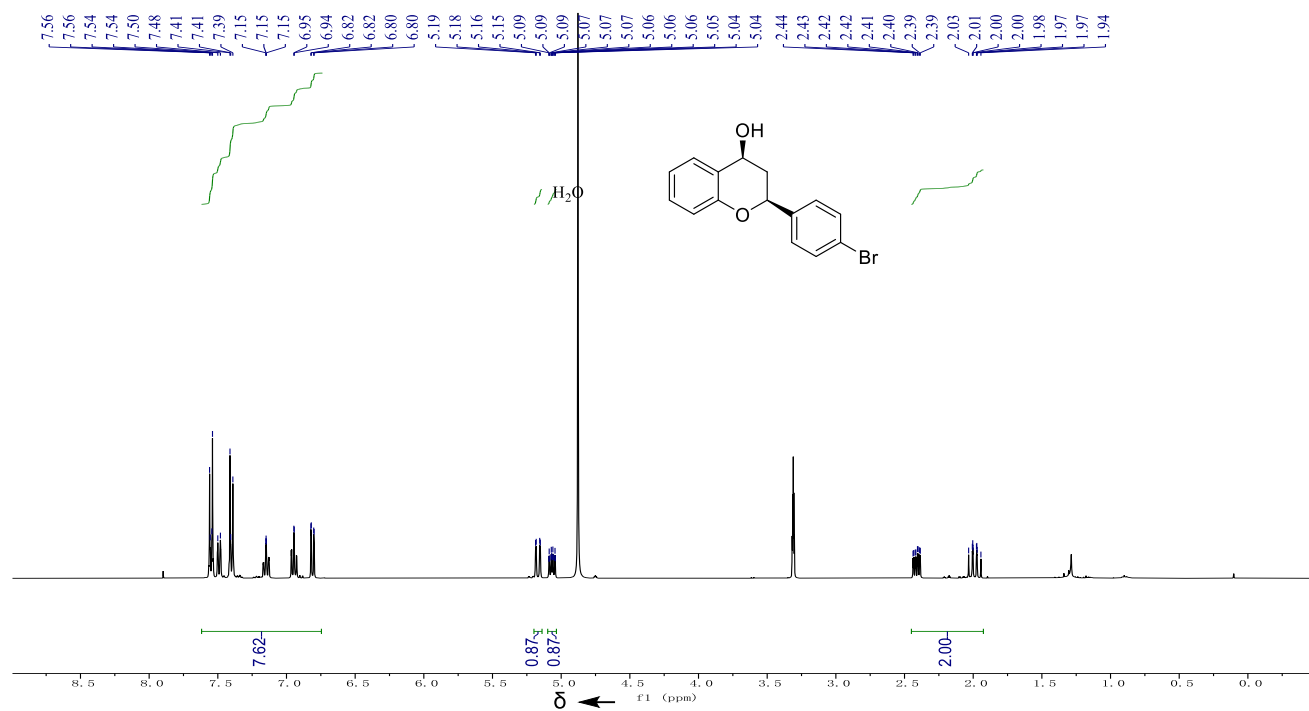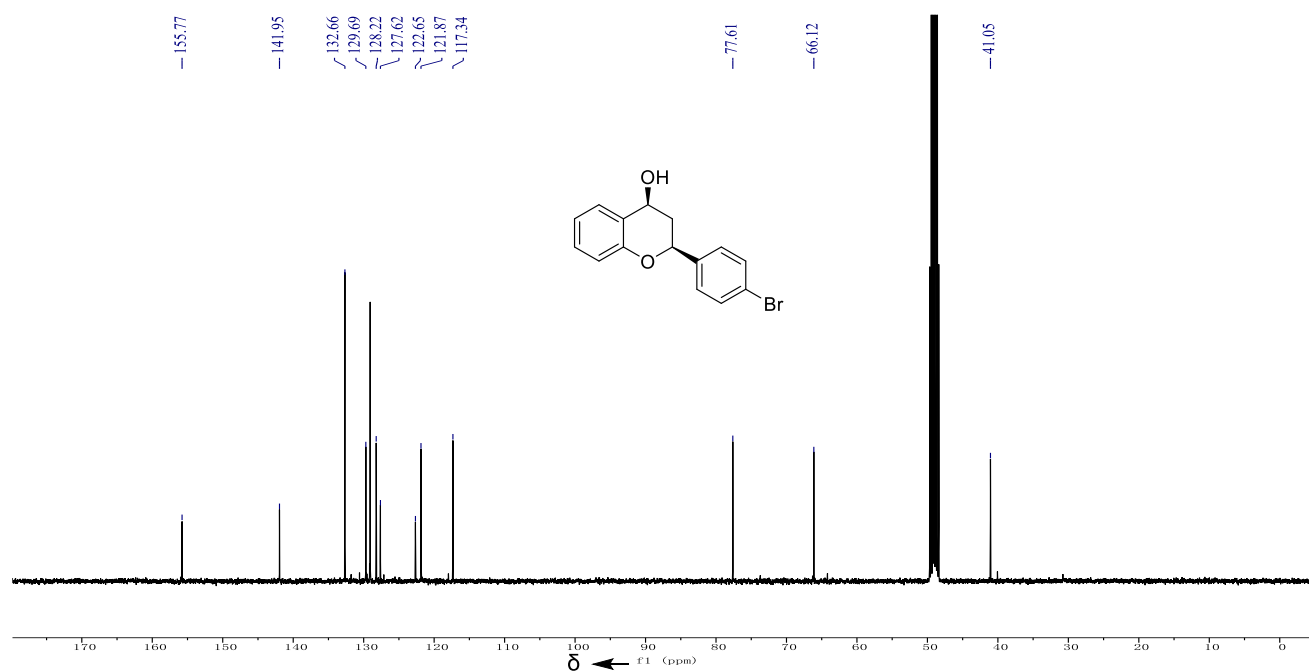

**(S,S)-7ab: (2S,4S)-2-(4-fluorophenyl)chroman-4-ol.**

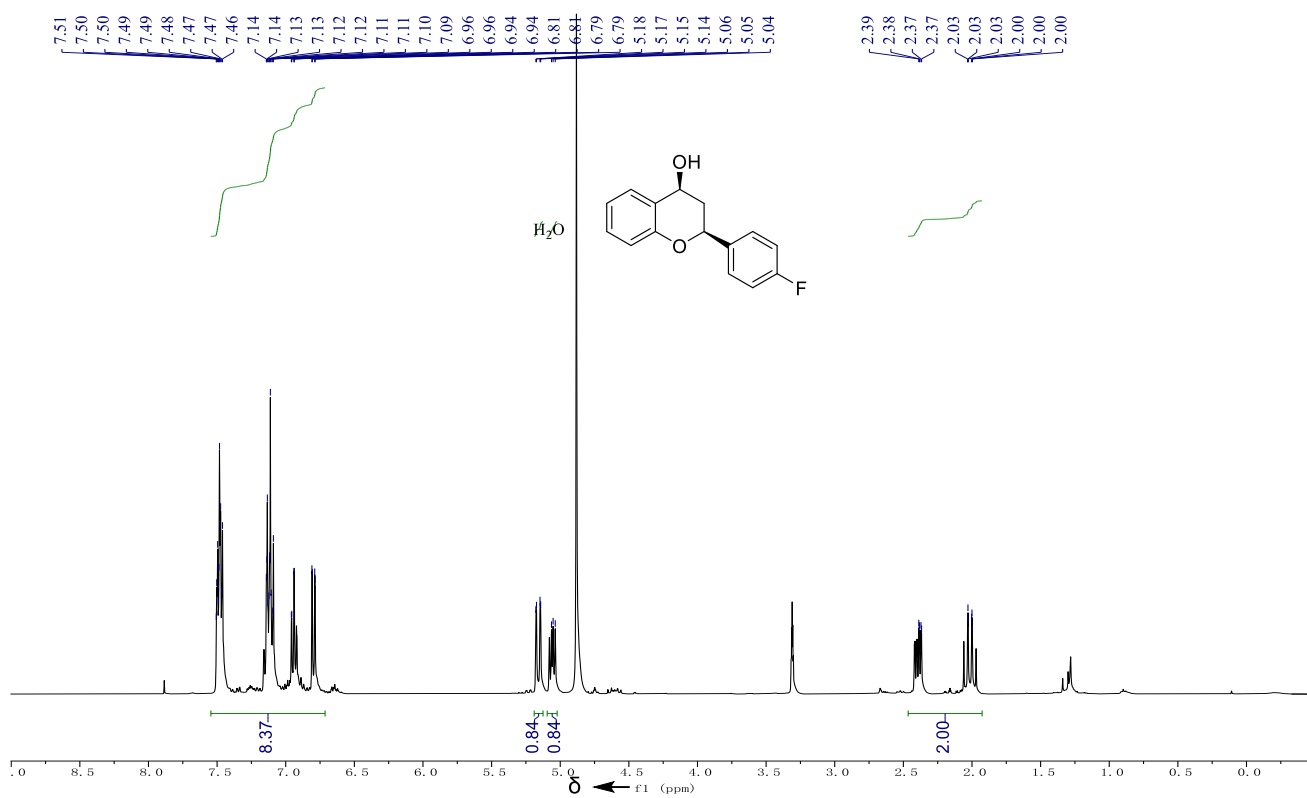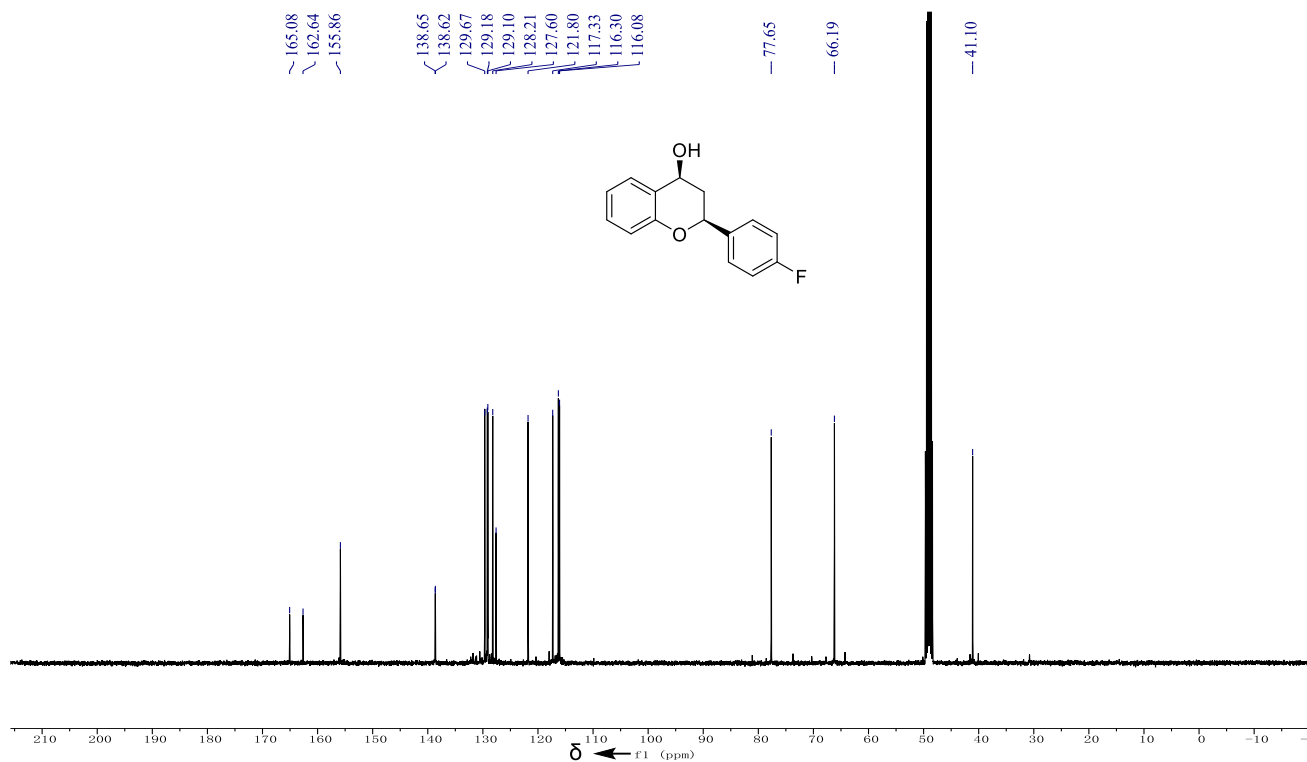

**(S,S)-7ac: (2S,4S)-2-(4-chlorophenyl)chroman-4-ol.**

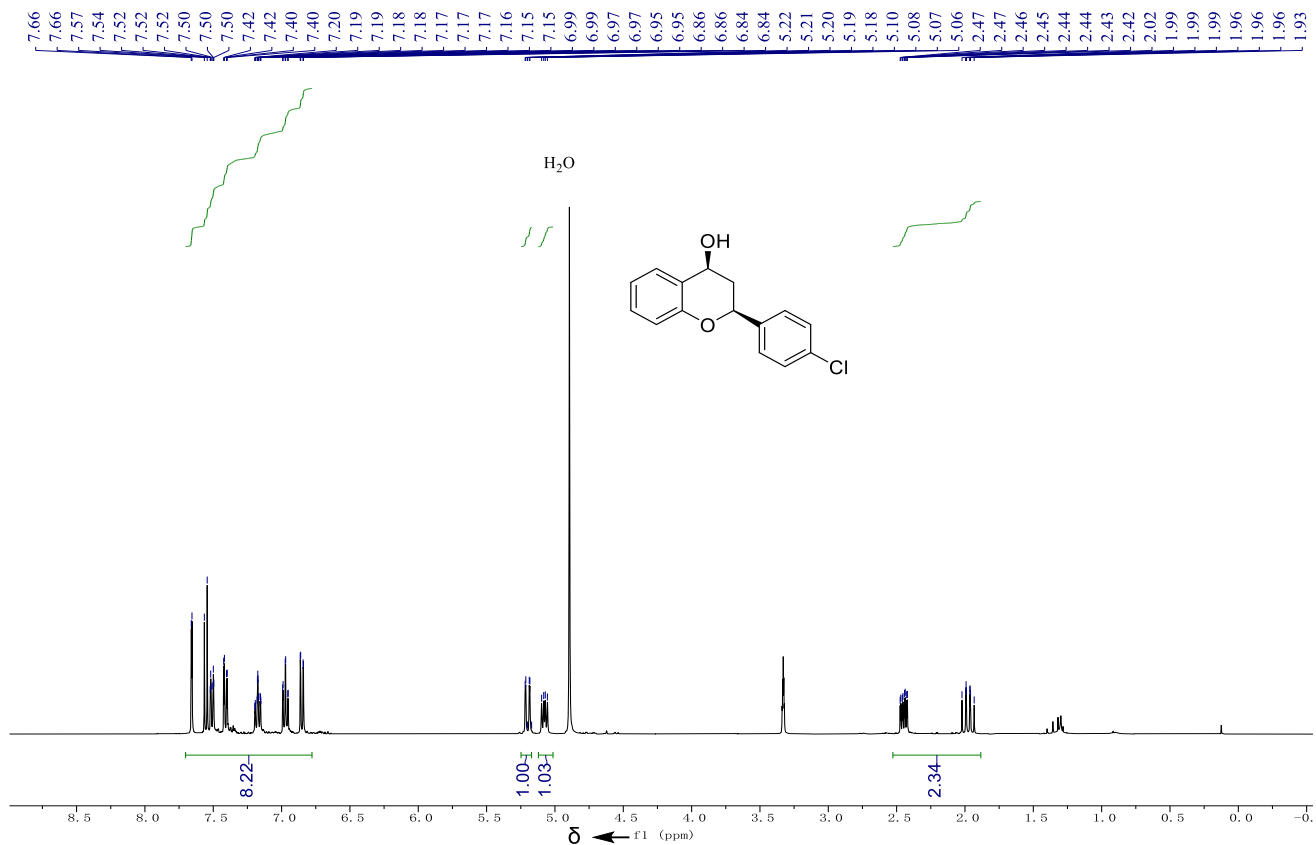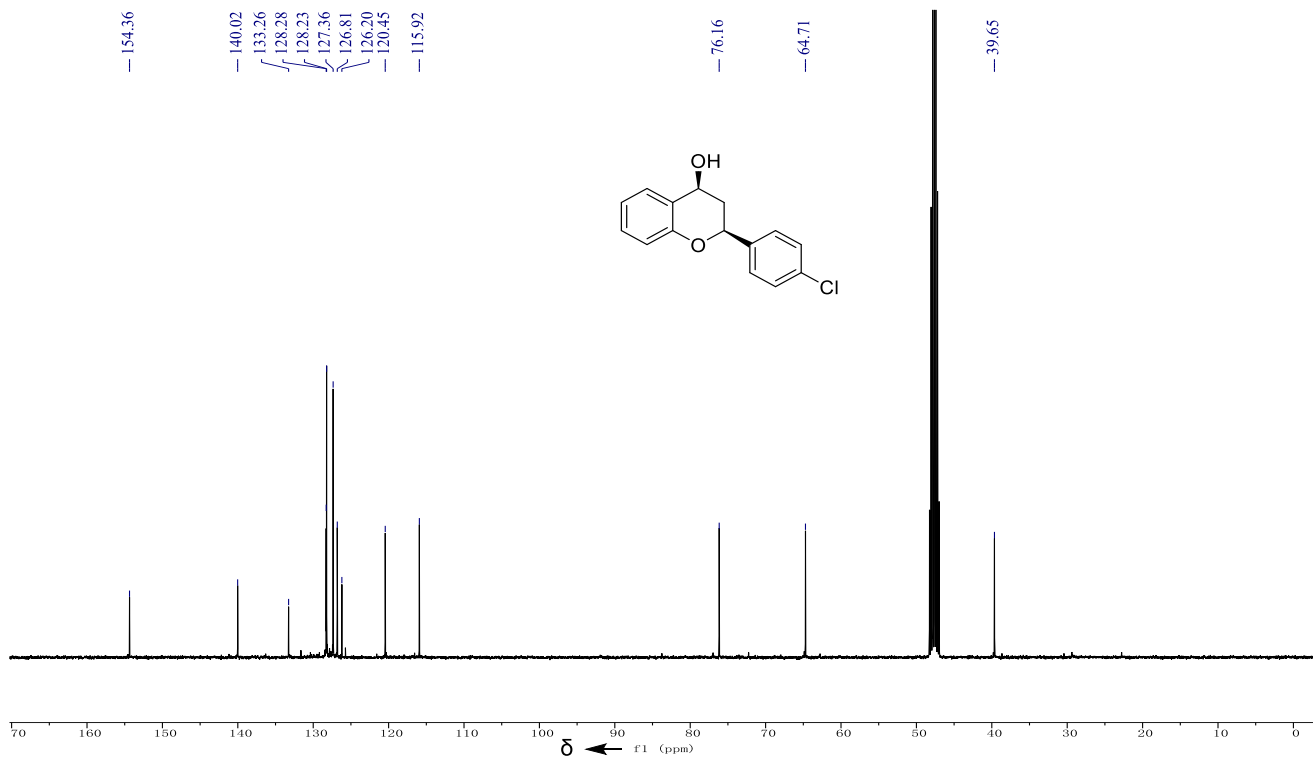



**(S,S)-7ad: (2S,4S)-2-(3-chlorophenyl)chroman-4-ol.**

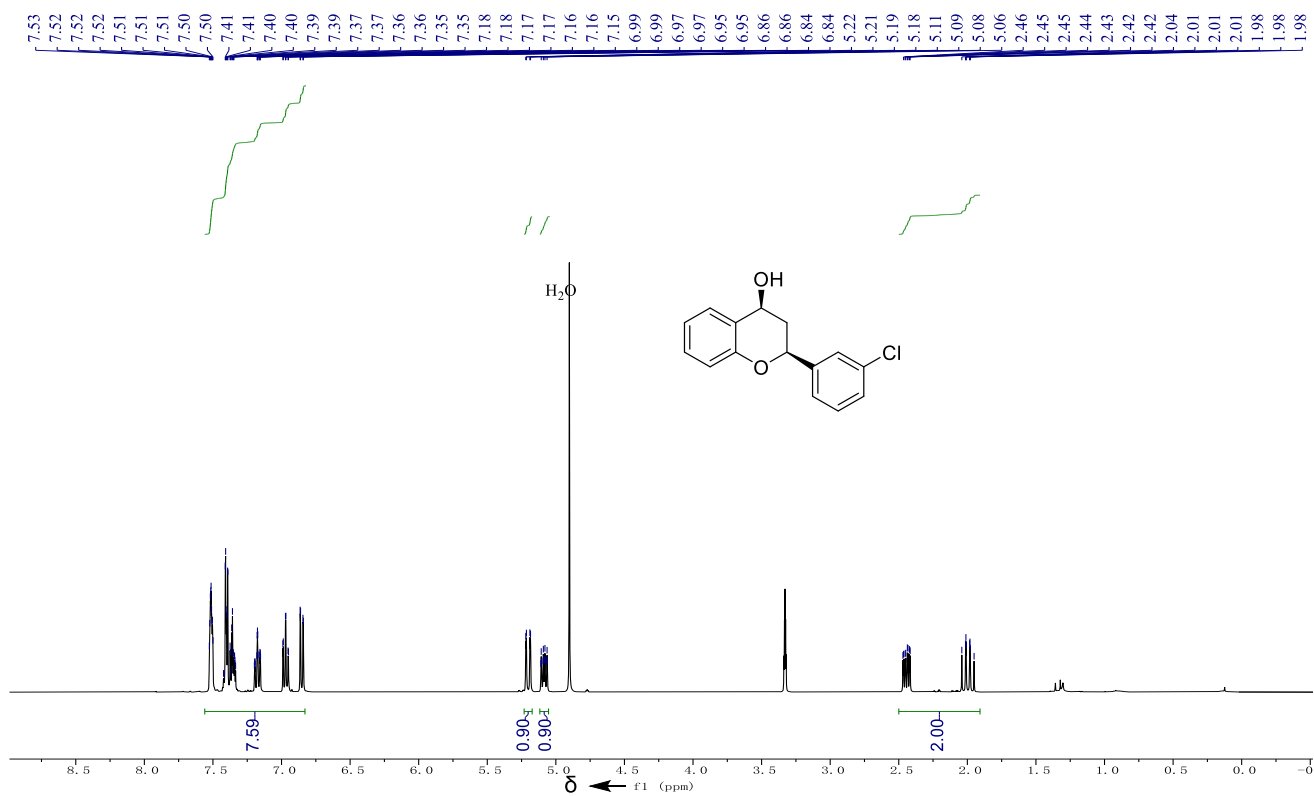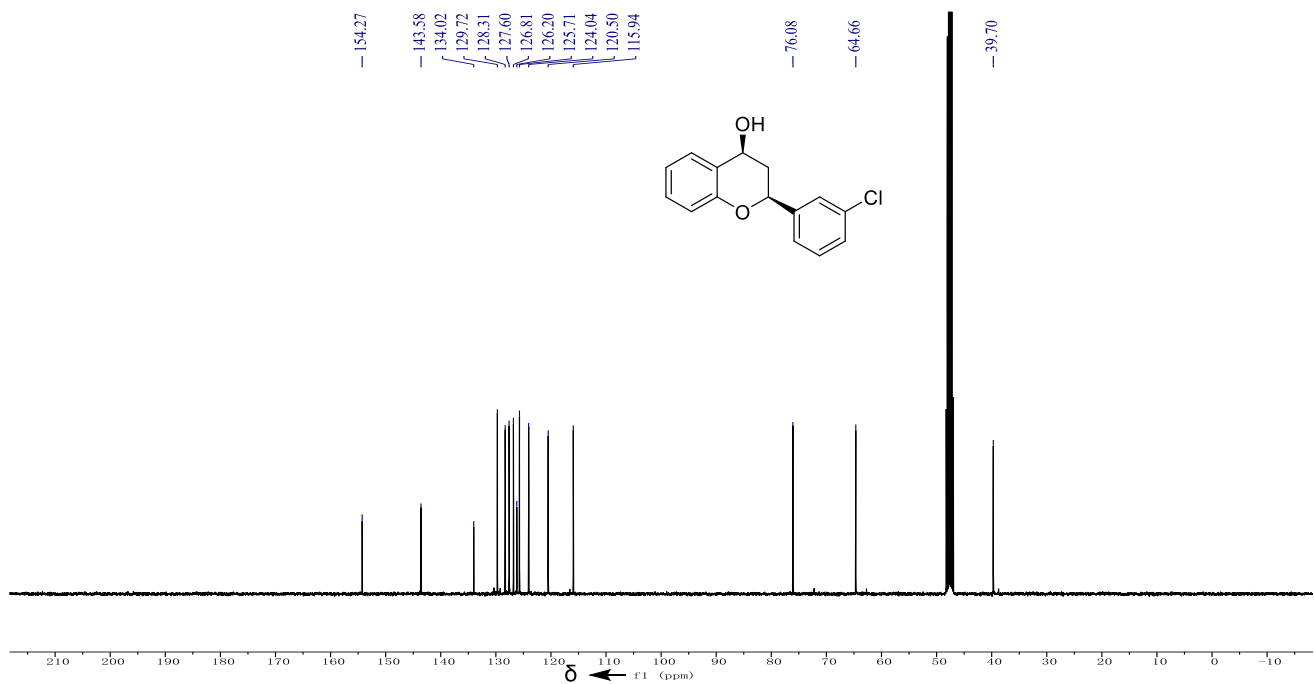

**(S,S)-7ae:(2S,4S)-2-(3,4-dichlorophenyl)chroman-4-ol.**

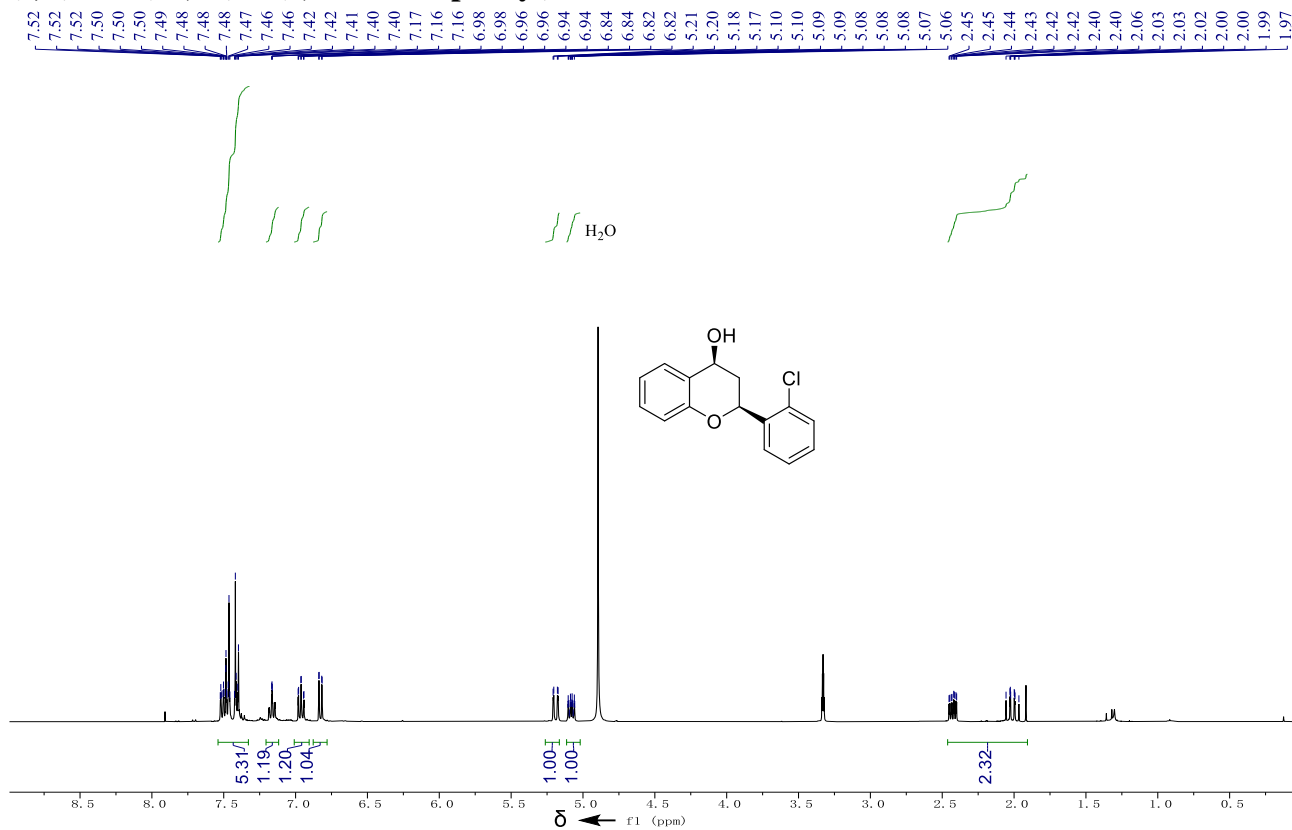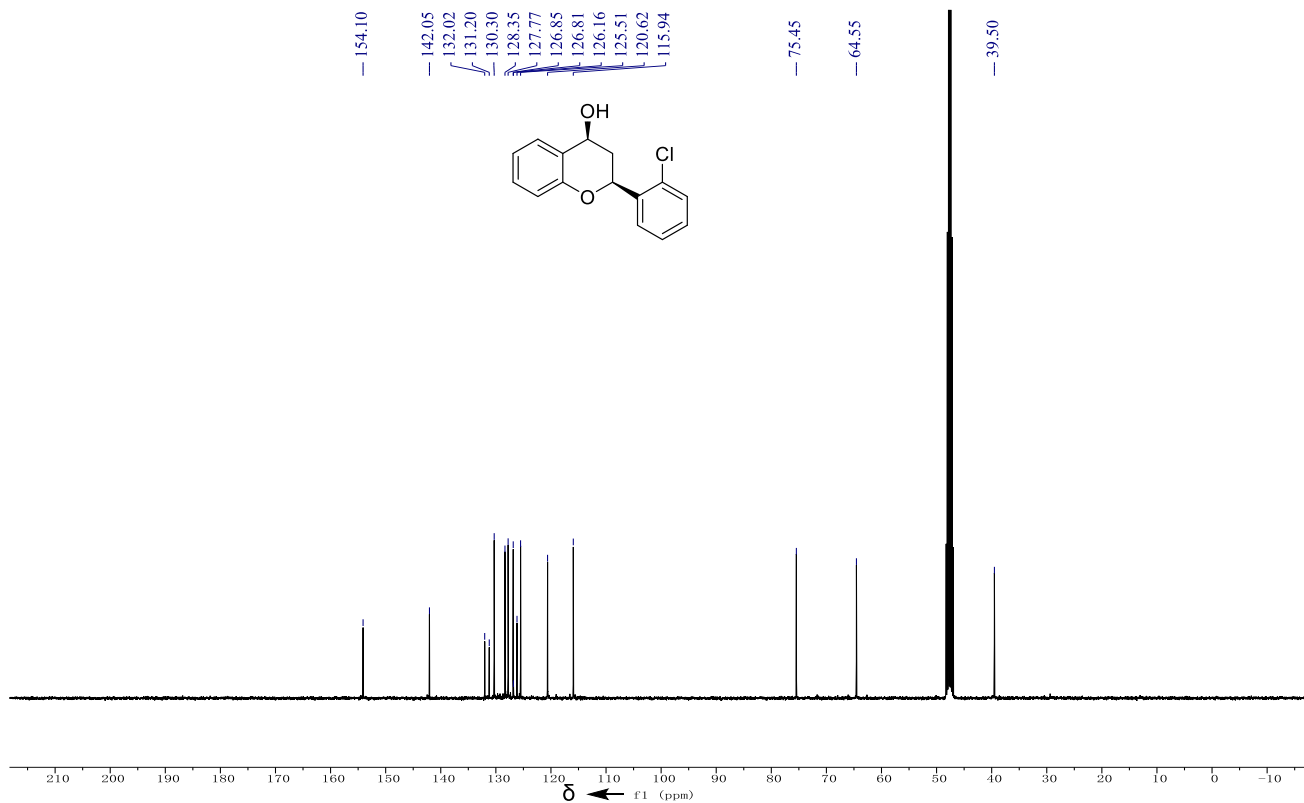

**(S,S)-7af: (2S,4S)-2-phenylchroman-4-ol.**

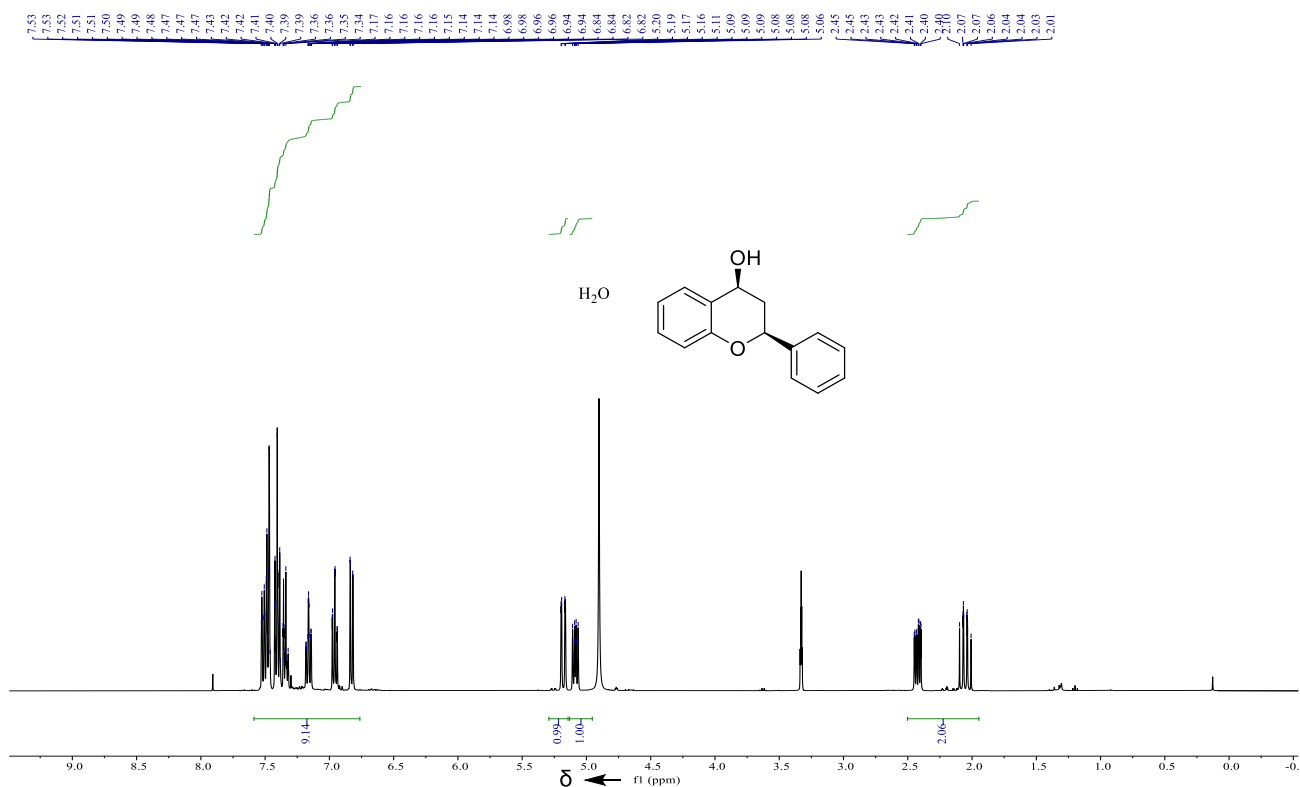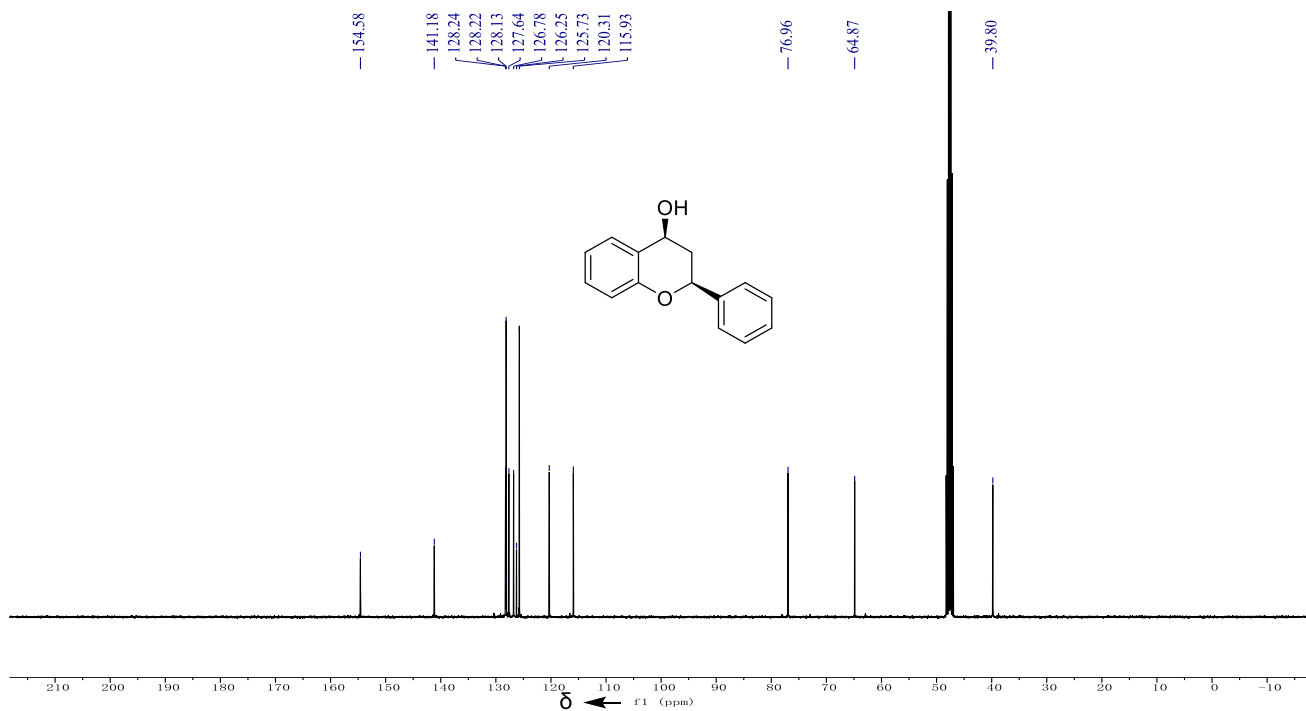

**(S,S)-7ag: (2S,4S)-2-(p-tolyl)chroman-4-ol.**

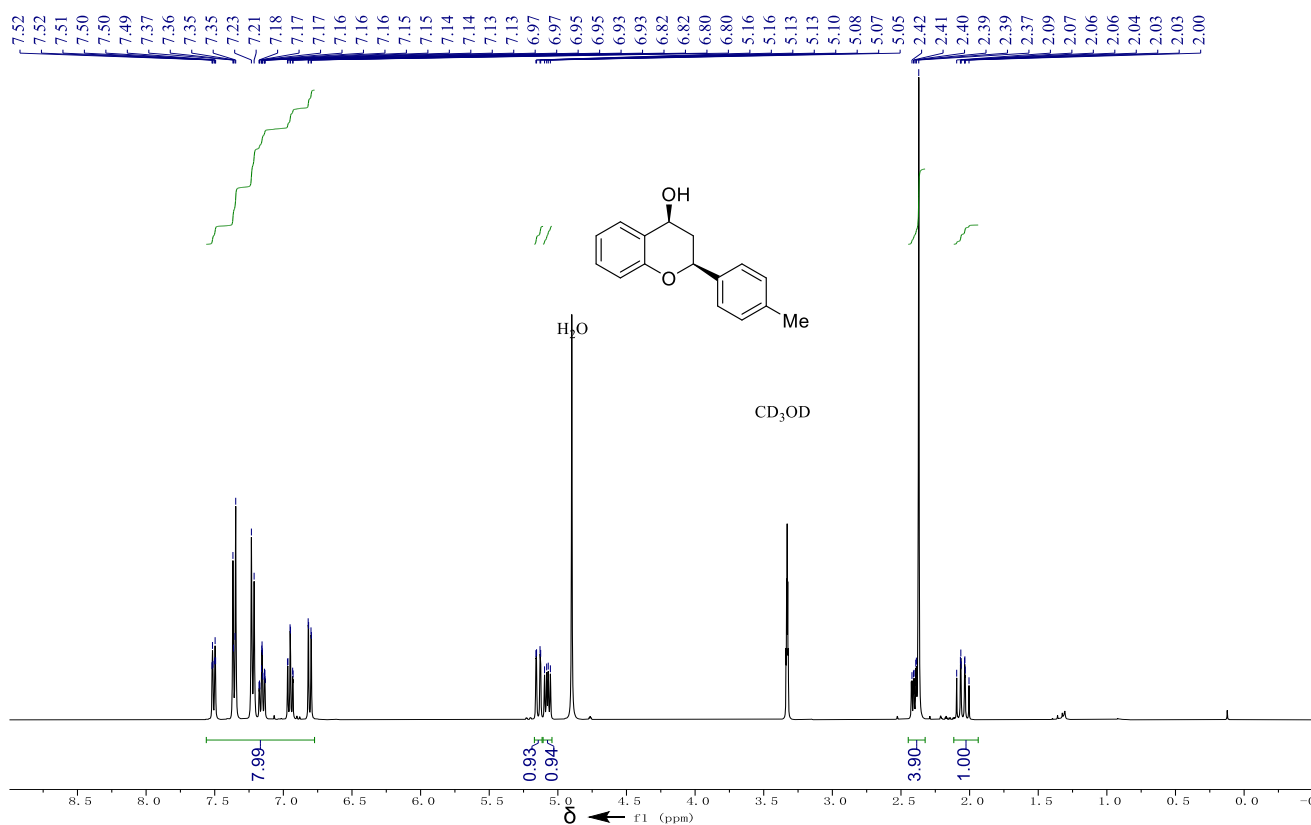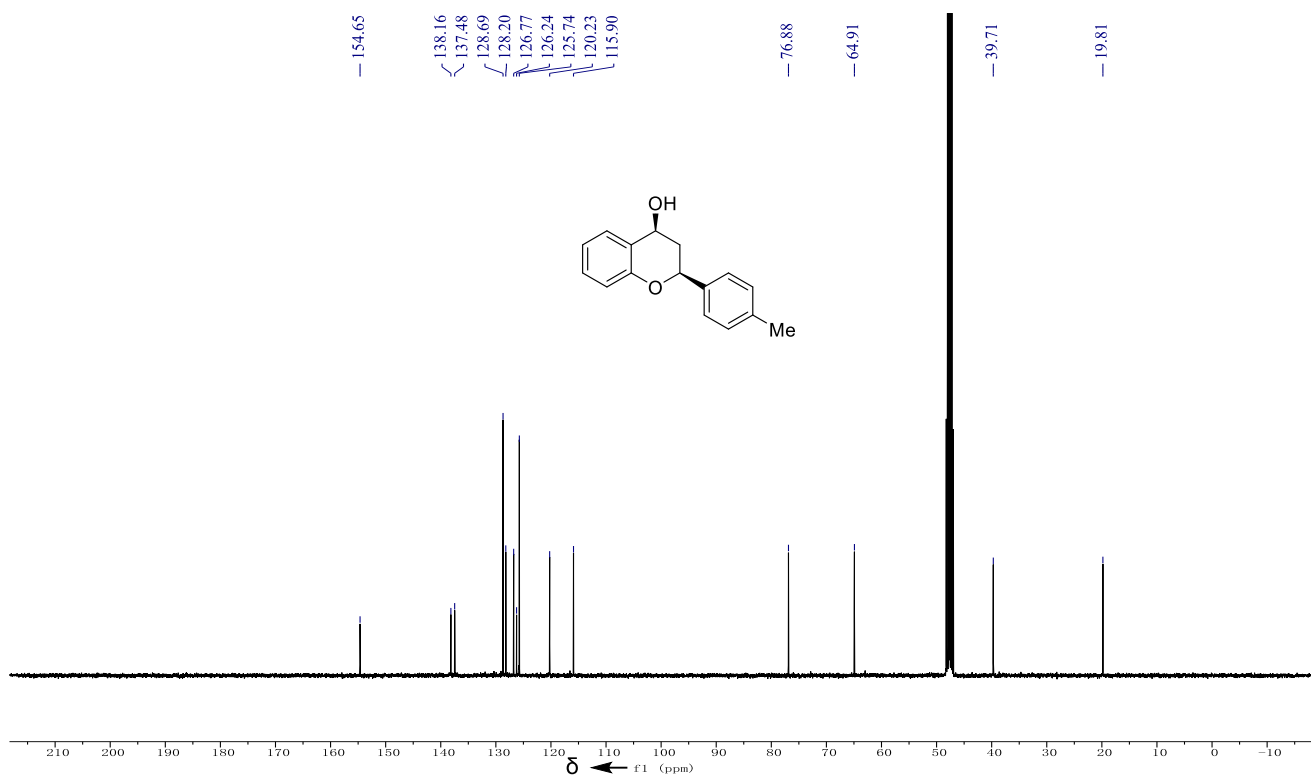

**(S,S)-7ah: (2S,4S)-2-(m-tolyl)chroman-4-ol.**

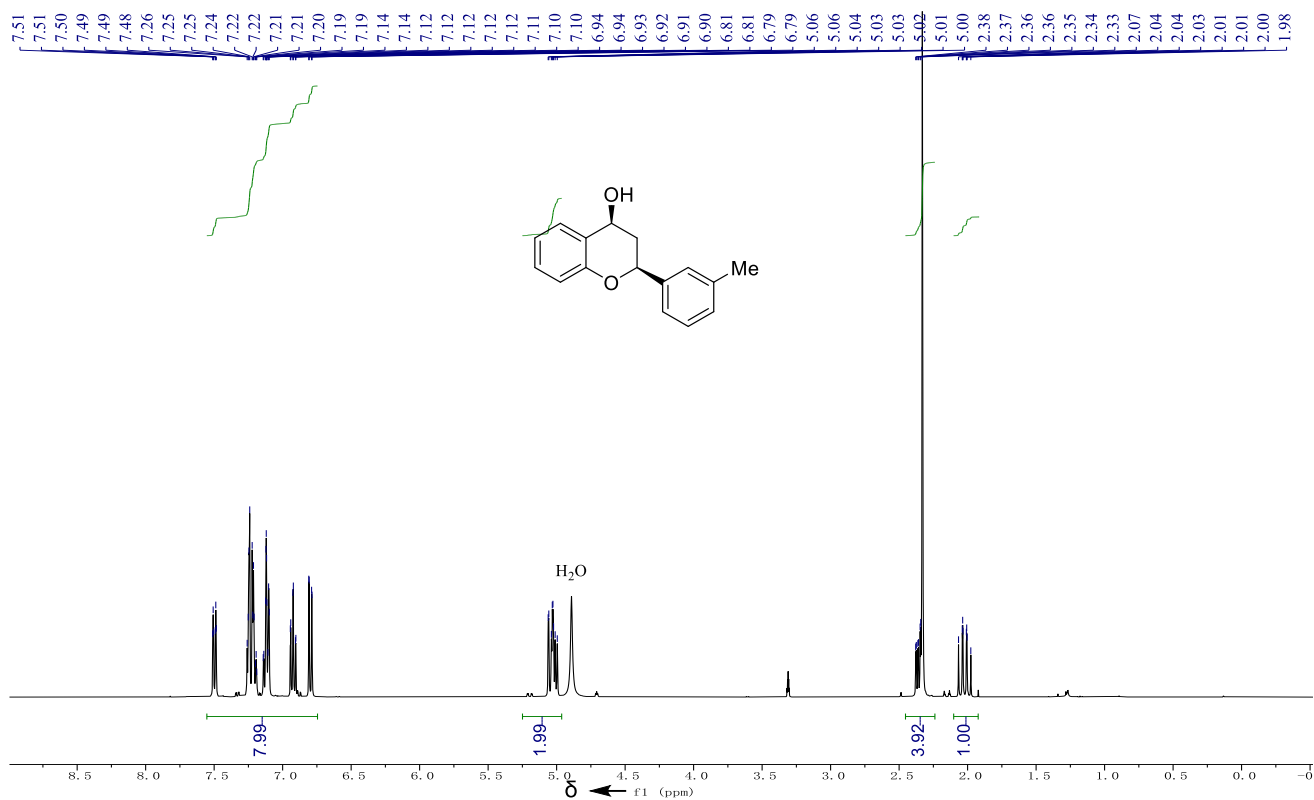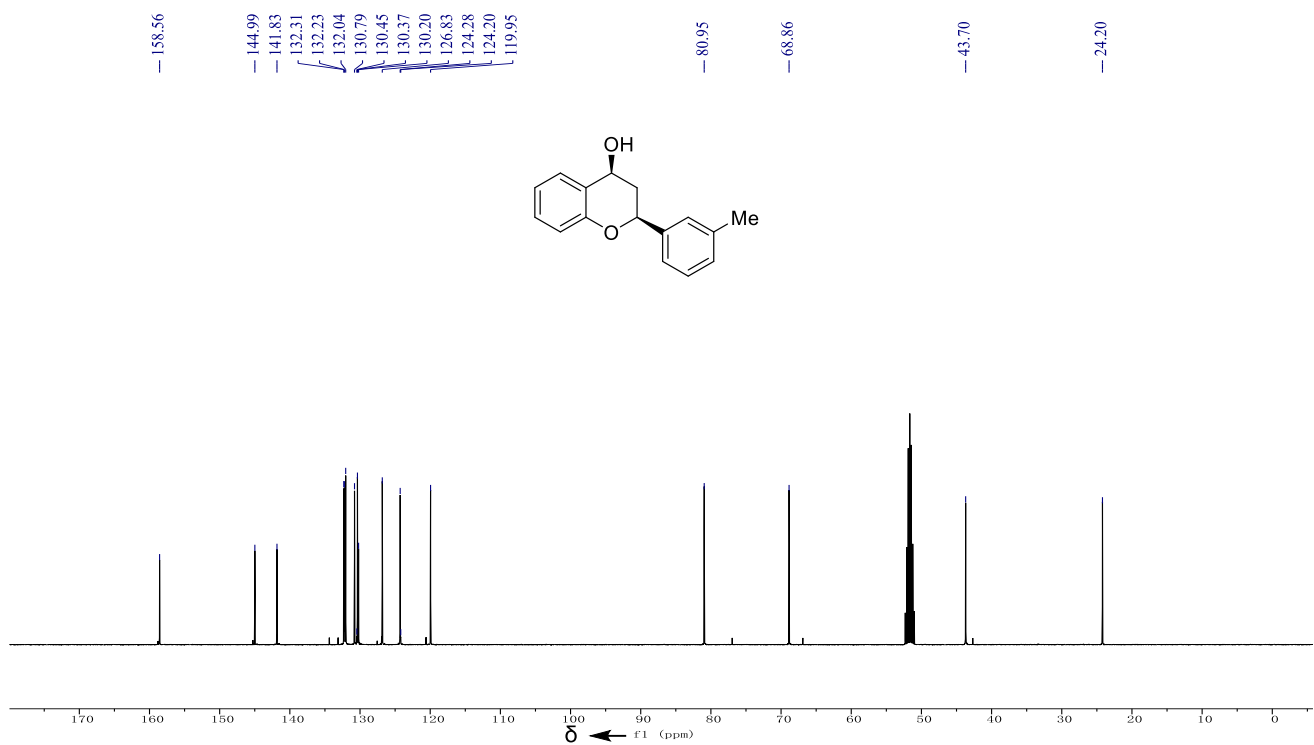

**(S,S)-7ai: (2S,4S)-2-(o-tolyl)chroman-4-ol.**

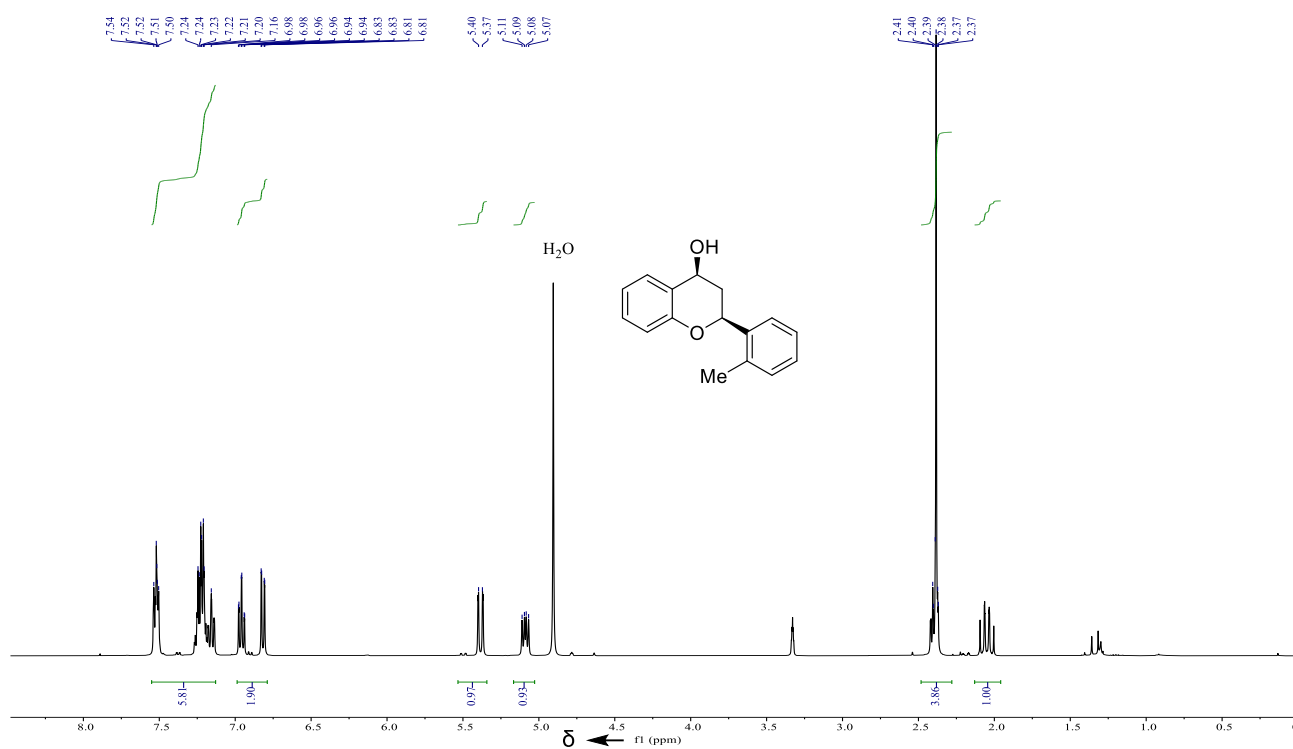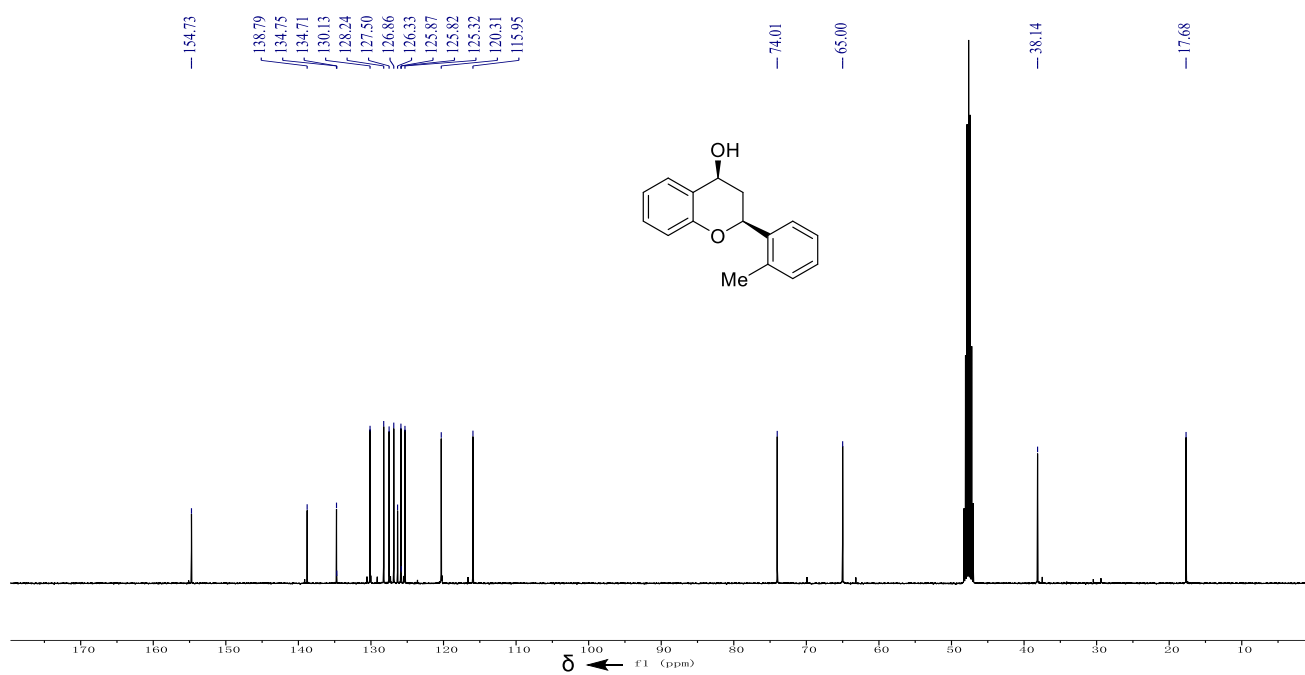

**(S,S)-7aj: (2S,4S)-2-(4-methoxyphenyl)chroman-4-ol.**

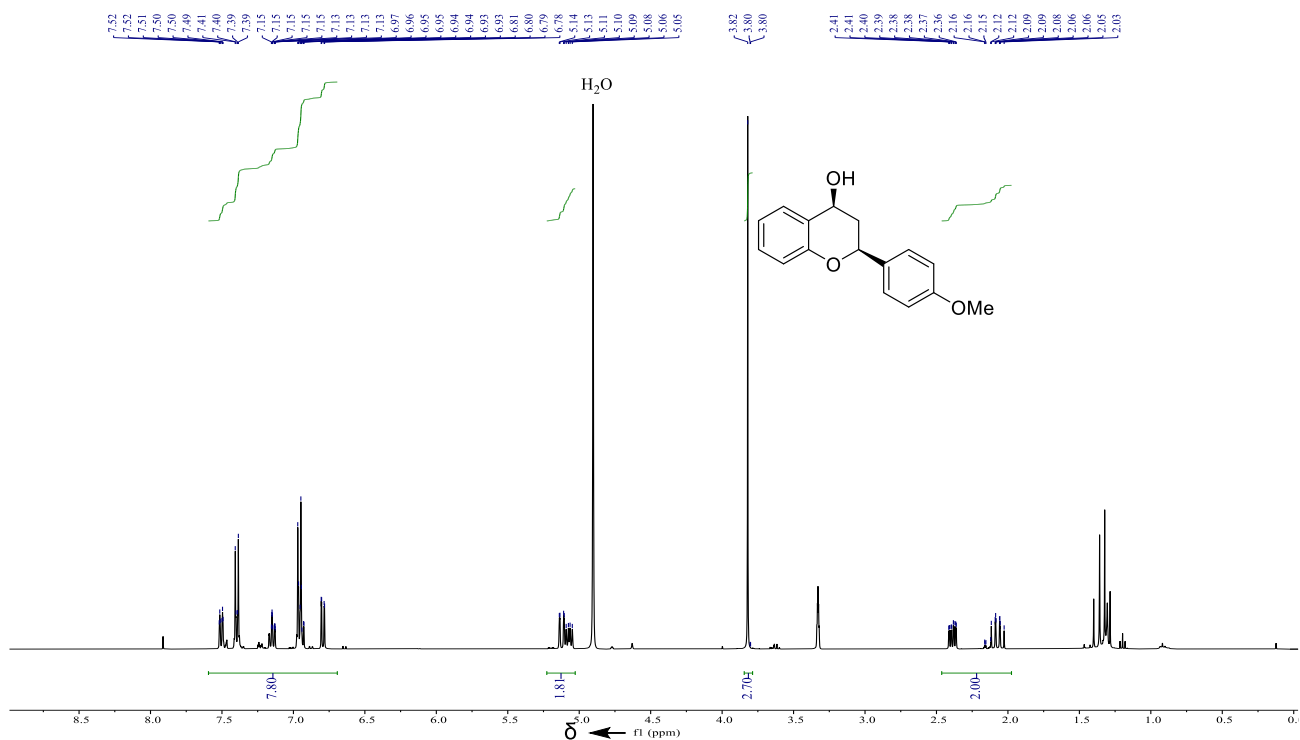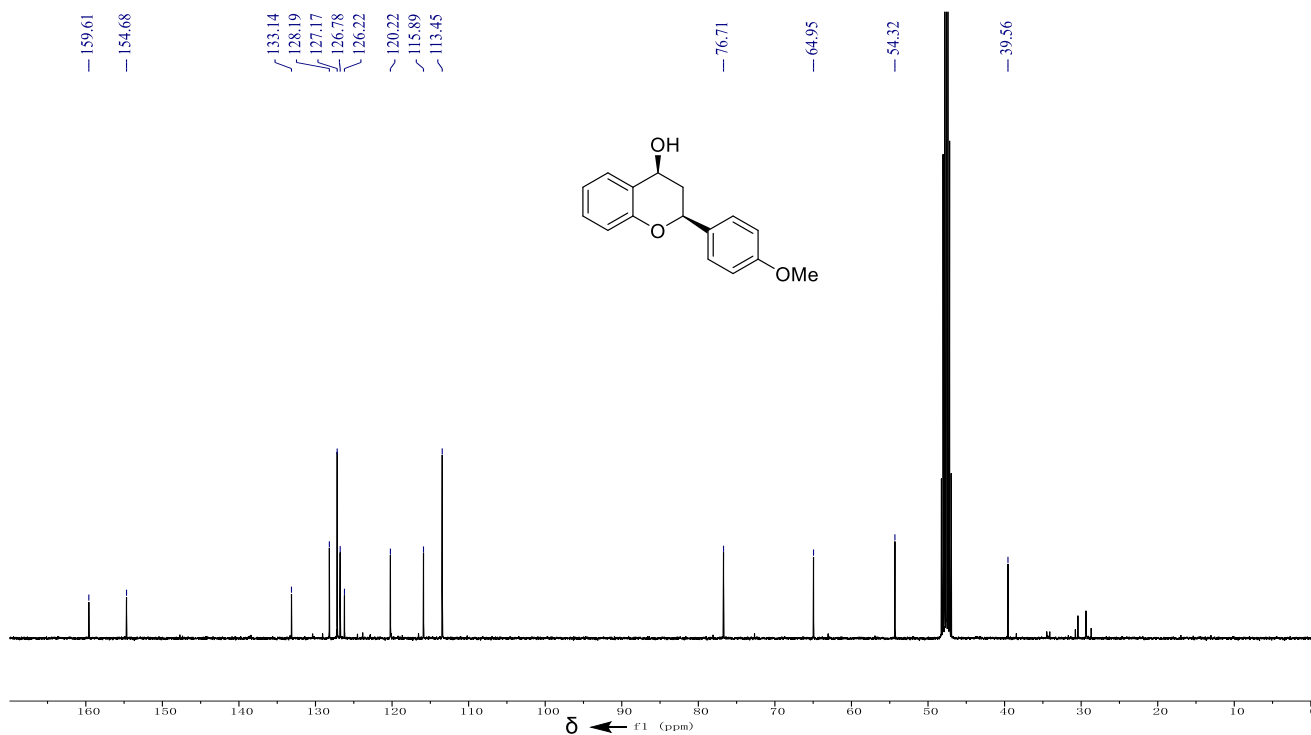

**(S,S)-7ak: (2S,4S)-2-(3-methoxyphenyl)chroman-4-ol.**

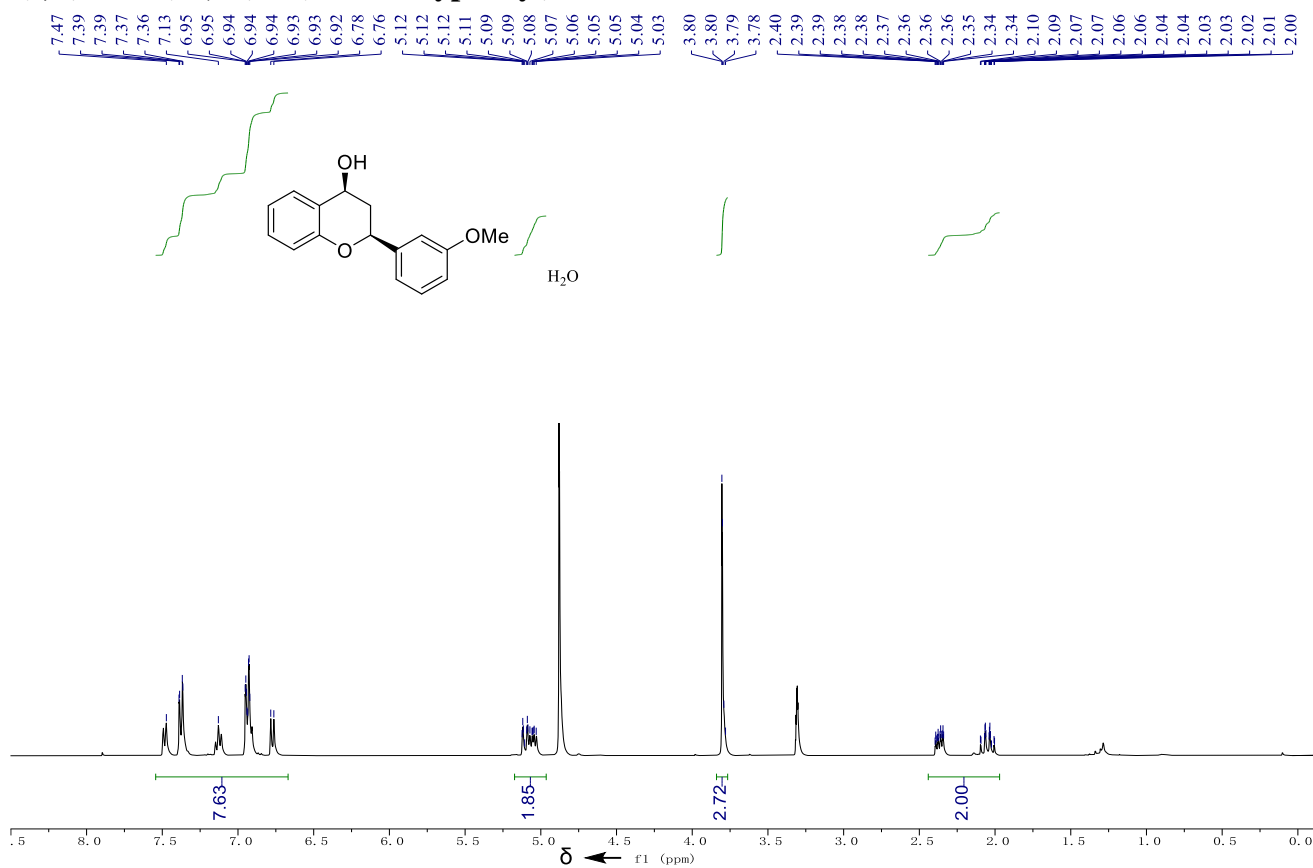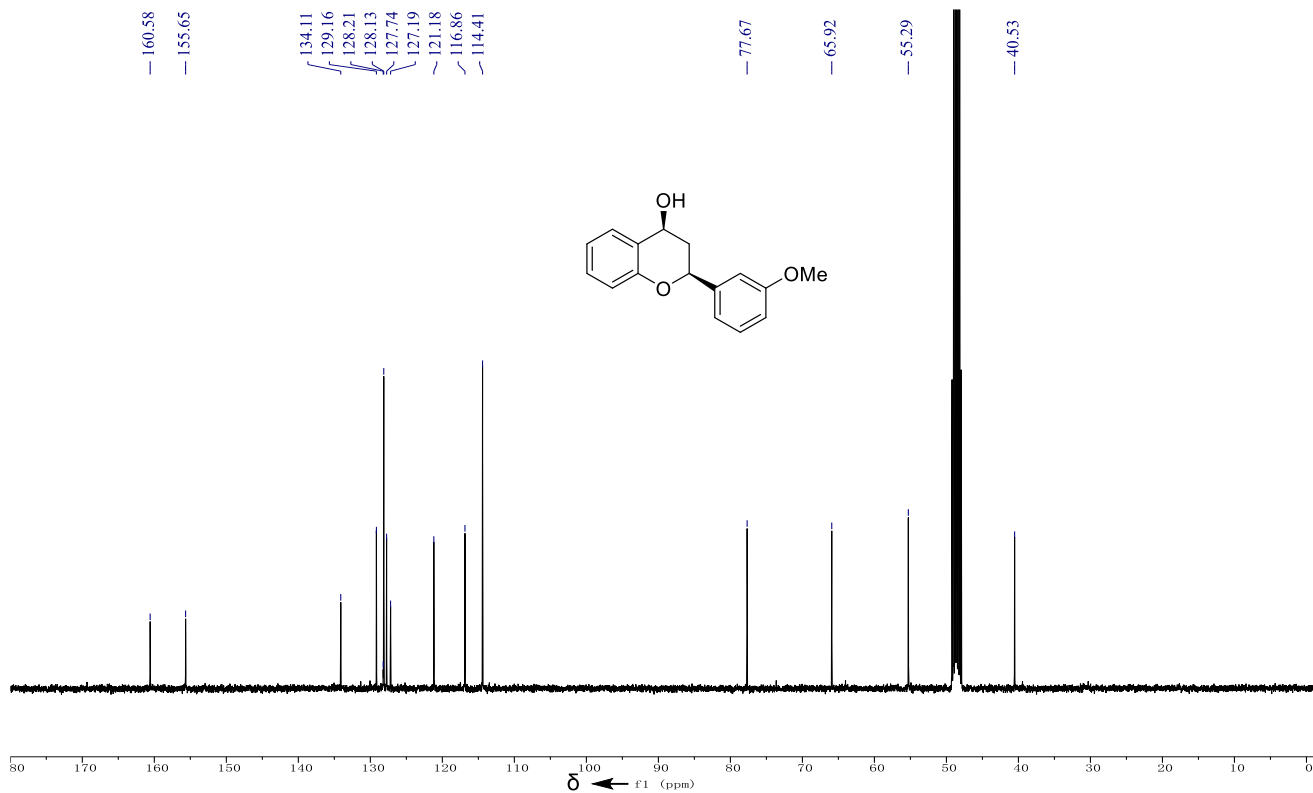



**(S,S)-7aI: (2S,4S)-2-(2-methoxyphenyl)chroman-4-ol.**

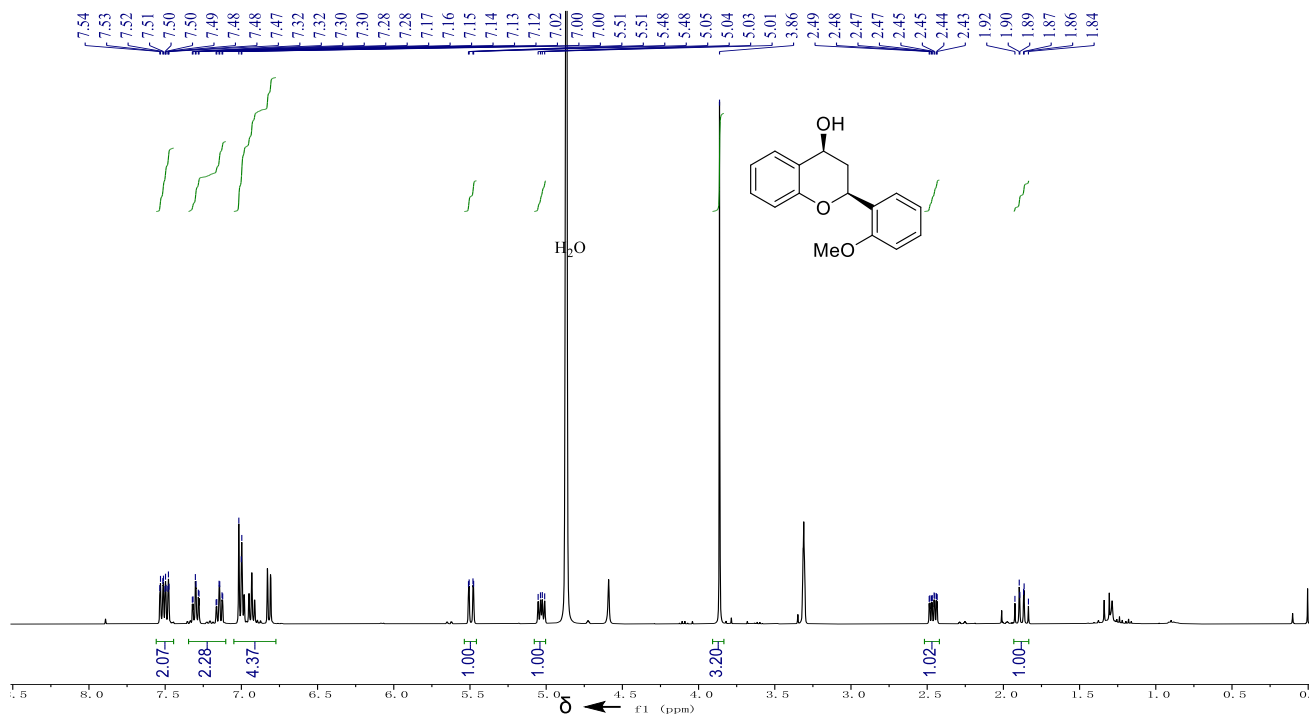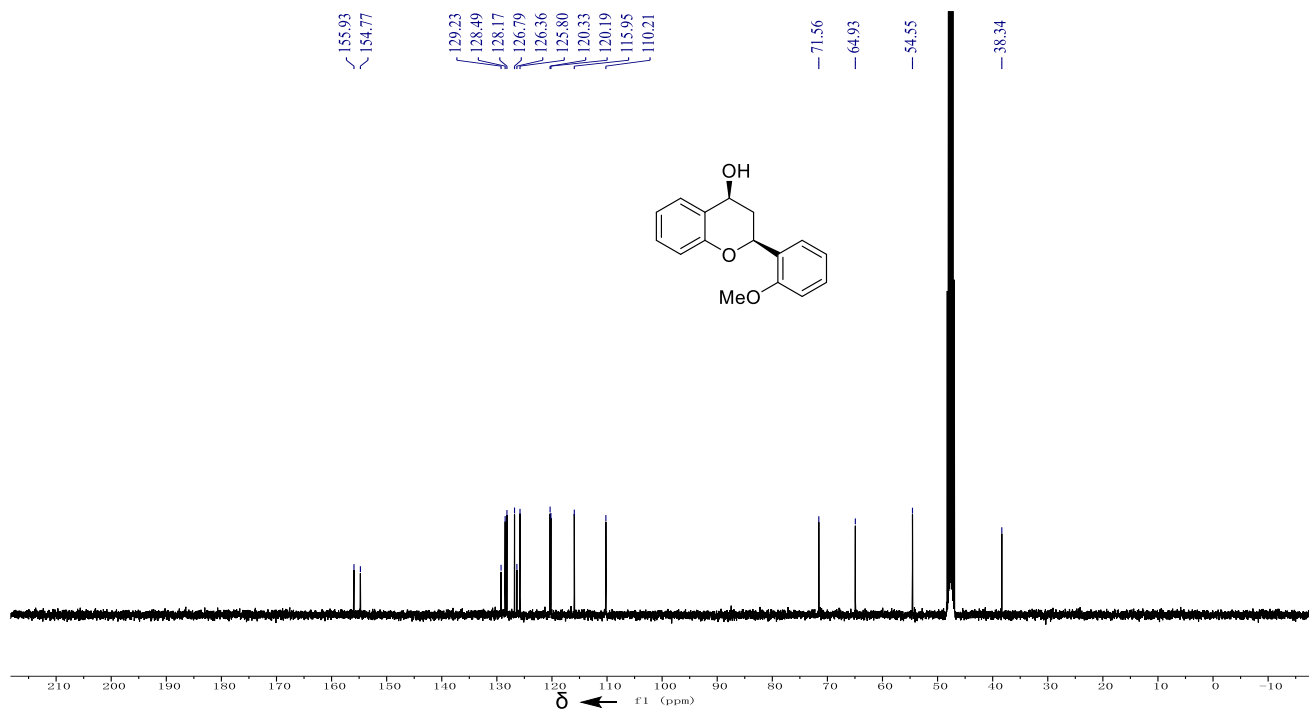

**(S,S)-7am: (2S,4S)-2-(furan-2-yl)chroman-4-ol.**

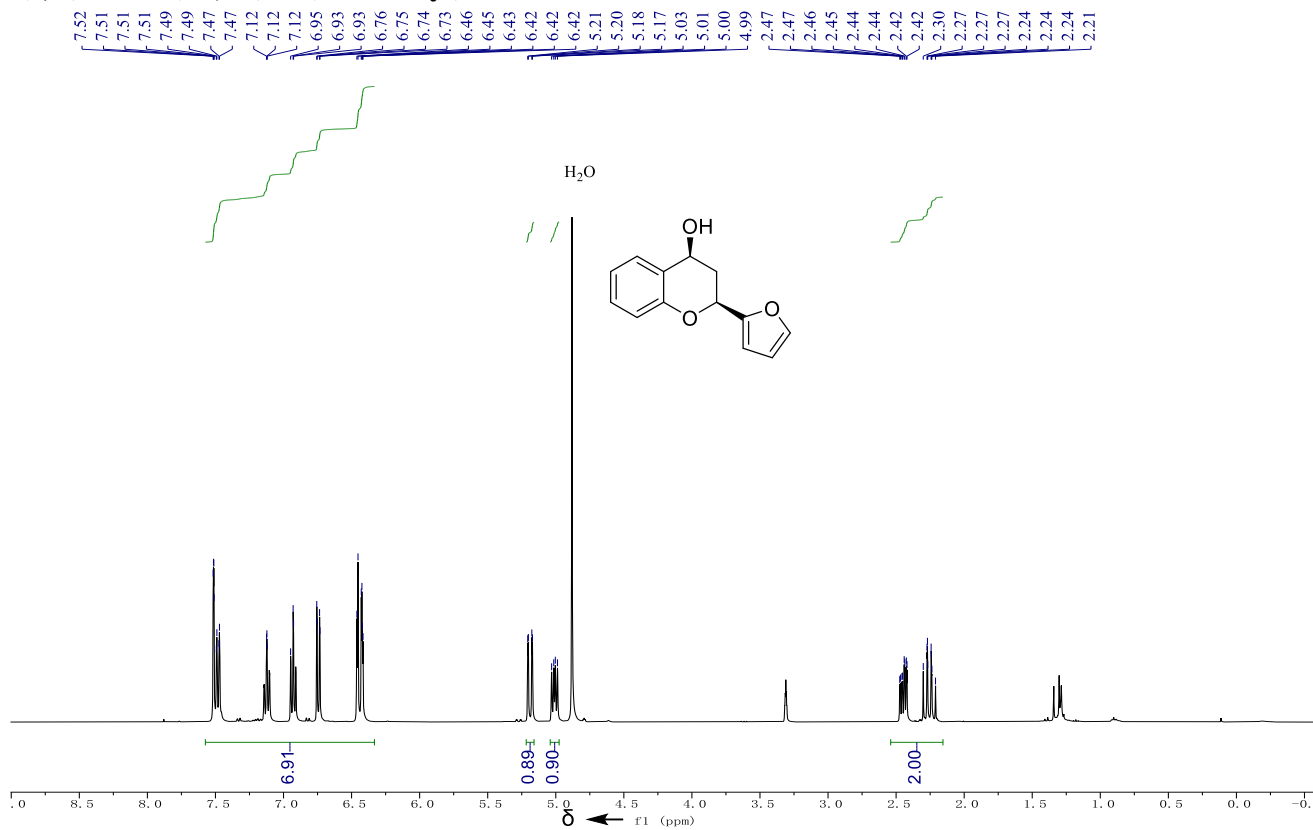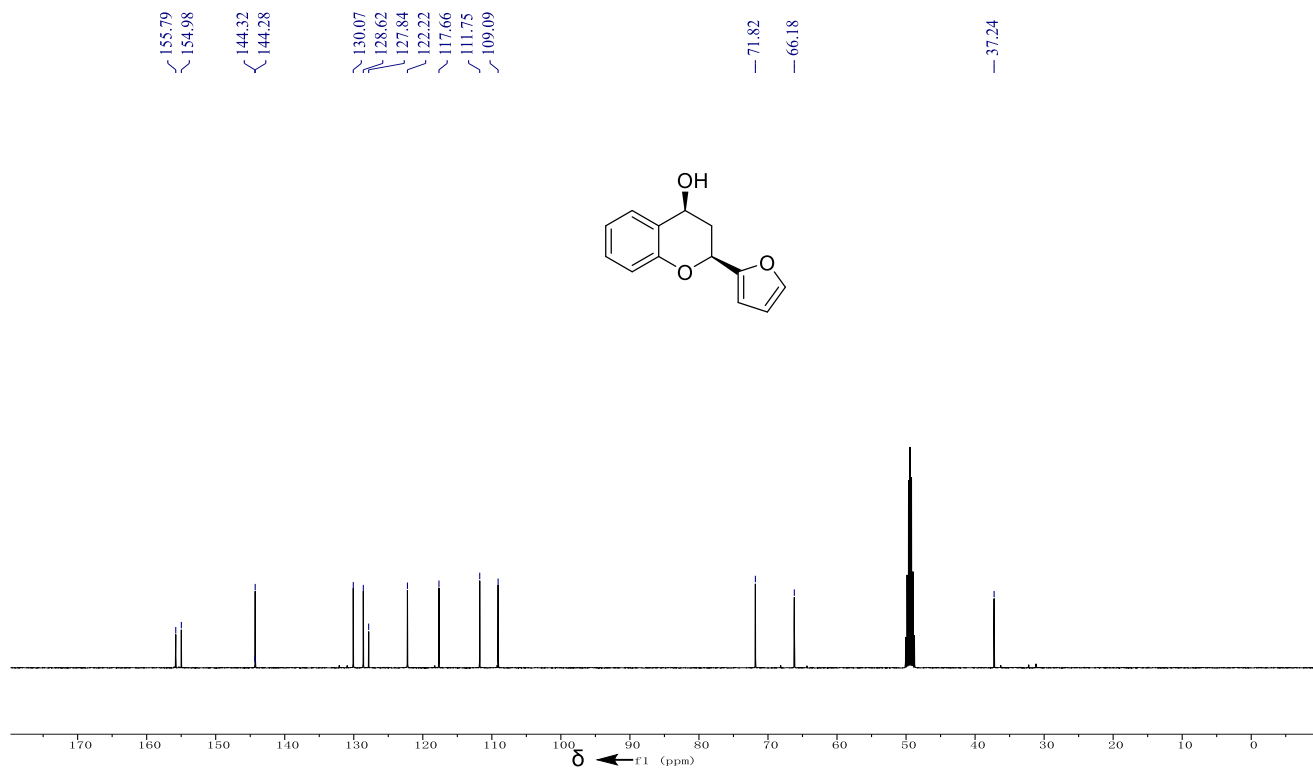

**(S,S)-7an: (2S,4S)-2-(thiophen-2-yl)chroman-4-ol.**

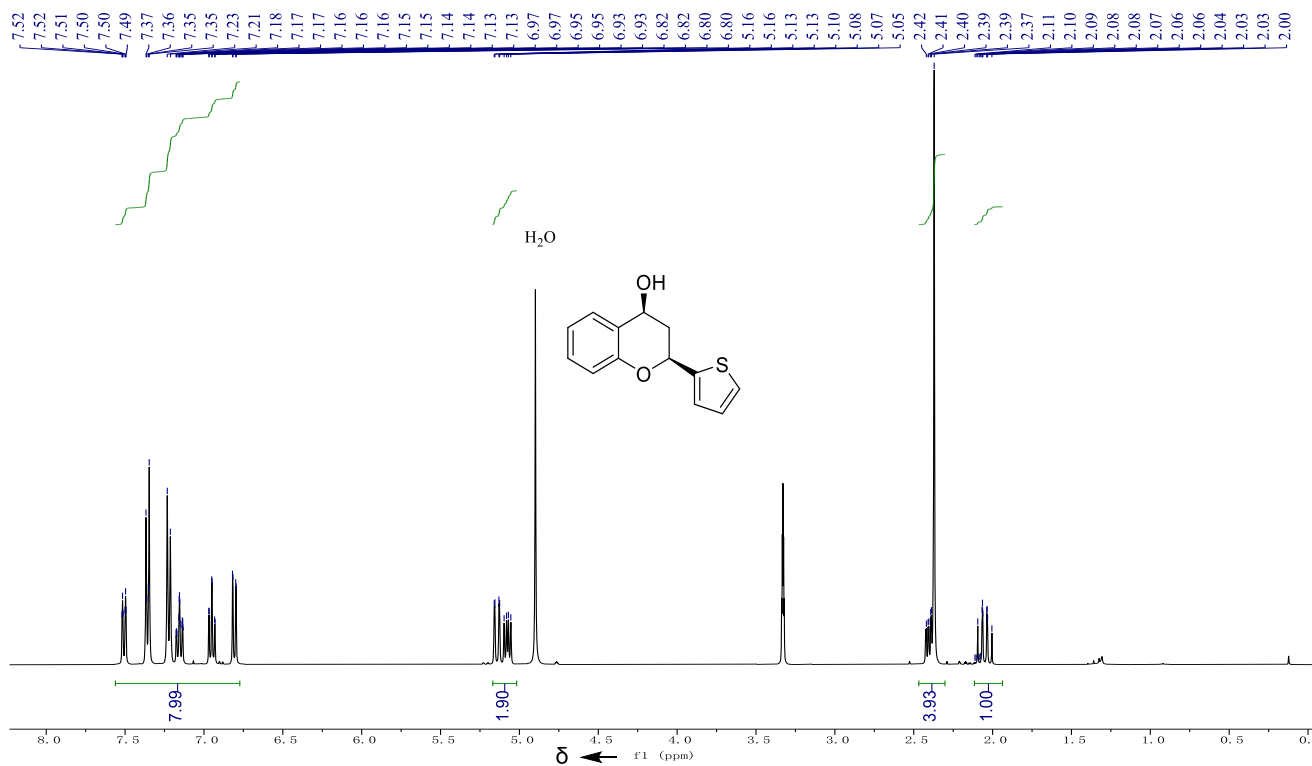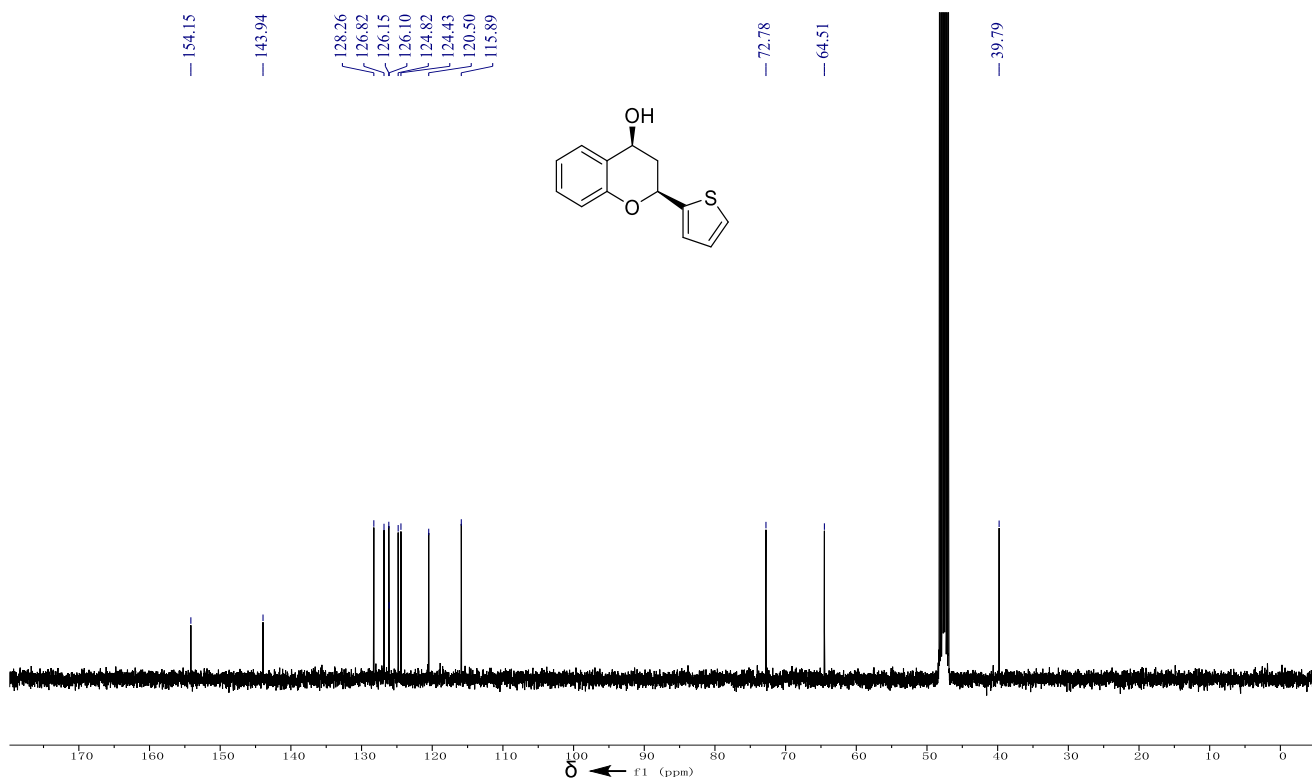

**(S,S)-7ao: (2S,4S)-6-fluoro-2-phenylchroman-4-ol.**

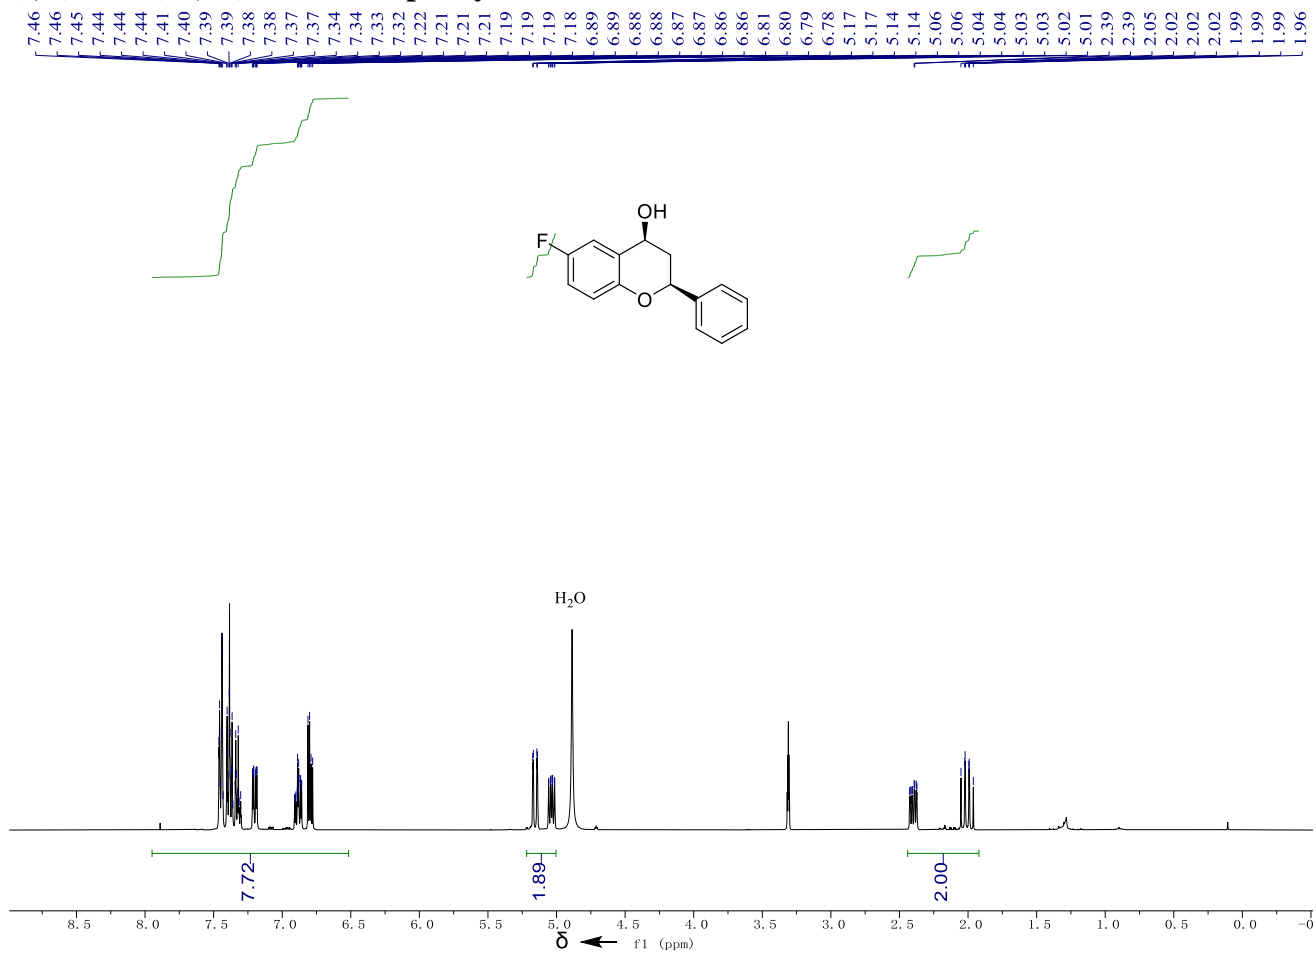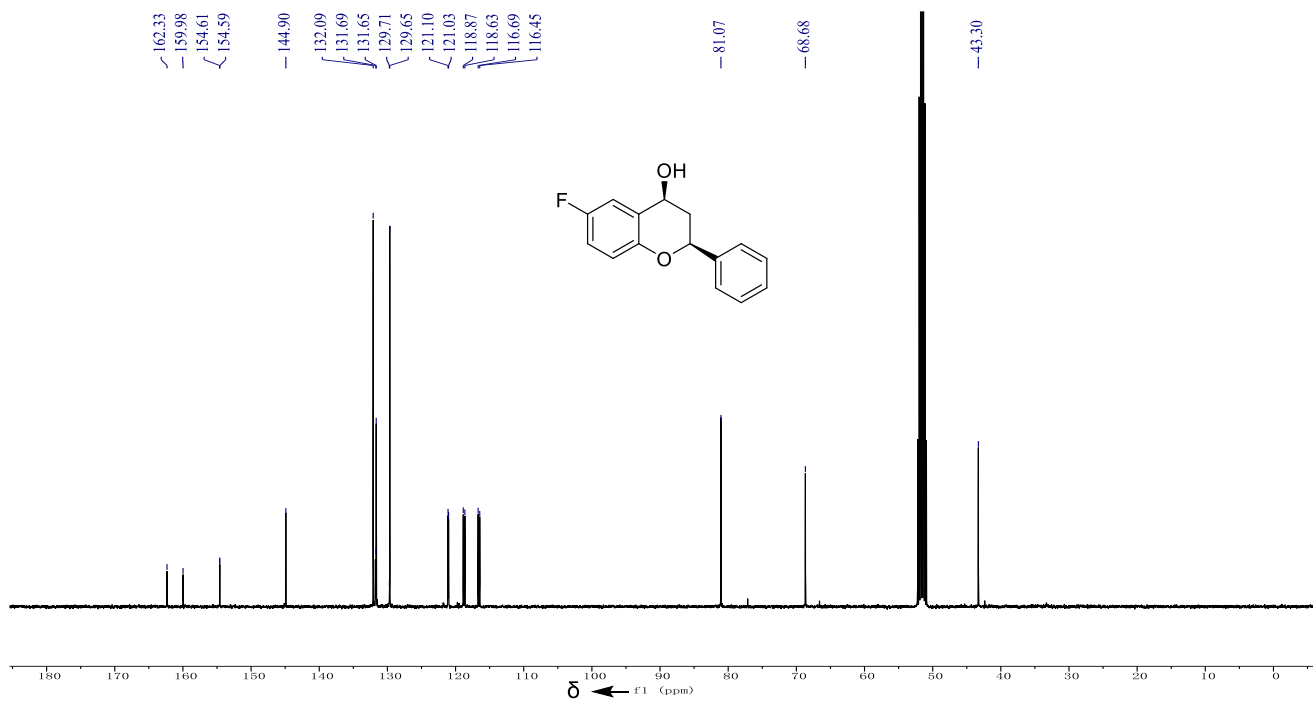

**(S,S)-7ap: (2S,4S)-6-chloro-2-phenylchroman-4-ol.**

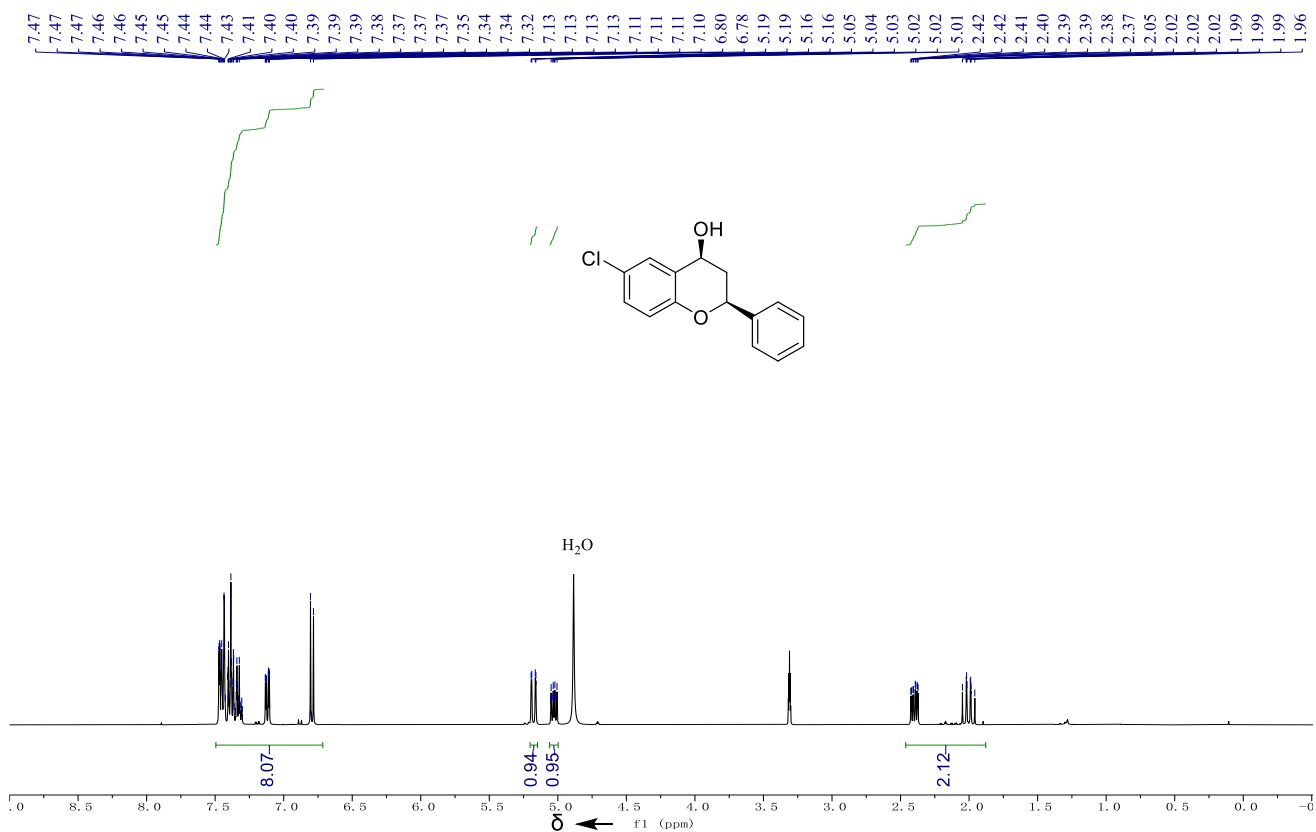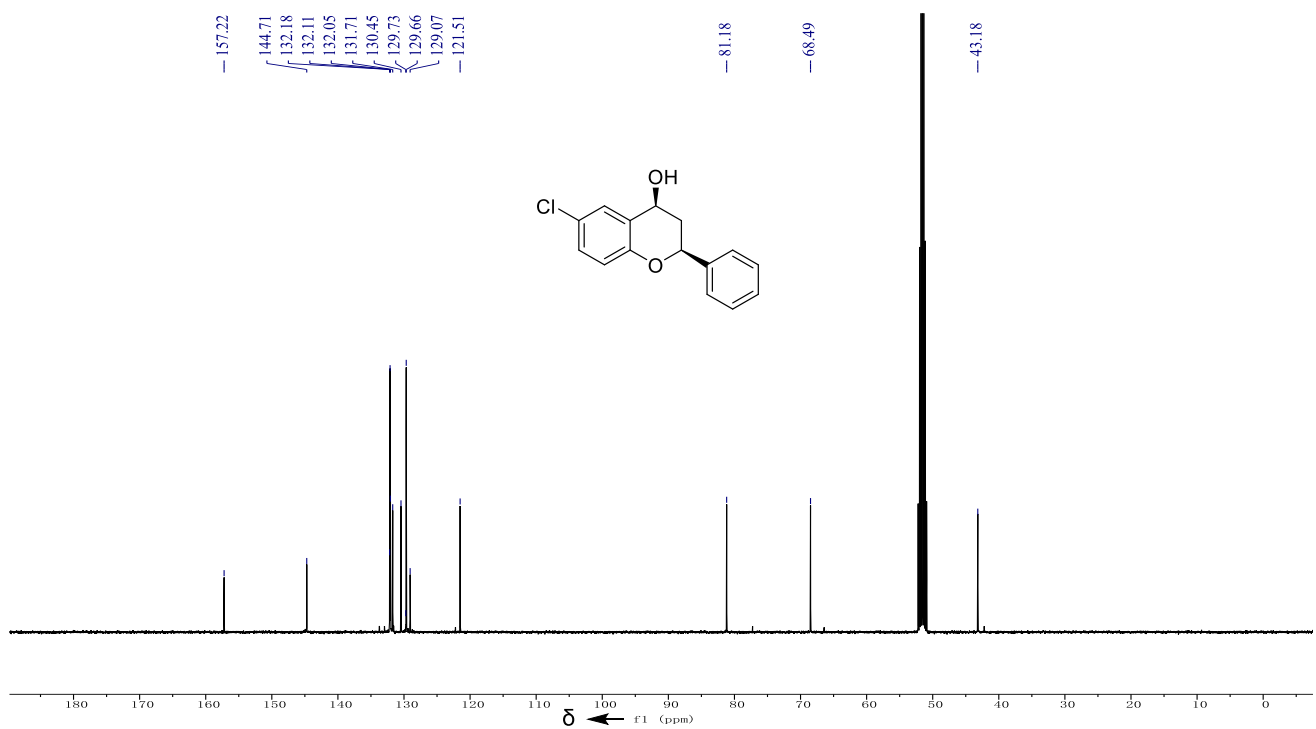

**(S,S)-7aq: (2S,4S)-6-bromo-2-phenylchroman-4-ol**

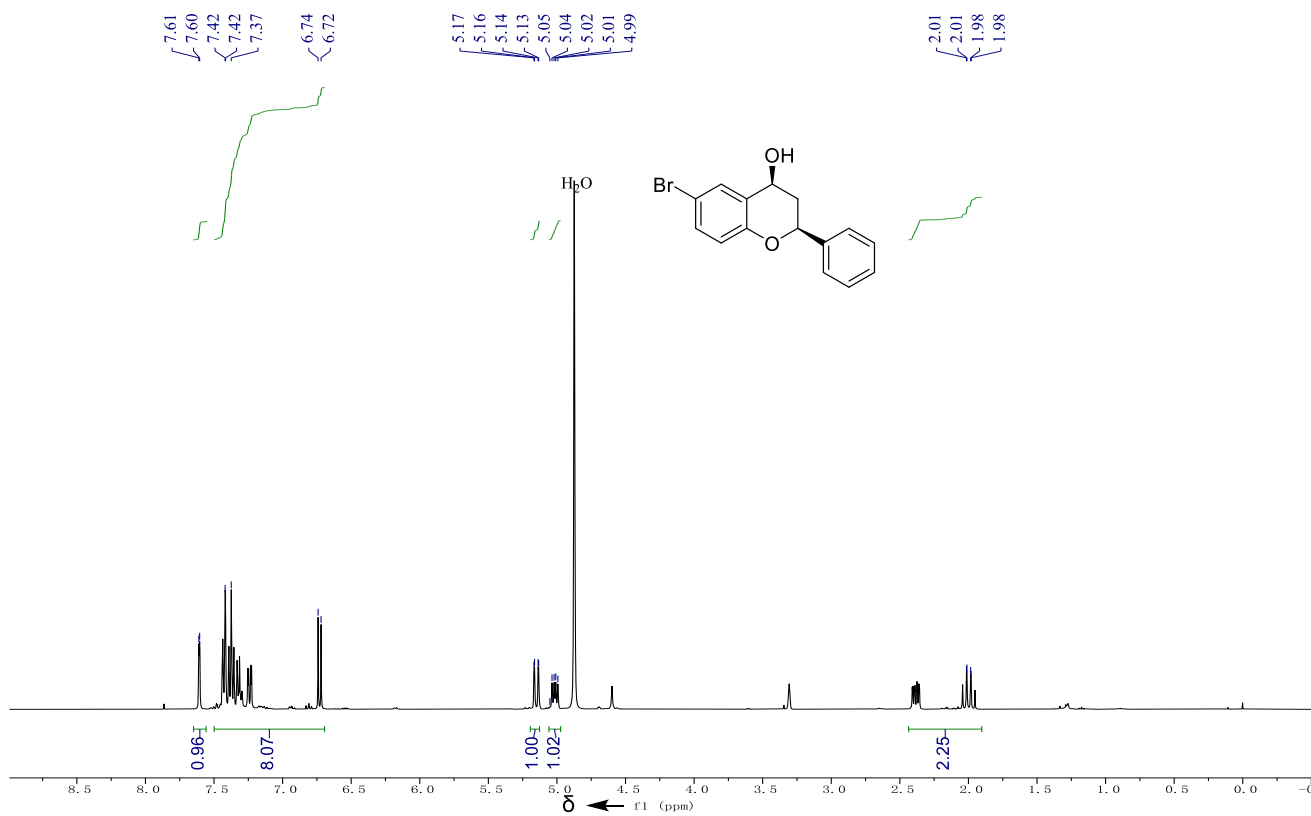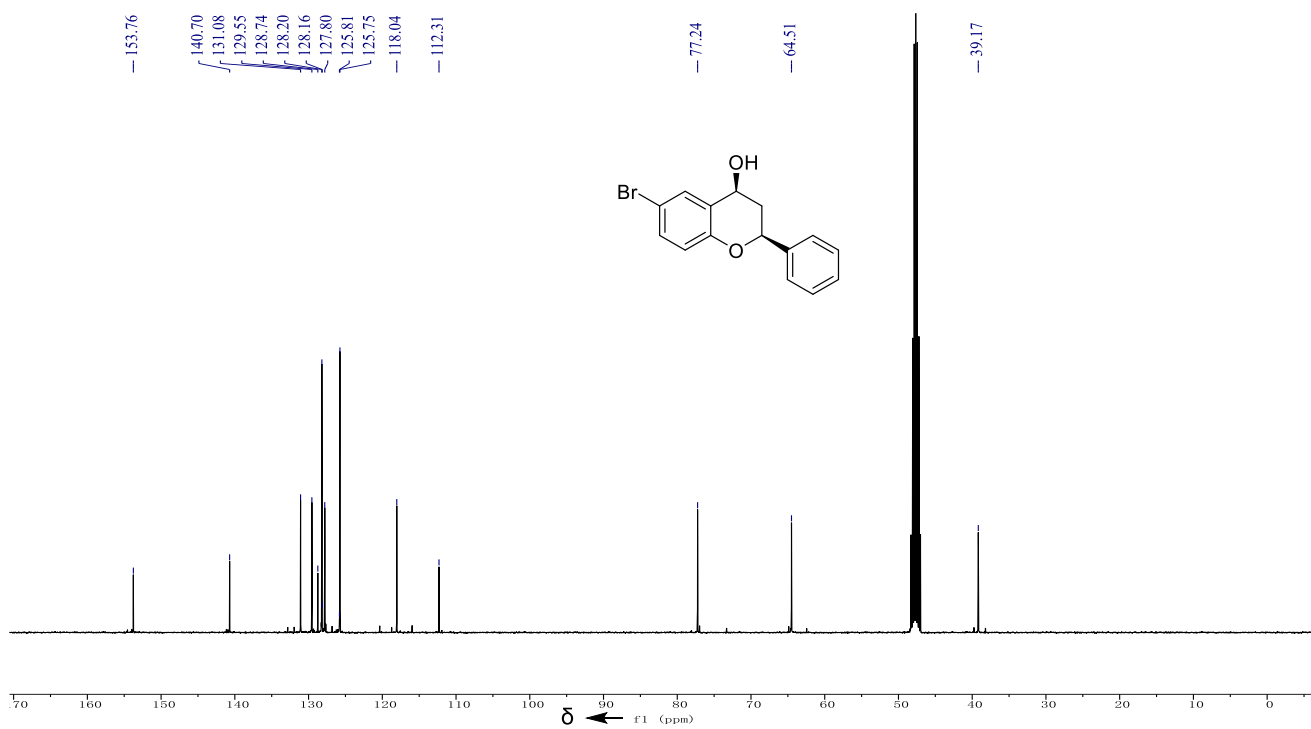

**(S,S)-7ar: (2S,4S)-6-methyl-2-phenylchroman-4-ol.**

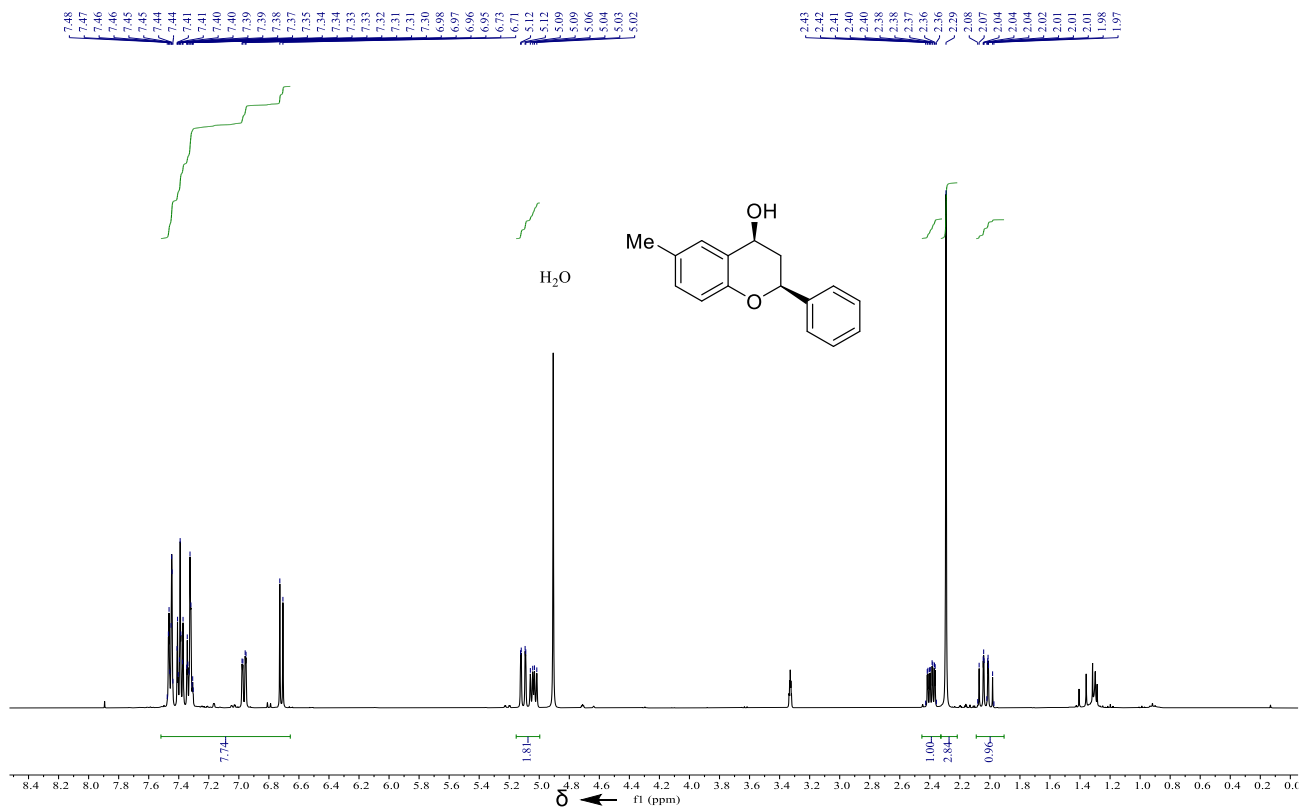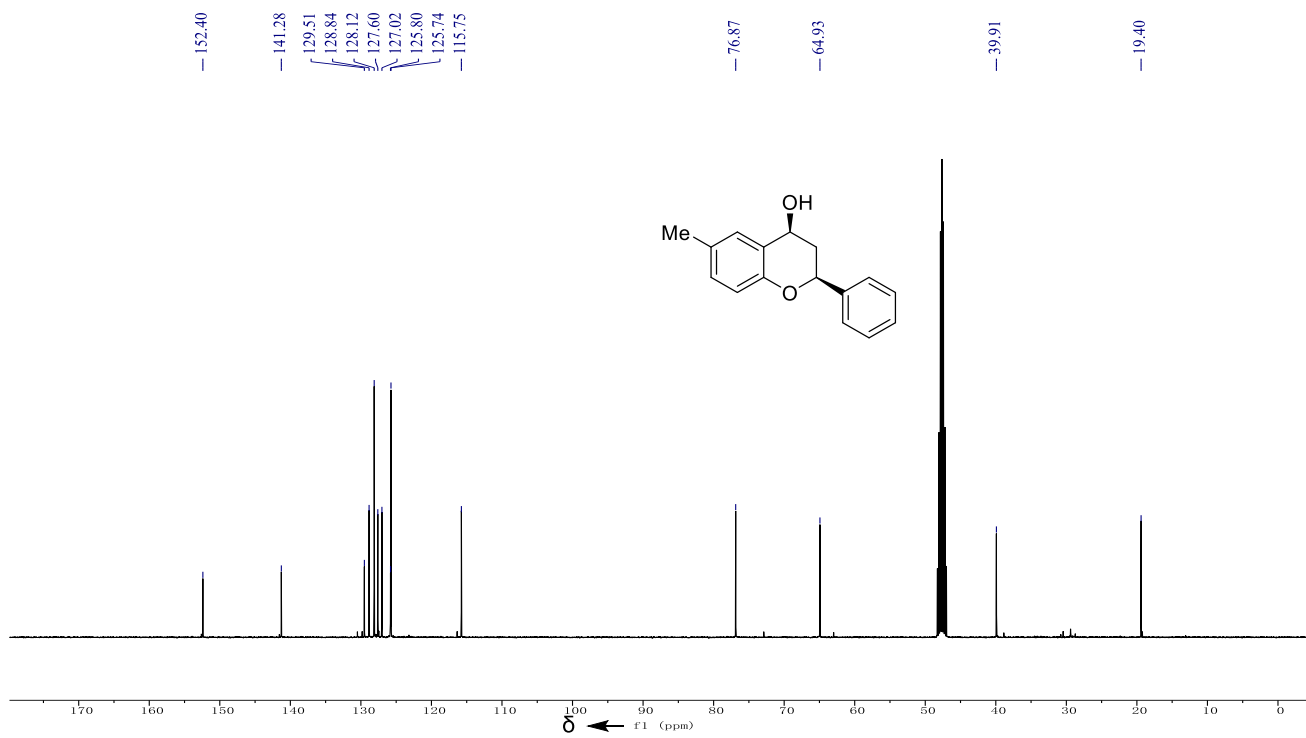

**(S,S)-7as: (2S,4S)-6-fluoro-2-(4-fluorophenyl)chroman-4-ol.**

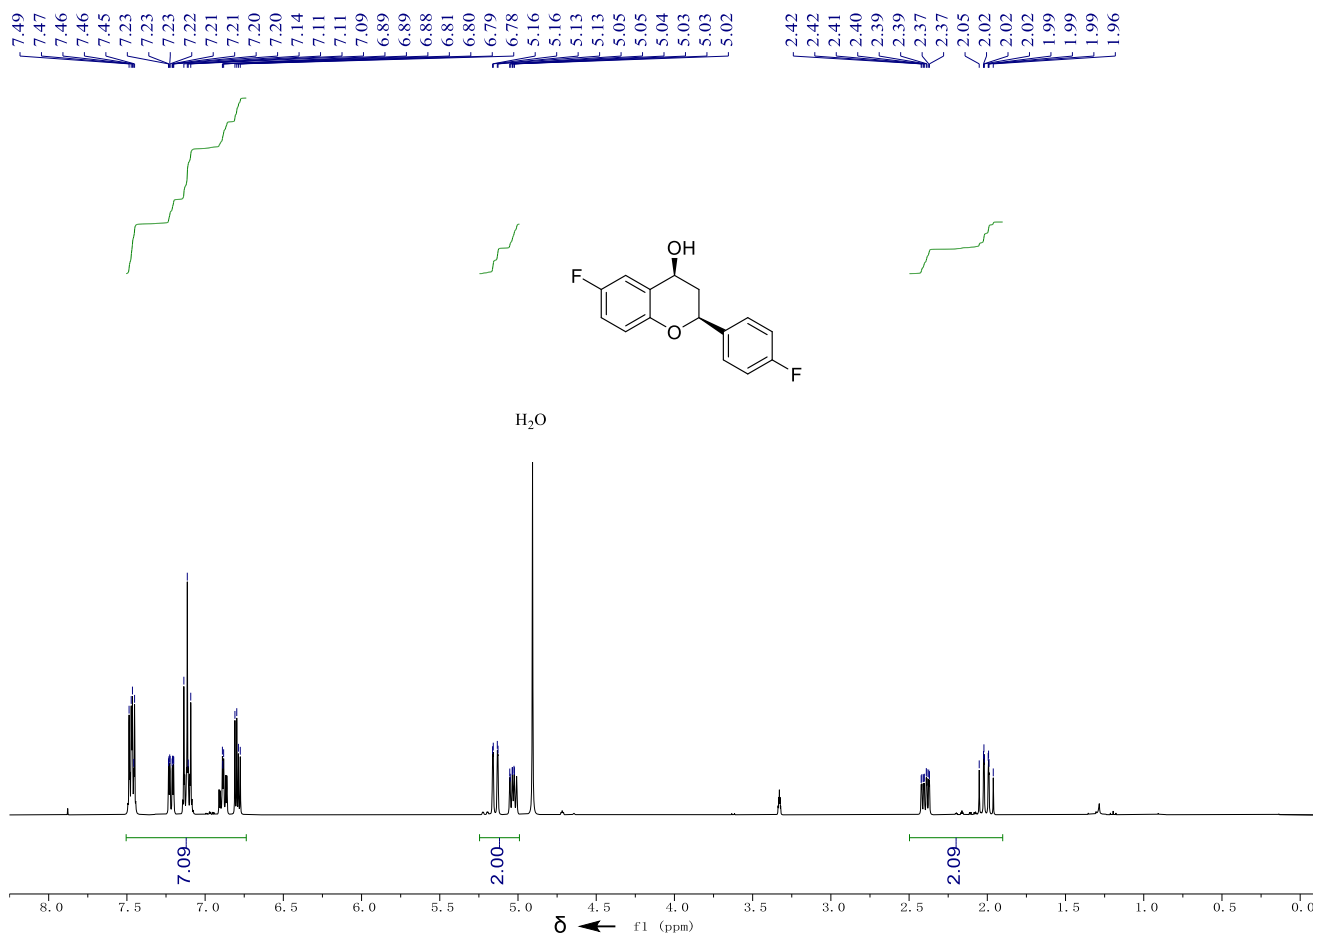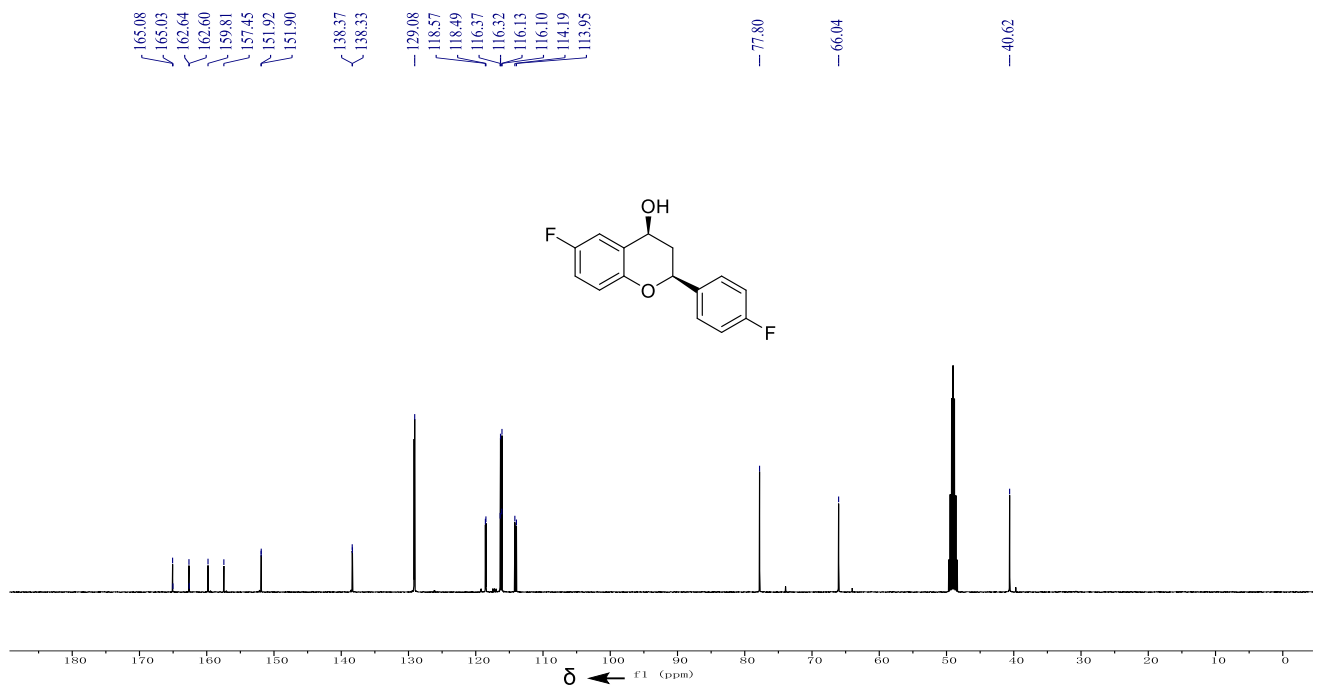



**(S,S)-7at: (2S,4S)-6-fluoro-2-(p-tolyl)chroman-4-ol.**

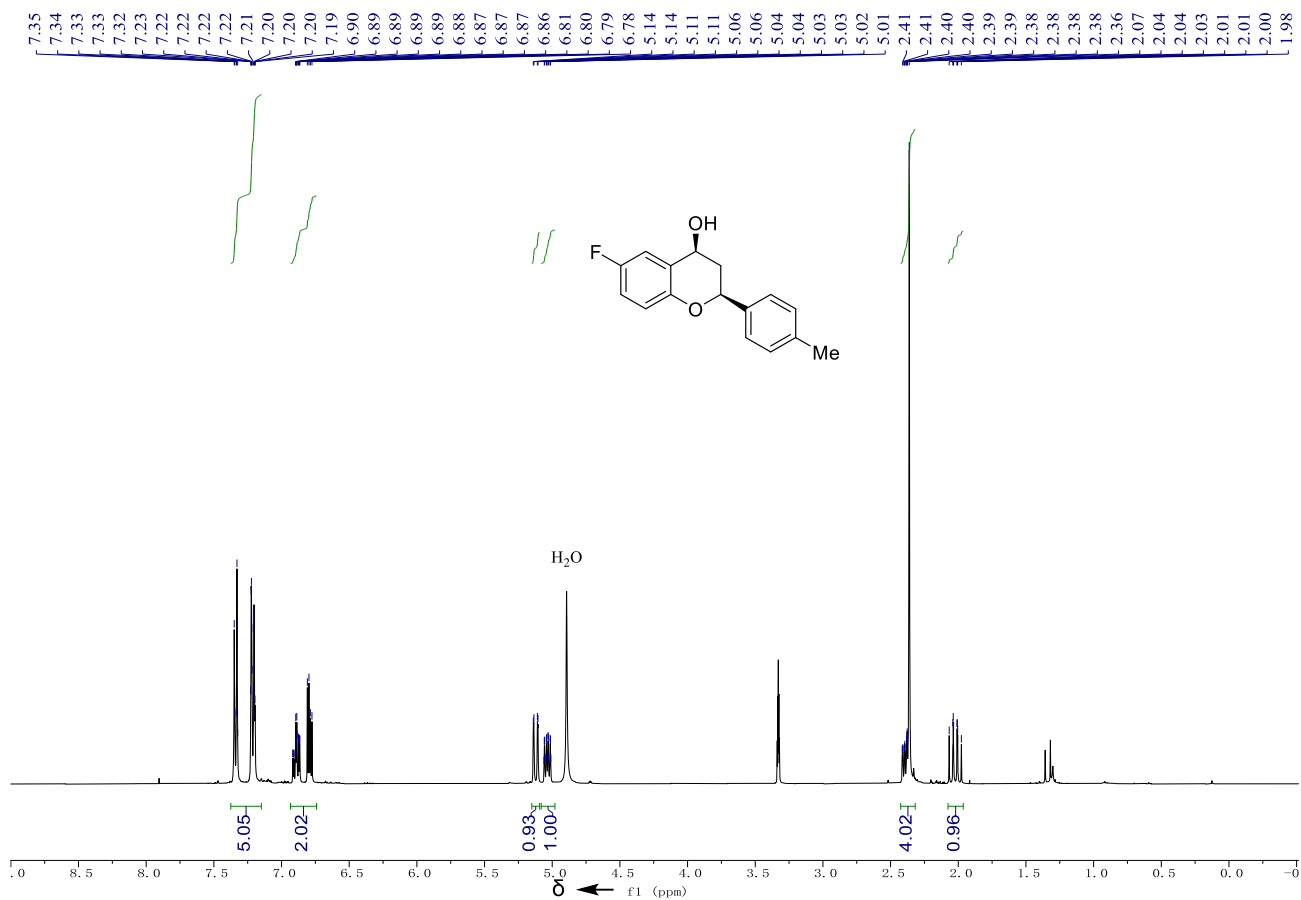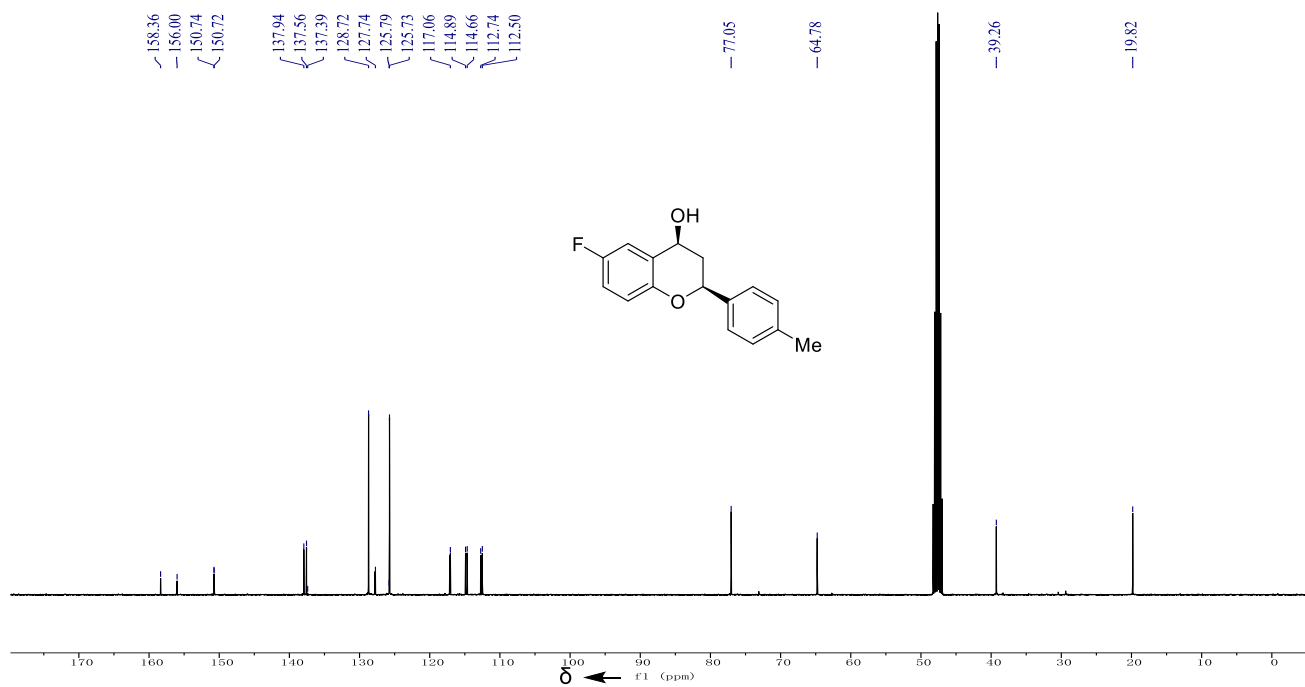

**(S,S)-4au: (2S,4S)-2-(3,4-difluorophenyl)-6-methylchroman-4-ol.**

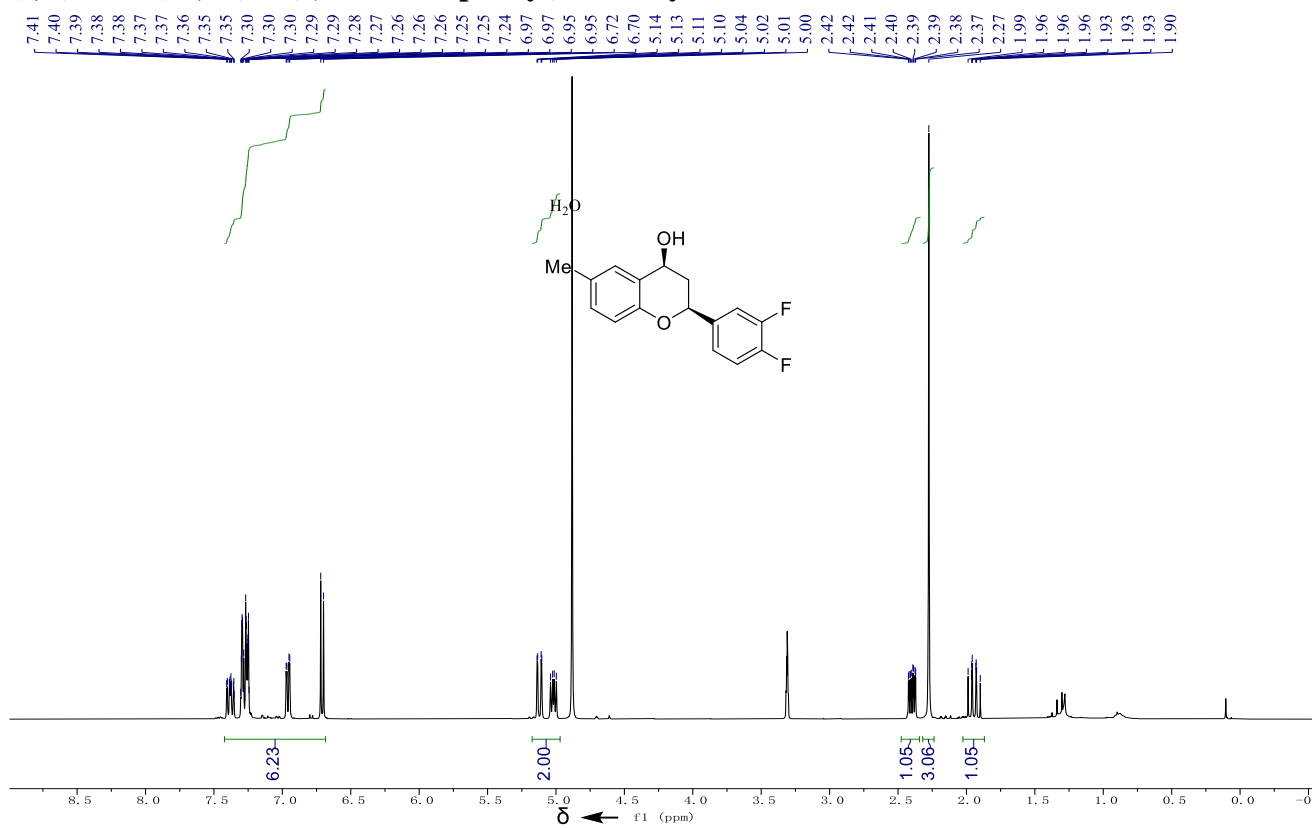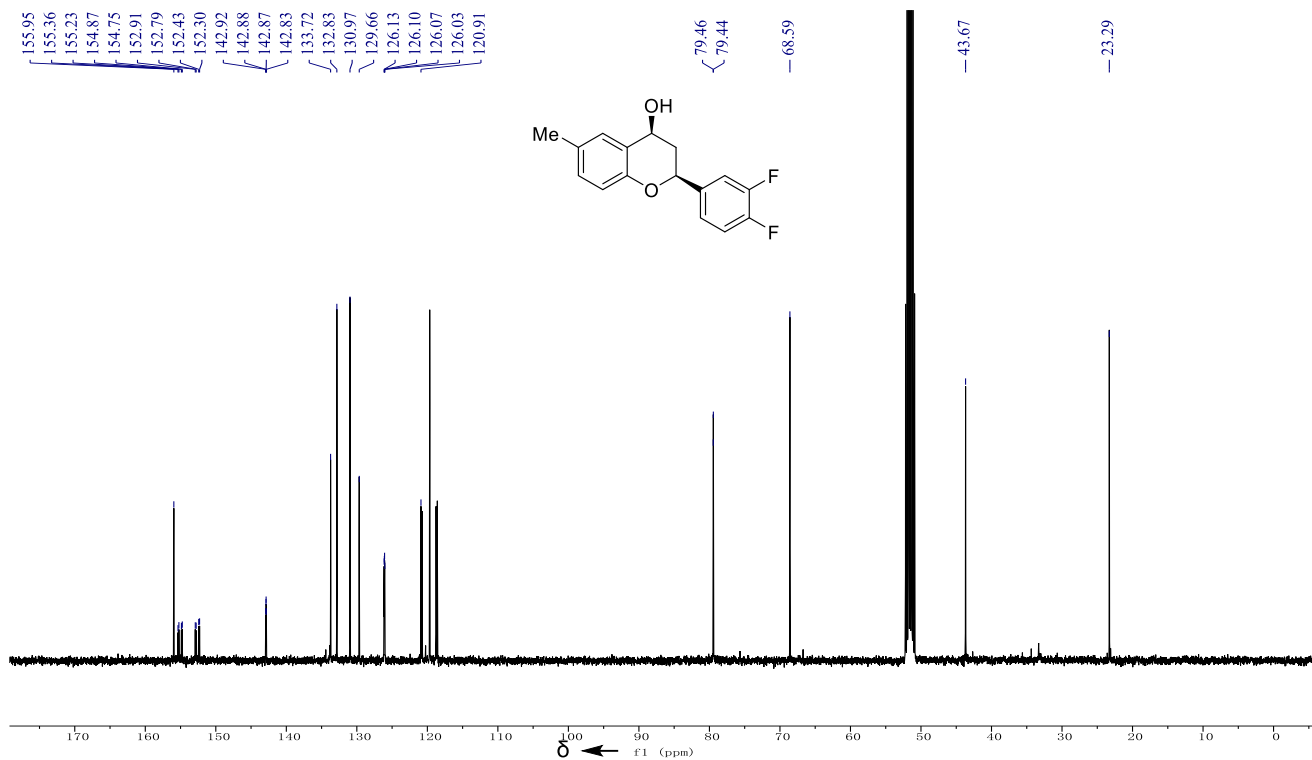

**(R,S)-7ba: (2R,4S)-2-methylchroman-4-ol.**

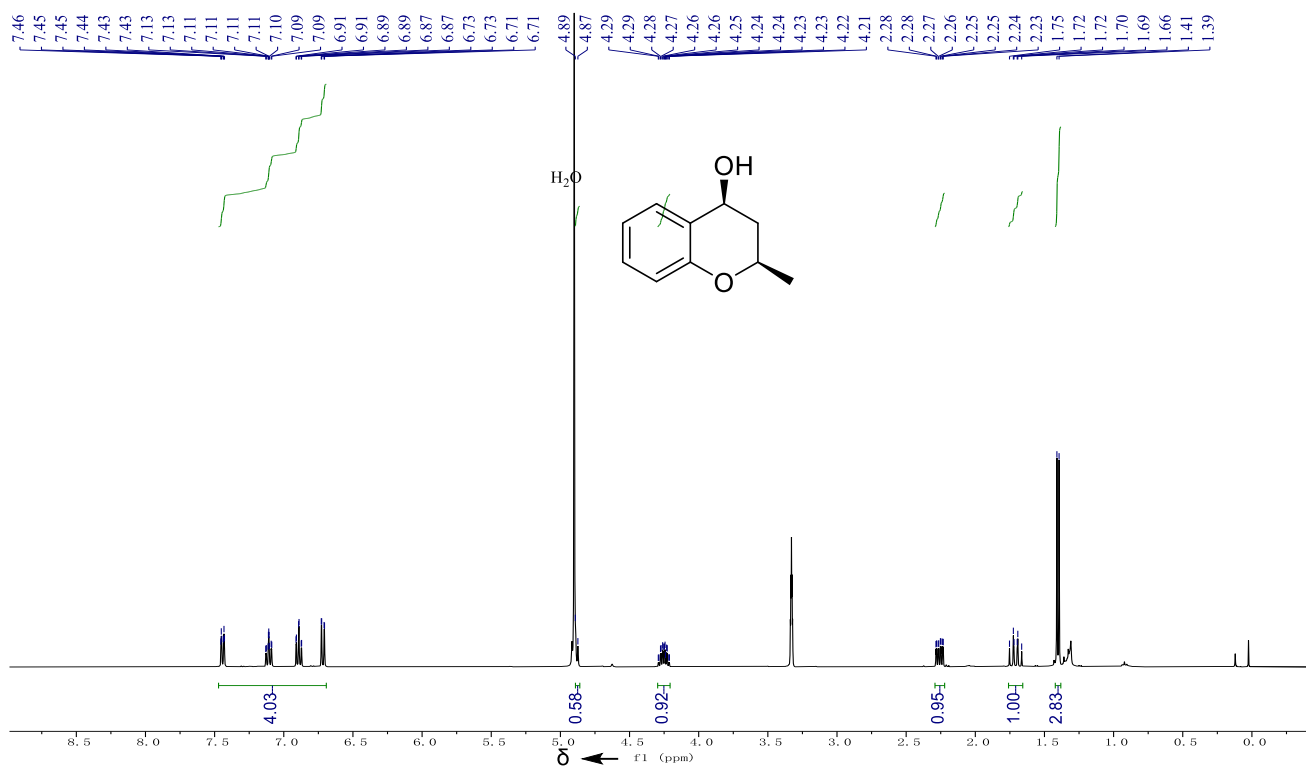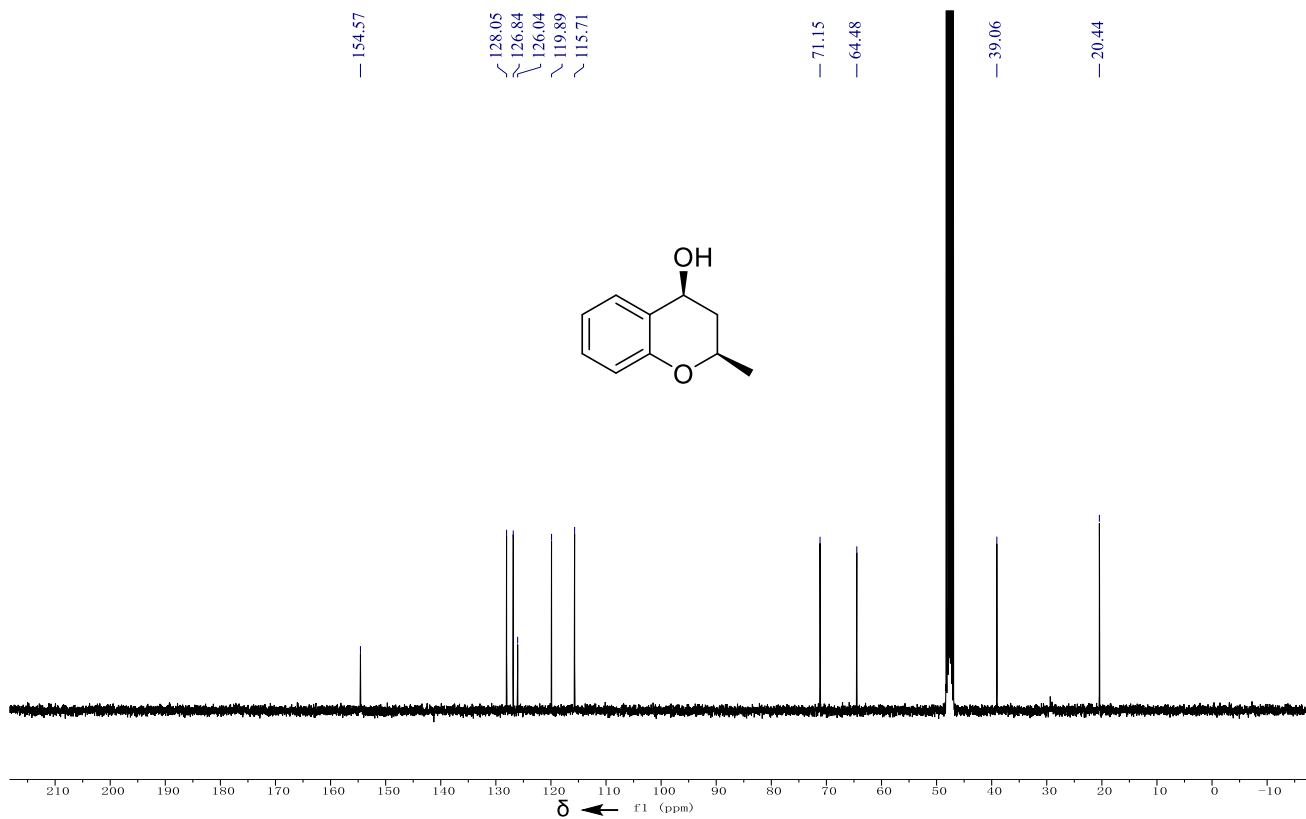

**(R,S)-7bb: (2R,4S)-2-ethylchroman-4-ol.**

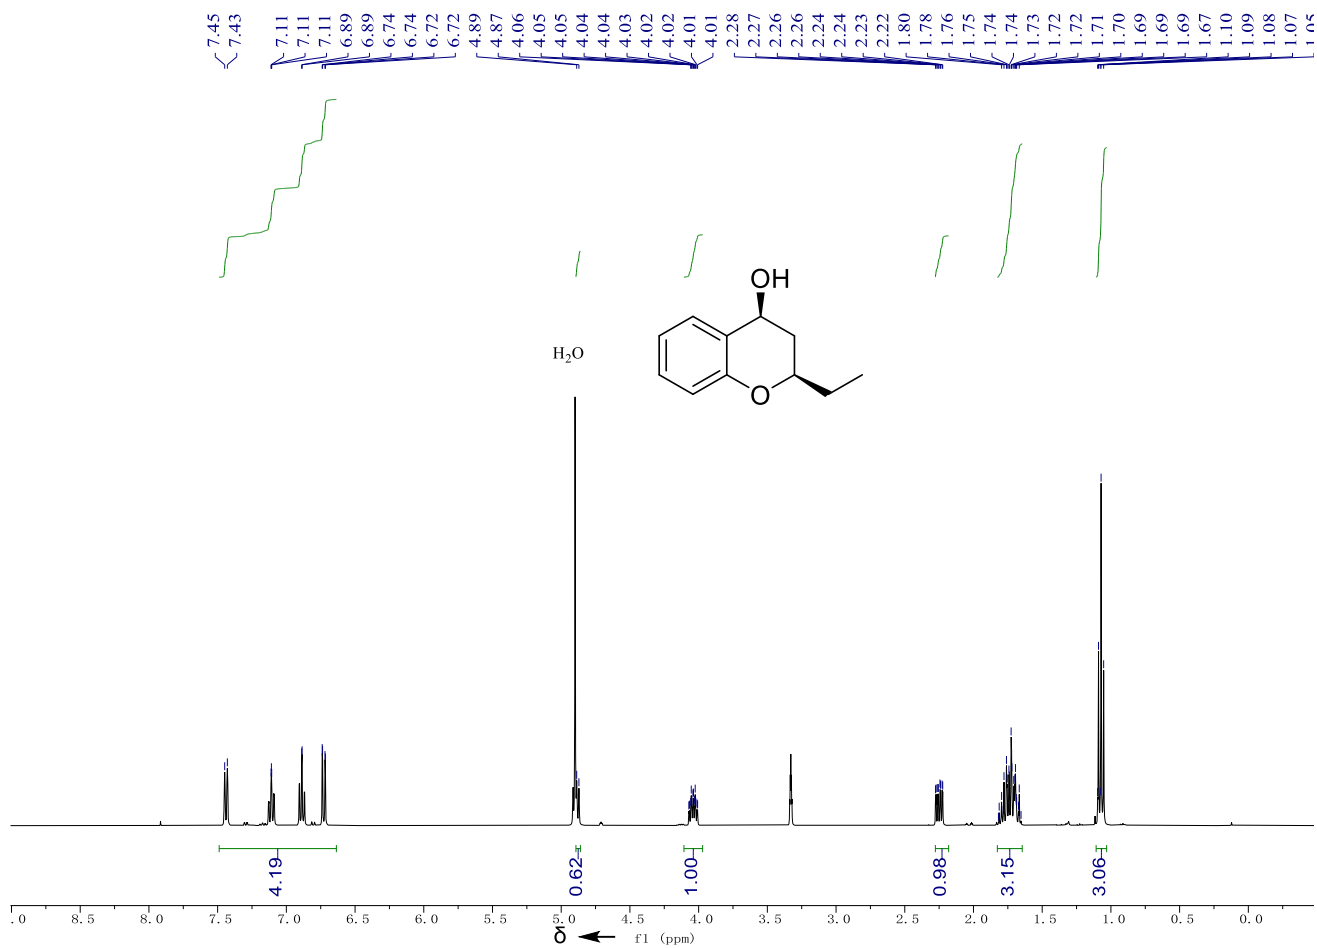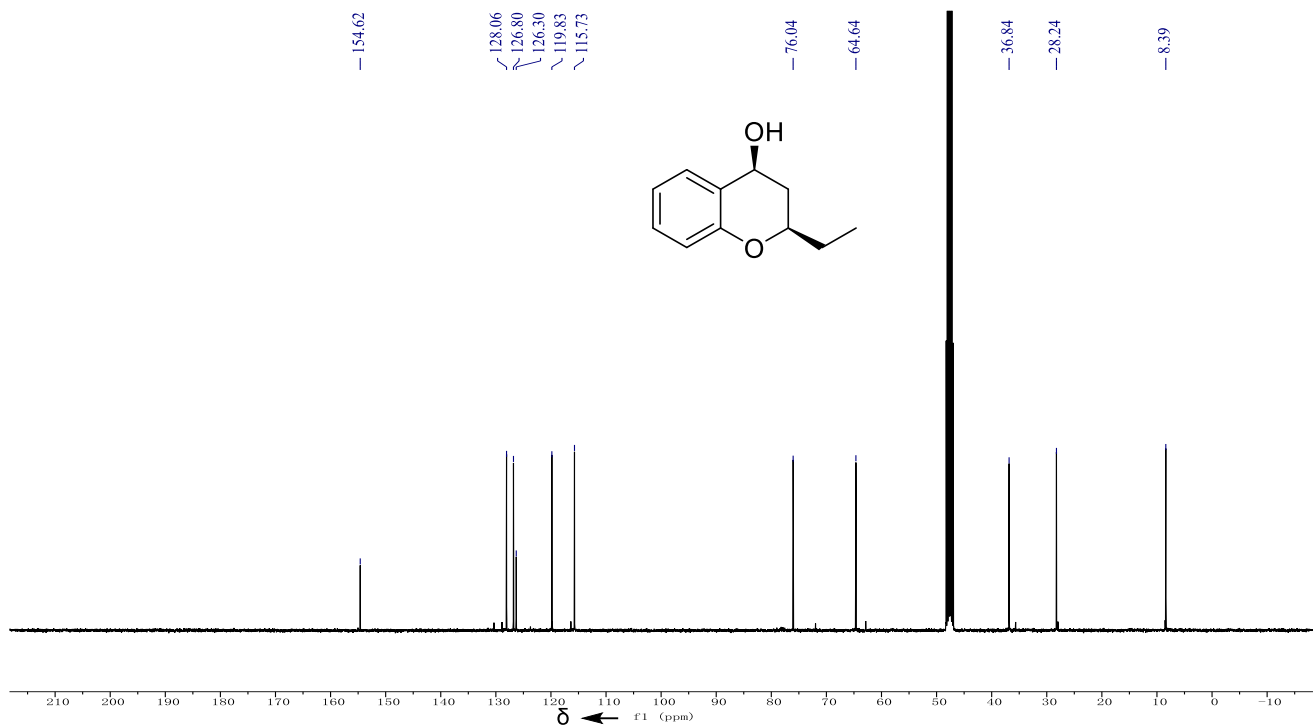

**(R,S)-7bc: (2R,4S)-2-propylchroman-4-ol.**

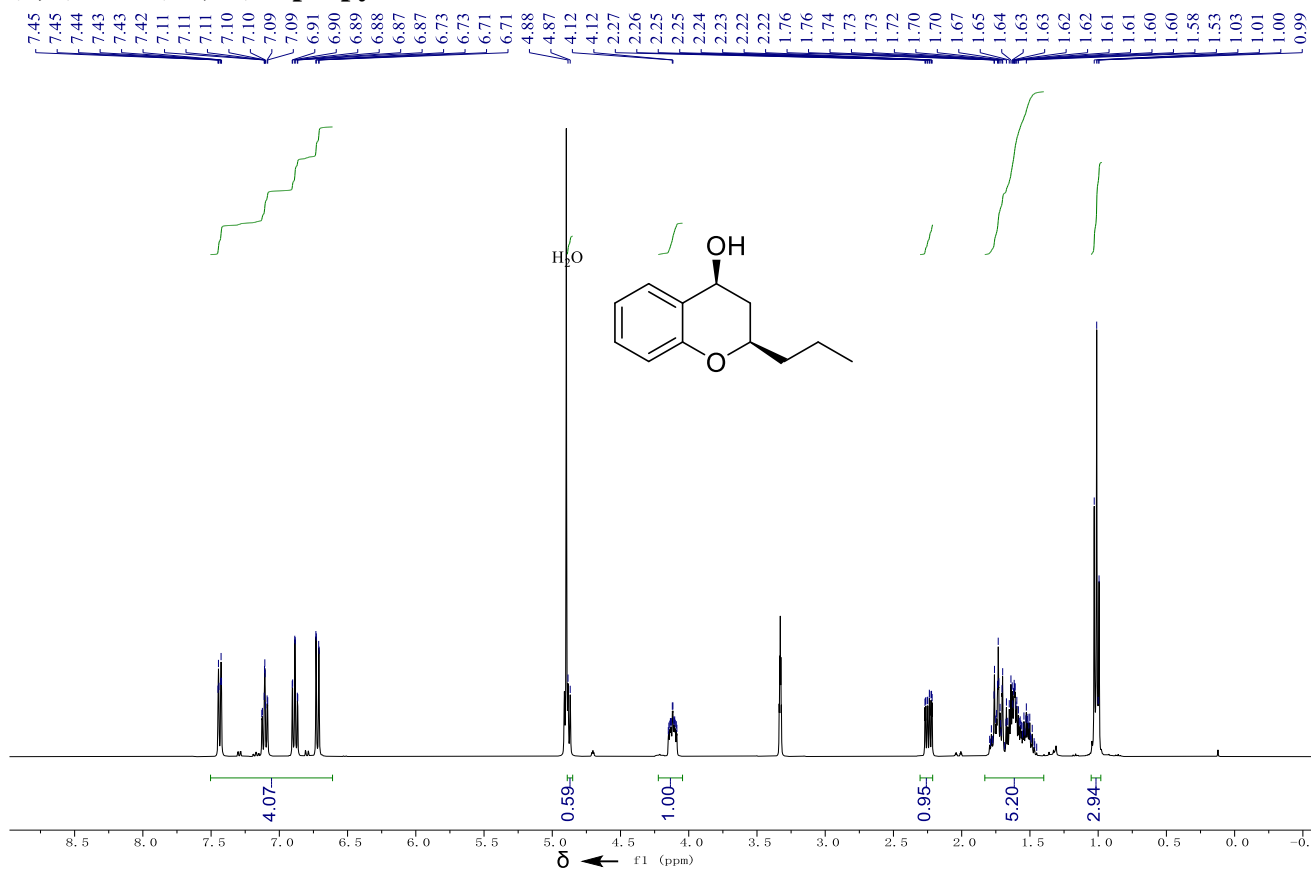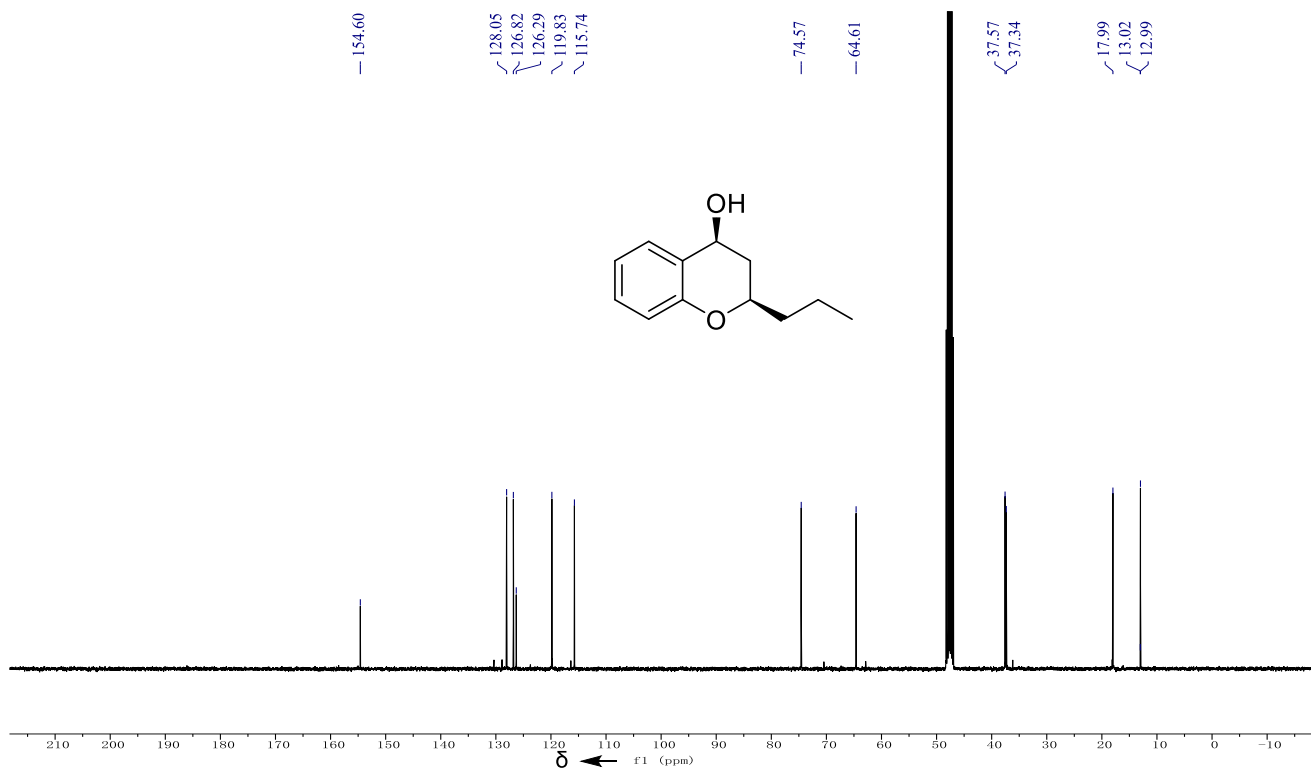

**(S,S)-7bd: (2S,4S)-2-isopropylchroman-4-ol**

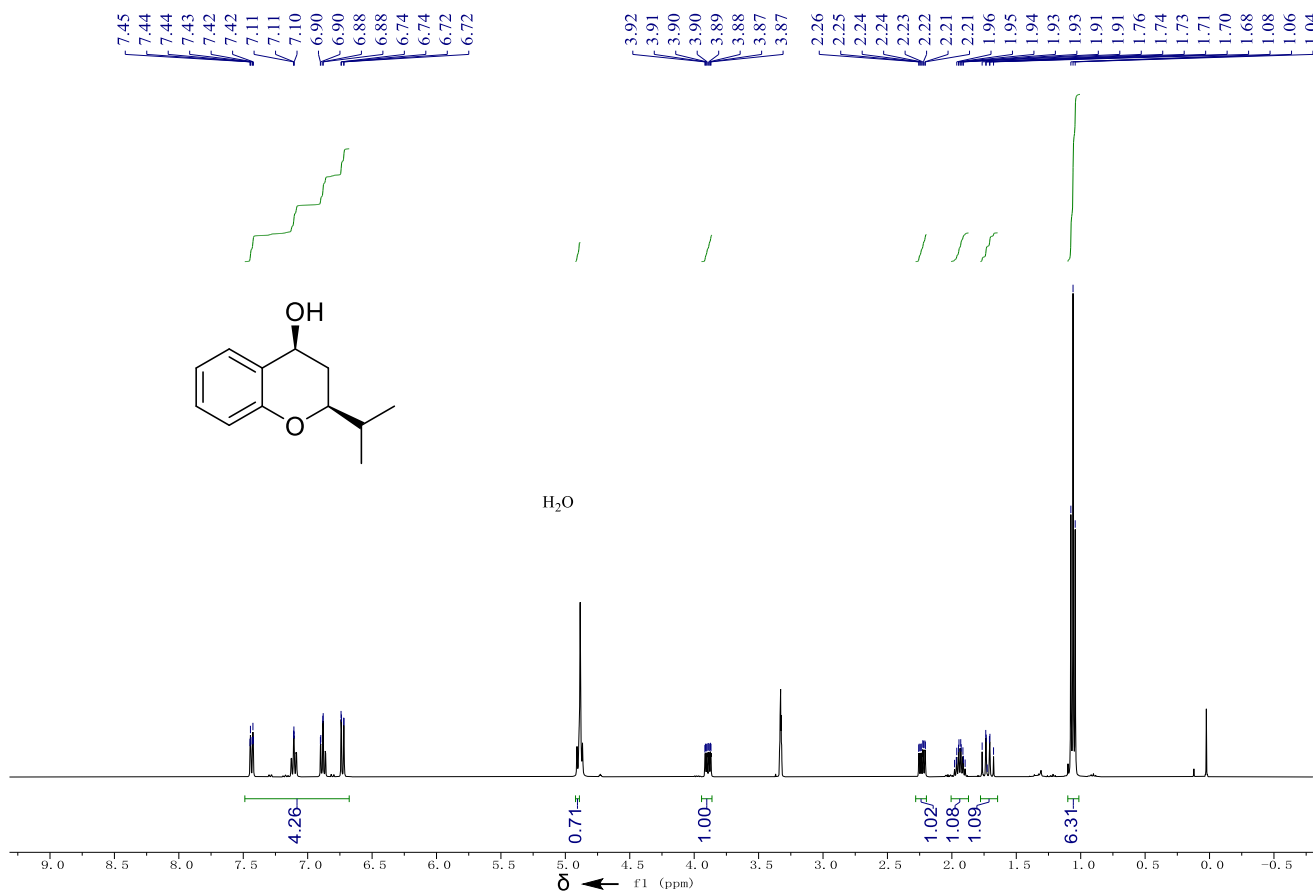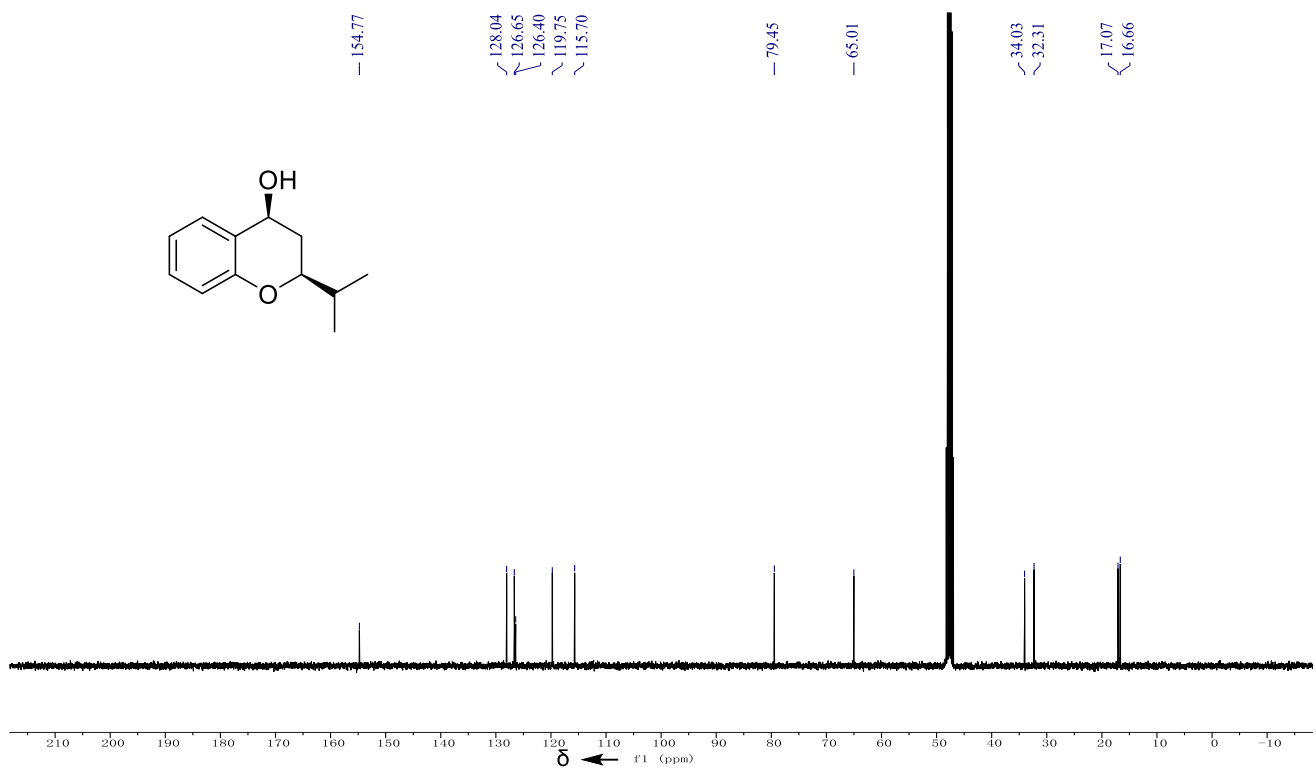

**(R,S)-7be: (2R,4S)-2-isobutylchroman-4-ol**

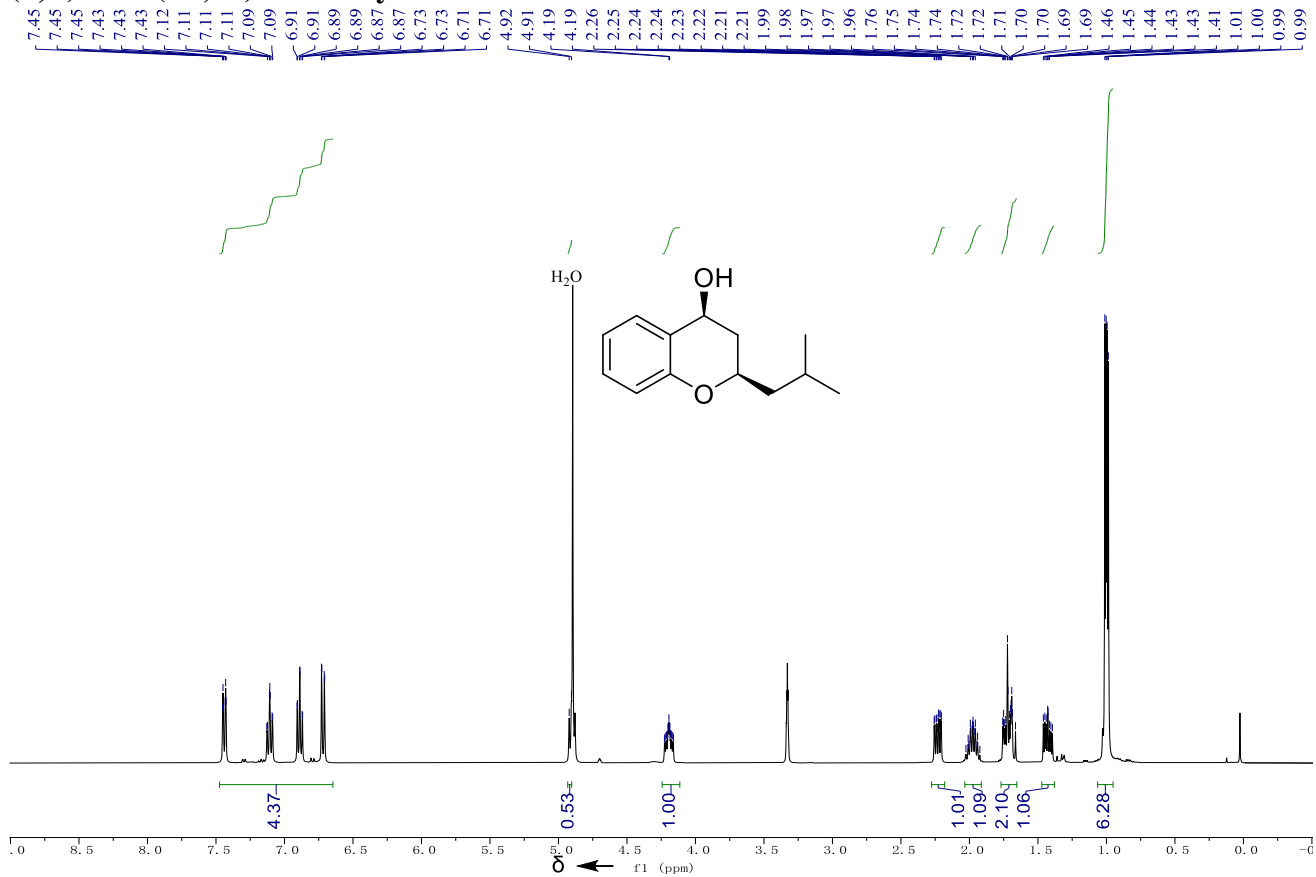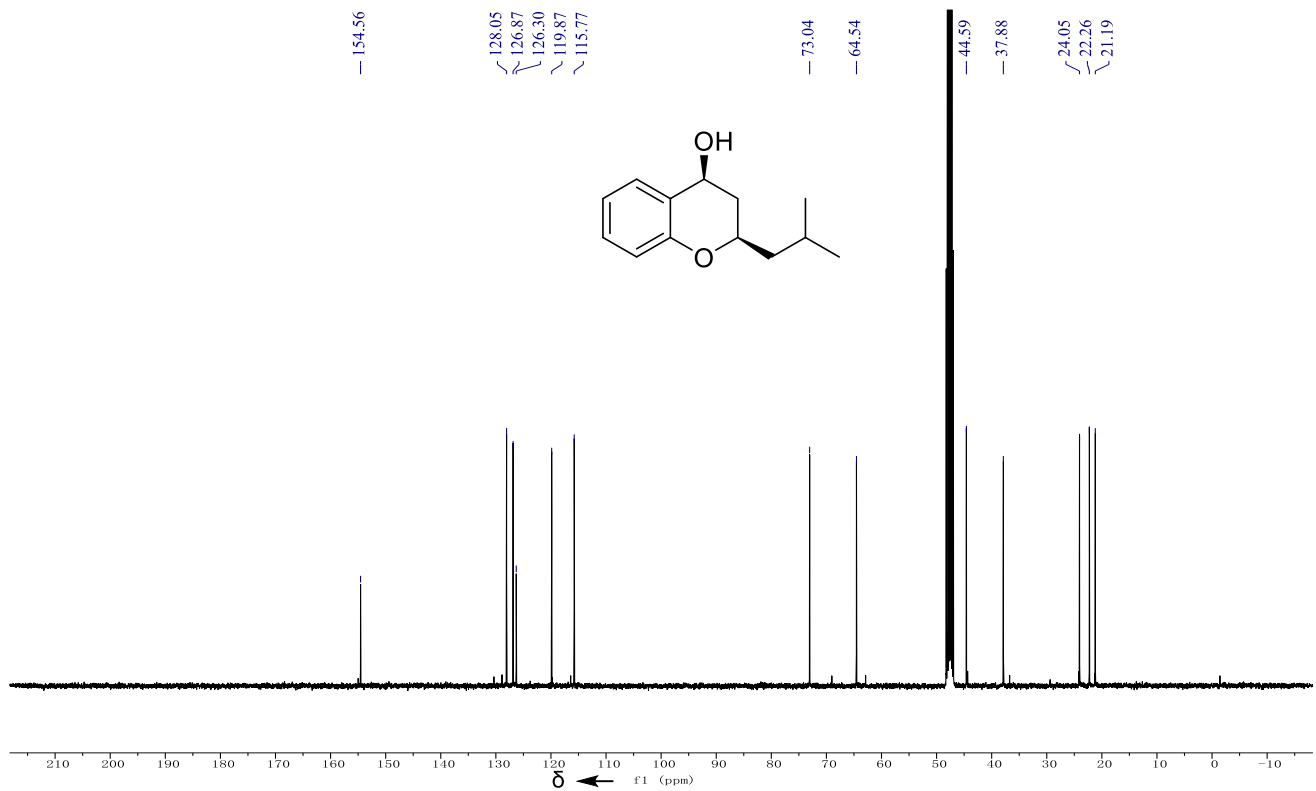

**(S,S)-7bf: (2S,4S)-2-(3,4-difluorophenyl)-6-methylchroman-4-ol.**

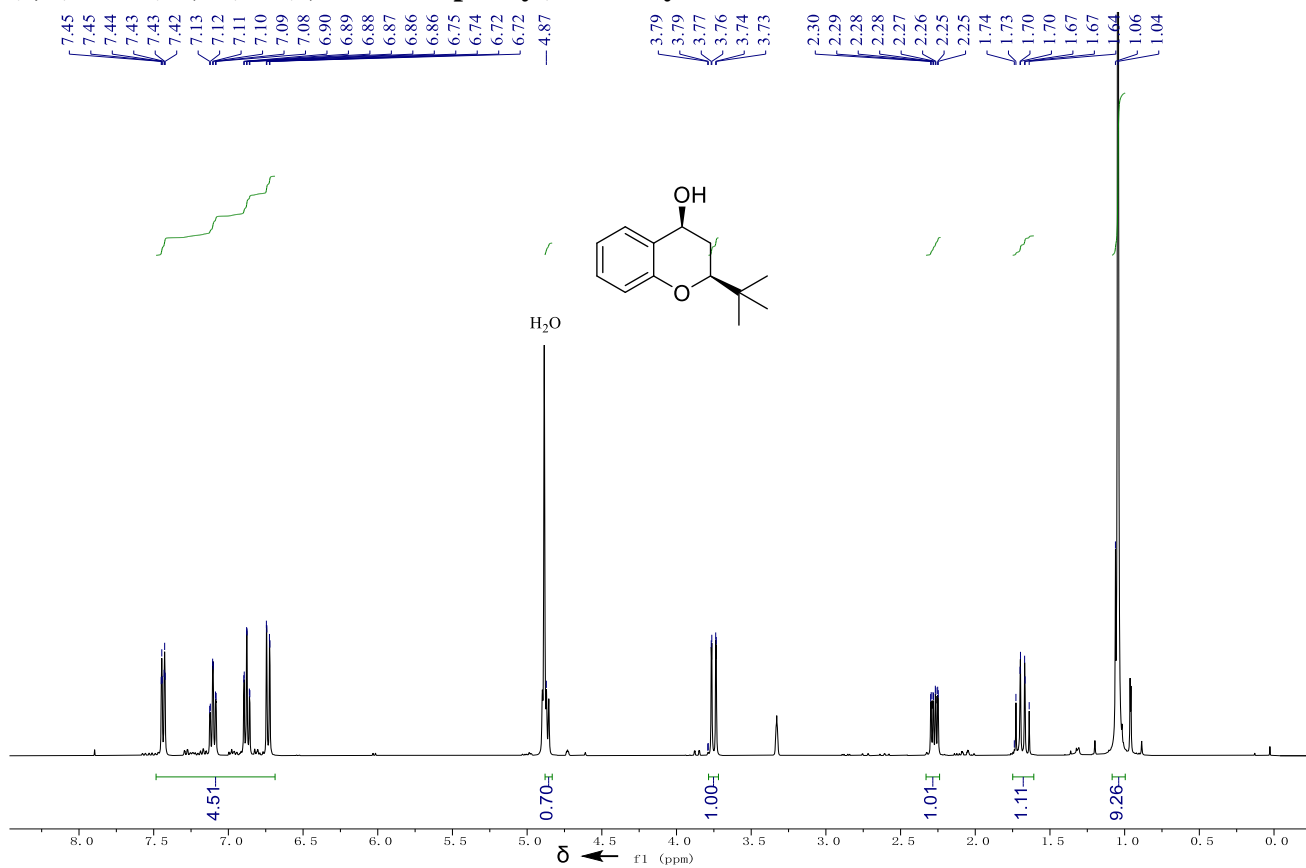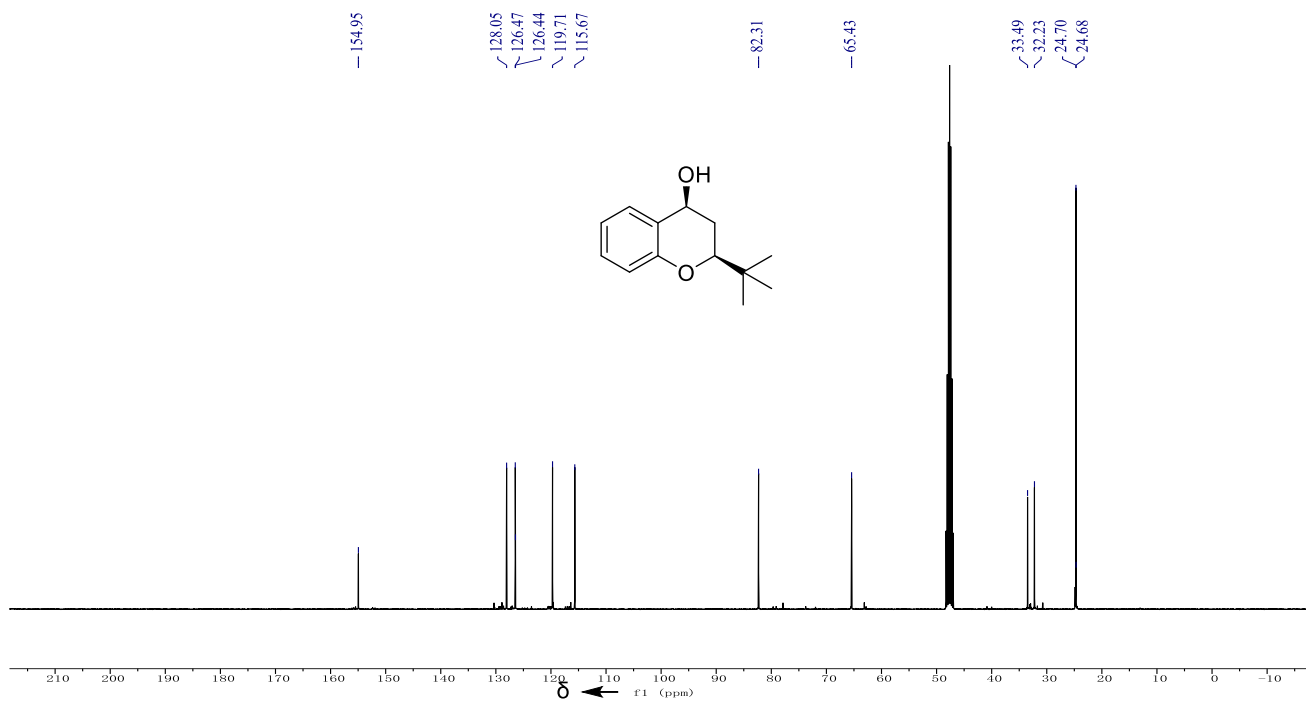



**(R,S)-7bg: (2R,4S)-6-chloro-2-methylchroman-4-ol**

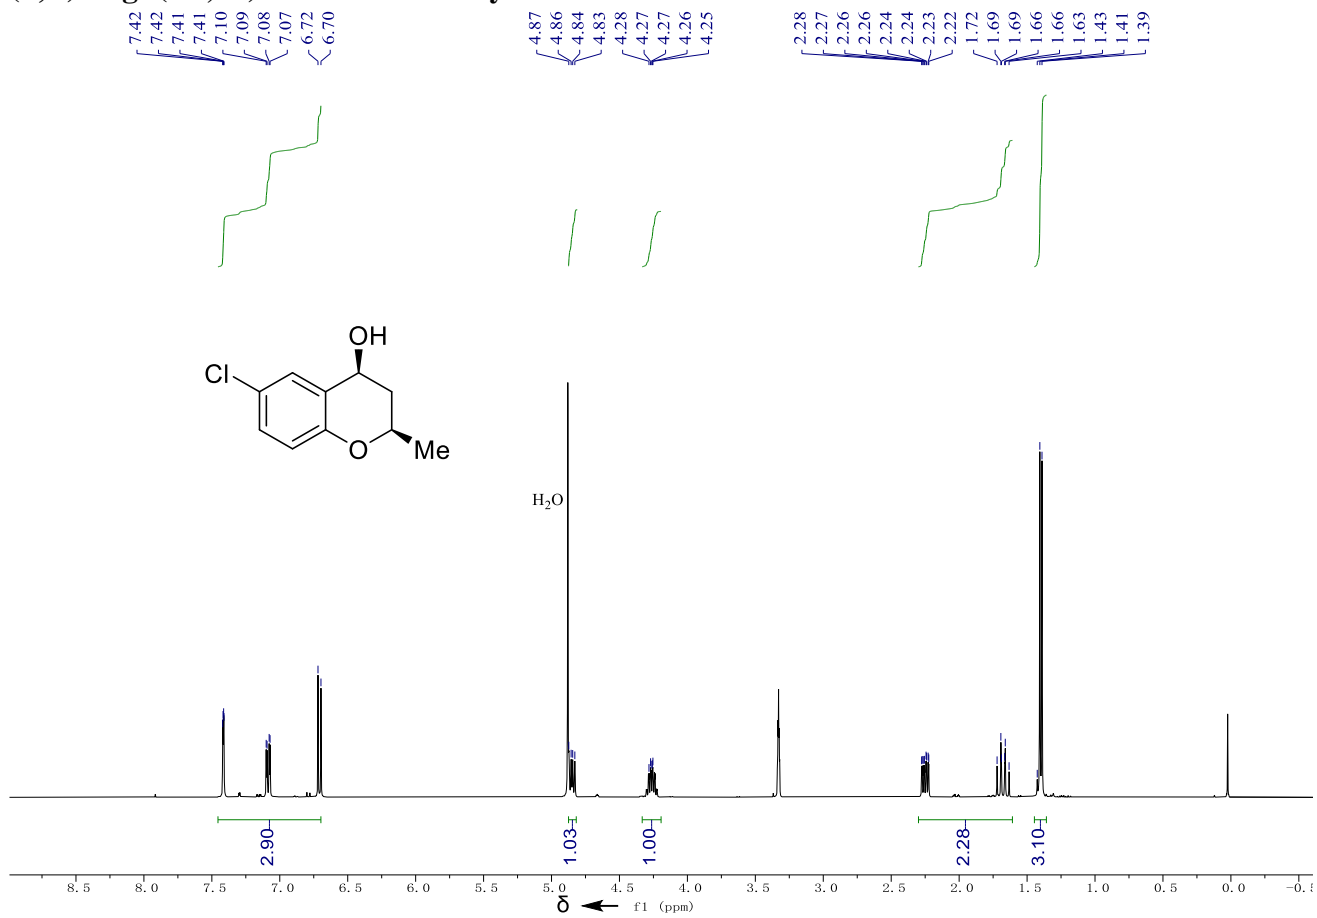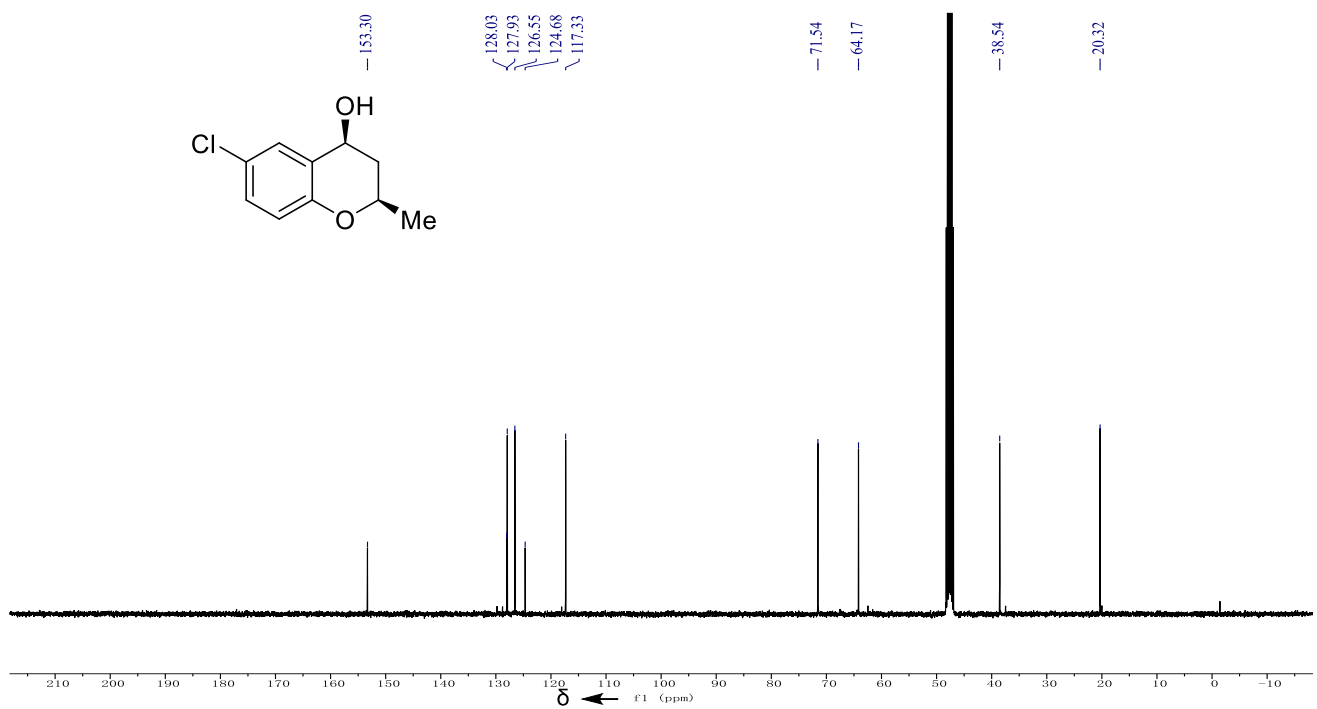

**(S,S)-4bh: (2S,4S)-6-chloro-2-isopropylchroman-4-ol.**

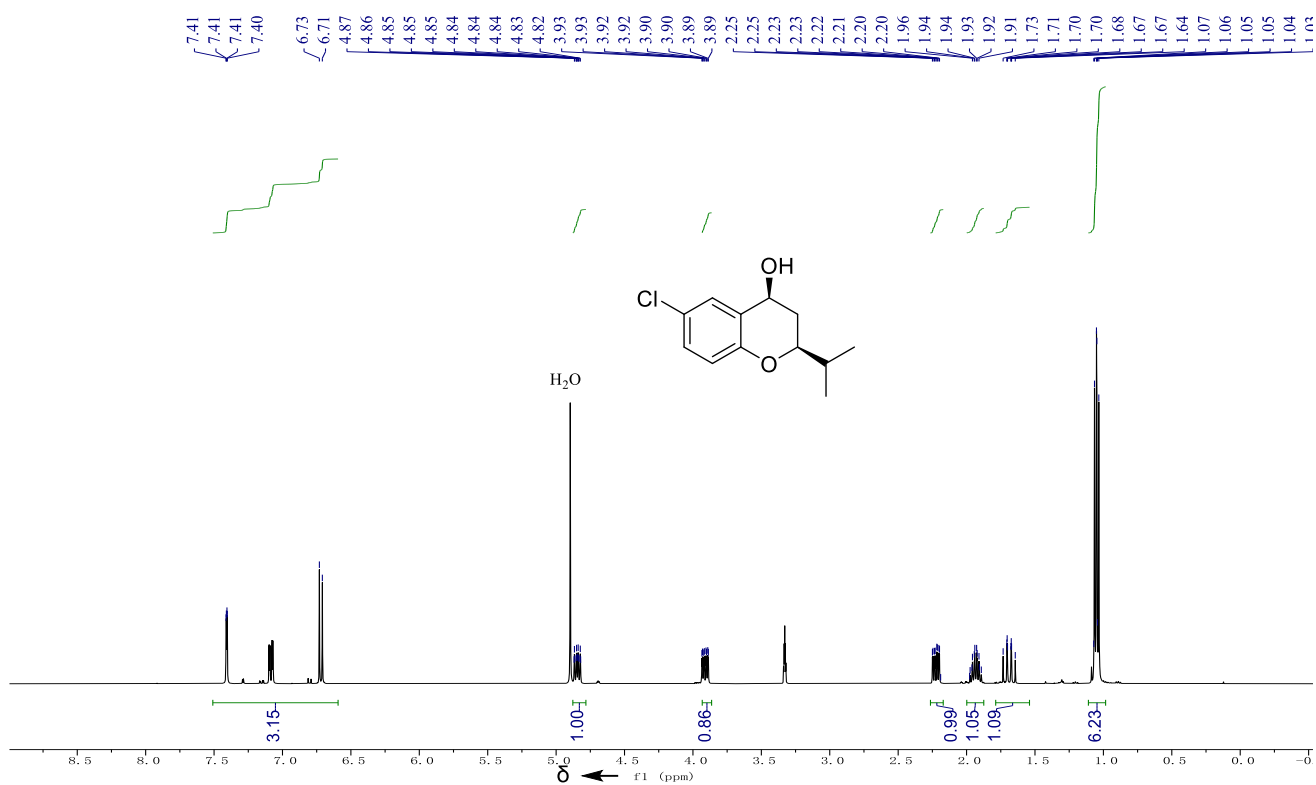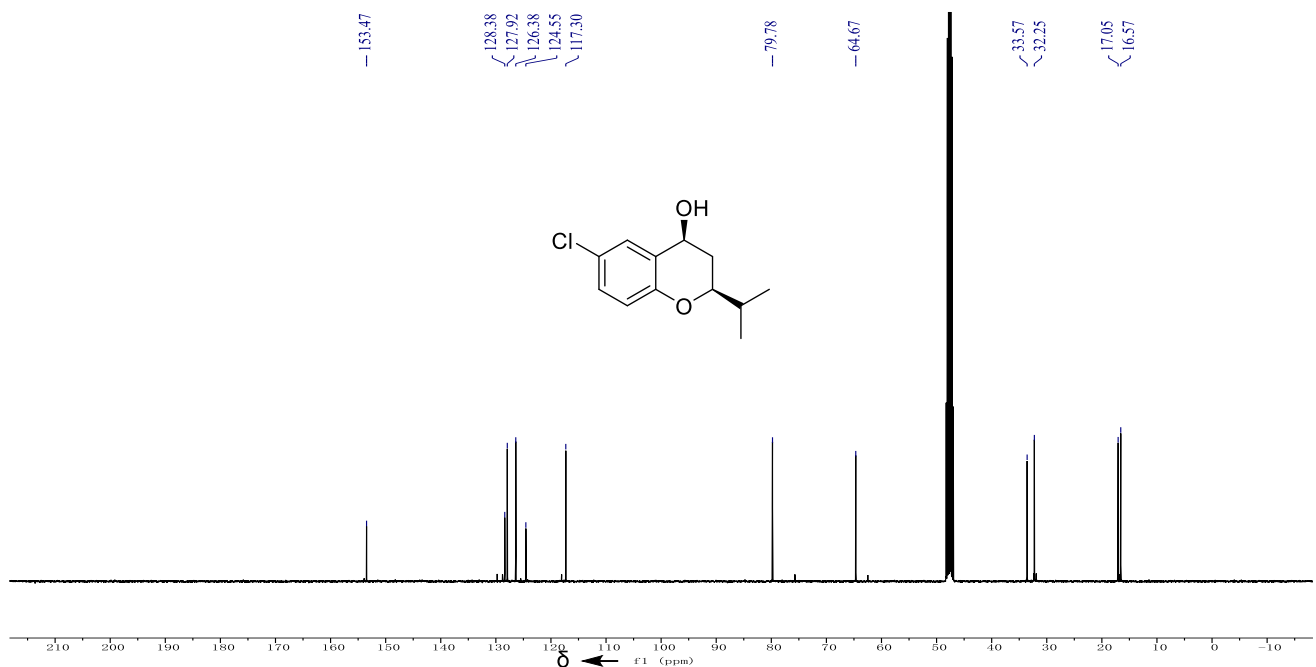

**(R,S)-7bi: (2R,4S)-6-chloro-2-isobutylchroman-4-ol**

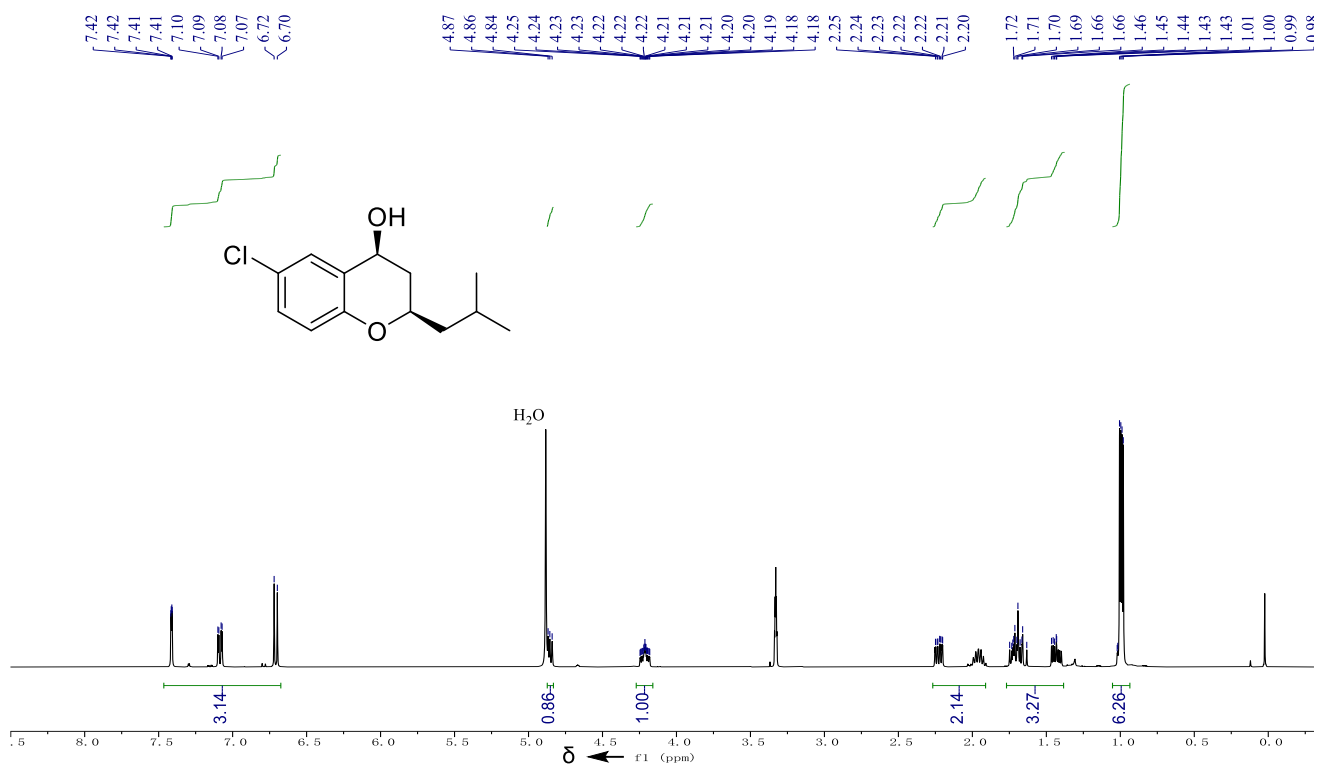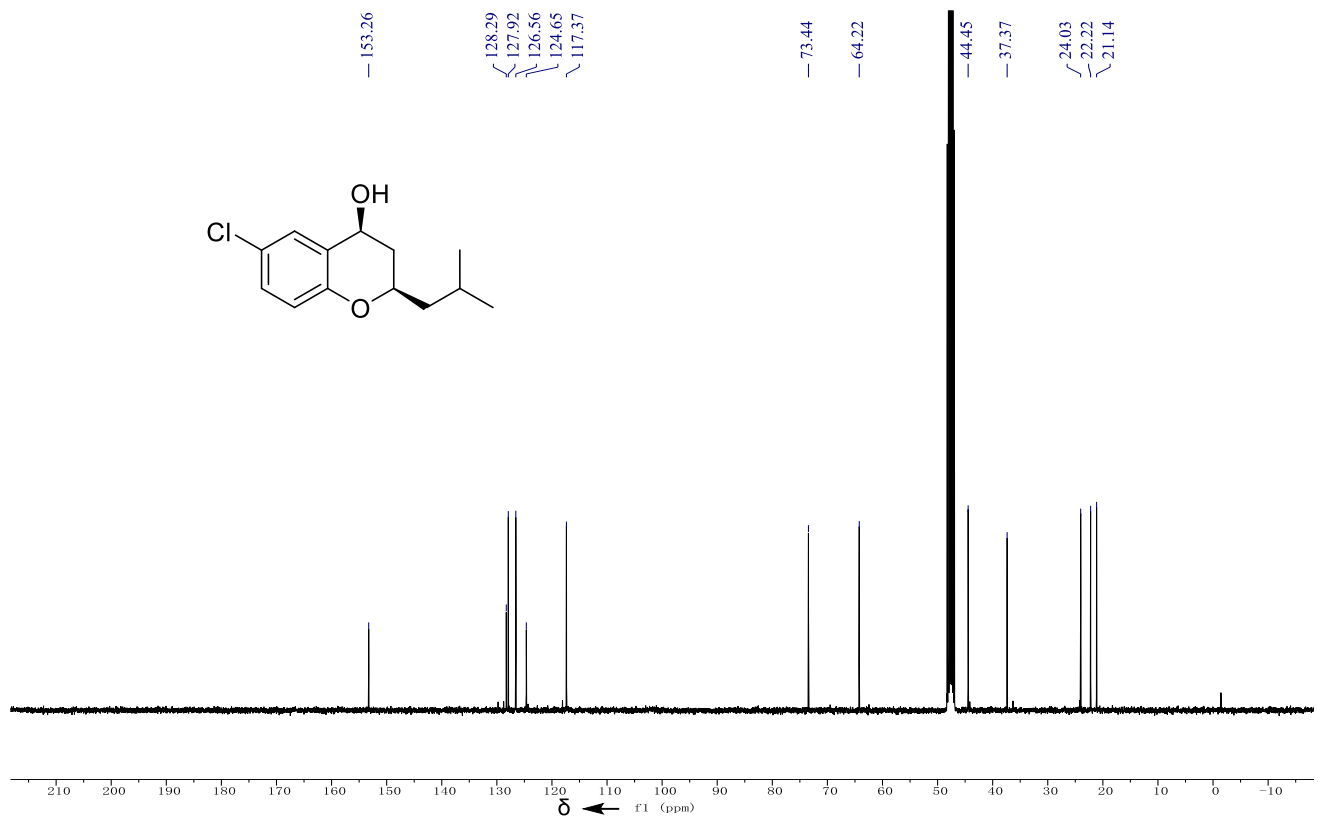

**(S,S)-7bj: (2S,4S)-2-(tert-butyl)-6-chlorochroman-4-ol**

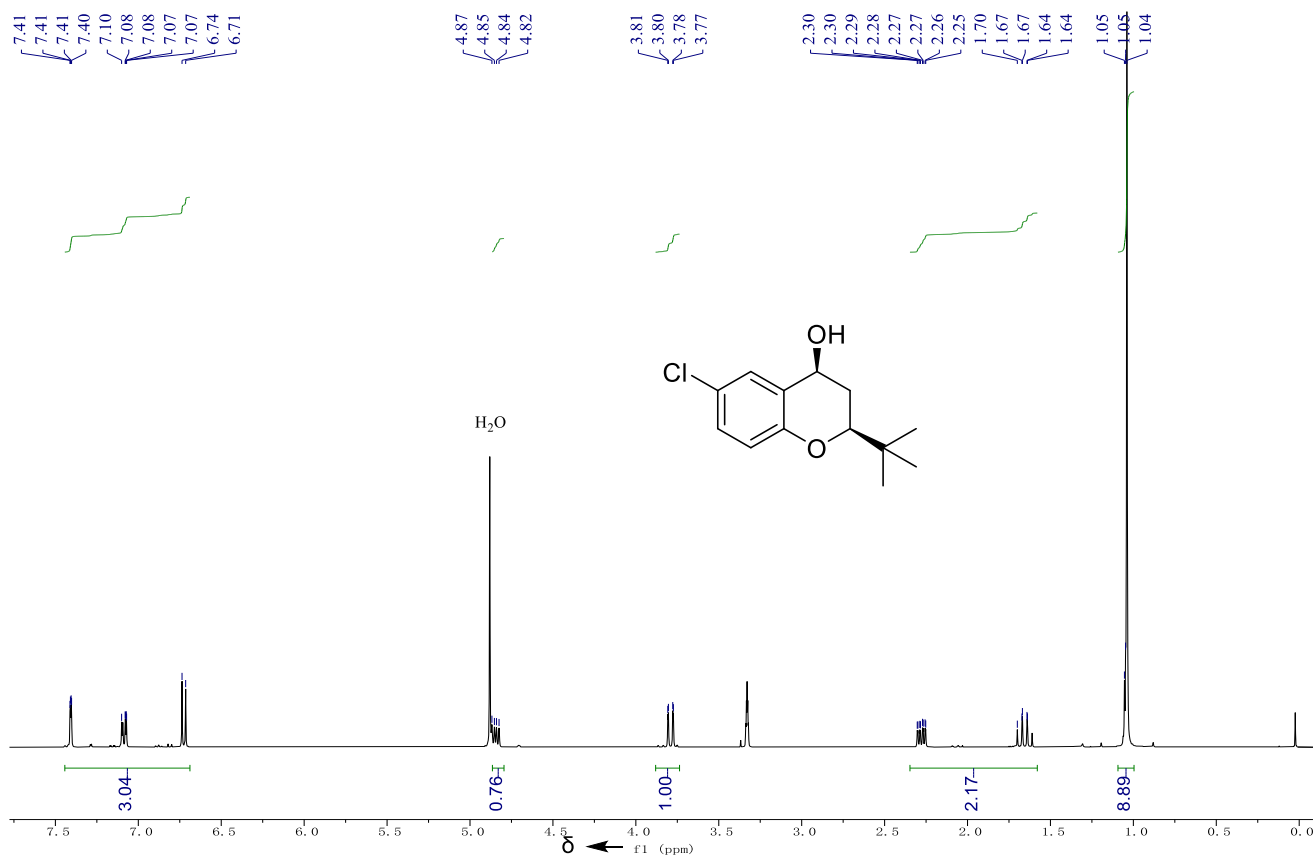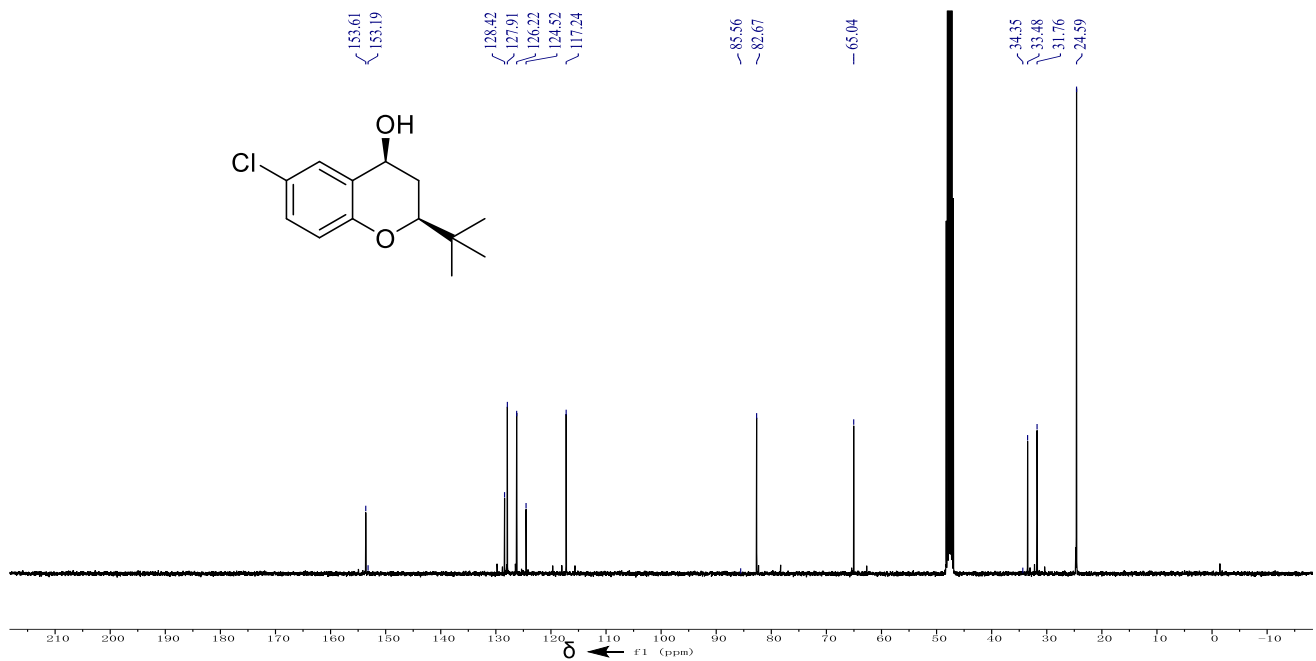

**(S,S)-7bk: (2S,4S)-6-bromo-2-isopropylchroman-4-ol.**

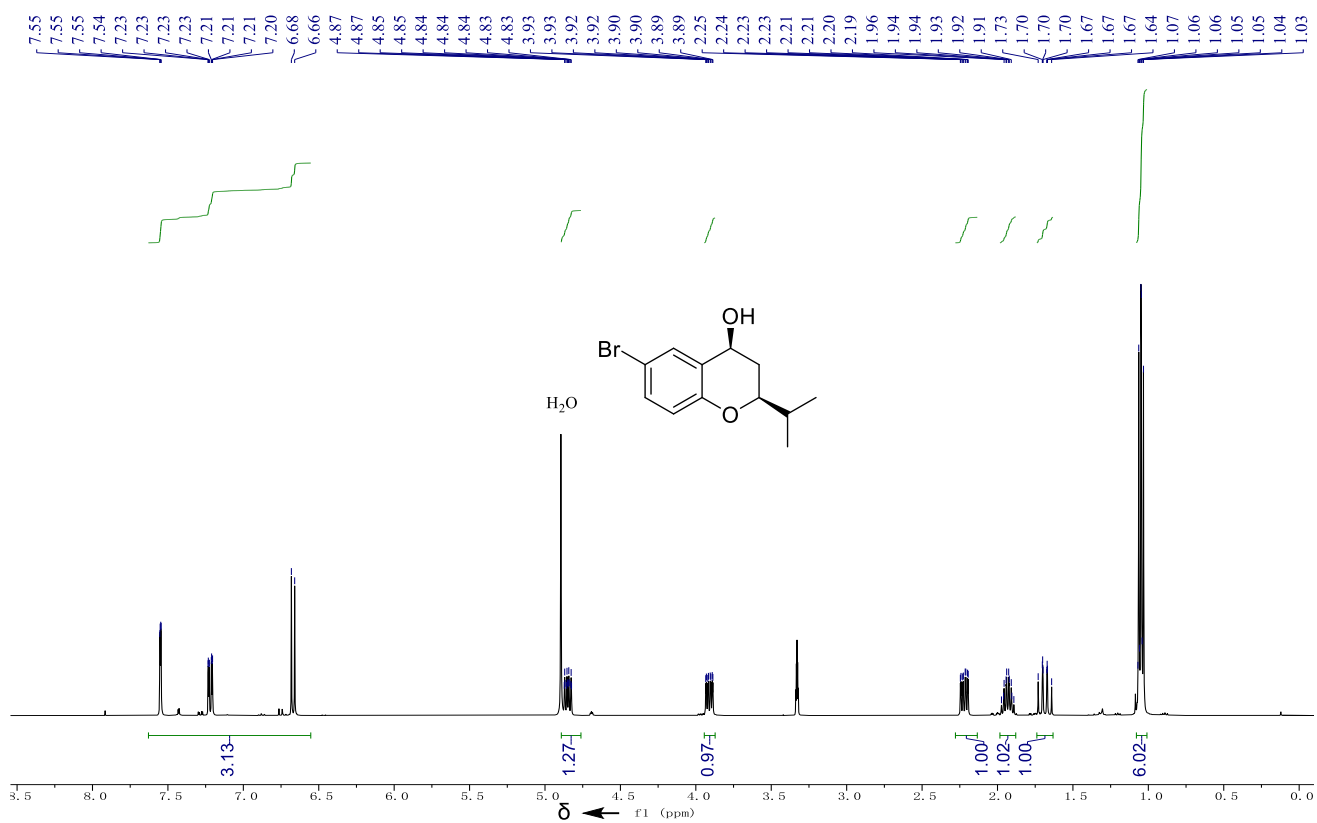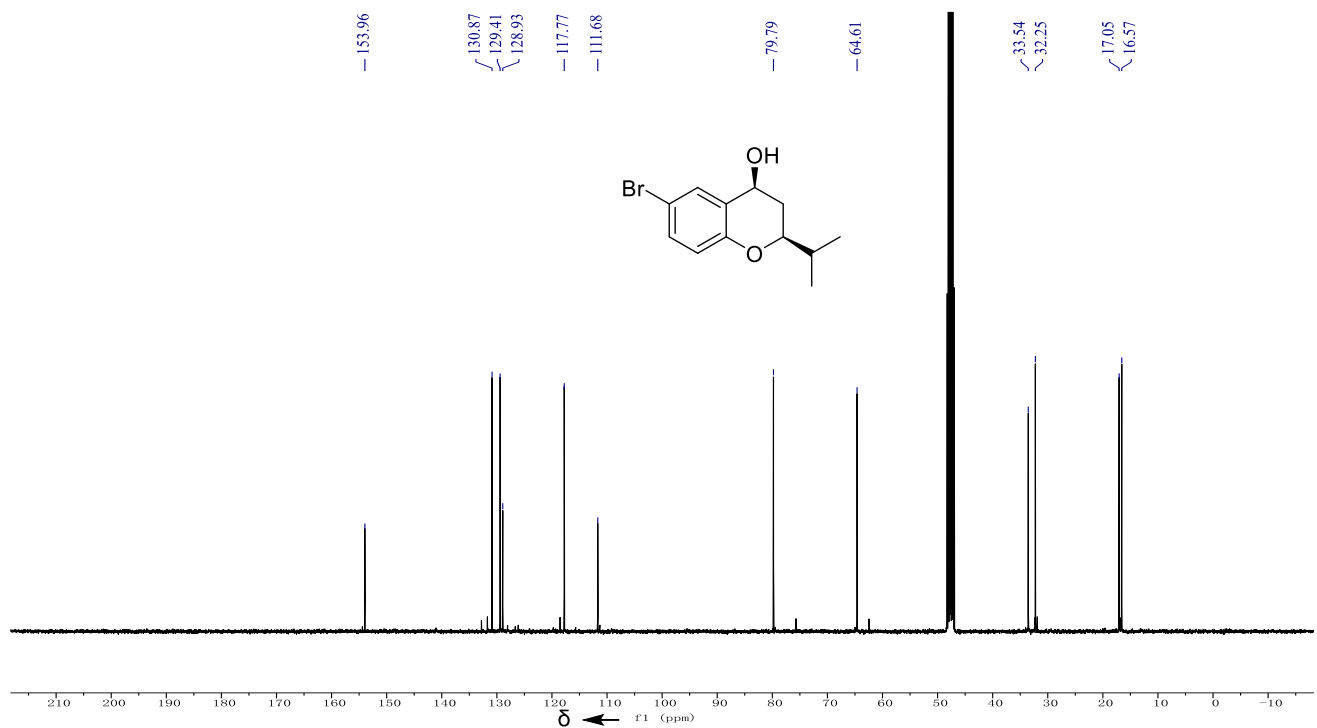

**(S,S)-7bl: (2S,4S)-2-cyclobutylchroman-4-ol.**

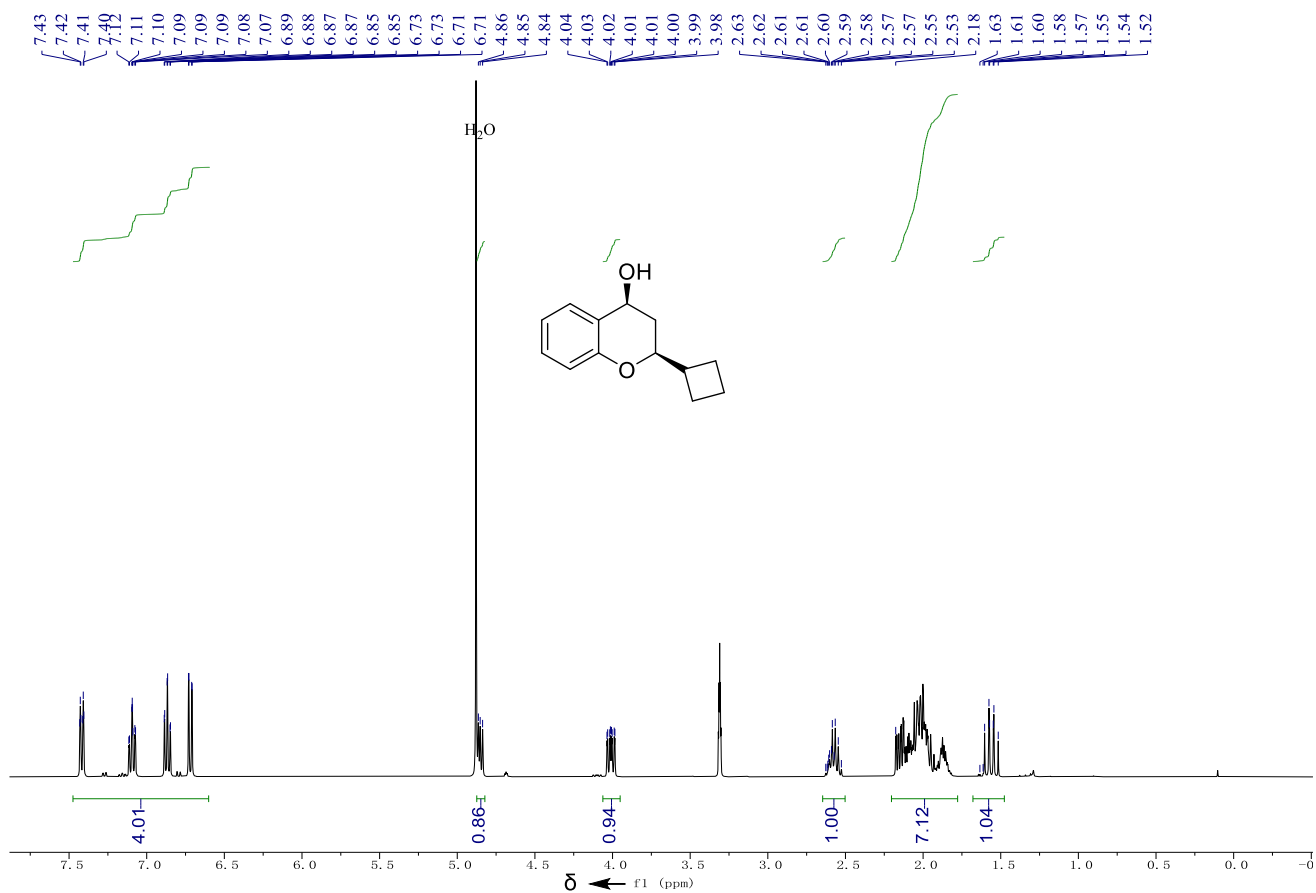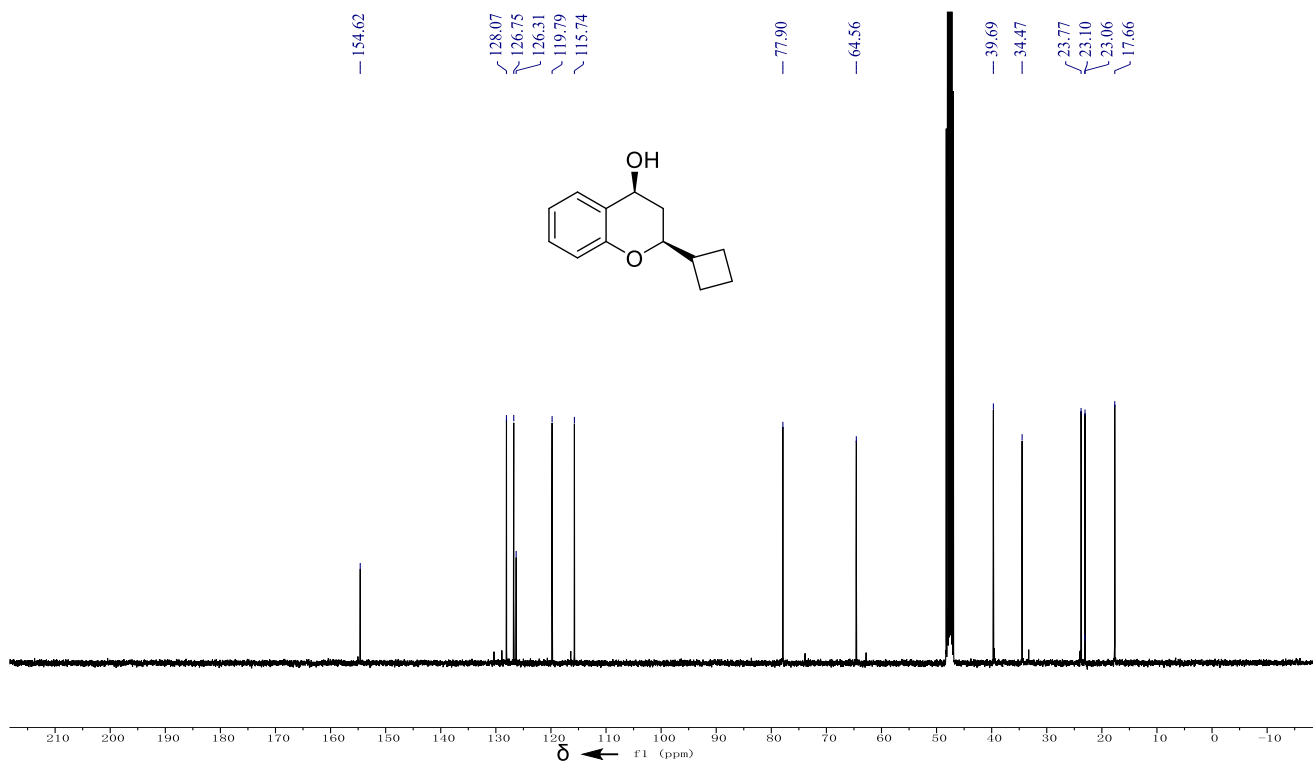

**(S,S)-7bm: (2S,4S)-2-cyclopentylchroman-4-ol.**

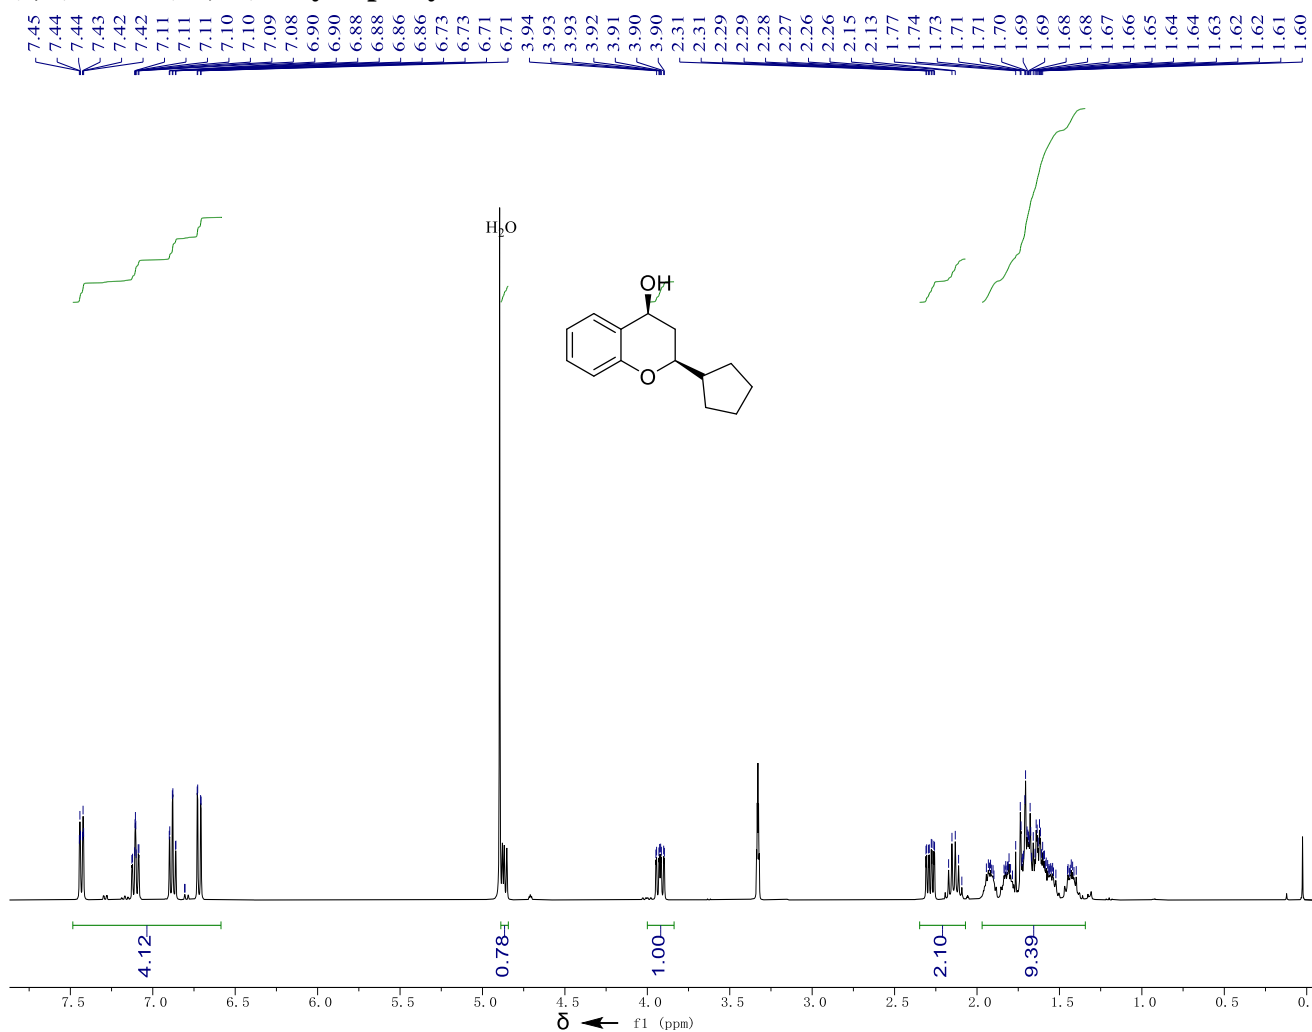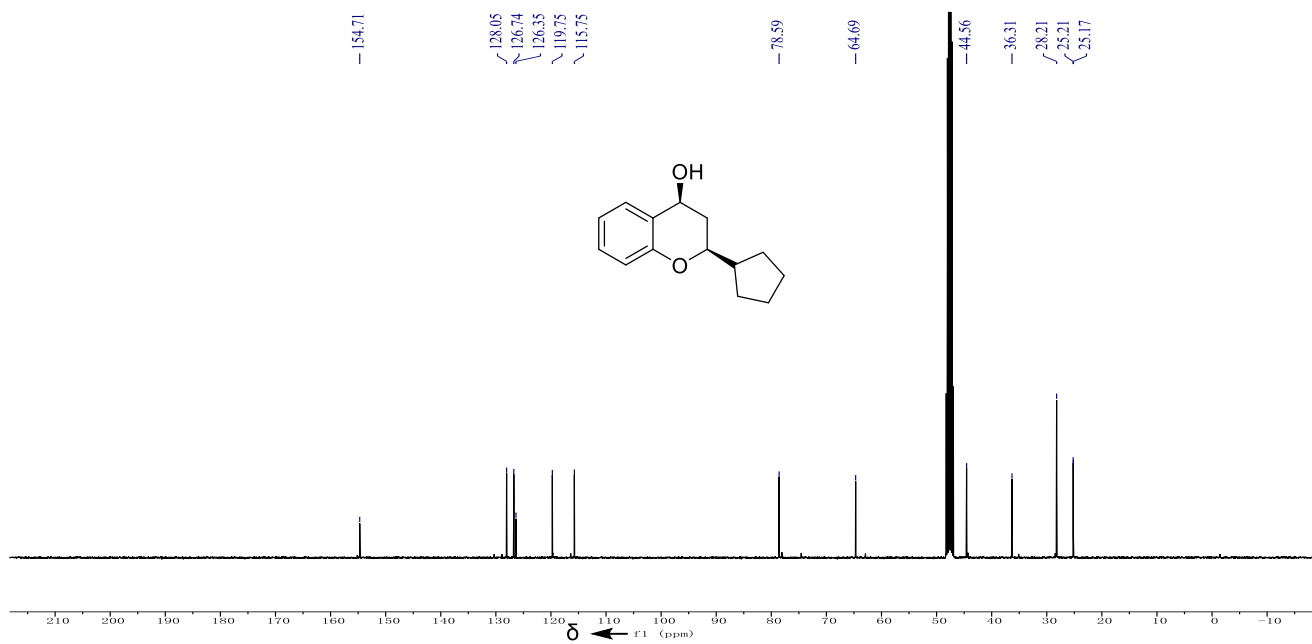

**(S,S)-7bn: (2S,4S)-2-cyclohexylchroman-4-ol.**

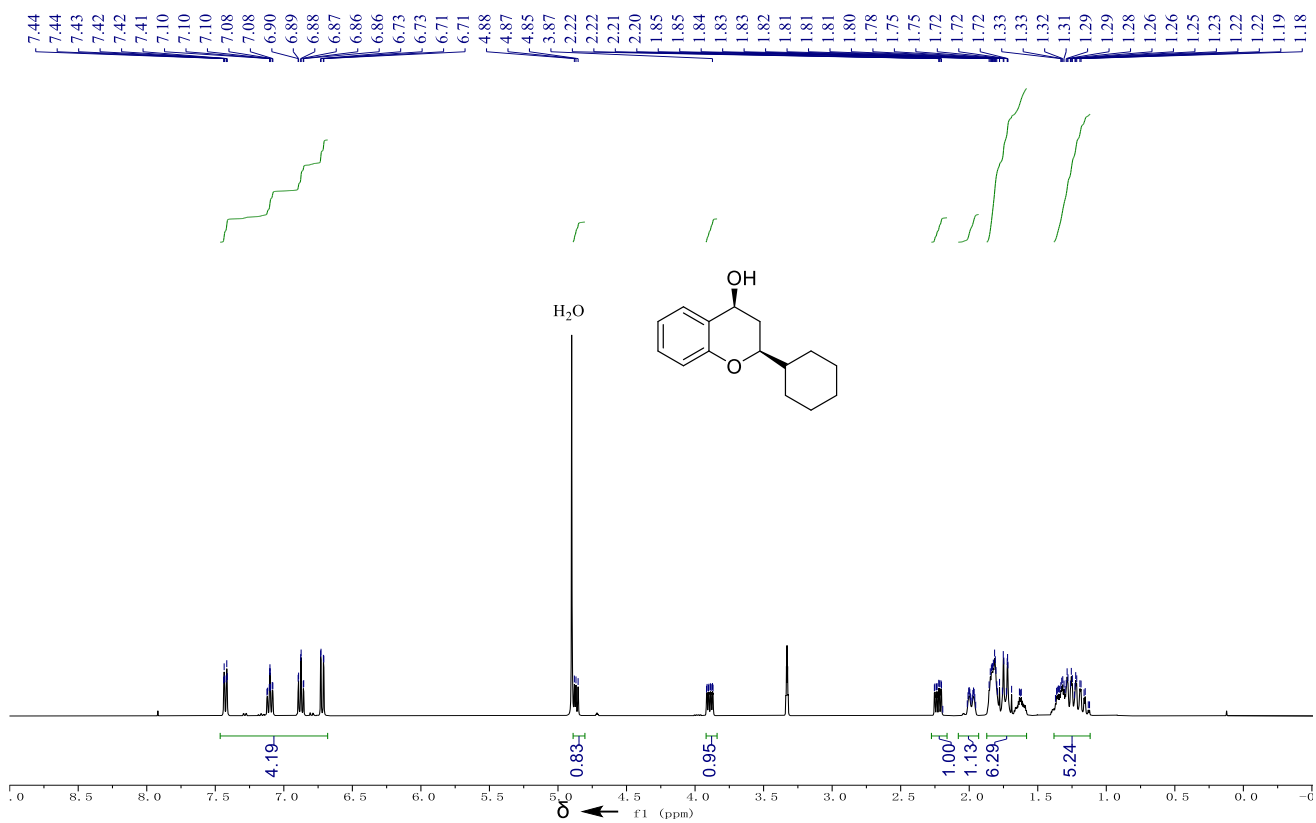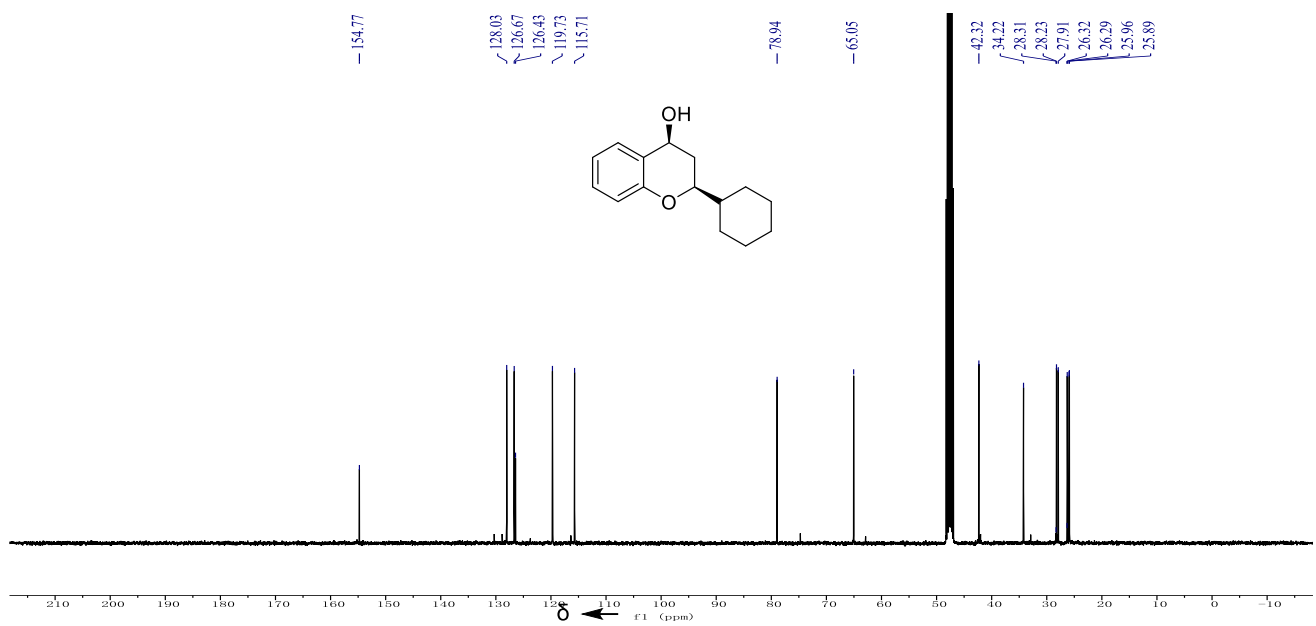



**(S,S)-7bo: tert-butyl 4-((2S,4S)-7-bromo-4-hydroxychroman-2-yl)piperidine-1-carboxylate.**

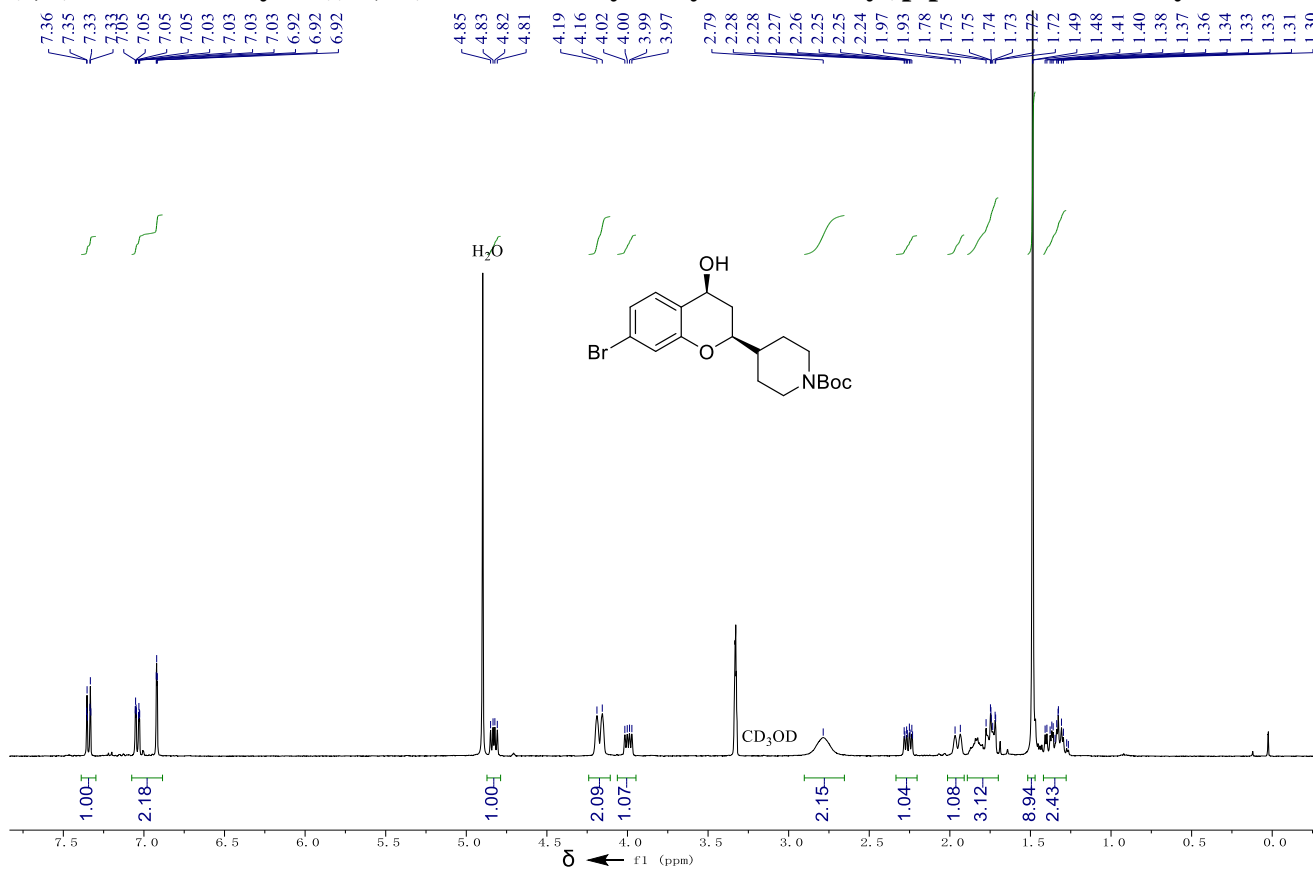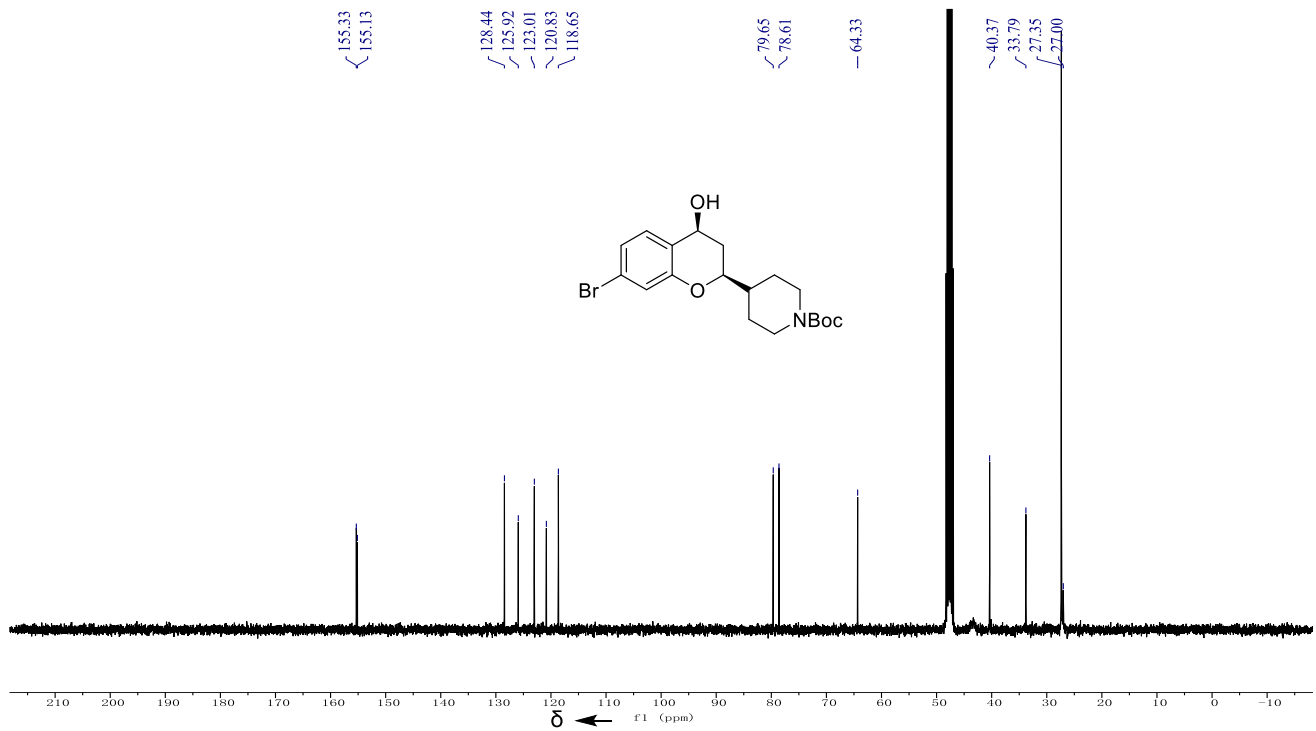

---

**Table S3.** The single-crystal structure data of (*S,S*)-**7ah**.

**Datablock: (2*S*,4*S*)-2-(*m*-tolyl)chroman-4-ol ((*S,S*)-**7ah**).**

---

|                        |                                             |                                    |
|------------------------|---------------------------------------------|------------------------------------|
| Bond precision:        | C-C = 0.0126 Å                              | Wavelength=0.71073                 |
| Cell:                  | a=11.9068(17)    b=4.8812(7)    c=22.718(4) |                                    |
|                        | alpha=90    beta=94.231(4)    gamma=90      |                                    |
| Temperature:           | 293 K                                       |                                    |
|                        | Calculated                                  | Reported                           |
| Volume                 | 1316.8(4)                                   | 1316.8(3)                          |
| Space group            | P 21                                        | P 21                               |
| Hall group             | P 2yb                                       | P 2yb                              |
| Moiety formula         | C16 H16 O2                                  | ?                                  |
| Sum formula            | C16 H16 O2                                  | C16 H16 O2                         |
| Mr                     | 240.29                                      | 240.29                             |
| Dx, g cm <sup>-3</sup> | 1.212                                       | 1.212                              |
| Z                      | 4                                           | 4                                  |
| Mu (mm <sup>-1</sup> ) | 0.079                                       | 0.079                              |
| F000                   | 512.0                                       | 512.0                              |
| F000'                  | 512.24                                      |                                    |
| h, k, lmax             | 14, 5, 27                                   | 14, 5, 27                          |
| Nref                   | 4639 [ 2619]                                | 4440                               |
| Tmin, Tmax             | 0.993, 0.996                                | 0.550, 0.746                       |
| Tmin'                  | 0.985                                       |                                    |
| Correction method=     | # Reported T Limits: Tmin=0.550 Tmax=0.746  |                                    |
| AbsCorr =              | MULTI-SCAN                                  |                                    |
| Data completeness=     | 1.70/0.96    Theta(max)= 24.998             |                                    |
| R(reflections)=        | 0.0702( 2296)                               | wR2(reflections)=<br>0.2035( 4440) |
| S =                    | 1.041    Npar= 340                          |                                    |

---

**Table S4.** Reusability of catalyst (for the Aldol condensation /oxa-addition/reduction cascade of **4aa** and **5aa**).

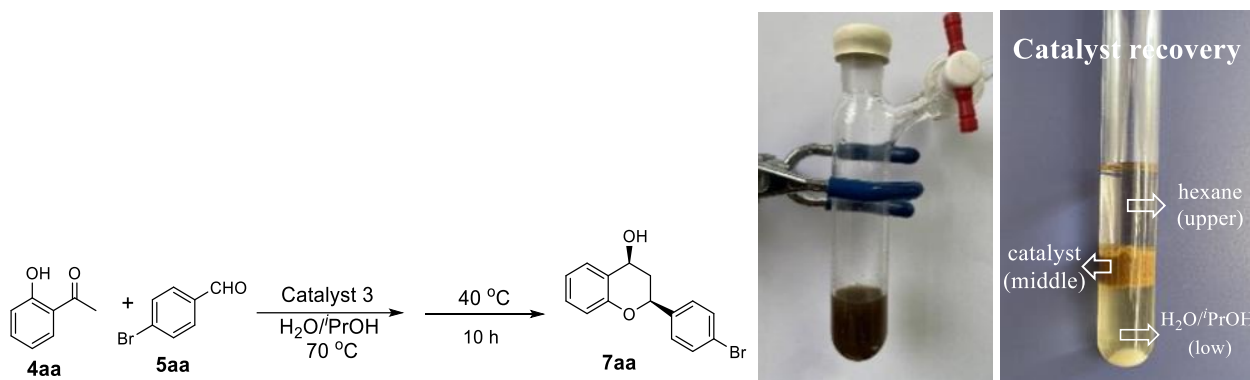

| Entry       | 1  | 2  | 3  | 4  | 5  | 6  |
|-------------|----|----|----|----|----|----|
| % Yield     | 75 | 74 | 72 | 71 | 70 | 69 |
| % <i>ee</i> | 99 | 99 | 99 | 99 | 99 | 99 |
| <i>dr</i>   | 28 | 25 | 25 | 20 | 20 | 17 |

Reaction conditions: Catalyst **3** (0.12 mmol of DBU salt-loadings and 2.50 mol% of Ru-loadings based on ICP analyses), 1.0 equivalent of **4aa**, 1.20 equivalent of **5aa**, and 10.0 equivalent of  $\text{HCOONa}$  in 4.0 mL of  $\text{H}_2\text{O}/\text{PrOH}$  ( $v/v = 1:3$ ), and the mixture stirred at  $70\text{ }^\circ\text{C}$  for the first 12 h followed at  $40\text{ }^\circ\text{C}$  for 10 h. Yields were determined by  $^1\text{H-NMR}$  analysis, and *ee* and *dr* values were determined by chiral HPLC analysis.

**Figure S8.** Reusability of catalyst **3** in the Aldol condensation /oxa-addition/reduction cascade process of **4aa** and **5aa** (The error bars represent the standard deviation).

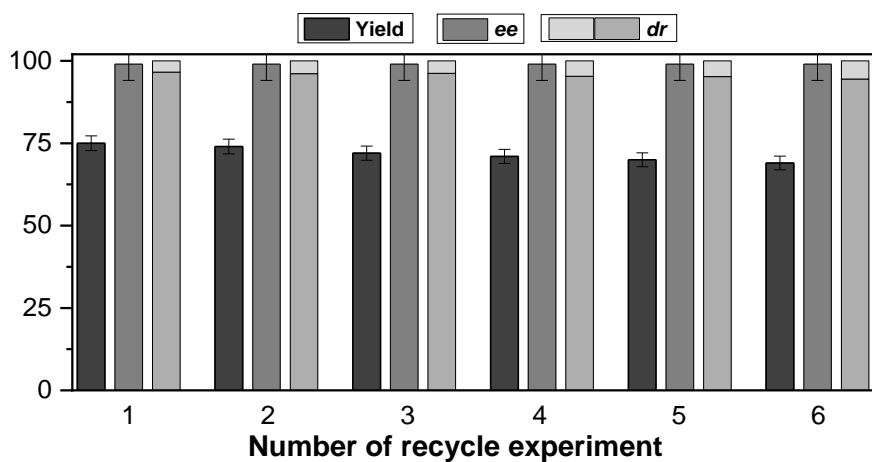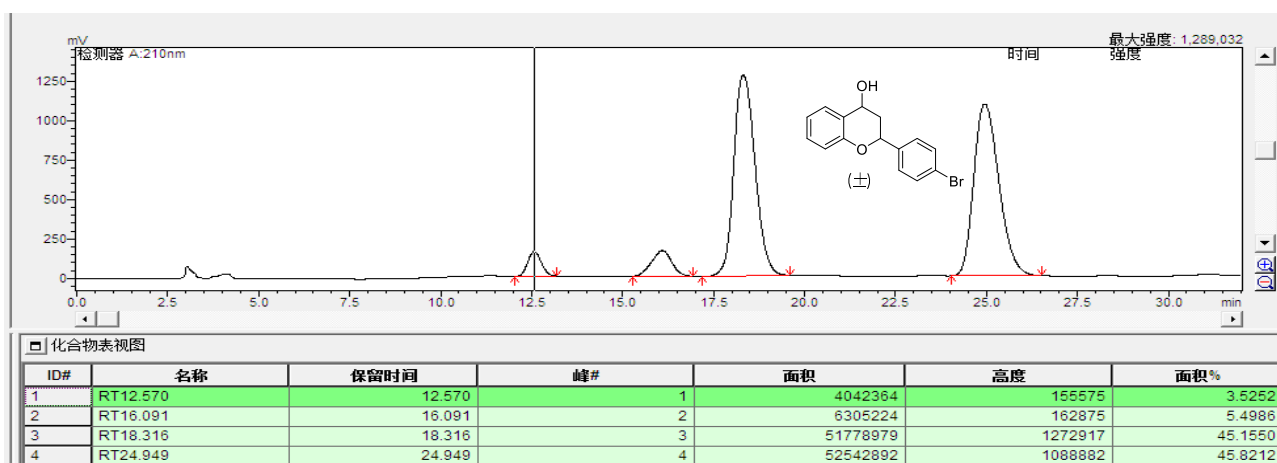

Recycle 1.

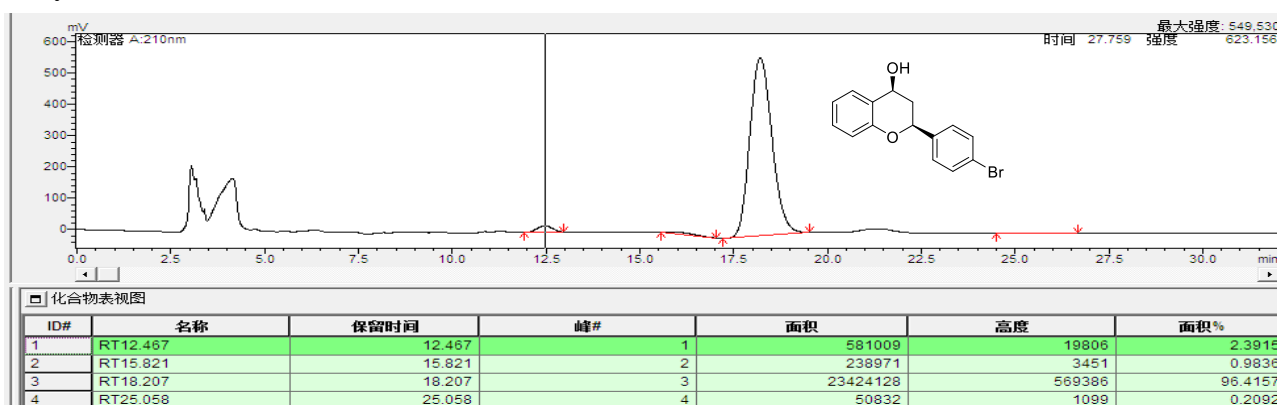

### Recycle 2.

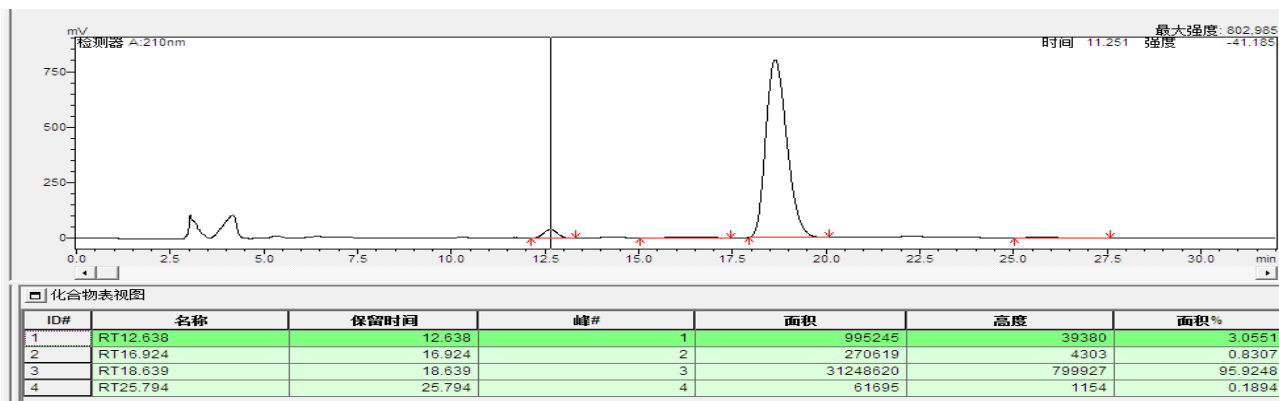

### Recycle 3.

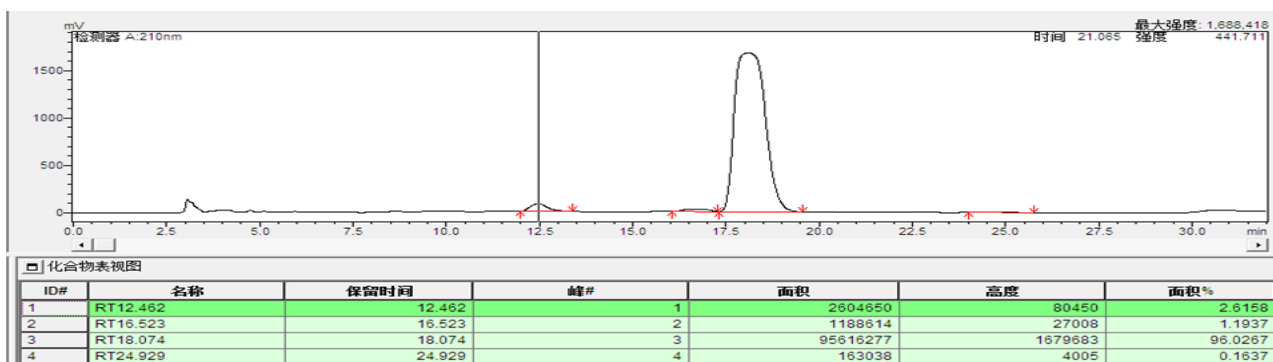

### Recycle 4.

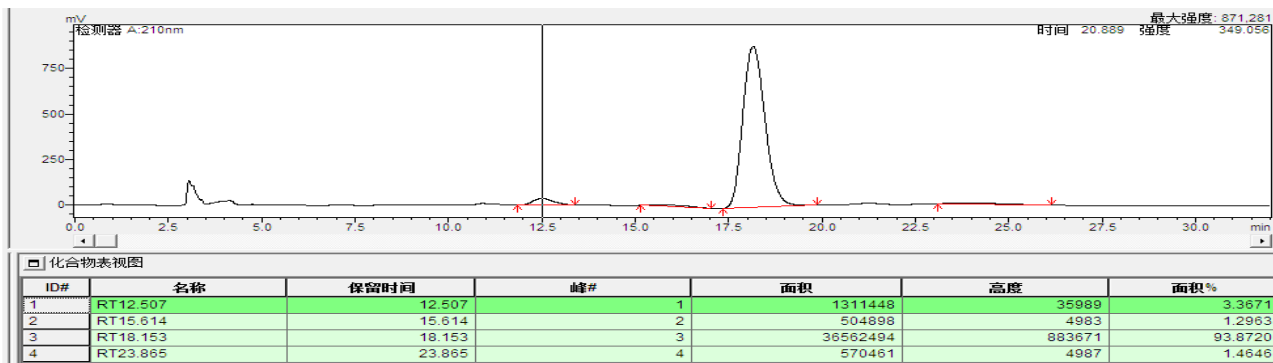

**Translation of all characters (Chinese) in the above all frameworks to English is as follows:**

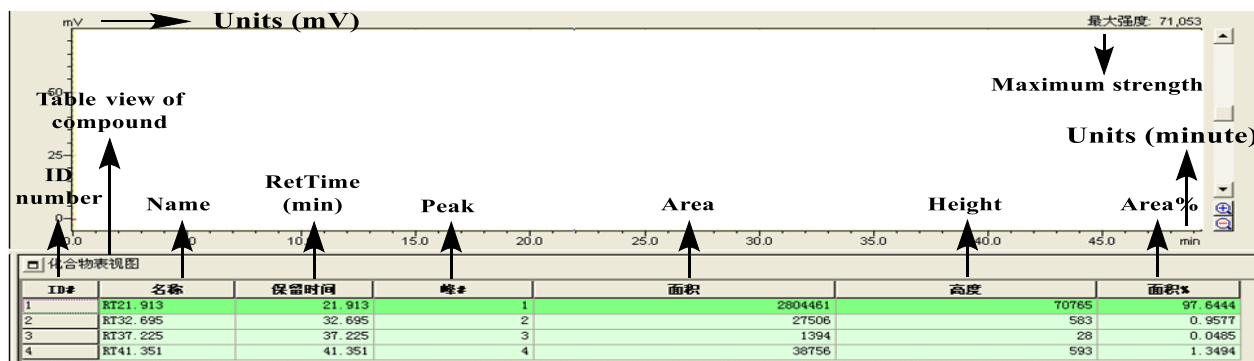

Recycle 5.

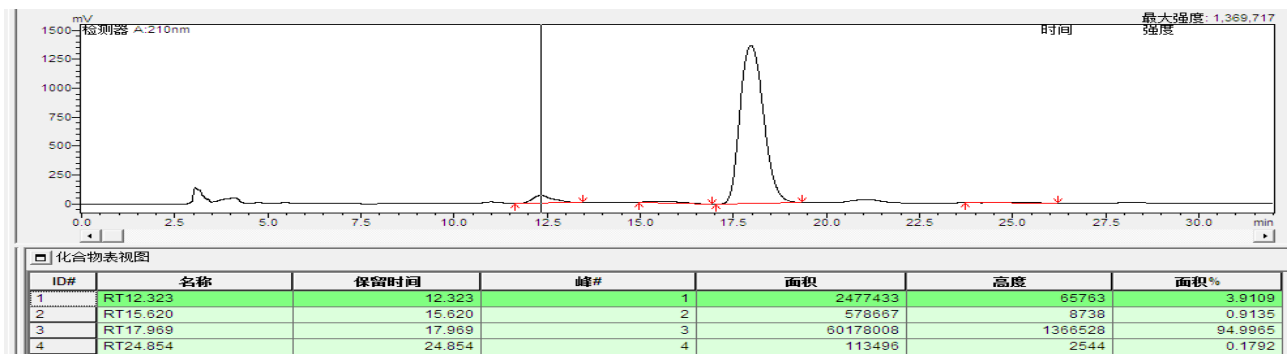

Recycle 6.

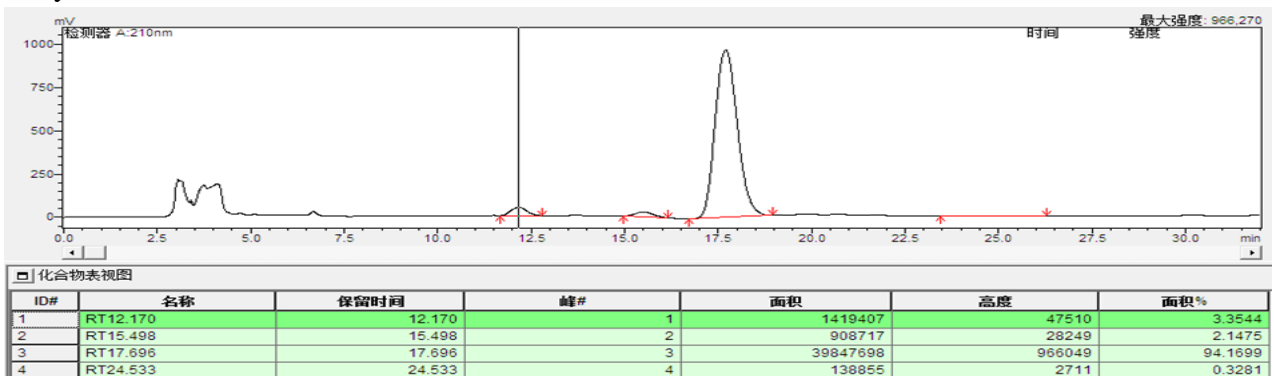

**Translation of all characters (Chinese) in the above two frameworks to English is as follows:**

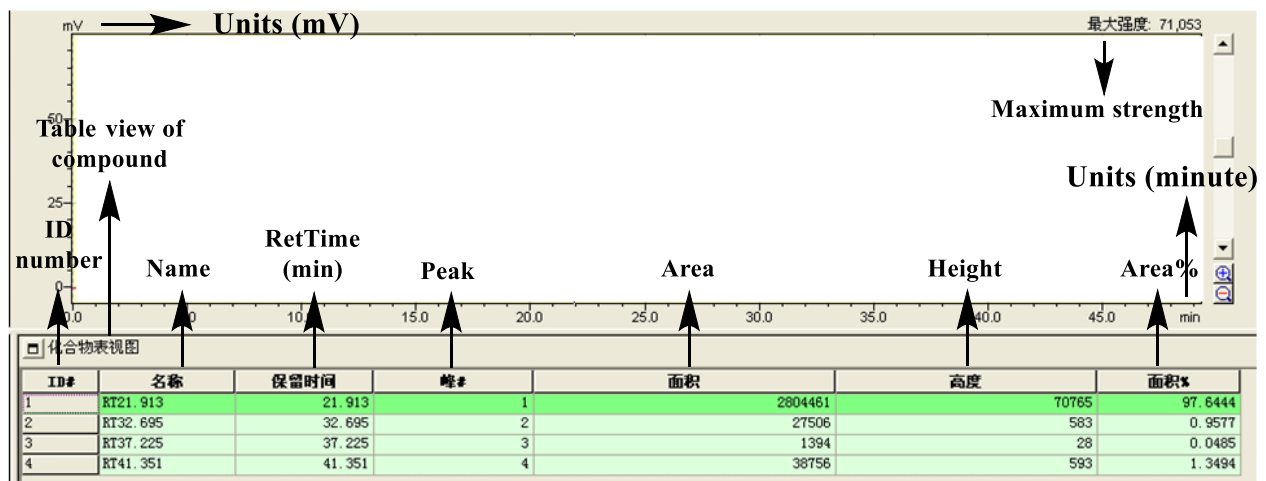

**Figure S9.** Contrastive  $^1\text{H-NMR}$  spectra for deuterium labeling experiments.

(a) The standard  $^1\text{H-NMR}$  spectrum of **6aa** in the normal reaction of **4aa** and **5aa**.

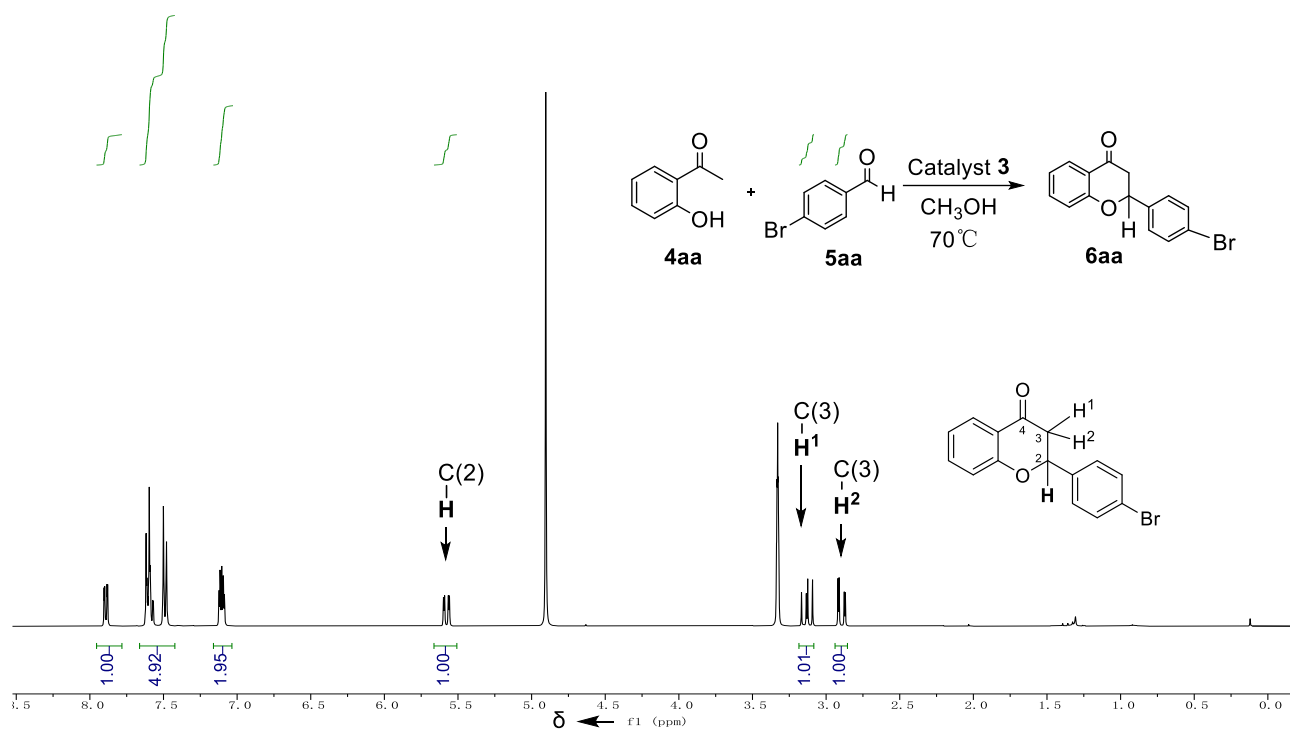

(b) The  $^1\text{H-NMR}$  spectrum of **6aa- $d_1$**  in the deuterium labeling reaction of **4aa** and **5aa- $d_1$**  in  $\text{H}_2\text{O}/\text{CH}_3\text{OH}$ .

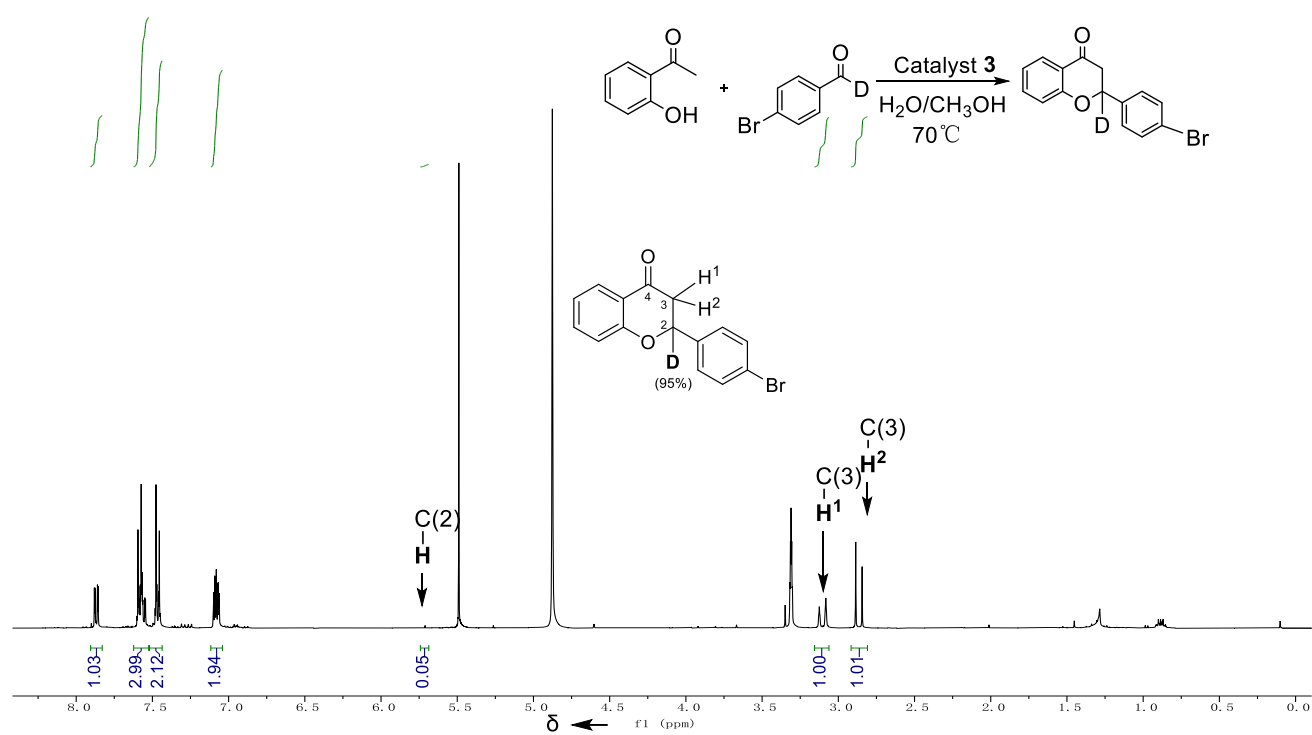

(c) The  $^1\text{H-NMR}$  spectrum of **6aa-d<sub>3</sub>** in the deuterium labeling reaction of **4aa** and **5aa-d<sub>1</sub>** reaction in deuterated  $\text{D}_2\text{O}/\text{CD}_3\text{OD}$ .

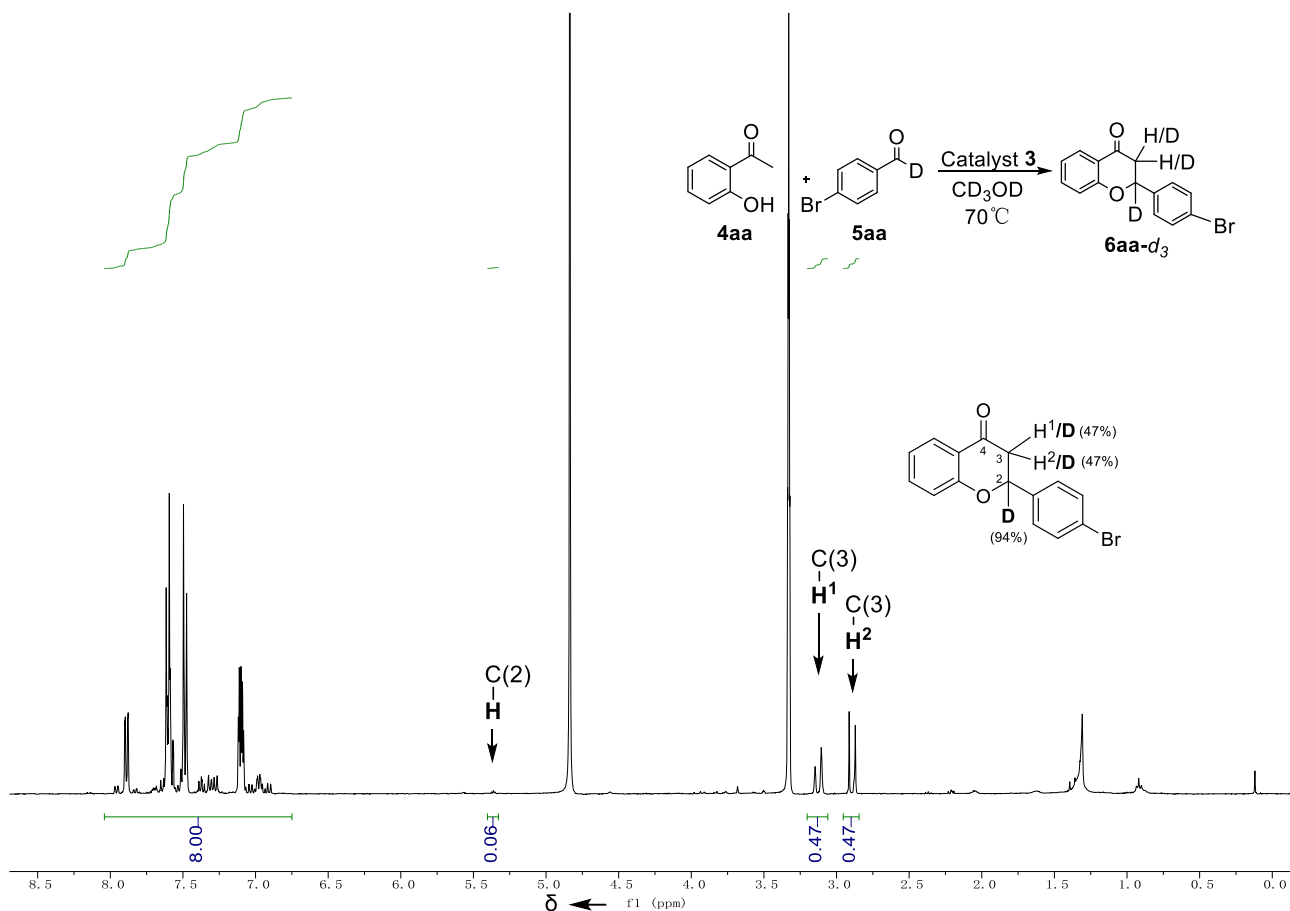

**Explanation:** Through the comparison of the above three  $^1\text{H-NMR}$  spectra, it easily arrives at a conclusion below. The Aldol condensation of **4aa** and **5aa** generates deuterated chalcone. The intramolecular conjugate addition (oxa-Michael cyclization) affords **6aa-d<sub>3</sub>** with equal attacks from both *syn*-face and *anti*-face of the double bond, leading to the same deuterium ratio that is possibly abstracted by  $\text{D}^+$  from  $\text{D}_2\text{O}$ .

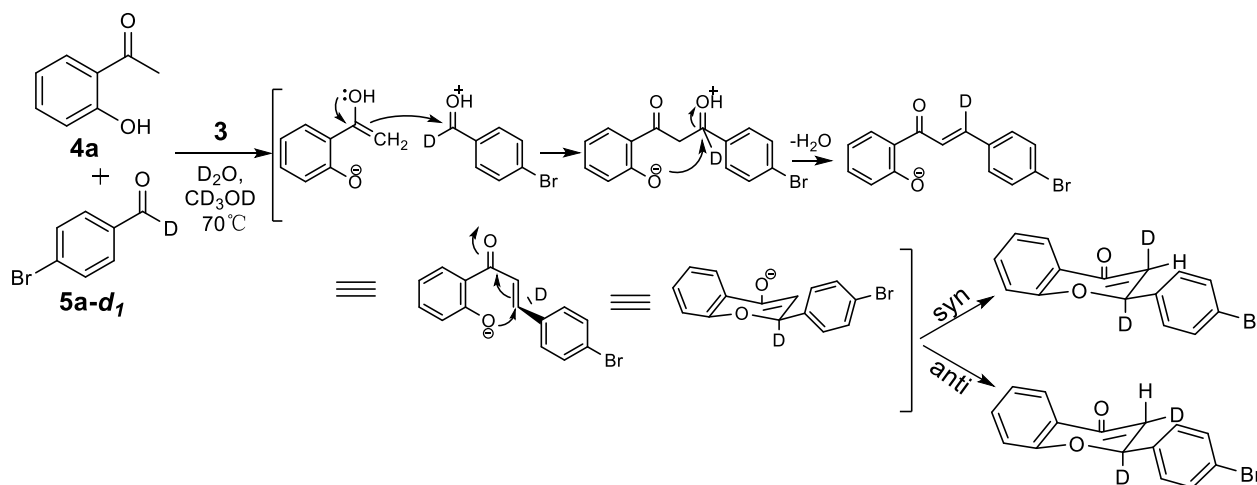



(d) The standard  $^1\text{H-NMR}$  spectrum of (*S,S*)-**7aa**.

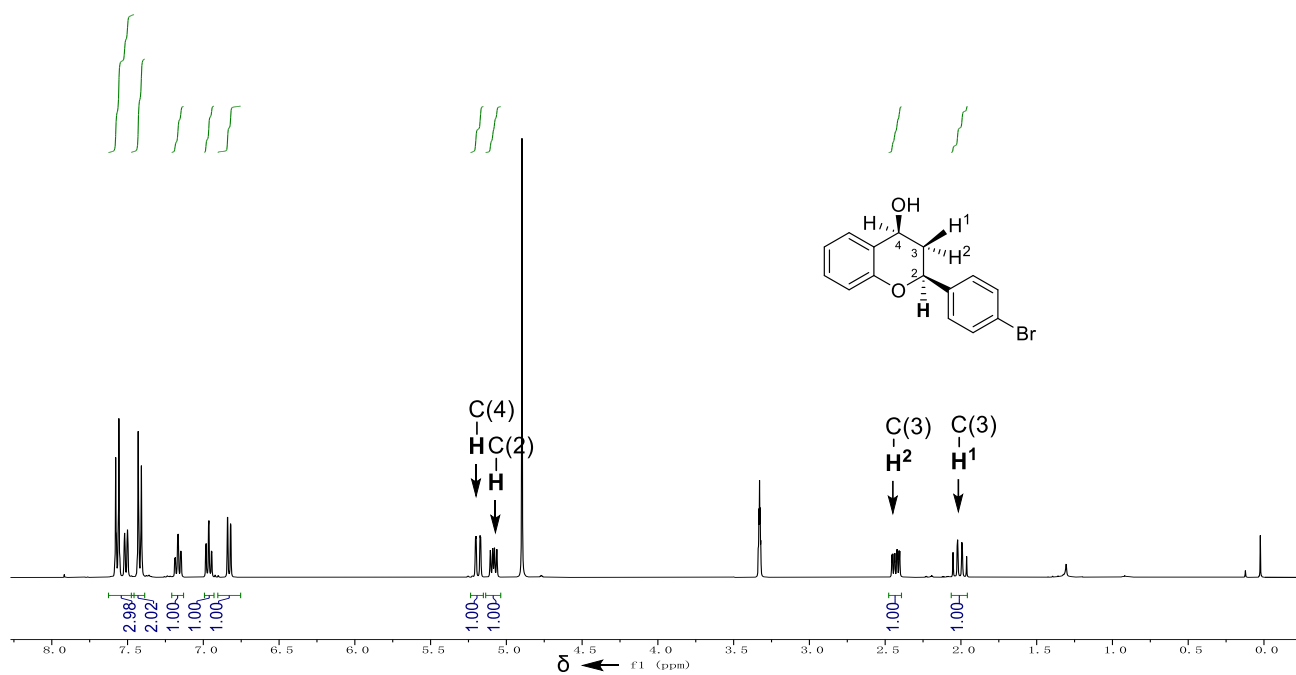

(e) The  $^1\text{H-NMR}$  spectrum of **7aa-d<sub>3</sub>** in the reaction of **6aa** in deuterated  $\text{D}_2\text{O}/\text{CD}_3\text{OD}$ .

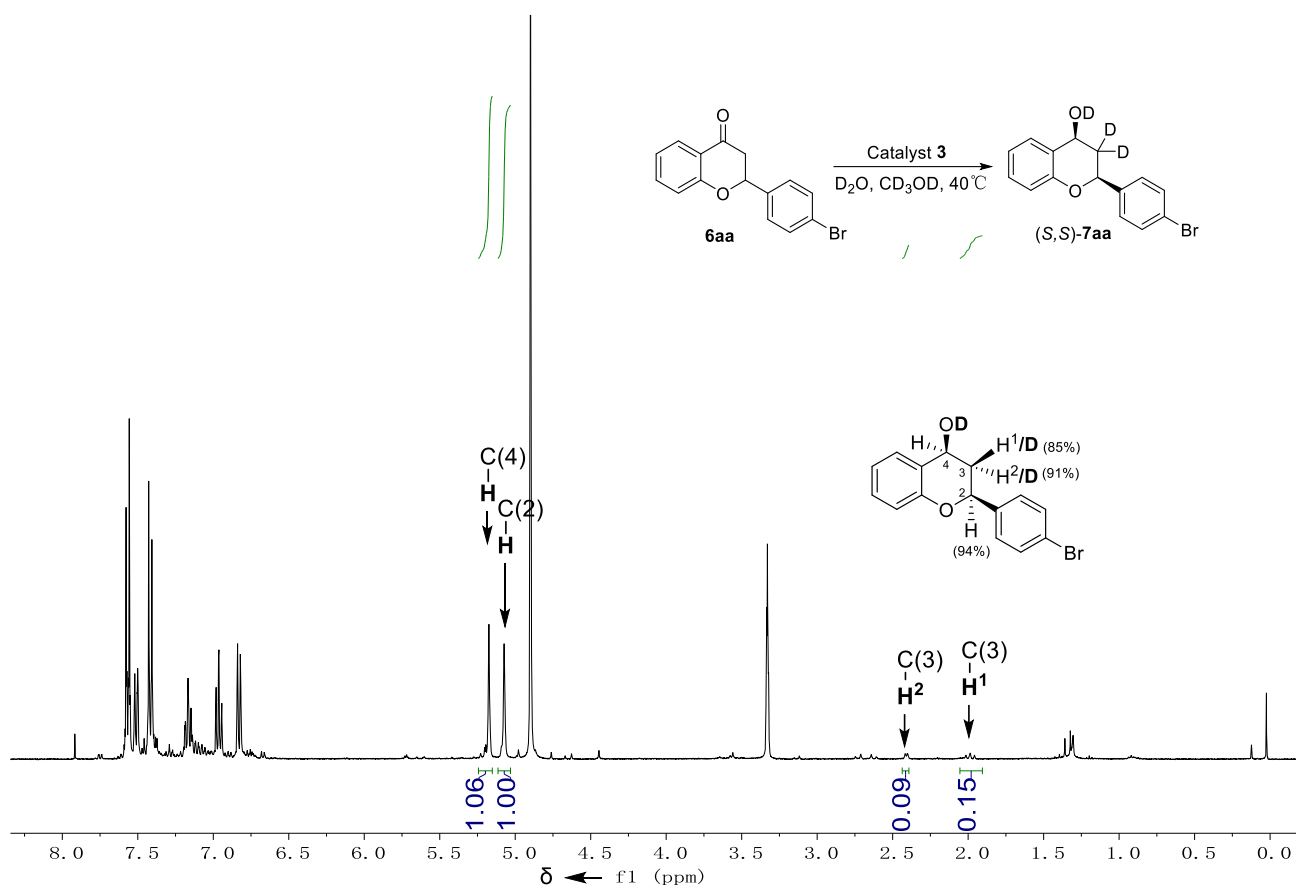

(f) The  $^1\text{H-NMR}$  spectrum of **7aa-d<sub>4</sub>** in the deuterium labeling reaction (control reaction) of **6aa-d<sub>3</sub>** with homogeneous MesRuTsDPEN as a catalyst in the deuterated  $\text{D}_2\text{O}/\text{CD}_3\text{OD}$ .

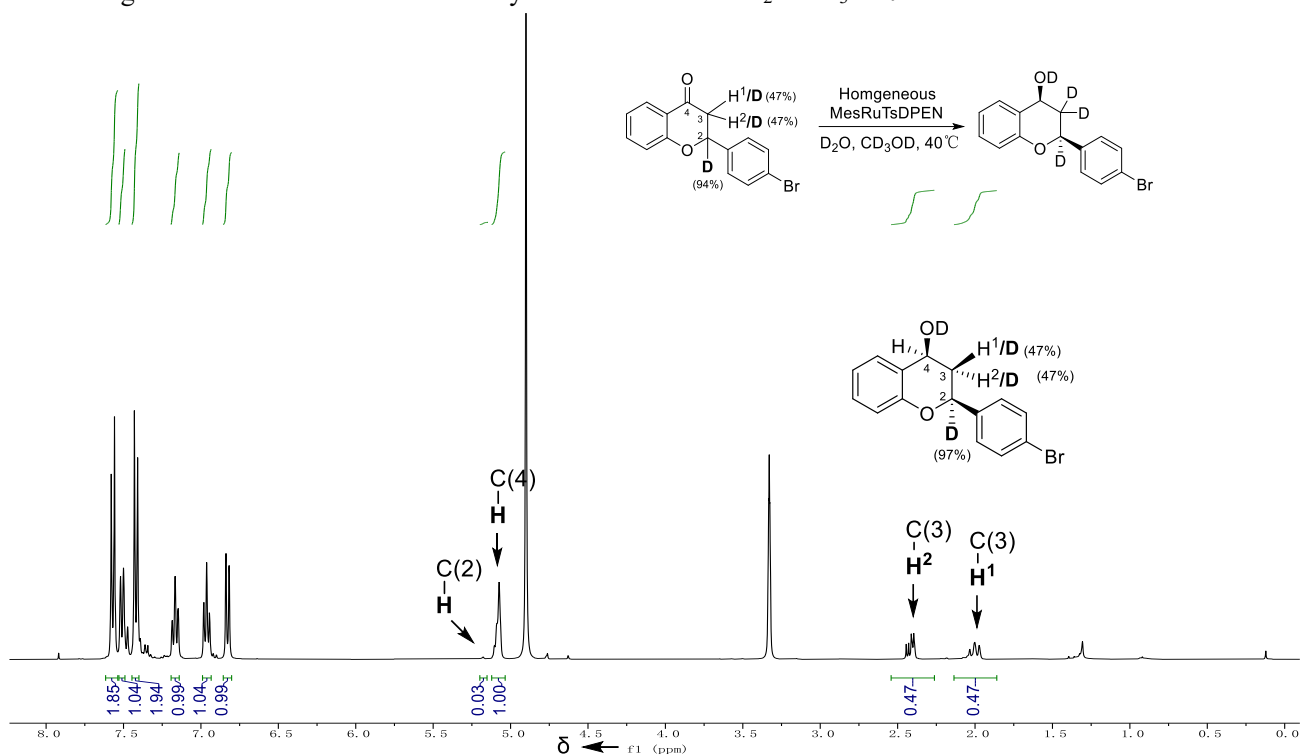

(g) The  $^1\text{H-NMR}$  spectrum of **7aa-d<sub>4</sub>** in the deuterium labeling reaction (control reaction) of **6aa-d<sub>3</sub>** with **3** as a catalyst in the deuterated  $\text{D}_2\text{O}/\text{CD}_3\text{OD}$ .

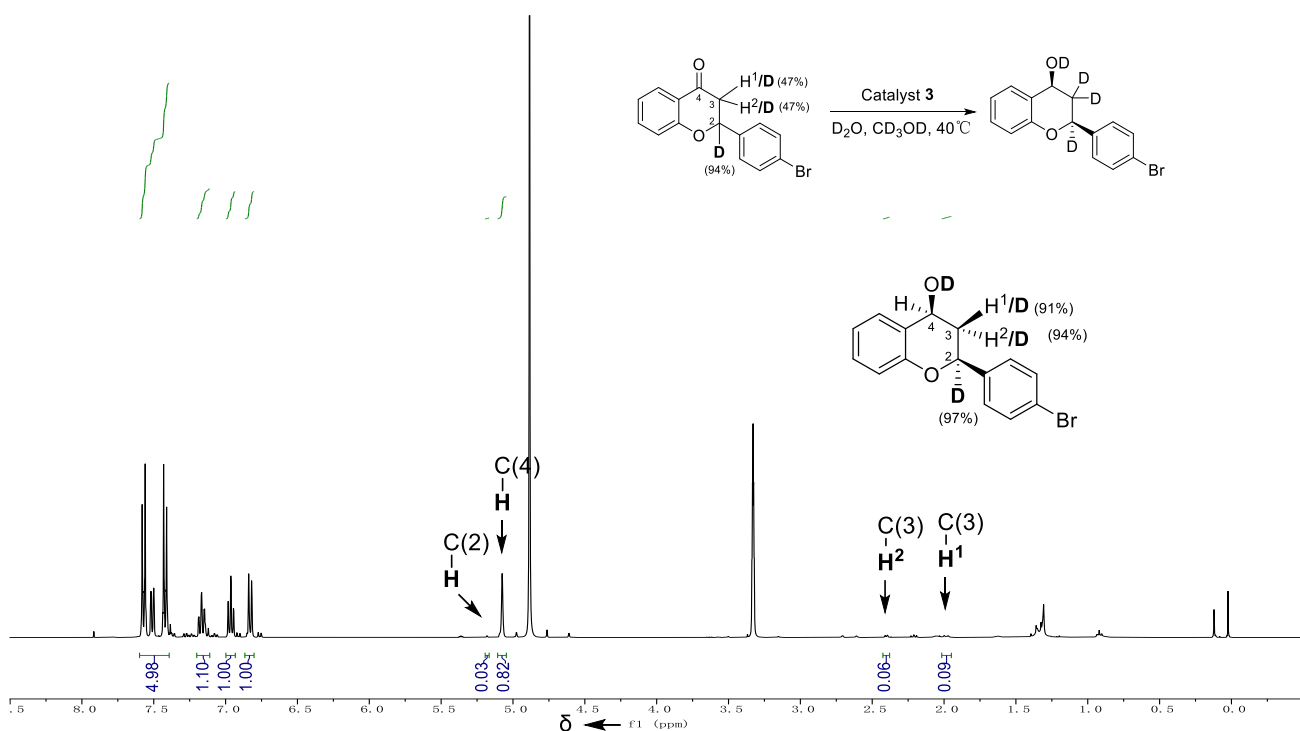

Supplement: d3gc01670f1.pdf [file d3gc01670f1.pdf]
